# Supplementary material for: A new role for histone demethylases in the maintenance of plant genome integrity
Source: eLife journal article supplement (doi:10.7554/elife.58533), 2020-10-27

A

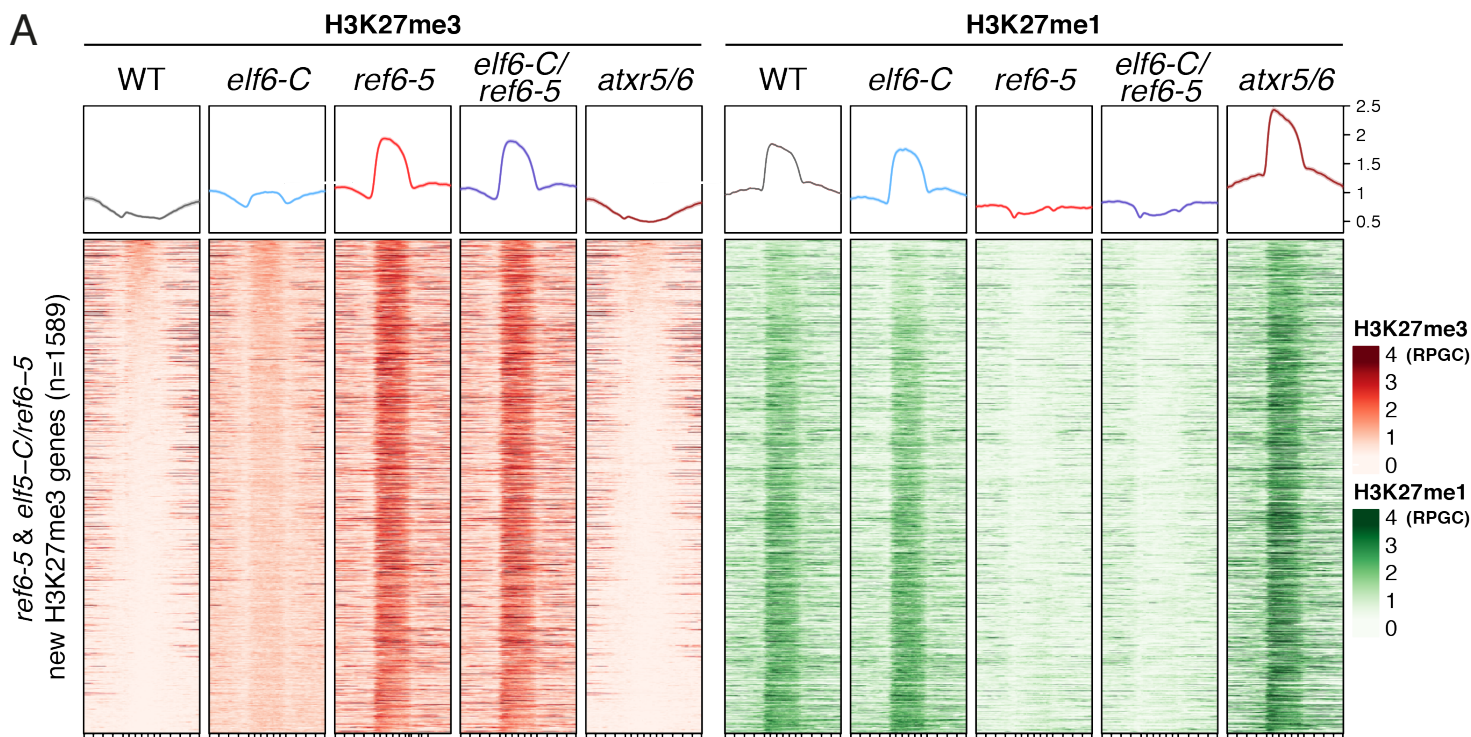

B

*elf6-C/ref6-5* down-regulated & H3K27me3 hyper-methylated genes (n=968)

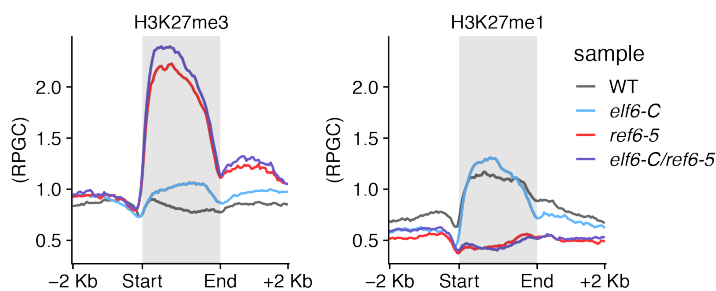

D

*elf6-C/ref6-5* up-regulated and H3K27me3 hypo-methylated genes (n=256)

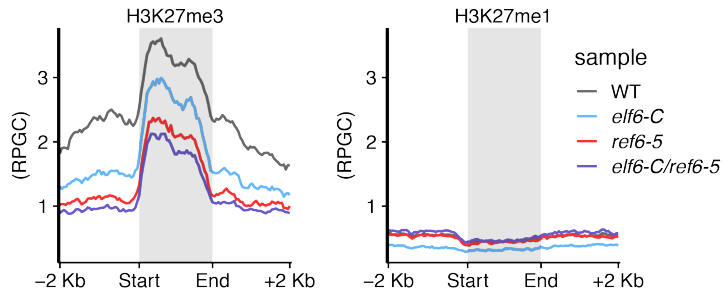

C

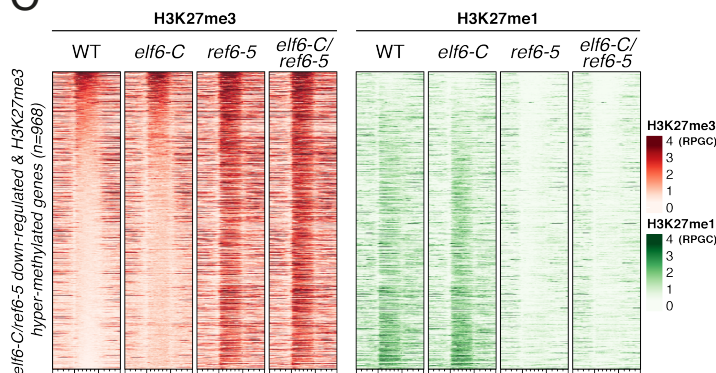

E

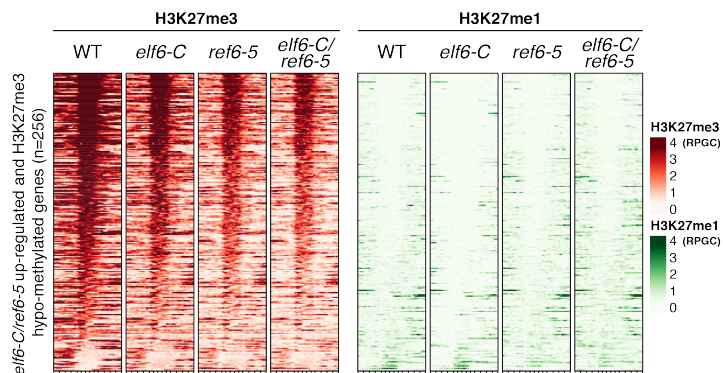

Supplement: supp [file elife-58533-supp-v1.zip]
