# Supplementary material for: A new role for histone demethylases in the maintenance of plant genome integrity
Source: eLife journal article supplement (doi:10.7554/elife.58533), 2020-10-27
Supplement: supp [file elife-58533-supp-v1.zip]

Archive with 24 entries (24 files):
- elife_poa_e58533_Transparent_Reporting_File.pdf
- elife_poa_e58533_Supplementary_file_1.xlsx
- elife_poa_e58533_Supplementary_file_2.xlsx
- elife_poa_e58533_Supplementary_file_3.xlsx
- elife_poa_e58533_Supplementary_file_4.xlsx
- elife_poa_e58533_Figure_1_figure_supplement_1.pdf
- elife_poa_e58533_Figure_1_figure_supplement_2.pdf
- elife_poa_e58533_Figure_1_figure_supplement_3.pdf
- elife_poa_e58533_Figure_1_figure_supplement_4.pdf
- elife_poa_e58533_Figure_1_figure_supplement_5.pdf
- elife_poa_e58533_Figure_1_figure_supplement_6.pdf
- elife_poa_e58533_Figure_2_figure_supplement_1.pdf
- elife_poa_e58533_Figure_2_figure_supplement_2.pdf
- elife_poa_e58533_Figure_2_figure_supplement_3.pdf
- elife_poa_e58533_Figure_2_figure_supplement_4.pdf
- elife_poa_e58533_Figure_2_figure_supplement_5.pdf
- elife_poa_e58533_Figure_3_figure_supplement_1.pdf
- elife_poa_e58533_Figure_3_figure_supplement_2.pdf
- elife_poa_e58533_Figure_4_figure_supplement_1.pdf
- elife_poa_e58533_Figure_4_figure_supplement_2.pdf
- elife_poa_e58533_Figure_4_figure_supplement_3.pdf
- elife_poa_e58533_Figure_5_figure_supplement_1.pdf
- elife_poa_e58533_Figure_6_figure_supplement_1.pdf
- elife_poa_e58533_Figure_6_figure_supplement_2.pdf
