# Supplementary material for: A new role for histone demethylases in the maintenance of plant genome integrity
Source: eLife journal article supplement (doi:10.7554/elife.58533), 2020-10-27
Supplement: supp [file elife-58533-supp-v1.zip › elife_poa_e58533_Supplementary_file_1.xlsx]

## Sheet: Sheet1
Misregulated genes in epiERs A5.B1 and A5.C6
A5.B1 misregulated 1040 genes		A5.C6 misregulated 1128 genes
A5.B1 down 202 genes	A5.B1 up 1038 genes	A5.C6 down 138 genes	A5.C6 up 990 genes
AT1G03106	AT1G01060	AT1G03106	AT1G01560
AT1G03170	AT1G01560	AT1G03550	AT1G01680
AT1G03550	AT1G01680	AT1G04133	AT1G01750
AT1G03790	AT1G02220	AT1G04313	AT1G02220
AT1G04133	AT1G02380	AT1G07550	AT1G02230
AT1G04560	AT1G02450	AT1G08507	AT1G02450
AT1G04660	AT1G02920	AT1G16690	AT1G02820
AT1G05820	AT1G02930	AT1G17260	AT1G02920
AT1G07550	AT1G03820	AT1G17810	AT1G02930
AT1G08507	AT1G05675	AT1G19750	AT1G03820
AT1G10300	AT1G06033	AT1G20480	AT1G03850
AT1G13800	AT1G06160	AT1G21320	AT1G05675
AT1G14790	AT1G06830	AT1G22600	AT1G05680
AT1G16690	AT1G06883	AT1G23935	AT1G05880
AT1G17010	AT1G06923	AT1G23950	AT1G05990
AT1G17232	AT1G06957	AT1G29090	AT1G06160
AT1G17260	AT1G06963	AT1G29730	AT1G06883
AT1G17810	AT1G06967	AT1G30160	AT1G06923
AT1G21870	AT1G06983	AT1G32450	AT1G06957
AT1G22130	AT1G06987	AT1G34460	AT1G06963
AT1G22600	AT1G06993	AT1G47578	AT1G06967
AT1G23935	AT1G06997	AT1G48580	AT1G06983
AT1G29730	AT1G07007	AT1G52650	AT1G06987
AT1G30160	AT1G07017	AT1G54860	AT1G06993
AT1G31350	AT1G07023	AT1G54870	AT1G06997
AT1G37150	AT1G07027	AT1G55050	AT1G07007
AT1G44414	AT1G07327	AT1G60470	AT1G07023
AT1G45015	AT1G07337	AT1G69540	AT1G07327
AT1G45165	AT1G07450	AT1G71250	AT1G07337
AT1G47655	AT1G07483	AT1G72100	AT1G07400
AT1G47670	AT1G08757	AT1G73190	AT1G07620
AT1G47980	AT1G09080	AT1G76720	AT1G08533
AT1G48130	AT1G09240	AT1G79900	AT1G08757
AT1G48580	AT1G09932	AT2G12170	AT1G09080
AT1G49210	AT1G10340	AT2G13555	AT1G09932
AT1G50190	AT1G10370	AT2G14960	AT1G10340
AT1G52000	AT1G10657	AT2G15400	AT1G10370
AT1G54450	AT1G10960	AT2G17430	AT1G13310
AT1G54860	AT1G12610	AT2G18480	AT1G13340
AT1G54870	AT1G13340	AT2G18540	AT1G13470
AT1G55050	AT1G13420	AT2G19660	AT1G13480
AT1G60470	AT1G13470	AT2G19900	AT1G13520
AT1G62262	AT1G13480	AT2G19910	AT1G13650
AT1G62760	AT1G13520	AT2G21720	AT1G14250
AT1G65090	AT1G14250	AT2G21910	AT1G14540
AT1G65330	AT1G14345	AT2G25890	AT1G14550
AT1G65350	AT1G14540	AT2G28490	AT1G14870
AT1G67370	AT1G14550	AT2G31902	AT1G14880
AT1G68800	AT1G14870	AT2G31910	AT1G14960
AT1G71250	AT1G14880	AT2G32460	AT1G15520
AT1G72100	AT1G15520	AT2G36270	AT1G15640
AT1G72620	AT1G16150	AT2G36640	AT1G16410
AT1G73190	AT1G16420	AT2G41210	AT1G16420
AT1G76720	AT1G17050	AT2G41850	AT1G16730
AT1G76820	AT1G17170	AT2G42560	AT1G17170
AT1G78970	AT1G17180	AT2G43050	AT1G17180
AT1G79900	AT1G17250	AT2G47780	AT1G17380
AT2G09785	AT1G17380	AT3G01425	AT1G17710
AT2G11270	AT1G17420	AT3G03620	AT1G18970
AT2G12170	AT1G17710	AT3G04960	AT1G19020
AT2G14520	AT1G18265	AT3G07105	AT1G19050
AT2G14960	AT1G18970	AT3G13065	AT1G19250
AT2G15400	AT1G19020	AT3G13960	AT1G19610
AT2G17430	AT1G19050	AT3G14070	AT1G19670
AT2G18480	AT1G19180	AT3G15280	AT1G19960
AT2G18540	AT1G19250	AT3G15670	AT1G20400
AT2G19240	AT1G19610	AT3G16670	AT1G21120
AT2G19660	AT1G19670	AT3G17520	AT1G21240
AT2G19900	AT1G20310	AT3G24360	AT1G21250
AT2G21490	AT1G20400	AT3G26520	AT1G21520
AT2G21720	AT1G20510	AT3G27440	AT1G21550
AT2G23240	AT1G21120	AT3G27900	AT1G22630
AT2G25600	AT1G21240	AT3G28880	AT1G23140
AT2G25890	AT1G21250	AT3G29140	AT1G23205
AT2G28490	AT1G21520	AT3G32920	AT1G23740
AT2G31902	AT1G21550	AT3G42640	AT1G23915
AT2G31910	AT1G21910	AT3G43790	AT1G24140
AT2G32340	AT1G22120	AT3G47360	AT1G24145
AT2G32460	AT1G22630	AT3G47675	AT1G24147
AT2G35859	AT1G23110	AT3G48260	AT1G24260
AT2G36640	AT1G23140	AT3G53040	AT1G26240
AT2G37670	AT1G23205	AT3G54510	AT1G26380
AT2G39980	AT1G23740	AT3G54940	AT1G26390
AT2G41210	AT1G23915	AT3G58450	AT1G26410
AT2G42170	AT1G24140	AT3G61028	AT1G26420
AT2G42560	AT1G24145	AT4G00380	AT1G26558
AT2G43050	AT1G24147	AT4G03935	AT1G27330
AT2G45610	AT1G26380	AT4G04415	AT1G27565
AT2G47770	AT1G26390	AT4G04710	AT1G27570
AT3G02410	AT1G26410	AT4G06115	AT1G28370
AT3G03341	AT1G26420	AT4G07820	AT1G28480
AT3G03620	AT1G26558	AT4G09160	AT1G28610
AT3G03702	AT1G26762	AT4G10060	AT1G30135
AT3G04960	AT1G27330	AT4G13560	AT1G31095
AT3G05260	AT1G27565	AT4G13564	AT1G32000
AT3G07105	AT1G27570	AT4G16857	AT1G32010
AT3G08350	AT1G28370	AT4G21020	AT1G32350
AT3G09275	AT1G28480	AT4G21323	AT1G32920
AT3G09745	AT1G28600	AT4G25707	AT1G32960
AT3G14070	AT1G29860	AT4G26140	AT1G33730
AT3G14880	AT1G30135	AT4G29990	AT1G33760
AT3G15670	AT1G30730	AT4G31380	AT1G33950
AT3G17520	AT1G31095	AT4G31620	AT1G33960
AT3G18320	AT1G31173	AT4G35570	AT1G34060
AT3G21320	AT1G31690	AT4G36280	AT1G34440
AT3G21370	AT1G32000	AT4G36600	AT1G35140
AT3G22640	AT1G32010	AT4G37553	AT1G35210
AT3G24360	AT1G32350	AT5G01180	AT1G35215
AT3G24420	AT1G32780	AT5G02370	AT1G35230
AT3G25060	AT1G32960	AT5G02540	AT1G35375
AT3G26512	AT1G33730	AT5G03860	AT1G35560
AT3G26520	AT1G33760	AT5G06235	AT1G35710
AT3G27900	AT1G33950	AT5G07720	AT1G36005
AT3G29140	AT1G33960	AT5G10120	AT1G36020
AT3G29670	AT1G34060	AT5G10140	AT1G36078
AT3G30180	AT1G34440	AT5G14565	AT1G36085
AT3G32940	AT1G34580	AT5G22470	AT1G36230
AT3G42640	AT1G35140	AT5G22794	AT1G36240
AT3G43790	AT1G35210	AT5G23980	AT1G36622
AT3G47360	AT1G35215	AT5G25350	AT1G36675
AT3G47675	AT1G35230	AT5G26146	AT1G36745
AT3G51070	AT1G35375	AT5G27220	AT1G36920
AT3G51810	AT1G35500	AT5G35660	AT1G36922
AT3G53040	AT1G35710	AT5G36870	AT1G37113
AT3G54940	AT1G36005	AT5G38140	AT1G40087
AT3G55500	AT1G36020	AT5G38150	AT1G42560
AT3G58450	AT1G36078	AT5G39160	AT1G42615
AT3G61028	AT1G36085	AT5G39190	AT1G42680
AT3G61090	AT1G36230	AT5G40100	AT1G43160
AT3G62070	AT1G36240	AT5G42280	AT1G43730
AT3G62090	AT1G36622	AT5G44310	AT1G43815
AT3G62500	AT1G36675	AT5G48090	AT1G43910
AT4G00380	AT1G36745	AT5G52300	AT1G44000
AT4G03935	AT1G36920	AT5G53870	AT1G45145
AT4G04415	AT1G36922	AT5G56810	AT1G46696
AT4G06115	AT1G37000	AT5G59260	AT1G47265
AT4G07820	AT1G37113	AT5G59650	AT1G47395
AT4G10060	AT1G40087	AT5G65165	AT1G47400
AT4G10200	AT1G41820		AT1G47657
AT4G13560	AT1G42560		AT1G47890
AT4G14103	AT1G42615		AT1G48285
AT4G14130	AT1G42680		AT1G49570
AT4G16160	AT1G43160		AT1G51172
AT4G21020	AT1G43260		AT1G51620
AT4G22730	AT1G43730		AT1G51820
AT4G25707	AT1G43815		AT1G52120
AT4G30120	AT1G43910		AT1G52200
AT4G31380	AT1G44000		AT1G52342
AT4G31620	AT1G44130		AT1G52343
AT4G32280	AT1G45145		AT1G52590
AT4G33280	AT1G46696		AT1G52940
AT4G33980	AT1G47265		AT1G53080
AT4G35570	AT1G47395		AT1G53480
AT4G36600	AT1G47400		AT1G53490
AT4G38775	AT1G47657		AT1G53610
AT5G01215	AT1G48285		AT1G53625
AT5G01675	AT1G49570		AT1G54050
AT5G02370	AT1G49680		AT1G54420
AT5G02540	AT1G50930		AT1G54530
AT5G03860	AT1G51172		AT1G55390
AT5G06395	AT1G51620		AT1G55480
AT5G07571	AT1G51790		AT1G55650
AT5G07760	AT1G51800		AT1G56060
AT5G08600	AT1G51820		AT1G56240
AT5G10120	AT1G51890		AT1G56250
AT5G10140	AT1G51913		AT1G56650
AT5G10770	AT1G51920		AT1G57560
AT5G13210	AT1G52120		AT1G57590
AT5G13930	AT1G52200		AT1G57630
AT5G16000	AT1G52342		AT1G58225
AT5G20420	AT1G52343		AT1G58320
AT5G22470	AT1G52820		AT1G58420
AT5G23980	AT1G52940		AT1G59860
AT5G25340	AT1G53080		AT1G59920
AT5G25475	AT1G53480		AT1G59930
AT5G25880	AT1G53490		AT1G60095
AT5G27220	AT1G53625		AT1G60110
AT5G27600	AT1G53920		AT1G60130
AT5G28442	AT1G54050		AT1G61120
AT5G35660	AT1G54420		AT1G61610
AT5G35940	AT1G55390		AT1G61800
AT5G36870	AT1G55450		AT1G62580
AT5G38000	AT1G55480		AT1G62980
AT5G38240	AT1G55650		AT1G63295
AT5G39160	AT1G56060		AT1G63410
AT5G39190	AT1G56240		AT1G63540
AT5G40420	AT1G56250		AT1G63550
AT5G42280	AT1G56650		AT1G63580
AT5G44310	AT1G57560		AT1G64360
AT5G44930	AT1G57590		AT1G64795
AT5G45080	AT1G57630		AT1G65481
AT5G45150	AT1G58225		AT1G65483
AT5G45730	AT1G58320		AT1G65486
AT5G48090	AT1G58420		AT1G65490
AT5G49440	AT1G59725		AT1G65500
AT5G49640	AT1G59920		AT1G65690
AT5G52300	AT1G59930		AT1G65790
AT5G56810	AT1G60110		AT1G65870
AT5G60760	AT1G60130		AT1G66160
AT5G62490	AT1G61120		AT1G66465
AT5G65165	AT1G61255		AT1G66570
ATMG00030	AT1G61610		AT1G66700
	AT1G61795		AT1G66725
	AT1G61800		AT1G66860
	AT1G62580		AT1G66920
	AT1G62780		AT1G67105
	AT1G63540		AT1G67148
	AT1G63580		AT1G67235
	AT1G64795		AT1G67360
	AT1G65481		AT1G67520
	AT1G65484		AT1G67980
	AT1G65486		AT1G68660
	AT1G65490		AT1G69720
	AT1G65500		AT1G69880
	AT1G65510		AT1G69920
	AT1G65790		AT1G69930
	AT1G65845		AT1G70270
	AT1G65870		AT1G70700
	AT1G66090		AT1G70810
	AT1G66160		AT1G71000
	AT1G66465		AT1G71920
	AT1G66570		AT1G72520
	AT1G66725		AT1G72900
	AT1G66860		AT1G72910
	AT1G66880		AT1G72920
	AT1G66920		AT1G72930
	AT1G67105		AT1G73010
	AT1G67235		AT1G73120
	AT1G67980		AT1G73600
	AT1G68660		AT1G73700
	AT1G68765		AT1G73805
	AT1G68870		AT1G73810
	AT1G69523		AT1G74590
	AT1G69720		AT1G74730
	AT1G69880		AT1G75040
	AT1G69920		AT1G75945
	AT1G69930		AT1G76470
	AT1G70270		AT1G76650
	AT1G70700		AT1G76930
	AT1G70760		AT1G76955
	AT1G70810		AT1G76960
	AT1G70985		AT1G77640
	AT1G71000		AT1G77960
	AT1G71920		AT1G78340
	AT1G72030		AT1G78370
	AT1G72450		AT1G78410
	AT1G72520		AT1G79320
	AT1G72900		AT1G79680
	AT1G72910		AT2G01422
	AT1G72920		AT2G02103
	AT1G72930		AT2G02990
	AT1G73600		AT2G03370
	AT1G73700		AT2G03720
	AT1G73805		AT2G03760
	AT1G74590		AT2G03965
	AT1G74650		AT2G04039
	AT1G74730		AT2G04040
	AT1G75040		AT2G04050
	AT1G75830		AT2G04365
	AT1G75945		AT2G04450
	AT1G76470		AT2G04495
	AT1G76640		AT2G04785
	AT1G76650		AT2G04885
	AT1G76930		AT2G05015
	AT1G76955		AT2G05050
	AT1G76960		AT2G05350
	AT1G77090		AT2G05635
	AT1G77640		AT2G05642
	AT1G77960		AT2G05665
	AT1G78410		AT2G05765
	AT1G79320		AT2G05914
	AT1G79680		AT2G05915
	AT1G80840		AT2G05995
	AT2G01422		AT2G06002
	AT2G02010		AT2G06050
	AT2G02103		AT2G06095
	AT2G02990		AT2G06105
	AT2G03760		AT2G06185
	AT2G03965		AT2G06265
	AT2G04039		AT2G06305
	AT2G04050		AT2G06420
	AT2G04070		AT2G06425
	AT2G04365		AT2G06455
	AT2G04450		AT2G06475
	AT2G04495		AT2G06562
	AT2G04515		AT2G06570
	AT2G04785		AT2G06645
	AT2G04885		AT2G06845
	AT2G05015		AT2G06904
	AT2G05050		AT2G07213
	AT2G05350		AT2G07215
	AT2G05635		AT2G07240
	AT2G05642		AT2G07640
	AT2G05665		AT2G07750
	AT2G05685		AT2G07760
	AT2G05914		AT2G07800
	AT2G05915		AT2G08950
	AT2G05995		AT2G09150
	AT2G06002		AT2G09388
	AT2G06050		AT2G09840
	AT2G06095		AT2G10025
	AT2G06105		AT2G10260
	AT2G06185		AT2G10545
	AT2G06265		AT2G10955
	AT2G06305		AT2G10975
	AT2G06420		AT2G11405
	AT2G06425		AT2G11522
	AT2G06455		AT2G11623
	AT2G06475		AT2G11773
	AT2G06562		AT2G11778
	AT2G06570		AT2G11851
	AT2G06645		AT2G12205
	AT2G06845		AT2G12935
	AT2G06904		AT2G13450
	AT2G06906		AT2G13547
	AT2G07213		AT2G13810
	AT2G07215		AT2G14247
	AT2G07240		AT2G14560
	AT2G07750		AT2G14610
	AT2G07760		AT2G14765
	AT2G07800		AT2G14945
	AT2G08220		AT2G15042
	AT2G08950		AT2G15110
	AT2G09150		AT2G15220
	AT2G09388		AT2G15420
	AT2G09840		AT2G15490
	AT2G10025		AT2G15555
	AT2G10260		AT2G15790
	AT2G10545		AT2G16018
	AT2G10921		AT2G16050
	AT2G10955		AT2G16340
	AT2G10975		AT2G16676
	AT2G11405		AT2G17040
	AT2G11522		AT2G17690
	AT2G11623		AT2G17695
	AT2G11773		AT2G17740
	AT2G11778		AT2G17920
	AT2G11810		AT2G18193
	AT2G11851		AT2G18660
	AT2G12205		AT2G18690
	AT2G12875		AT2G19050
	AT2G12935		AT2G19060
	AT2G13450		AT2G19190
	AT2G13547		AT2G19365
	AT2G13810		AT2G19800
	AT2G14247		AT2G19850
	AT2G14560		AT2G20142
	AT2G14610		AT2G20562
	AT2G14765		AT2G21320
	AT2G14945		AT2G21640
	AT2G15020		AT2G21650
	AT2G15110		AT2G22860
	AT2G15420		AT2G22880
	AT2G15490		AT2G23110
	AT2G15555		AT2G23270
	AT2G15790		AT2G23620
	AT2G16018		AT2G23670
	AT2G16050		AT2G23960
	AT2G16430		AT2G24850
	AT2G16676		AT2G25000
	AT2G17040		AT2G25240
	AT2G17690		AT2G25297
	AT2G17695		AT2G25440
	AT2G17740		AT2G25470
	AT2G17920		AT2G25510
	AT2G18193		AT2G25735
	AT2G18328		AT2G25770
	AT2G18660		AT2G26010
	AT2G18690		AT2G26020
	AT2G18969		AT2G26040
	AT2G19050		AT2G26150
	AT2G19060		AT2G26400
	AT2G19190		AT2G26560
	AT2G19365		AT2G27080
	AT2G19850		AT2G27389
	AT2G19960		AT2G27402
	AT2G19970		AT2G27660
	AT2G20142		AT2G27690
	AT2G21320		AT2G28500
	AT2G21650		AT2G29110
	AT2G22880		AT2G29350
	AT2G23130		AT2G29440
	AT2G24600		AT2G29450
	AT2G24850		AT2G29460
	AT2G25000		AT2G29470
	AT2G25297		AT2G29490
	AT2G25440		AT2G29500
	AT2G25470		AT2G30750
	AT2G25510		AT2G30766
	AT2G26010		AT2G30770
	AT2G26020		AT2G32020
	AT2G26040		AT2G32030
	AT2G26150		AT2G32140
	AT2G26400		AT2G32160
	AT2G26560		AT2G32190
	AT2G27402		AT2G32200
	AT2G27420		AT2G32210
	AT2G27660		AT2G32290
	AT2G27690		AT2G32487
	AT2G28500		AT2G32530
	AT2G29090		AT2G32680
	AT2G29340		AT2G32830
	AT2G29350		AT2G33080
	AT2G29450		AT2G33175
	AT2G29460		AT2G33180
	AT2G29470		AT2G34202
	AT2G29490		AT2G34600
	AT2G30230		AT2G34655
	AT2G30750		AT2G35070
	AT2G30766		AT2G35290
	AT2G30770		AT2G35980
	AT2G31570		AT2G36750
	AT2G32020		AT2G37125
	AT2G32030		AT2G37240
	AT2G32140		AT2G37430
	AT2G32200		AT2G37770
	AT2G32210		AT2G37970
	AT2G32290		AT2G38195
	AT2G32487		AT2G38220
	AT2G32680		AT2G38240
	AT2G33175		AT2G38823
	AT2G33180		AT2G38870
	AT2G34600		AT2G39030
	AT2G34655		AT2G39200
	AT2G34720		AT2G39518
	AT2G35930		AT2G40435
	AT2G35980		AT2G40750
	AT2G36750		AT2G40955
	AT2G36790		AT2G41090
	AT2G36800		AT2G41260
	AT2G37125		AT2G41590
	AT2G37240		AT2G41730
	AT2G37430		AT2G42360
	AT2G37970		AT2G43000
	AT2G38195		AT2G43340
	AT2G38220		AT2G43510
	AT2G38240		AT2G43530
	AT2G38530		AT2G43570
	AT2G38740		AT2G43620
	AT2G38750		AT2G44240
	AT2G38823		AT2G44290
	AT2G38870		AT2G44370
	AT2G39030		AT2G44670
	AT2G39200		AT2G45130
	AT2G39210		AT2G45760
	AT2G39518		AT2G46400
	AT2G39920		AT2G46430
	AT2G40435		AT2G46440
	AT2G40750		AT2G46650
	AT2G40955		AT2G46830
	AT2G40960		AT2G46880
	AT2G41090		AT3G01060
	AT2G41100		AT3G01080
	AT2G41590		AT3G01345
	AT2G41730		AT3G01830
	AT2G41800		AT3G02240
	AT2G42250		AT3G03085
	AT2G42360		AT3G03190
	AT2G42760		AT3G04210
	AT2G42975		AT3G04420
	AT2G43510		AT3G05395
	AT2G43530		AT3G05485
	AT2G43570		AT3G05595
	AT2G43620		AT3G05936
	AT2G43865		AT3G05955
	AT2G44240		AT3G06215
	AT2G44290		AT3G06245
	AT2G44370		AT3G06475
	AT2G44670		AT3G06515
	AT2G44840		AT3G06585
	AT2G44910		AT3G06625
	AT2G45220		AT3G06645
	AT2G45760		AT3G07095
	AT2G46400		AT3G07195
	AT2G46440		AT3G07600
	AT2G46650		AT3G08870
	AT2G46830		AT3G09400
	AT2G46880		AT3G09922
	AT2G47730		AT3G09925
	AT3G01060		AT3G10150
	AT3G01345		AT3G10930
	AT3G01440		AT3G12220
	AT3G01550		AT3G12502
	AT3G01830		AT3G13275
	AT3G02240		AT3G13276
	AT3G02380		AT3G13433
	AT3G02840		AT3G13437
	AT3G03085		AT3G13650
	AT3G03190		AT3G13950
	AT3G04210		AT3G14362
	AT3G04320		AT3G14620
	AT3G05395		AT3G14670
	AT3G05485		AT3G14700
	AT3G05595		AT3G15518
	AT3G05936		AT3G15536
	AT3G05955		AT3G17609
	AT3G06145		AT3G18250
	AT3G06215		AT3G19660
	AT3G06245		AT3G20600
	AT3G06475		AT3G21351
	AT3G06515		AT3G21352
	AT3G06585		AT3G21460
	AT3G06605		AT3G22231
	AT3G06625		AT3G22235
	AT3G06645		AT3G22275
	AT3G06655		AT3G22570
	AT3G07095		AT3G22740
	AT3G07195		AT3G22840
	AT3G08870		AT3G22860
	AT3G09400		AT3G23060
	AT3G09600		AT3G23120
	AT3G09925		AT3G23230
	AT3G10150		AT3G23250
	AT3G10520		AT3G23550
	AT3G11090		AT3G24463
	AT3G12320		AT3G24500
	AT3G13433		AT3G24542
	AT3G13950		AT3G24900
	AT3G14200		AT3G24982
	AT3G14670		AT3G25010
	AT3G15518		AT3G25180
	AT3G15536		AT3G25250
	AT3G17609		AT3G25720
	AT3G18250		AT3G25760
	AT3G18710		AT3G25770
	AT3G19010		AT3G25780
	AT3G20600		AT3G25882
	AT3G21080		AT3G26815
	AT3G21351		AT3G26830
	AT3G21460		AT3G27040
	AT3G21500		AT3G27140
	AT3G21510		AT3G27473
	AT3G21781		AT3G28170
	AT3G22060		AT3G28193
	AT3G22231		AT3G28210
	AT3G22235		AT3G28310
	AT3G22275		AT3G28510
	AT3G22570		AT3G28540
	AT3G22740		AT3G28580
	AT3G22840		AT3G28890
	AT3G22860		AT3G28899
	AT3G23060		AT3G28917
	AT3G23120		AT3G28930
	AT3G23170		AT3G29000
	AT3G23230		AT3G29034
	AT3G23250		AT3G29080
	AT3G24463		AT3G29410
	AT3G24500		AT3G29430
	AT3G24542		AT3G29580
	AT3G24982		AT3G29631
	AT3G25010		AT3G29638
	AT3G25180		AT3G29639
	AT3G25250		AT3G29750
	AT3G25720		AT3G30165
	AT3G25760		AT3G30320
	AT3G25770		AT3G30720
	AT3G25780		AT3G30770
	AT3G25882		AT3G30820
	AT3G26320		AT3G30823
	AT3G26815		AT3G31350
	AT3G26818		AT3G31910
	AT3G26830		AT3G33528
	AT3G27140		AT3G42723
	AT3G27400		AT3G42786
	AT3G27473		AT3G43110
	AT3G27940		AT3G43148
	AT3G28070		AT3G43290
	AT3G28170		AT3G43340
	AT3G28193		AT3G43833
	AT3G28210		AT3G43837
	AT3G28310		AT3G44070
	AT3G28510		AT3G44265
	AT3G28540		AT3G44350
	AT3G28580		AT3G44450
	AT3G28890		AT3G44860
	AT3G28899		AT3G45130
	AT3G28917		AT3G45860
	AT3G28930		AT3G46080
	AT3G29000		AT3G46090
	AT3G29034		AT3G46230
	AT3G29080		AT3G46280
	AT3G29410		AT3G46650
	AT3G29580		AT3G46670
	AT3G29631		AT3G47030
	AT3G29638		AT3G47070
	AT3G29639		AT3G47090
	AT3G29750		AT3G47480
	AT3G30165		AT3G48320
	AT3G30320		AT3G48630
	AT3G30720		AT3G48640
	AT3G30770		AT3G48850
	AT3G30820		AT3G49340
	AT3G30823		AT3G49570
	AT3G31350		AT3G49580
	AT3G31910		AT3G49620
	AT3G32030		AT3G49845
	AT3G33528		AT3G50060
	AT3G42723		AT3G50320
	AT3G43110		AT3G50480
	AT3G43148		AT3G50540
	AT3G43290		AT3G50760
	AT3G43340		AT3G50770
	AT3G43833		AT3G50800
	AT3G43837		AT3G50930
	AT3G44070		AT3G51450
	AT3G44265		AT3G51660
	AT3G44450		AT3G51750
	AT3G44630		AT3G52430
	AT3G44860		AT3G52748
	AT3G45130		AT3G53150
	AT3G46080		AT3G53232
	AT3G46090		AT3G54150
	AT3G46110		AT3G54730
	AT3G46280		AT3G55790
	AT3G46650		AT3G55970
	AT3G47430		AT3G56290
	AT3G47480		AT3G56360
	AT3G48100		AT3G56400
	AT3G48320		AT3G56710
	AT3G48630		AT3G56970
	AT3G48640		AT3G56980
	AT3G48700		AT3G57240
	AT3G48920		AT3G57260
	AT3G48940		AT3G57460
	AT3G49340		AT3G57587
	AT3G49620		AT3G57950
	AT3G50060		AT3G58990
	AT3G50300		AT3G59750
	AT3G50320		AT3G60120
	AT3G50480		AT3G60176
	AT3G50540		AT3G60415
	AT3G50760		AT3G60540
	AT3G50770		AT3G60950
	AT3G50800		AT3G61030
	AT3G50930		AT3G61190
	AT3G51450		AT3G61280
	AT3G51660		AT3G62410
	AT3G51750		AT3G63380
	AT3G51920		AT4G00130
	AT3G52430		AT4G03156
	AT3G52740		AT4G03157
	AT3G52748		AT4G03450
	AT3G53150		AT4G03570
	AT3G54150		AT4G03590
	AT3G54730		AT4G03830
	AT3G55566		AT4G03875
	AT3G55970		AT4G03950
	AT3G56290		AT4G04030
	AT3G56400		AT4G04110
	AT3G56710		AT4G04223
	AT3G56970		AT4G04265
	AT3G56980		AT4G04402
	AT3G57157		AT4G04490
	AT3G57240		AT4G04500
	AT3G57260		AT4G04510
	AT3G57460		AT4G04745
	AT3G57587		AT4G05215
	AT3G57700		AT4G05225
	AT3G58990		AT4G05295
	AT3G59750		AT4G06643
	AT3G60176		AT4G06688
	AT3G60415		AT4G07445
	AT3G60540		AT4G07526
	AT3G60650		AT4G07835
	AT3G60950		AT4G07868
	AT3G61030		AT4G07965
	AT3G61190		AT4G07995
	AT3G61220		AT4G08190
	AT3G61280		AT4G08260
	AT3G63380		AT4G08430
	AT4G00130		AT4G08555
	AT4G00165		AT4G08593
	AT4G00540		AT4G08620
	AT4G01883		AT4G08691
	AT4G01895		AT4G09350
	AT4G02170		AT4G09355
	AT4G02330		AT4G10040
	AT4G02850		AT4G10250
	AT4G03156		AT4G10500
	AT4G03157		AT4G10860
	AT4G03450		AT4G11170
	AT4G03460		AT4G11175
	AT4G03570		AT4G11210
	AT4G03590		AT4G11373
	AT4G03830		AT4G11890
	AT4G03875		AT4G12470
	AT4G03950		AT4G12480
	AT4G04030		AT4G12490
	AT4G04110		AT4G12500
	AT4G04223		AT4G12735
	AT4G04265		AT4G13180
	AT4G04402		AT4G13420
	AT4G04490		AT4G13800
	AT4G04500		AT4G14020
	AT4G04510		AT4G14365
	AT4G04540		AT4G14400
	AT4G05215		AT4G14630
	AT4G05225		AT4G15210
	AT4G06643		AT4G15242
	AT4G06688		AT4G15660
	AT4G06810		AT4G15670
	AT4G07445		AT4G15680
	AT4G07526		AT4G15700
	AT4G07835		AT4G15975
	AT4G07868		AT4G16215
	AT4G07965		AT4G17670
	AT4G07995		AT4G18150
	AT4G08190		AT4G18250
	AT4G08260		AT4G18253
	AT4G08430		AT4G18440
	AT4G08593		AT4G19080
	AT4G08691		AT4G19240
	AT4G08770		AT4G19430
	AT4G08870		AT4G20000
	AT4G09350		AT4G21380
	AT4G09355		AT4G21680
	AT4G09750		AT4G21830
	AT4G10040		AT4G21840
	AT4G10500		AT4G22460
	AT4G10860		AT4G22470
	AT4G11000		AT4G22666
	AT4G11170		AT4G22710
	AT4G11210		AT4G23130
	AT4G11470		AT4G23140
	AT4G11521		AT4G23150
	AT4G11890		AT4G23170
	AT4G12440		AT4G23230
	AT4G12470		AT4G23310
	AT4G12480		AT4G23320
	AT4G12490		AT4G23496
	AT4G12500		AT4G23610
	AT4G12720		AT4G24110
	AT4G12735		AT4G24350
	AT4G13180		AT4G24380
	AT4G13800		AT4G24700
	AT4G14365		AT4G25050
	AT4G14400		AT4G25200
	AT4G14690		AT4G25790
	AT4G15210		AT4G25810
	AT4G15242		AT4G26200
	AT4G15417		AT4G26260
	AT4G15660		AT4G28460
	AT4G15670		AT4G28660
	AT4G15680		AT4G28740
	AT4G15975		AT4G28850
	AT4G16215		AT4G28870
	AT4G16880		AT4G29200
	AT4G17090		AT4G30280
	AT4G17670		AT4G30530
	AT4G18150		AT4G31398
	AT4G18250		AT4G31800
	AT4G18253		AT4G31870
	AT4G18440		AT4G31970
	AT4G18940		AT4G32800
	AT4G19080		AT4G32870
	AT4G19240		AT4G33050
	AT4G19680		AT4G33666
	AT4G19975		AT4G33720
	AT4G20000		AT4G34320
	AT4G21680		AT4G34410
	AT4G21840		AT4G35180
	AT4G22214		AT4G36950
	AT4G22217		AT4G36990
	AT4G22460		AT4G37990
	AT4G22470		AT4G38560
	AT4G22680		AT4G39110
	AT4G22880		AT4G39670
	AT4G23130		AT4G39675
	AT4G23140		AT5G01080
	AT4G23150		AT5G01100
	AT4G23170		AT5G01540
	AT4G23200		AT5G01900
	AT4G23210		AT5G02490
	AT4G23220		AT5G02780
	AT4G23230		AT5G03090
	AT4G23260		AT5G03204
	AT4G23280		AT5G03350
	AT4G23290		AT5G04150
	AT4G23310		AT5G04245
	AT4G23320		AT5G04625
	AT4G23496		AT5G04815
	AT4G23610		AT5G04830
	AT4G23810		AT5G04925
	AT4G24110		AT5G04935
	AT4G24350		AT5G04985
	AT4G24380		AT5G05005
	AT4G26200		AT5G05015
	AT4G26260		AT5G05065
	AT4G27030		AT5G05105
	AT4G28420		AT5G05250
	AT4G28460		AT5G05300
	AT4G28520		AT5G05500
	AT4G28660		AT5G05600
	AT4G28740		AT5G07550
	AT4G28850		AT5G07570
	AT4G28870		AT5G07572
	AT4G29200		AT5G08760
	AT4G29610		AT5G09930
	AT4G30530		AT5G10380
	AT4G31398		AT5G10760
	AT4G31800		AT5G11140
	AT4G31870		AT5G11210
	AT4G31940		AT5G11410
	AT4G31970		AT5G12880
	AT4G32800		AT5G13080
	AT4G33050		AT5G13220
	AT4G33660		AT5G13320
	AT4G33720		AT5G14700
	AT4G34150		AT5G15360
	AT4G34410		AT5G15420
	AT4G35180		AT5G15600
	AT4G36570		AT5G15685
	AT4G36990		AT5G15690
	AT4G37290		AT5G17220
	AT4G37810		AT5G17390
	AT4G37925		AT5G18840
	AT4G37990		AT5G19240
	AT4G38560		AT5G19470
	AT4G39110		AT5G19880
	AT4G39630		AT5G19890
	AT4G39670		AT5G20230
	AT4G39675		AT5G22300
	AT4G39970		AT5G22390
	AT5G01080		AT5G22520
	AT5G01100		AT5G22530
	AT5G01540		AT5G22540
	AT5G01900		AT5G22570
	AT5G02490		AT5G24150
	AT5G03090		AT5G24155
	AT5G03285		AT5G24200
	AT5G03350		AT5G24210
	AT5G04150		AT5G24240
	AT5G04245		AT5G24313
	AT5G04625		AT5G24480
	AT5G04815		AT5G24530
	AT5G04830		AT5G24640
	AT5G04925		AT5G24660
	AT5G04935		AT5G25250
	AT5G04985		AT5G25260
	AT5G05005		AT5G26170
	AT5G05015		AT5G26270
	AT5G05065		AT5G26320
	AT5G05105		AT5G26690
	AT5G05250		AT5G27060
	AT5G05580		AT5G27340
	AT5G05600		AT5G27607
	AT5G07450		AT5G28090
	AT5G07550		AT5G28180
	AT5G07570		AT5G28235
	AT5G08640		AT5G28237
	AT5G08760		AT5G28550
	AT5G09800		AT5G28560
	AT5G09805		AT5G28810
	AT5G09930		AT5G28823
	AT5G10380		AT5G28824
	AT5G10680		AT5G29050
	AT5G10760		AT5G29560
	AT5G11210		AT5G30360
	AT5G11410		AT5G30520
	AT5G12880		AT5G32590
	AT5G13220		AT5G32670
	AT5G13320		AT5G33210
	AT5G14330		AT5G33355
	AT5G14700		AT5G33390
	AT5G15360		AT5G33898
	AT5G15420		AT5G34869
	AT5G15685		AT5G35050
	AT5G15690		AT5G35067
	AT5G16170		AT5G35120
	AT5G16200		AT5G35375
	AT5G17220		AT5G35480
	AT5G17340		AT5G35490
	AT5G18840		AT5G35760
	AT5G18937		AT5G36790
	AT5G19240		AT5G36920
	AT5G19470		AT5G36925
	AT5G19730		AT5G38005
	AT5G19880		AT5G38190
	AT5G19890		AT5G38386
	AT5G20935		AT5G38700
	AT5G22300		AT5G38900
	AT5G22390		AT5G38910
	AT5G22520		AT5G39580
	AT5G22530		AT5G39670
	AT5G22540		AT5G39770
	AT5G22570		AT5G39775
	AT5G24110		AT5G40010
	AT5G24150		AT5G40590
	AT5G24155		AT5G40730
	AT5G24200		AT5G40990
	AT5G24210		AT5G41660
	AT5G24240		AT5G41750
	AT5G24313		AT5G41761
	AT5G24480		AT5G42380
	AT5G24640		AT5G42530
	AT5G24660		AT5G42800
	AT5G25180		AT5G42830
	AT5G25200		AT5G42890
	AT5G25250		AT5G42930
	AT5G25260		AT5G42980
	AT5G26170		AT5G42990
	AT5G26270		AT5G43150
	AT5G26320		AT5G43170
	AT5G26690		AT5G43180
	AT5G26920		AT5G43260
	AT5G27060		AT5G43520
	AT5G27340		AT5G43570
	AT5G27420		AT5G43580
	AT5G27607		AT5G43590
	AT5G28090		AT5G43750
	AT5G28180		AT5G43850
	AT5G28235		AT5G43860
	AT5G28237		AT5G43970
	AT5G28550		AT5G44005
	AT5G28560		AT5G44110
	AT5G28810		AT5G44420
	AT5G28823		AT5G44430
	AT5G28824		AT5G44565
	AT5G29050		AT5G44567
	AT5G29560		AT5G44568
	AT5G30360		AT5G44572
	AT5G30520		AT5G44575
	AT5G32590		AT5G44580
	AT5G32613		AT5G44585
	AT5G32670		AT5G44610
	AT5G33210		AT5G44720
	AT5G33390		AT5G44820
	AT5G33898		AT5G44900
	AT5G34869		AT5G44973
	AT5G35050		AT5G44990
	AT5G35067		AT5G45000
	AT5G35120		AT5G45090
	AT5G35375		AT5G45095
	AT5G35480		AT5G45380
	AT5G35490		AT5G45570
	AT5G35760		AT5G45630
	AT5G36790		AT5G45680
	AT5G36920		AT5G45775
	AT5G36925		AT5G45920
	AT5G37490		AT5G45970
	AT5G37600		AT5G46230
	AT5G38005		AT5G46350
	AT5G38190		AT5G46790
	AT5G38310		AT5G46890
	AT5G38386		AT5G46915
	AT5G38430		AT5G47130
	AT5G38900		AT5G47260
	AT5G39580		AT5G47280
	AT5G39670		AT5G47330
	AT5G39770		AT5G48400
	AT5G39775		AT5G48430
	AT5G40180		AT5G48490
	AT5G40590		AT5G48540
	AT5G40860		AT5G49480
	AT5G40990		AT5G50790
	AT5G41660		AT5G51440
	AT5G41740		AT5G51465
	AT5G41750		AT5G52320
	AT5G41761		AT5G52390
	AT5G42070		AT5G52720
	AT5G42380		AT5G52740
	AT5G42510		AT5G52750
	AT5G42530		AT5G52760
	AT5G42800		AT5G53040
	AT5G42830		AT5G54095
	AT5G43580		AT5G54610
	AT5G43590		AT5G55460
	AT5G43750		AT5G55570
	AT5G43860		AT5G56540
	AT5G44120		AT5G57220
	AT5G44420		AT5G57510
	AT5G44430		AT5G58770
	AT5G44565		AT5G59580
	AT5G44567		AT5G59720
	AT5G44568		AT5G59820
	AT5G44572		AT5G60900
	AT5G44575		AT5G61610
	AT5G44580		AT5G61890
	AT5G44585		AT5G62140
	AT5G44820		AT5G62520
	AT5G44910		AT5G63250
	AT5G44990		AT5G63270
	AT5G45095		AT5G64000
	AT5G45570		AT5G64120
	AT5G46050		AT5G64810
	AT5G46230		AT5G64850
	AT5G46350		AT5G64905
	AT5G47130		AT5G64990
	AT5G47260		AT5G65600
	AT5G47280		AT5G66640
	AT5G47330
	AT5G47850
	AT5G48400
	AT5G48430
	AT5G48540
	AT5G48657
	AT5G49480
	AT5G49520
	AT5G50790
	AT5G51440
	AT5G51465
	AT5G52320
	AT5G52390
	AT5G52720
	AT5G52740
	AT5G52750
	AT5G52760
	AT5G53040
	AT5G53250
	AT5G54095
	AT5G54160
	AT5G54610
	AT5G54710
	AT5G55460
	AT5G55570
	AT5G57220
	AT5G57345
	AT5G58770
	AT5G59750
	AT5G60900
	AT5G61890
	AT5G62140
	AT5G62430
	AT5G62520
	AT5G62920
	AT5G63250
	AT5G64000
	AT5G64120
	AT5G64170
	AT5G64810
	AT5G64850
	AT5G64890
	AT5G64905
	AT5G64990
	AT5G66640
	AT5G67300
	AT5G67370
	AT5G67450
