# Supplementary material for: A new role for histone demethylases in the maintenance of plant genome integrity
Source: eLife journal article supplement (doi:10.7554/elife.58533), 2020-10-27
Supplement: supp [file elife-58533-supp-v1.zip › elife_poa_e58533_Supplementary_file_2.xlsx]

## Sheet: Sheet1
New TE insertion sites predicted by epiTEome in the A5.B1.3.B1 line.
Chromosome	TSD Start site	TSD Stop site	Fam	ref6-5	elf6-C	elf6-C/ref6-5	F1_male	F1_female	A5.B1.3.B1
Chr1	20282613	20282613	ATENSPM3	0	0	0	0	0	+
Chr2	3593002	3593006	ATHILA	0	0	0	0	+	+
Chr2	13500366	13500368	ATENSPM3	0	0	0	0	0	+
Chr3	3551791	3551793	ATENSPM3	0	0	0	0	0	+
Chr3	19135285	19135287	ATENSPM3	0	0	0	0	0	+
Chr5	3405319	3405322	ATENSPM3	0	0	0	0	0	+
Chr5	8442266	8442268	ATENSPM3	0	0	0	0	0	+
Chr5	8514674	8514676	ATENSPM3	0	0	0	0	0	+
Chr5	11893416	11893419	VANDAL21	+	+	0	+	+	+
Chr5	16711807	16711809	ATENSPM3	0	0	0	0	0	+
Chr5	18760812	18760814	ATENSPM3	0	0	0	0	0	+
