# Supplementary material for: A new role for histone demethylases in the maintenance of plant genome integrity
Source: eLife journal article supplement (doi:10.7554/elife.58533), 2020-10-27
Supplement: supp [file elife-58533-supp-v1.zip › elife_poa_e58533_Supplementary_file_3.xlsx]

## Sheet: Sheet1
Primers used for the experiment
Gene	Primers	Sequence (5’->3’)
ELF6	CRISPR_ELF6.FOR	CATTGGCACCTGTGTTTAGACCTAC
	CRISPR_ELF6.REV	TCCACGAACTGTTGGAGAGCTTCCA
REF6	GABI_705E03.LP	AGATTGTAGCTTCTTCAATGATTGG
REF6 and REF6 T-DNA	GABI_705E03.RP	AACAACATATTTCCTCTGTCTGGAC
REF6 T-DNA	GABI o8409	ATATTGACCATCATACTCATTGC
TE insertion at Chr3 3551791-3551793	P1	GTCAAAGGCAAGGAGCACGAAGTA
	P2	GATATTTGTTGTAGTGTTTCCAAA
	P3	TTATGGTTATTCGAAGAATCACTT
TE insertion at Chr5 3405319-3405322	P4	AGAACACAAGATGATGATGATGAA
	P5	TATTTGTTGTAGTGTATTTATGCT
	P6	CTGGTTAGTGAAACCAATGGAATA
AtTT4	P7	TACCCAAGTTGGTGTATACTATA
	P8	CAGATAGAAGGCAAGCGTTCTGT
CACTA1	AtCACTA-1R	GCTGGAGAATGTGGCGGCGGAGAAT
