# Supplementary material for: A new role for histone demethylases in the maintenance of plant genome integrity
Source: eLife journal article supplement (doi:10.7554/elife.58533), 2020-10-27
Supplement: supp [file elife-58533-supp-v1.zip › elife_poa_e58533_Supplementary_file_4.xlsx]

## Sheet:  lists of H3K27me3 marked genes
	Col0 H3K27me3 marked genes					elf6 H3K27me3 marked genes					ref6 H3K27me3 marked genes					ref6 elf6 H3K27me3 marked genes					Col0 H3K27me1 marked genes						elf6 H3K27me1 marked genes						ref6 H3K27me1 marked genes						ref6 elf6 H3K27me1 marked genes
	Chr	Start	End	gene name		Chr	Start	End	gene name		Chr	Start	End	gene name		Chr	Start	End	gene name		Chr	Start	End	gene name			Chr	Start	End	gene name			Chr	Start	End	gene name			Chr	Start	End	gene name
	Chr1	6788	9130	AT1G01020		Chr1	11101	11372	AT1G03987		Chr1	3631	5899	AT1G01010		Chr1	3631	5899	AT1G01010		Chr5	3252966	3253364	AT5G10340			Chr5	21506838	21508025	AT5G53040			Chr5	3252967	3253351	AT5G10340			Chr3	7103590	7104684	AT3G20362
	Chr1	11101	11372	AT1G03987		Chr1	11649	13714	AT1G01030		Chr1	11101	11372	AT1G03987		Chr1	11101	11372	AT1G03987		Chr1	25750771	25752095	AT1G08997			Chr5	3252974	3253338	AT5G10340			Chr3	7103619	7104684	AT3G20362			Chr5	3252971	3253344	AT5G10340
	Chr1	11649	13714	AT1G01030		Chr1	38444	41017	AT1G01070		Chr1	11649	13714	AT1G01030		Chr1	11649	13714	AT1G01030		Chr5	17196631	17197519	AT5G42895			Chr2	7190549	7194193	AT2G16586			Chr5	17196602	17197546	AT5G42895			Chr5	17196552	17197581	AT5G42895
	Chr1	38444	41017	AT1G01070		Chr1	43087	43295	AT1G04003		Chr1	38444	41017	AT1G01070		Chr1	38444	41017	AT1G01070		Chr5	20977748	20979518	AT5G51650			Chr3	7103666	7104678	AT3G20362			Chr1	25750757	25751979	AT1G08997			Chr1	25750770	25752029	AT1G08997
	Chr1	43087	43295	AT1G04003		Chr1	77537	80345	AT1G08765		Chr1	43087	43295	AT1G04003		Chr1	69911	72138	AT1G01150		Chr4	6860033	6861591	AT4G11270			Chr1	15081928	15086005	AT1G40104			Chr5	20977742	20979403	AT5G51650			Chr5	26829495	26831138	AT5G67245
	Chr1	57164	59215	AT1G01120		Chr1	78927	79037	AT1G01183		Chr1	51953	54737	AT1G01110		Chr1	77537	80345	AT1G08765		Chr1	15081932	15086008	AT1G40104			Chr5	20977870	20979248	AT5G51650			Chr2	18971578	18972971	AT2G46190			Chr4	6859998	6861566	AT4G11270
	Chr1	77537	80345	AT1G08765		Chr1	82984	84946	AT1G01190		Chr1	57164	59215	AT1G01120		Chr1	78927	79037	AT1G01183		Chr1	17961070	17962290	AT1G07493			Chr2	9528844	9530275	AT2G22440			Chr1	11478929	11479750	AT1G31960			Chr1	28788147	28789694	AT1G09905
	Chr1	78927	79037	AT1G01183		Chr1	86486	88409	AT1G01200		Chr1	69911	72138	AT1G01150		Chr1	82984	84946	AT1G01190		Chr3	5727802	5730405	AT3G16820			Chr5	17196709	17197500	AT5G42895			Chr2	16833678	16835896	AT2G40310			Chr5	19700284	19701434	AT5G48595
	Chr1	82984	84946	AT1G01190		Chr1	104440	105330	AT1G01250		Chr1	77537	80345	AT1G08765		Chr1	86486	88409	AT1G01200		Chr2	13559920	13560577	AT2G31900			Chr1	27341036	27341794	AT1G72620			Chr4	6860045	6861580	AT4G11270			Chr5	17617018	17619393	AT5G43822
	Chr1	86486	88409	AT1G01200		Chr1	112263	113947	AT1G01280		Chr1	78927	79037	AT1G01183		Chr1	104440	105330	AT1G01250		Chr1	27341031	27342162	AT1G72620			Chr5	9486645	9487727	AT5G26970			Chr2	9528786	9530305	AT2G22440			Chr1	6074234	6075636	AT1G17665
	Chr1	104440	105330	AT1G01250		Chr1	132270	135924	AT1G01340		Chr1	82984	84946	AT1G01190		Chr1	132270	135924	AT1G01340		Chr2	9528820	9530336	AT2G22440			Chr5	3545187	3546058	AT5G11140			Chr1	15081936	15086002	AT1G40104			Chr3	7599378	7601428	AT3G21570
	Chr1	112263	113947	AT1G01280		Chr1	138489	139680	AT1G01355		Chr1	86486	88409	AT1G01200		Chr1	138489	139680	AT1G01355		Chr5	9486527	9487831	AT5G26970			Chr3	5727864	5730378	AT3G16820			Chr1	9564161	9565784	AT1G27535			Chr5	26606814	26608667	AT5G66658
	Chr1	138489	139680	AT1G01355		Chr1	148013	149848	AT1G01390		Chr1	104440	105330	AT1G01250		Chr1	148013	149848	AT1G01390		Chr1	291863	292741	AT1G04063			Chr5	19542806	19544635	AT5G48190			Chr5	9486542	9488121	AT5G26970			Chr5	24001474	24003414	AT5G59560
	Chr1	148013	149848	AT1G01390		Chr1	150689	152210	AT1G01400		Chr1	112263	113947	AT1G01280		Chr1	148013	149848	AT1G01390		Chr5	23390721	23391789	AT5G57720			Chr3	7507290	7509522	AT3G21330			Chr4	9215661	9217831	AT4G16295			Chr1	15081931	15086003	AT1G40104
	Chr1	150689	152210	AT1G01400		Chr1	153113	154198	AT1G01410		Chr1	132270	135924	AT1G01340		Chr1	150689	152210	AT1G01400		Chr4	5782384	5783752	AT4G09012			Chr5	723679	726442	AT5G03090			Chr3	5727803	5730399	AT3G16820			Chr1	9564108	9565953	AT1G27535
	Chr1	153113	154198	AT1G01410		Chr1	154367	156178	AT1G01420		Chr1	138489	139680	AT1G01355		Chr1	153113	154198	AT1G01410		Chr5	3545108	3545995	AT5G11140			Chr1	18386340	18387501	AT1G49680			Chr5	723667	726534	AT5G03090			Chr1	2586443	2588466	AT1G08230
	Chr1	154367	156178	AT1G01420		Chr1	154367	156178	AT1G01420		Chr1	148013	149848	AT1G01390		Chr1	166589	168088	AT1G01453		Chr3	7600141	7601562	AT3G21570			Chr3	2360723	2363056	AT3G07380			Chr5	18170018	18172274	AT5G45020			Chr3	8751886	8753677	AT3G00430
	Chr1	166589	168088	AT1G01453		Chr1	166589	168088	AT1G01453		Chr1	150689	152210	AT1G01400		Chr1	168559	171386	AT1G01460		Chr2	2330220	2332198	AT2G06002			Chr1	3342586	3345698	AT1G10190			Chr3	7600136	7601585	AT3G21570			Chr4	9111149	9113600	AT4G16110
	Chr1	168559	171386	AT1G01460		Chr1	168559	171386	AT1G01460		Chr1	153113	154198	AT1G01410		Chr1	171525	172948	AT1G01470		Chr2	16833571	16835964	AT2G40310			Chr4	2430363	2432112	AT4G04775			Chr3	2360739	2363623	AT3G07380			Chr5	9486568	9488133	AT5G26970
	Chr1	171525	172948	AT1G01470		Chr1	208995	213082	AT1G01580		Chr1	154367	156178	AT1G01420		Chr1	202103	204440	AT1G01560		Chr1	9564111	9565876	AT1G27535			Chr2	18971632	18972896	AT2G46190			Chr5	21506896	21507986	AT5G53040			Chr5	21506888	21508081	AT5G53040
	Chr1	175706	178406	AT1G01480		Chr1	208995	213082	AT1G01580		Chr1	166589	168088	AT1G01453		Chr1	208995	213082	AT1G01580		Chr5	723652	726610	AT5G03090			Chr3	7600177	7601939	AT3G21570			Chr2	15566318	15568067	AT2G08850			Chr3	20538709	20540629	AT3G55400
	Chr1	208995	213082	AT1G01580		Chr1	214150	217734	AT1G01590		Chr1	168559	171386	AT1G01460		Chr1	214150	217734	AT1G01590		Chr3	7506804	7509243	AT3G21330			Chr5	23483548	23484870	AT5G58010			Chr1	28788557	28789578	AT1G09905			Chr5	9259198	9262398	AT5G26570
	Chr1	214150	217734	AT1G01590		Chr1	246262	248440	AT1G01680		Chr1	171525	172948	AT1G01470		Chr1	218834	221286	AT1G01600		Chr5	24655072	24656887	AT5G61320			Chr1	27573080	27575053	AT1G73340			Chr5	6981713	6983757	AT5G20635			Chr2	18971048	18973003	AT2G46190
	Chr1	246262	248440	AT1G01680		Chr1	242713	246054	AT1G01670		Chr1	175706	178406	AT1G01480		Chr1	218834	221286	AT1G01600		Chr4	16555189	16556537	AT4G34690			Chr1	8771829	8775680	AT1G24807			Chr3	20726231	20729198	AT3G55860			Chr5	20575515	20577283	AT5G50550
	Chr1	242713	246054	AT1G01670		Chr1	254830	257582	AT1G08775		Chr1	202103	204440	AT1G01560		Chr1	221642	224351	AT1G01610		Chr2	18971575	18973042	AT2G46190			Chr2	15595086	15597430	AT2G37125			Chr1	3342606	3345700	AT1G10190			Chr3	3835408	3838950	AT3G12040
	Chr1	254830	257582	AT1G08775		Chr1	310169	313130	AT1G01900		Chr1	208995	213082	AT1G01580		Chr1	230908	232630	AT1G01640		Chr1	22824400	22826429	AT1G61800			Chr3	229229	231446	AT3G01600			Chr3	19959200	19960889	AT3G53910			Chr1	10505759	10507443	AT1G29980
	Chr1	310169	313130	AT1G01900		Chr1	311828	312884	AT1G04077		Chr1	214150	217734	AT1G01590		Chr1	239841	242703	AT1G01660		Chr5	19700311	19701449	AT5G48595			Chr5	24655099	24656886	AT5G61320			Chr5	19542726	19544631	AT5G48190			Chr3	2988330	2990566	AT3G09740
	Chr1	311828	312884	AT1G04077		Chr1	310169	313130	AT1G01900		Chr1	218834	221286	AT1G01600		Chr1	246262	248440	AT1G01680		Chr5	16870068	16872112	AT5G42210			Chr5	25551120	25553411	AT5G63850			Chr3	17681912	17684137	AT3G47920			Chr3	17681923	17684128	AT3G47920
	Chr1	310169	313130	AT1G01900		Chr1	340108	342040	AT1G01980		Chr1	218834	221286	AT1G01600		Chr1	242713	246054	AT1G01670		Chr4	16917441	16918847	AT4G35680			Chr4	16917730	16918822	AT4G35680			Chr5	8956190	8958402	AT5G25754			Chr1	24082259	24083578	AT1G64795
	Chr1	357906	359078	AT1G02040		Chr1	357906	359078	AT1G02040		Chr1	221642	224351	AT1G01610		Chr1	254830	257582	AT1G08775		Chr1	17332280	17334231	AT1G47280			Chr5	8956148	8958459	AT5G25754			Chr5	8956190	8958402	AT5G00470			Chr1	24082259	24083578	AT1G64790
	Chr1	365165	367443	AT1G02065		Chr1	359117	360746	AT1G02050		Chr1	230908	232630	AT1G01640		Chr1	311828	312884	AT1G04077		Chr3	2360650	2363803	AT3G07380			Chr5	8956148	8958459	AT5G00470			Chr1	291888	292690	AT1G04063			Chr3	19959191	19960784	AT3G53910
	Chr1	366945	367166	AT1G02067		Chr1	365165	367443	AT1G02065		Chr1	239841	242703	AT1G01660		Chr1	310169	313130	AT1G01900		Chr3	2360650	2363803	AT3G00250			Chr5	15662751	15663352	AT5G39120			Chr4	5782390	5783793	AT4G09012			Chr1	29319387	29320620	AT1G77990
	Chr1	370195	371090	AT1G02070		Chr1	366945	367166	AT1G02067		Chr1	246262	248440	AT1G01680		Chr1	340108	342040	AT1G01980		Chr3	6366046	6368670	AT3G18524			Chr3	20726445	20729046	AT3G55860			Chr1	17332324	17334317	AT1G47280			Chr4	7592125	7593897	AT4G05995
	Chr1	415074	418027	AT1G02190		Chr1	370195	371090	AT1G02070		Chr1	242713	246054	AT1G01670		Chr1	355124	357258	AT1G02030		Chr2	7190437	7194370	AT2G16586			Chr1	1993698	1996174	AT1G06520			Chr4	2430323	2432118	AT4G04775			Chr3	9995732	9997498	AT3G27100
	Chr1	418416	422579	AT1G02205		Chr1	415074	418027	AT1G02190		Chr1	254830	257582	AT1G08775		Chr1	357906	359078	AT1G02040		Chr3	105430	106147	AT3G00990			Chr3	2921690	2923256	AT3G09510			Chr5	26606835	26608731	AT5G66658			Chr1	23552461	23554737	AT1G63490
	Chr1	427548	427811	AT1G02210		Chr1	418416	422579	AT1G02205		Chr1	311828	312884	AT1G04077		Chr1	359117	360746	AT1G02050		Chr5	8956225	8958698	AT5G25754			Chr3	17681936	17684066	AT3G47920			Chr2	2330235	2332096	AT2G06002			Chr5	1180548	1183236	AT5G04270
	Chr1	459122	461921	AT1G04103		Chr1	459122	461921	AT1G04103		Chr1	310169	313130	AT1G01900		Chr1	365165	367443	AT1G02065		Chr5	8956225	8958698	AT5G00470			Chr1	23683359	23684197	AT1G63820			Chr2	19070796	19072054	AT2G46460			Chr2	13023883	13025437	AT2G30575
	Chr1	458133	460831	AT1G02310		Chr1	458133	460831	AT1G02310		Chr1	340108	342040	AT1G01980		Chr1	366945	367166	AT1G02067		Chr5	1180326	1183260	AT5G04270			Chr1	6657340	6660576	AT1G19260			Chr2	19070796	19072054	AT2G46455			Chr3	2360710	2363688	AT3G07380
	Chr1	463754	464981	AT1G02335		Chr1	463754	464981	AT1G02335		Chr1	355124	357258	AT1G02030		Chr1	370195	371090	AT1G02070		Chr4	14250072	14250949	AT4G28870			Chr3	8936645	8938734	AT3G24514			Chr5	19700316	19701426	AT5G48595			Chr5	19542691	19544750	AT5G48190
	Chr1	465616	467880	AT1G02340		Chr1	465616	467880	AT1G02340		Chr1	357906	359078	AT1G02040		Chr1	415074	418027	AT1G02190		Chr5	947160	947911	AT5G03668			Chr3	8936645	8938734	AT3G24517			Chr1	17758859	17761407	AT1G48095			Chr5	3943911	3946993	AT5G12200
	Chr1	471883	473336	AT1G02360		Chr1	471883	473336	AT1G02360		Chr1	359117	360746	AT1G02050		Chr1	418416	422579	AT1G02205		Chr5	947160	947911	AT5G03670			Chr3	8936645	8938734	AT3G24518			Chr4	7592110	7593880	AT4G05995			Chr3	10320320	10322153	AT3G27835
	Chr1	480650	483373	AT1G02390		Chr1	480650	483373	AT1G02390		Chr1	365165	367443	AT1G02065		Chr1	427548	427811	AT1G02210		Chr3	17681992	17684102	AT3G47920			Chr3	22847473	22850582	AT3G61730			Chr3	8751928	8753774	AT3G00430			Chr5	21529930	21532010	AT5G53110
	Chr1	486800	489651	AT1G02400		Chr1	486800	489651	AT1G02400		Chr1	366945	367166	AT1G02067		Chr1	428650	430720	AT1G02220		Chr2	15566424	15568086	AT2G08850			Chr1	3875572	3877187	AT1G11540			Chr3	8751928	8753774	AT3G24210			Chr1	25720881	25723756	AT1G68540
	Chr1	486800	489651	AT1G02400		Chr1	489874	490627	AT1G02405		Chr1	370195	371090	AT1G02070		Chr1	434965	436922	AT1G02230		Chr5	19542727	19544828	AT5G48190			Chr1	5615806	5618737	AT1G16440			Chr1	29769057	29770601	AT1G09847			Chr4	16555382	16556558	AT4G34690
	Chr1	489874	490627	AT1G02405		Chr1	496372	497555	AT1G02440		Chr1	415074	418027	AT1G02190		Chr1	437860	439559	AT1G02250		Chr1	3342566	3345859	AT1G10190			Chr1	5615806	5618737	AT1G16445			Chr1	29769057	29770601	AT1G09853			Chr3	5621890	5624301	AT3G16525
	Chr1	497917	498539	AT1G02450		Chr1	497917	498539	AT1G02450		Chr1	418416	422579	AT1G02205		Chr1	440200	442972	AT1G02260		Chr3	19959217	19960635	AT3G53910			Chr4	13901192	13903298	AT4G27920			Chr2	7190458	7194376	AT2G16586			Chr5	18168738	18172810	AT5G45020
	Chr1	504463	507268	AT1G02460		Chr1	504463	507268	AT1G02460		Chr1	424479	425189	AT1G08785		Chr1	459122	461921	AT1G04103		Chr1	1993804	1996343	AT1G06520			Chr2	13092566	13094683	AT2G30730			Chr5	21529837	21532024	AT5G53110			Chr1	17299369	17301119	AT1G47210
	Chr1	536483	537211	AT1G02550		Chr1	504463	507268	AT1G02460		Chr1	424666	425164	AT1G04093		Chr1	458133	460831	AT1G02310		Chr5	23483476	23485219	AT5G58010			Chr1	8823032	8826995	AT1G25155			Chr1	13042589	13044137	AT1G06897			Chr1	17332280	17334272	AT1G47280
	Chr1	543011	544057	AT1G02575		Chr1	534827	535699	AT1G02540		Chr1	427548	427811	AT1G02210		Chr1	463754	464981	AT1G02335		Chr1	5615847	5617584	AT1G16440			Chr1	8808667	8812507	AT1G25083			Chr5	20802430	20804599	AT5G51195			Chr1	21080580	21083477	AT1G56310
	Chr1	544733	549202	AT1G02580		Chr1	536483	537211	AT1G02550		Chr1	428650	430720	AT1G02220		Chr1	465616	467880	AT1G02340		Chr1	3979624	3981040	AT1G11785			Chr1	8808667	8812507	AT1G25097			Chr5	24115566	24118802	AT5G59870			Chr5	20976870	20979436	AT5G51640
	Chr1	551002	551636	AT1G08805		Chr1	543011	544057	AT1G02575		Chr1	434965	436922	AT1G02230		Chr1	469818	470693	AT1G02350		Chr1	3484614	3486515	AT1G10560			Chr4	12004904	12006065	AT4G22880			Chr2	15595054	15597514	AT2G37125			Chr5	20976870	20979436	AT5G51650
	Chr1	551289	551529	AT1G04127		Chr1	544733	549202	AT1G02580		Chr1	437860	439559	AT1G02250		Chr1	471127	471498	AT1G04107		Chr1	26993877	26994892	AT1G71770			Chr3	3401458	3402701	AT3G10870			Chr2	13559917	13560583	AT2G31900			Chr5	23322133	23323664	AT5G57590
	Chr1	557092	558774	AT1G02620		Chr1	551002	551636	AT1G08805		Chr1	440200	442972	AT1G02260		Chr1	471883	473336	AT1G02360		Chr1	5862893	5863495	AT1G17147			Chr1	6282360	6282941	AT1G18265			Chr4	14250028	14250947	AT4G28870			Chr1	21600684	21603587	AT1G58250
	Chr1	558071	558492	AT1G04133		Chr1	551289	551529	AT1G04127		Chr1	459122	461921	AT1G04103		Chr1	476945	479112	AT1G02380		Chr4	1371429	1375038	AT4G03100			Chr3	9378682	9381317	AT3G25720			Chr4	16555156	16556542	AT4G34690			Chr4	13536523	13539345	AT4G26960
	Chr1	583471	583860	AT1G04143		Chr1	557092	558774	AT1G02620		Chr1	458133	460831	AT1G02310		Chr1	480650	483373	AT1G02390		Chr4	10521313	10522888	AT4G19230			Chr1	22824427	22825704	AT1G61800			Chr3	5451593	5454569	AT3G16070			Chr3	18254805	18255840	AT3G49230
	Chr1	604873	606708	AT1G02770		Chr1	558071	558492	AT1G04133		Chr1	463754	464981	AT1G02335		Chr1	486800	489651	AT1G02400		Chr1	10505736	10507423	AT1G29980			Chr5	2675844	2676622	AT5G08315			Chr4	13536498	13539361	AT4G26960			Chr2	17406665	17408882	AT2G41720
	Chr1	610363	612324	AT1G02790		Chr1	583471	583860	AT1G04143		Chr1	465616	467880	AT1G02340		Chr1	497917	498539	AT1G02450		Chr1	23682506	23684266	AT1G63820			Chr5	18169473	18172238	AT5G45020			Chr1	29318731	29320549	AT1G77990			Chr3	18746572	18748645	AT3G50520
	Chr1	613197	616231	AT1G02800		Chr1	604873	606708	AT1G02770		Chr1	469818	470693	AT1G02350		Chr1	504463	507268	AT1G02460		Chr1	3085684	3088425	AT1G09540			Chr3	19959273	19960627	AT3G53910			Chr1	24082262	24083609	AT1G64795			Chr3	9470713	9472339	AT3G25882
	Chr1	618061	620502	AT1G02810		Chr1	610363	612324	AT1G02790		Chr1	471127	471498	AT1G04107		Chr1	504463	507268	AT1G02460		Chr4	2430316	2432130	AT4G04775			Chr3	20259120	20260457	AT3G54730			Chr1	24082262	24083609	AT1G64790			Chr4	10036691	10037858	AT4G18110
	Chr1	620678	621329	AT1G02813		Chr1	618061	620502	AT1G02810		Chr1	471883	473336	AT1G02360		Chr1	520498	521668	AT1G02510		Chr1	29208244	29210298	AT1G09945			Chr3	22160709	22162334	AT3G60000			Chr4	8705807	8707796	AT4G15242			Chr5	8956212	8958186	AT5G25754
	Chr1	662963	664290	AT1G02940		Chr1	620678	621329	AT1G02813		Chr1	476945	479112	AT1G02380		Chr1	523536	529069	AT1G02520		Chr5	26606883	26608711	AT5G66658			Chr3	8129699	8133082	AT3G22935			Chr4	8705807	8707796	AT4G15245			Chr5	8956212	8958186	AT5G00470
	Chr1	665119	666471	AT1G02950		Chr1	662963	664290	AT1G02940		Chr1	480650	483373	AT1G02390		Chr1	523536	529069	AT1G02520		Chr3	229188	231452	AT3G01600			Chr3	8129699	8133082	AT3G22940			Chr2	13091961	13094758	AT2G30730			Chr1	291891	292690	AT1G04063
	Chr1	665354	666367	AT1G02952		Chr1	665119	666471	AT1G02950		Chr1	486800	489651	AT1G02400		Chr1	529679	534677	AT1G02530		Chr5	2675752	2676790	AT5G08315			Chr1	9155733	9159165	AT1G26480			Chr3	20259000	20260414	AT3G54730			Chr5	723683	726581	AT5G03090
	Chr1	677360	681378	AT1G02980		Chr1	665354	666367	AT1G02952		Chr1	489874	490627	AT1G02405		Chr1	529679	534677	AT1G02530		Chr4	18280143	18280881	AT4G39280			Chr1	9155733	9159165	AT1G26500			Chr5	20127569	20130279	AT5G49590			Chr3	5727828	5730378	AT3G16820
	Chr1	697919	698591	AT1G03020		Chr1	671661	672814	AT1G02965		Chr1	497917	498539	AT1G02450		Chr1	534827	535699	AT1G02540		Chr1	9156565	9159576	AT1G26480			Chr5	4987332	4989638	AT5G15360			Chr5	10018938	10021473	AT5G28000			Chr1	29769049	29770663	AT1G09847
	Chr1	747197	748057	AT1G03103		Chr1	677360	681378	AT1G02980		Chr1	504463	507268	AT1G02460		Chr1	536483	537211	AT1G02550		Chr1	9156565	9159576	AT1G26500			Chr1	7876198	7878506	AT1G22290			Chr1	20971961	20975135	AT1G56080			Chr1	29769049	29770663	AT1G09853
	Chr1	748101	749034	AT1G03106		Chr1	697919	698591	AT1G03020		Chr1	504463	507268	AT1G02460		Chr1	541236	542245	AT1G02570		Chr1	9156565	9159576	AT1G06003			Chr5	18207155	18208830	AT5G45095			Chr1	8808706	8812539	AT1G25083			Chr2	3495414	3496324	AT2G07739
	Chr1	768376	770684	AT1G03170		Chr1	747197	748057	AT1G03103		Chr1	520498	521668	AT1G02510		Chr1	543011	544057	AT1G02575		Chr3	17447488	17448910	AT3G47350			Chr5	20802537	20804569	AT5G51195			Chr1	8808706	8812539	AT1G25097			Chr5	17726220	17727796	AT5G44050
	Chr1	819612	821476	AT1G03340		Chr1	748101	749034	AT1G03106		Chr1	523536	529069	AT1G02520		Chr1	544733	549202	AT1G02580		Chr2	13319701	13321980	AT2G31250			Chr4	14026509	14028564	AT4G28350			Chr4	12570215	12572222	AT4G24240			Chr2	18702226	18703213	AT2G45380
	Chr1	842659	844251	AT1G03400		Chr1	819612	821476	AT1G03340		Chr1	529679	534677	AT1G02530		Chr1	551002	551636	AT1G08805		Chr4	13901190	13903596	AT4G27920			Chr3	22568502	22570912	AT3G60990			Chr1	21729384	21732236	AT1G58525			Chr2	18702226	18703213	AT2G09610
	Chr1	854410	859701	AT1G03445		Chr1	842659	844251	AT1G03400		Chr1	534827	535699	AT1G02540		Chr1	551289	551529	AT1G04127		Chr2	14486375	14488075	AT2G34325			Chr1	29769041	29770553	AT1G09847			Chr1	21729384	21732236	AT1G58520			Chr1	5435765	5438917	AT1G15780
	Chr1	871874	872906	AT1G03490		Chr1	854410	859701	AT1G03445		Chr1	536483	537211	AT1G02550		Chr1	552138	552761	AT1G02590		Chr2	14486375	14488075	AT2G34330			Chr1	29769041	29770553	AT1G09853			Chr5	16868772	16872123	AT5G42210			Chr1	5435765	5438917	AT1G15790
	Chr1	920950	922098	AT1G03700		Chr1	871874	872906	AT1G03490		Chr1	541236	542245	AT1G02570		Chr1	557092	558774	AT1G02620		Chr2	14571685	14573913	AT2G34600			Chr1	9564331	9565575	AT1G27535			Chr1	8771771	8775684	AT1G24807			Chr1	20131154	20132942	AT1G53903
	Chr1	923390	924730	AT1G03710		Chr1	923390	924730	AT1G03710		Chr1	543011	544057	AT1G02575		Chr1	558071	558492	AT1G04133		Chr2	18603572	18605311	AT2G45120			Chr1	23880218	23881242	AT1G64340			Chr2	18702236	18703289	AT2G45380			Chr1	12262906	12266018	AT1G33810
	Chr1	924896	926373	AT1G03720		Chr1	924896	926373	AT1G03720		Chr1	544733	549202	AT1G02580		Chr1	560610	562598	AT1G02630		Chr3	7782901	7784492	AT3G22090			Chr4	6860038	6861507	AT4G11270			Chr2	18702236	18703289	AT2G09610			Chr1	1194184	1195578	AT1G04425
	Chr1	926989	927200	AT1G04207		Chr1	926989	927200	AT1G04207		Chr1	551002	551636	AT1G08805		Chr1	583471	583860	AT1G04143		Chr3	7782901	7784492	AT3G22100			Chr2	18603586	18604629	AT2G45120			Chr3	8936614	8938752	AT3G24514			Chr3	557539	558355	AT3G02610
	Chr1	954290	956144	AT1G03790		Chr1	954290	956144	AT1G03790		Chr1	551289	551529	AT1G04127		Chr1	588003	589480	AT1G02700		Chr5	21530051	21532564	AT5G53110			Chr5	5229606	5232079	AT5G16020			Chr3	8936614	8938752	AT3G24517			Chr1	3342608	3345788	AT1G10190
	Chr1	957104	958383	AT1G03800		Chr1	957104	958383	AT1G03800		Chr1	552138	552761	AT1G02590		Chr1	589584	590406	AT1G02705		Chr1	28514776	28516352	AT1G75945			Chr2	16114140	16115585	AT2G38490			Chr3	8936614	8938752	AT3G24518			Chr1	26993885	26994860	AT1G71770
	Chr1	958759	959609	AT1G03810		Chr1	958759	959609	AT1G03810		Chr1	557092	558774	AT1G02620		Chr1	589706	589996	AT1G02710		Chr2	13799068	13800003	AT2G32510			Chr5	19811542	19813187	AT5G48860			Chr1	3979753	3981038	AT1G11785			Chr4	18280136	18280869	AT4G39280
	Chr1	959790	960916	AT1G03820		Chr1	959790	960916	AT1G03820		Chr1	558071	558492	AT1G04133		Chr1	604873	606708	AT1G02770		Chr3	19023412	19024408	AT3G51230			Chr2	16832417	16835903	AT2G40300			Chr1	25720507	25723761	AT1G68540			Chr2	13633644	13635909	AT2G32040
	Chr1	967470	970334	AT1G03840		Chr1	967470	970334	AT1G03840		Chr1	560610	562598	AT1G02630		Chr1	610363	612324	AT1G02790		Chr3	22341837	22343610	AT3G60450			Chr2	16832417	16835903	AT2G40310			Chr3	8955276	8957669	AT3G24542			Chr2	7190082	7194397	AT2G16586
	Chr1	975871	977911	AT1G03850		Chr1	975871	977911	AT1G03850		Chr1	583471	583860	AT1G04143		Chr1	613197	616231	AT1G02800		Chr3	22341837	22343610	AT3G60460			Chr3	20538723	20540509	AT3G55400			Chr4	1287902	1291853	AT4G02910			Chr4	2430384	2432115	AT4G04775
	Chr1	975871	977911	AT1G03850		Chr1	985751	988146	AT1G03880		Chr1	588003	589480	AT1G02700		Chr1	618061	620502	AT1G02810		Chr4	13731340	13734146	AT4G27460			Chr1	24637468	24641286	AT1G66160			Chr2	18267753	18269083	AT2G44175			Chr3	10081118	10083071	AT3G27290
	Chr1	982381	983544	AT1G03870		Chr1	989198	991020	AT1G03890		Chr1	589584	590406	AT1G02705		Chr1	620678	621329	AT1G02813		Chr3	18254567	18255852	AT3G49230			Chr1	24637468	24641286	AT1G66170			Chr1	7023410	7024687	AT1G20280			Chr2	14631832	14633064	AT2G34690
	Chr1	985751	988146	AT1G03880		Chr1	1001116	1004410	AT1G03920		Chr1	589706	589996	AT1G02710		Chr1	623656	624567	AT1G02820		Chr5	1871227	1872889	AT5G06170			Chr1	3086256	3088165	AT1G09540			Chr2	686640	689505	AT2G02550			Chr3	19536646	19537856	AT3G52700
	Chr1	989198	991020	AT1G03890		Chr1	1022251	1023719	AT1G03982		Chr1	604873	606708	AT1G02770		Chr1	625084	625608	AT1G02830		Chr4	9451504	9453206	AT4G16790			Chr5	25633548	25635831	AT5G64060			Chr4	14977470	14980235	AT4G30740			Chr2	9528853	9531418	AT2G22440
	Chr1	1001116	1004410	AT1G03920		Chr1	1057041	1059454	AT1G04090		Chr1	610363	612324	AT1G02790		Chr1	658578	659980	AT1G02920		Chr5	25210542	25211242	AT5G62770			Chr1	17784375	17786502	AT1G48150			Chr3	2921598	2923360	AT3G09510			Chr2	9528853	9531418	AT2G22450
	Chr1	1022251	1023719	AT1G03982		Chr1	1081024	1084431	AT1G04150		Chr1	613197	616231	AT1G02800		Chr1	661088	662475	AT1G02930		Chr1	29768987	29770965	AT1G09847			Chr5	15906744	15909334	AT5G39750			Chr4	6037012	6038665	AT4G09545			Chr1	20433579	20434461	AT1G54760
	Chr1	1081024	1084431	AT1G04150		Chr1	1104493	1106241	AT1G04180		Chr1	618061	620502	AT1G02810		Chr1	662963	664290	AT1G02940		Chr1	29768987	29770965	AT1G09853			Chr5	2866338	2868870	AT5G09220			Chr1	8823088	8826958	AT1G25155			Chr4	6037122	6038799	AT4G09545
	Chr1	1104493	1106241	AT1G04180		Chr1	1119699	1122786	AT1G04220		Chr1	620678	621329	AT1G02813		Chr1	665119	666471	AT1G02950		Chr3	20726190	20729070	AT3G55860			Chr2	14080471	14082456	AT2G33230			Chr2	12753441	12755486	AT2G29920			Chr5	20607387	20610669	AT5G50640
	Chr1	1119699	1122786	AT1G04220		Chr1	1120225	1122526	AT1G04247		Chr1	623656	624567	AT1G02820		Chr1	665354	666367	AT1G02952		Chr1	27979202	27980397	AT1G74440			Chr1	13065050	13066747	AT1G35500			Chr2	12753441	12755486	AT2G29925			Chr1	16974889	16975945	AT1G44910
	Chr1	1120225	1122526	AT1G04247		Chr1	1136078	1138663	AT1G04250		Chr1	625084	625608	AT1G02830		Chr1	671661	672814	AT1G02965		Chr1	27979202	27980397	AT1G09463			Chr5	21079349	21081377	AT5G51850			Chr2	18496749	18498754	AT2G09550			Chr1	16997045	17000715	AT1G44960
	Chr1	1136078	1138663	AT1G04250		Chr1	1143436	1147091	AT1G04280		Chr1	658578	659980	AT1G02920		Chr1	677360	681378	AT1G02980		Chr5	26818938	26819806	AT5G67210			Chr4	8705879	8707668	AT4G15242			Chr2	18496749	18498754	AT2G09555			Chr2	14920721	14921791	AT2G35520
	Chr1	1143436	1147091	AT1G04280		Chr1	1161289	1161982	AT1G04330		Chr1	661088	662475	AT1G02930		Chr1	693190	696504	AT1G03010		Chr2	16114073	16116179	AT2G38490			Chr4	8705879	8707668	AT4G15245			Chr1	6657210	6660639	AT1G19260			Chr4	15922585	15924052	AT4G32990
	Chr1	1161289	1161982	AT1G04330		Chr1	1175033	1175768	AT1G04370		Chr1	662963	664290	AT1G02940		Chr1	697919	698591	AT1G03020		Chr1	20971983	20975102	AT1G56080			Chr1	4738094	4741347	AT1G13825			Chr5	9720580	9722248	AT5G27530			Chr1	193019	194065	AT1G01530
	Chr1	1175033	1175768	AT1G04370		Chr1	1206760	1207939	AT1G04445		Chr1	665119	666471	AT1G02950		Chr1	707485	710041	AT1G03050		Chr2	15595032	15597515	AT2G37125			Chr1	4738094	4741347	AT1G13830			Chr5	19811052	19813210	AT5G48860			Chr4	6669276	6672856	AT4G05835
	Chr1	1206760	1207939	AT1G04445		Chr1	1208521	1210026	AT1G04450		Chr1	665354	666367	AT1G02952		Chr1	748101	749034	AT1G03106		Chr5	2865941	2868830	AT5G09220			Chr1	11660916	11662342	AT1G32337			Chr5	18206418	18209416	AT5G45095			Chr1	18670216	18671966	AT1G50400
	Chr1	1208521	1210026	AT1G04450		Chr1	1210269	1210622	AT1G04455		Chr1	671661	672814	AT1G02965		Chr1	768376	770684	AT1G03170		Chr4	15401641	15402542	AT4G31840			Chr1	13042682	13043884	AT1G06897			Chr5	609414	612217	AT5G02700			Chr4	16792688	16795557	AT4G35290
	Chr1	1210269	1210622	AT1G04455		Chr1	1210924	1214841	AT1G04470		Chr1	677360	681378	AT1G02980		Chr1	819612	821476	AT1G03340		Chr3	22847270	22850583	AT3G61730			Chr4	15401739	15402408	AT4G31840			Chr5	18624724	18627758	AT5G45920			Chr2	15595041	15597463	AT2G37125
	Chr1	1210924	1214841	AT1G04470		Chr1	1221411	1224539	AT1G04500		Chr1	693190	696504	AT1G03010		Chr1	854410	859701	AT1G03445		Chr4	12072810	12074361	AT4G23030			Chr1	1885090	1886671	AT1G06170			Chr3	9378555	9381368	AT3G25720			Chr4	10267531	10271620	AT4G03005
	Chr1	1221411	1224539	AT1G04500		Chr1	1236754	1239199	AT1G04540		Chr1	697919	698591	AT1G03020		Chr1	860761	864372	AT1G03457		Chr1	780511	782802	AT1G03200			Chr4	15385296	15386873	AT4G31805			Chr2	14631893	14632642	AT2G34690			Chr3	21966496	21969344	AT3G59430
	Chr1	1236754	1239199	AT1G04540		Chr1	1244947	1246059	AT1G04560		Chr1	707485	710041	AT1G03050		Chr1	871874	872906	AT1G03490		Chr4	13536502	13539384	AT4G26960			Chr1	10383160	10384476	AT1G06293			Chr3	17447424	17448731	AT3G47350			Chr5	16869686	16873264	AT5G42210
	Chr1	1244947	1246059	AT1G04560		Chr1	1252005	1257893	AT1G04580		Chr1	747197	748057	AT1G03103		Chr1	911310	913808	AT1G03660		Chr2	18702205	18703278	AT2G45380			Chr1	2126559	2128180	AT1G06923			Chr3	18254818	18255842	AT3G49230			Chr5	16869686	16873264	AT5G42220
	Chr1	1261762	1272588	AT1G04600		Chr1	1261762	1272588	AT1G04600		Chr1	748101	749034	AT1G03106		Chr1	913390	913595	AT1G04203		Chr2	18702205	18703278	AT2G09610			Chr1	2126559	2128180	AT1G04533			Chr3	105450	106133	AT3G00990			Chr3	11104164	11106612	AT3G00560
	Chr1	1287831	1289820	AT1G04625		Chr1	1287831	1289820	AT1G04625		Chr1	768376	770684	AT1G03170		Chr1	914222	916222	AT1G03670		Chr5	19051648	19053377	AT5G46915			Chr1	2126559	2128180	AT1G06925			Chr3	22568484	22571413	AT3G60990			Chr5	15754297	15755627	AT5G39360
	Chr1	1299553	1299796	AT1G04283		Chr1	1300368	1301773	AT1G04660		Chr1	819612	821476	AT1G03340		Chr1	923390	924730	AT1G03710		Chr5	24002079	24004728	AT5G59570			Chr2	13318578	13321587	AT2G31240			Chr3	11104209	11105984	AT3G00560			Chr1	23422612	23425092	AT1G63160
	Chr1	1300368	1301773	AT1G04660		Chr1	1301829	1302758	AT1G04670		Chr1	854410	859701	AT1G03445		Chr1	924896	926373	AT1G03720		Chr1	28390657	28393561	AT1G75600			Chr2	13318578	13321587	AT2G31250			Chr5	1410207	1413882	AT5G04860			Chr2	11692381	11694742	AT2G27320
	Chr1	1301829	1302758	AT1G04670		Chr1	1380382	1382599	AT1G04890		Chr1	860761	864372	AT1G03457		Chr1	926989	927200	AT1G04207		Chr2	15104766	15105858	AT2G35950			Chr1	28359376	28361776	AT1G75530			Chr2	793821	796455	AT2G02800			Chr4	1288059	1291876	AT4G02910
	Chr1	1375824	1379228	AT1G04880		Chr1	1459091	1460579	AT1G05080		Chr1	871874	872906	AT1G03490		Chr1	954290	956144	AT1G03790		Chr2	8647774	8649032	AT2G20030			Chr2	14486511	14488075	AT2G34325			Chr2	793821	796455	AT2G02795			Chr4	14250020	14250998	AT4G28870
	Chr1	1380382	1382599	AT1G04890		Chr1	1460988	1461670	AT1G05085		Chr1	911310	913808	AT1G03660		Chr1	957104	958383	AT1G03800		Chr5	21079221	21081400	AT5G51850			Chr2	14486511	14488075	AT2G34330			Chr3	16839631	16840569	AT3G45820			Chr3	8955841	8957643	AT3G24542
	Chr1	1459091	1460579	AT1G05080		Chr1	1480118	1480940	AT1G08865		Chr1	913390	913595	AT1G04203		Chr1	958759	959609	AT1G03810		Chr2	15157820	15159269	AT2G36090			Chr4	14250103	14250905	AT4G28870			Chr3	8129726	8133506	AT3G22940			Chr1	29839815	29842120	AT1G79330
	Chr1	1460988	1461670	AT1G05085		Chr1	1512896	1518900	AT1G05230		Chr1	914222	916222	AT1G03670		Chr1	959790	960916	AT1G03820		Chr1	3875643	3877770	AT1G11540			Chr3	1795320	1796530	AT3G05980			Chr4	13901262	13903504	AT4G27920			Chr1	29839815	29842120	AT1G09985
	Chr1	1480118	1480940	AT1G08865		Chr1	1529767	1531484	AT1G05260		Chr1	920950	922098	AT1G03700		Chr1	967470	970334	AT1G03840		Chr5	19811475	19813216	AT5G48860			Chr3	15954364	15957236	AT3G44265			Chr5	9768396	9771175	AT5G27610			Chr5	16848902	16849804	AT5G42170
	Chr1	1512896	1518900	AT1G05230		Chr1	1534830	1537602	AT1G05280		Chr1	923390	924730	AT1G03710		Chr1	975871	977911	AT1G03850		Chr5	584881	586817	AT5G02600			Chr4	9215692	9217782	AT4G16295			Chr2	10367659	10371117	AT2G24370			Chr2	17416225	17419470	AT2G41740
	Chr1	1529767	1531484	AT1G05260		Chr1	1538273	1538484	AT1G04373		Chr1	924896	926373	AT1G03720		Chr1	985751	988146	AT1G03880		Chr1	19666351	19668797	AT1G52810			Chr3	8956173	8957468	AT3G24542			Chr4	14530855	14533148	AT4G29654			Chr5	8744549	8747112	AT5G25240
	Chr1	1531641	1534767	AT1G05270		Chr1	1541348	1542432	AT1G05291		Chr1	926989	927200	AT1G04207		Chr1	989198	991020	AT1G03890		Chr5	1624532	1626121	AT5G05490			Chr3	8295305	8296352	AT3G23240			Chr3	129164	130639	AT3G01345			Chr5	21174122	21176231	AT5G52115
	Chr1	1534830	1537602	AT1G05280		Chr1	1542969	1543287	AT1G04377		Chr1	954290	956144	AT1G03790		Chr1	1001116	1004410	AT1G03920		Chr2	3494827	3496334	AT2G07739			Chr3	3885801	3886942	AT3G12190			Chr1	17812277	17814384	AT1G48260			Chr1	11478663	11481564	AT1G31970
	Chr1	1538273	1538484	AT1G04373		Chr1	1543157	1543394	AT1G04383		Chr1	957104	958383	AT1G03800		Chr1	1019311	1022108	AT1G03980		Chr1	202154	204238	AT1G01560			Chr1	12152617	12155440	AT1G33500			Chr5	6913495	6915809	AT5G20460			Chr1	20031335	20033715	AT1G53655
	Chr1	1541348	1542432	AT1G05291		Chr1	1543643	1544093	AT1G04387		Chr1	958759	959609	AT1G03810		Chr1	1022251	1023719	AT1G03982		Chr4	11517601	11519785	AT4G21680			Chr1	29208291	29210237	AT1G09945			Chr1	17431029	17431933	AT1G47497			Chr5	25934576	25936640	AT5G64890
	Chr1	1542969	1543287	AT1G04377		Chr1	1539152	1540562	AT1G05290		Chr1	959790	960916	AT1G03820		Chr1	1024740	1027616	AT1G03990		Chr5	513413	514867	AT5G02400			Chr2	2330266	2332126	AT2G06002			Chr2	16020550	16024447	AT2G38255			Chr5	14522422	14525693	AT5G36870
	Chr1	1543157	1543394	AT1G04383		Chr1	1544927	1547849	AT1G05300		Chr1	967470	970334	AT1G03840		Chr1	1057041	1059454	AT1G04090		Chr1	2194813	2195752	AT1G07150			Chr1	28648894	28650775	AT1G76370			Chr4	18280131	18280911	AT4G39280			Chr2	16832484	16835967	AT2G40300
	Chr1	1543643	1544093	AT1G04387		Chr1	1550503	1552587	AT1G05310		Chr1	975871	977911	AT1G03850		Chr1	1059470	1061209	AT1G04100		Chr2	18591632	18592428	AT2G45080			Chr4	10521437	10522617	AT4G19230			Chr5	8361842	8365311	AT5G24480			Chr2	16832484	16835967	AT2G40310
	Chr1	1539152	1540562	AT1G05290		Chr1	1569147	1572469	AT1G05370		Chr1	975871	977911	AT1G03850		Chr1	1059730	1060348	AT1G04105		Chr3	3401377	3402925	AT3G10870			Chr1	11957690	11960987	AT1G33010			Chr5	18010230	18012859	AT5G44640			Chr3	20726241	20729101	AT3G55860
	Chr1	1544927	1547849	AT1G05300		Chr1	1584073	1585421	AT1G05400		Chr1	985751	988146	AT1G03880		Chr1	1061297	1063809	AT1G04110		Chr3	2520699	2522516	AT3G07900			Chr3	21258664	21260350	AT3G57440			Chr1	20979803	20982851	AT1G56100			Chr3	9120202	9121103	AT3G25030
	Chr1	1550503	1552587	AT1G05310		Chr1	1589973	1591012	AT1G05420		Chr1	989198	991020	AT1G03890		Chr1	1081024	1084431	AT1G04150		Chr5	14238247	14239456	AT5G36180			Chr5	22418565	22420621	AT5G55260			Chr2	5589377	5592467	AT2G13430			Chr2	1708043	1711337	AT2G04860
	Chr1	1569147	1572469	AT1G05370		Chr1	1599876	1601214	AT1G05450		Chr1	1001116	1004410	AT1G03920		Chr1	1104493	1106241	AT1G04180		Chr3	237216	238861	AT3G01630			Chr5	22418565	22420621	AT5G55270			Chr1	11957750	11961170	AT1G33010			Chr4	7650594	7653256	AT4G13150
	Chr1	1584073	1585421	AT1G05400		Chr1	1629446	1630863	AT1G05510		Chr1	1019311	1022108	AT1G03980		Chr1	1114375	1119739	AT1G04210		Chr1	23173397	23176356	AT1G62580			Chr1	19666379	19668715	AT1G52810			Chr2	3494444	3496331	AT2G07739			Chr1	17758901	17761343	AT1G48095
	Chr1	1589973	1591012	AT1G05420		Chr1	1639223	1640879	AT1G05540		Chr1	1022251	1023719	AT1G03982		Chr1	1114375	1119739	AT1G04210		Chr1	1167467	1168862	AT1G04360			Chr2	6044135	6047619	AT2G14265			Chr1	9175244	9177999	AT1G26558			Chr3	18502220	18504052	AT3G49900
	Chr1	1599876	1601214	AT1G05450		Chr1	1640959	1643917	AT1G05550		Chr1	1057041	1059454	AT1G04090		Chr1	1119699	1122786	AT1G04220		Chr5	24115502	24118674	AT5G59870			Chr5	21118765	21121271	AT5G52000			Chr3	20348851	20350667	AT3G54925			Chr5	1871353	1873643	AT5G06180
	Chr1	1629446	1630863	AT1G05510		Chr1	1640959	1643917	AT1G05550		Chr1	1059470	1061209	AT1G04100		Chr1	1120225	1122526	AT1G04247		Chr5	20802460	20804618	AT5G51195			Chr1	29511795	29513137	AT1G78440			Chr3	20348851	20350667	AT3G08445			Chr1	23173378	23176359	AT1G62580
	Chr1	1639223	1640879	AT1G05540		Chr1	1662352	1664398	AT1G05577		Chr1	1059730	1060348	AT1G04105		Chr1	1136078	1138663	AT1G04250		Chr4	16694199	16695544	AT4G35070			Chr2	12289727	12290968	AT2G28650			Chr1	12361782	12366189	AT1G34015			Chr1	7136965	7139395	AT1G20610
	Chr1	1640959	1643917	AT1G05550		Chr1	1665356	1668924	AT1G05580		Chr1	1061297	1063809	AT1G04110		Chr1	1140278	1141564	AT1G04260		Chr5	2932109	2933202	AT5G09430			Chr2	1086	10354	AT2G01008			Chr2	14062742	14063589	AT2G33175			Chr1	29577677	29578526	AT1G78630
	Chr1	1662352	1664398	AT1G05577		Chr1	1677507	1678270	AT1G05615		Chr1	1081024	1084431	AT1G04150		Chr1	1161289	1161982	AT1G04330		Chr5	1035836	1037046	AT5G03870			Chr2	11135726	11136931	AT2G26150			Chr4	10036683	10037809	AT4G18110			Chr4	12570383	12572255	AT4G24240
	Chr1	1665356	1668924	AT1G05580		Chr1	1690002	1692179	AT1G05650		Chr1	1104493	1106241	AT1G04180		Chr1	1167288	1169034	AT1G04360		Chr1	18656538	18658567	AT1G50360			Chr3	8788929	8790961	AT3G24255			Chr3	5621605	5624091	AT3G16525			Chr5	17812017	17815561	AT5G44230
	Chr1	1690002	1692179	AT1G05650		Chr1	1694070	1696191	AT1G05660		Chr1	1119699	1122786	AT1G04220		Chr1	1175033	1175768	AT1G04370		Chr1	8771759	8775875	AT1G24807			Chr4	9451365	9453189	AT4G16790			Chr3	6990048	6993016	AT3G20030			Chr5	15548743	15552019	AT5G38840
	Chr1	1693476	1693804	AT1G04403		Chr1	1719300	1719659	AT1G04417		Chr1	1120225	1122526	AT1G04247		Chr1	1176544	1178488	AT1G04380		Chr1	8771759	8775875	AT1G24822			Chr3	19271672	19272814	AT3G51930			Chr3	10166439	10169306	AT3G27470			Chr1	12424655	12427541	AT1G34120
	Chr1	1694070	1696191	AT1G05660		Chr1	1720593	1721309	AT1G05740		Chr1	1136078	1138663	AT1G04250		Chr1	1178925	1179176	AT1G04257		Chr1	17784409	17786585	AT1G48150			Chr5	8584722	8586631	AT5G24920			Chr2	7145663	7149630	AT2G16490			Chr2	14062731	14063604	AT2G33175
	Chr1	1720593	1721309	AT1G05740		Chr1	1718555	1720587	AT1G05730		Chr1	1140278	1141564	AT1G04260		Chr1	1206760	1207939	AT1G04445		Chr4	10036683	10037851	AT4G18110			Chr5	17535761	17538351	AT5G43660			Chr4	6759102	6759937	AT4G11070			Chr1	7022678	7024597	AT1G20270
	Chr1	1741204	1742619	AT1G05800		Chr1	1741204	1742619	AT1G05800		Chr1	1161289	1161982	AT1G04330		Chr1	1208521	1210026	AT1G04450		Chr4	445461	446727	AT4G01023			Chr1	11834684	11837668	AT1G32720			Chr1	6210877	6212149	AT1G18050			Chr1	7022678	7024597	AT1G20280
	Chr1	1748259	1749526	AT1G05810		Chr1	1775643	1778553	AT1G05880		Chr1	1167288	1169034	AT1G04360		Chr1	1210269	1210622	AT1G04455		Chr3	6019957	6022502	AT3G17600			Chr4	10609905	10611817	AT4G19460			Chr1	6210877	6212149	AT1G18060			Chr3	6431445	6433005	AT3G18700
	Chr1	1839483	1839729	AT1G04443		Chr1	1796778	1798254	AT1G05920		Chr1	1175033	1175768	AT1G04370		Chr1	1210924	1214841	AT1G04470		Chr2	11135654	11137329	AT2G26150			Chr1	29301654	29303609	AT1G77930			Chr1	23880125	23881279	AT1G64340			Chr2	10367723	10370418	AT2G24370
	Chr1	1843463	1846311	AT1G06080		Chr1	1839483	1839729	AT1G04443		Chr1	1176544	1178488	AT1G04380		Chr1	1221411	1224539	AT1G04500		Chr5	8584579	8587006	AT5G24920			Chr1	29301654	29303609	AT1G77932			Chr2	16172245	16175517	AT2G38680			Chr5	3814299	3815754	AT5G11840
	Chr1	1846701	1849693	AT1G06090		Chr1	1843463	1846311	AT1G06080		Chr1	1178925	1179176	AT1G04257		Chr1	1236754	1239199	AT1G04540		Chr1	28359243	28361784	AT1G75530			Chr4	10690031	10691964	AT4G19645			Chr5	2675651	2676692	AT5G08315			Chr3	21654336	21657595	AT3G58570
	Chr1	1851472	1853019	AT1G06100		Chr1	1846701	1849693	AT1G06090		Chr1	1206760	1207939	AT1G04445		Chr1	1240294	1242157	AT1G04550		Chr3	565288	567582	AT3G02640			Chr4	10389218	10391451	AT4G18970			Chr3	6485791	6487853	AT3G18820			Chr4	10631038	10635362	AT4G19510
	Chr1	1855910	1857718	AT1G06120		Chr1	1851472	1853019	AT1G06100		Chr1	1208521	1210026	AT1G04450		Chr1	1242506	1244244	AT1G04555		Chr3	565288	567582	AT3G02645			Chr5	23390795	23391749	AT5G57720			Chr3	8001917	8003767	AT3G22580			Chr2	7145760	7149617	AT2G16490
	Chr1	1862184	1862742	AT1G06135		Chr1	1862184	1862742	AT1G06135		Chr1	1210269	1210622	AT1G04455		Chr1	1246601	1248876	AT1G04570		Chr1	4738058	4741028	AT1G13825			Chr1	29009049	29011102	AT1G77210			Chr3	18756915	18759099	AT3G50540			Chr3	21694175	21696762	AT3G58650
	Chr1	1863425	1863840	AT1G06137		Chr1	1863425	1863840	AT1G06137		Chr1	1210924	1214841	AT1G04470		Chr1	1244947	1246059	AT1G04560		Chr1	4738058	4741028	AT1G13830			Chr3	22824623	22826814	AT3G61680			Chr1	27066504	27069002	AT1G71920			Chr4	2407792	2410845	AT4G04740
	Chr1	1905918	1906298	AT1G06225		Chr1	1905918	1906298	AT1G06225		Chr1	1221411	1224539	AT1G04500		Chr1	1249571	1251697	AT1G08855		Chr3	22568451	22570940	AT3G60990			Chr4	6103034	6106746	AT4G09660			Chr1	11609520	11610617	AT1G32220			Chr5	16715862	16717696	AT5G41765
	Chr1	1920307	1920949	AT1G06280		Chr1	1920307	1920949	AT1G06280		Chr1	1236754	1239199	AT1G04540		Chr1	1252005	1257893	AT1G04580		Chr1	30139073	30139902	AT1G80120			Chr1	1826718	1828047	AT1G06030			Chr1	11609520	11610617	AT1G32225			Chr1	20118228	20120194	AT1G53885
	Chr1	1926652	1930397	AT1G06310		Chr1	1926652	1930397	AT1G06310		Chr1	1246601	1248876	AT1G04570		Chr1	1261762	1272588	AT1G04600		Chr3	22393959	22394901	AT3G60580			Chr4	11517626	11519755	AT4G21680			Chr1	23294098	23297204	AT1G62880			Chr3	10150672	10152227	AT3G27425
	Chr1	1930523	1931449	AT1G06320		Chr1	1930523	1931449	AT1G06320		Chr1	1244947	1246059	AT1G04560		Chr1	1261762	1272588	AT1G04600		Chr1	8808695	8812622	AT1G25083			Chr1	21316706	21318216	AT1G57560			Chr1	23294098	23297204	AT1G62895			Chr4	6252395	6254678	AT4G09984
	Chr1	1931229	1932429	AT1G06330		Chr1	1931229	1932429	AT1G06330		Chr1	1249571	1251697	AT1G08855		Chr1	1279351	1281618	AT1G04610		Chr1	8808695	8812622	AT1G25097			Chr3	1436078	1439214	AT3G05140			Chr1	16973353	16975501	AT1G44900			Chr5	26787217	26789820	AT5G67120
	Chr1	1935227	1936841	AT1G06350		Chr1	1935227	1936841	AT1G06350		Chr1	1252005	1257893	AT1G04580		Chr1	1287831	1289820	AT1G04625		Chr5	20127631	20130736	AT5G49590			Chr1	2499151	2501384	AT1G08050			Chr1	10346651	10349392	AT1G29620			Chr4	520340	522315	AT4G01240
	Chr1	1938862	1940496	AT1G06360		Chr1	1933284	1934103	AT1G06340		Chr1	1261762	1272588	AT1G04600		Chr1	1300368	1301773	AT1G04660		Chr1	4290194	4290973	AT1G12610			Chr3	5819	7878	AT3G01030			Chr3	557536	558316	AT3G02610			Chr2	5589304	5592494	AT2G13430
	Chr1	1933284	1934103	AT1G06340		Chr1	1938862	1940496	AT1G06360		Chr1	1261762	1272588	AT1G04600		Chr1	1301829	1302758	AT1G04670		Chr4	12570415	12572540	AT4G24240			Chr5	25855818	25858764	AT5G09215			Chr5	5111337	5114740	AT5G15685			Chr3	719547	721839	AT3G03130
	Chr1	2025544	2027413	AT1G06620		Chr1	2025544	2027413	AT1G06620		Chr1	1279351	1281618	AT1G04610		Chr1	1303467	1307973	AT1G04680		Chr3	9943696	9945577	AT3G26960			Chr1	6626942	6627654	AT1G19210			Chr2	676648	679191	AT2G02520			Chr1	23879960	23881304	AT1G64340
	Chr1	2089417	2091686	AT1G06800		Chr1	2089417	2091686	AT1G06800		Chr1	1287831	1289820	AT1G04625		Chr1	1375824	1379228	AT1G04880		Chr1	6626941	6627644	AT1G19210			Chr1	4924143	4926799	AT1G14390			Chr5	1871070	1872907	AT5G06170			Chr3	2921703	2923294	AT3G09510
	Chr1	2089765	2090865	AT1G04513		Chr1	2091738	2092539	AT1G06810		Chr1	1300368	1301773	AT1G04660		Chr1	1375824	1379228	AT1G04880		Chr5	21138338	21140233	AT5G52050			Chr4	10036799	10037734	AT4G18110			Chr1	20433596	20434454	AT1G54760			Chr1	21917933	21920509	AT1G59650
	Chr1	2091738	2092539	AT1G06810		Chr1	2137871	2140975	AT1G06970		Chr1	1301829	1302758	AT1G04670		Chr1	1380382	1382599	AT1G04890		Chr1	3351804	3353114	AT1G10220			Chr4	13921333	13923189	AT4G27980			Chr1	26880223	26884642	AT1G71320			Chr1	21209985	21212517	AT1G56610
	Chr1	2142939	2143977	AT1G06980		Chr1	2142939	2143977	AT1G06980		Chr1	1303467	1307973	AT1G04680		Chr1	1382790	1383059	AT1G04293		Chr2	16839731	16842201	AT2G40320			Chr3	1006758	1008895	AT3G03910			Chr3	17098017	17101845	AT3G46470			Chr5	8361867	8365259	AT5G24480
	Chr1	2148342	2150152	AT1G06990		Chr1	2148342	2150152	AT1G06990		Chr1	1375824	1379228	AT1G04880		Chr1	1383008	1383422	AT1G04895		Chr3	16983520	16984942	AT3G46220			Chr5	18528119	18530460	AT5G45670			Chr4	14398041	14400393	AT4G29200			Chr5	26289229	26291025	AT5G00720
	Chr1	2150158	2152541	AT1G07000		Chr1	2156201	2156876	AT1G04543		Chr1	1380382	1382599	AT1G04890		Chr1	1391434	1395953	AT1G04920		Chr3	16983520	16984942	AT3G46230			Chr1	540432	543679	AT1G02570			Chr3	9120142	9121098	AT3G25030			Chr3	19647979	19649858	AT3G52990
	Chr1	2173952	2175038	AT1G07090		Chr1	2173952	2175038	AT1G07090		Chr1	1382790	1383059	AT1G04293		Chr1	1429048	1430056	AT1G05005		Chr3	16983520	16984942	AT3G07365			Chr1	540432	543679	AT1G02575			Chr4	10267299	10271537	AT4G03005			Chr1	21333814	21336726	AT1G57600
	Chr1	2202278	2203366	AT1G07175		Chr1	2202278	2203366	AT1G07175		Chr1	1383008	1383422	AT1G04895		Chr1	1429442	1429889	AT1G04307		Chr3	377140	379441	AT3G02120			Chr2	19289477	19291130	AT2G46950			Chr5	9856850	9859452	AT5G04515			Chr2	16020344	16024477	AT2G38255
	Chr1	2280746	2282828	AT1G07430		Chr1	2280746	2282828	AT1G07430		Chr1	1391434	1395953	AT1G04920		Chr1	1435155	1437763	AT1G05020		Chr3	377140	379441	AT3G02125			Chr2	15797269	15800630	AT2G37670			Chr3	19536786	19537830	AT3G52700			Chr1	26178083	26180469	AT1G69587
	Chr1	2289959	2291101	AT1G07460		Chr1	2289959	2291101	AT1G07460		Chr1	1429048	1430056	AT1G05005		Chr1	1459091	1460579	AT1G05080		Chr5	15662761	15663323	AT5G39120			Chr3	17905559	17907174	AT3G48350			Chr5	8744564	8747143	AT5G25240			Chr1	26178083	26180469	AT1G69588
	Chr1	2301375	2302121	AT1G07485		Chr1	2301375	2302121	AT1G07485		Chr1	1429442	1429889	AT1G04307		Chr1	1460988	1461670	AT1G05085		Chr3	3835319	3838943	AT3G12040			Chr1	24082300	24082825	AT1G64795			Chr1	20118058	20119463	AT1G53880			Chr1	5861908	5863539	AT1G17145
	Chr1	2301380	2302021	AT1G07490		Chr1	2301380	2302021	AT1G07490		Chr1	1435155	1437763	AT1G05020		Chr1	1461934	1462157	AT1G04327		Chr5	21240876	21243143	AT5G52310			Chr1	24082300	24082825	AT1G64790			Chr3	6431467	6432969	AT3G18700			Chr1	5861908	5863539	AT1G17147
	Chr1	2322543	2326570	AT1G07550		Chr1	2322543	2326570	AT1G07550		Chr1	1459091	1460579	AT1G05080		Chr1	1462043	1462340	AT1G04333		Chr1	2126576	2128190	AT1G06923			Chr1	19756855	19759483	AT1G53025			Chr3	4927728	4932237	AT3G14670			Chr4	14977671	14980379	AT4G30740
	Chr1	2322543	2326570	AT1G07550		Chr1	2322543	2326570	AT1G07550		Chr1	1460988	1461670	AT1G05085		Chr1	1480118	1480940	AT1G08865		Chr1	2126576	2128190	AT1G04533			Chr1	202234	204233	AT1G01560			Chr5	15662710	15663336	AT5G39120			Chr2	793692	796464	AT2G02800
	Chr1	2352131	2352911	AT1G04613		Chr1	2352131	2352911	AT1G04613		Chr1	1461934	1462157	AT1G04327		Chr1	1511895	1512842	AT1G05220		Chr1	2126576	2128190	AT1G06925			Chr5	18624651	18627675	AT5G45920			Chr5	14945498	14947254	AT5G05505			Chr2	793692	796464	AT2G02795
	Chr1	2353031	2356413	AT1G07640		Chr1	2353031	2356413	AT1G07640		Chr1	1462043	1462340	AT1G04333		Chr1	1512618	1514562	AT1G04353		Chr3	11104180	11106047	AT3G00560			Chr1	24931072	24933063	AT1G66830			Chr2	19161944	19163567	AT2G00960			Chr3	19738671	19740508	AT3G53240
	Chr1	2359111	2366736	AT1G07650		Chr1	2367437	2368436	AT1G07645		Chr1	1480118	1480940	AT1G08865		Chr1	1512896	1518900	AT1G05230		Chr3	20717800	20718847	AT3G55840			Chr1	29391796	29393154	AT1G78110			Chr4	18531853	18533597	AT4G39955			Chr5	24303117	24306147	AT5G60440
	Chr1	2367437	2368436	AT1G07645		Chr1	2376012	2377186	AT1G07680		Chr1	1511895	1512842	AT1G05220		Chr1	1529767	1531484	AT1G05260		Chr4	1287873	1291910	AT4G02910			Chr1	25750937	25751939	AT1G08997			Chr4	6365732	6367750	AT4G10230			Chr2	19162411	19164089	AT2G00960
	Chr1	2376012	2377186	AT1G07680		Chr1	2390531	2392628	AT1G07720		Chr1	1512618	1514562	AT1G04353		Chr1	1534830	1537602	AT1G05280		Chr4	13015477	13016201	AT4G25470			Chr1	26412615	26415084	AT1G70140			Chr1	20031874	20033697	AT1G53655			Chr2	19162411	19164089	AT2G09745
	Chr1	2377976	2379207	AT1G07690		Chr1	2414143	2414967	AT1G07795		Chr1	1512896	1518900	AT1G05230		Chr1	1538273	1538484	AT1G04373		Chr3	7103633	7107337	AT3G20370			Chr2	18496402	18498719	AT2G09550			Chr5	24303169	24306644	AT5G60440			Chr4	9521296	9523991	AT4G16920
	Chr1	2394236	2394474	AT1G04623		Chr1	2426705	2429225	AT1G07850		Chr1	1529767	1531484	AT1G05260		Chr1	1541348	1542432	AT1G05291		Chr3	19271611	19272728	AT3G51930			Chr2	18496402	18498719	AT2G09555			Chr5	7989966	7992564	AT5G23690			Chr3	20125416	20127892	AT3G54350
	Chr1	2390531	2392628	AT1G07720		Chr1	2428773	2432091	AT1G07870		Chr1	1534830	1537602	AT1G05280		Chr1	1542969	1543287	AT1G04377		Chr4	7592040	7593865	AT4G05995			Chr2	16839839	16842107	AT2G40320			Chr2	152127	153473	AT2G01310			Chr4	5701919	5703681	AT4G08900
	Chr1	2414143	2414967	AT1G07795		Chr1	2428911	2429431	AT1G07860		Chr1	1538273	1538484	AT1G04373		Chr1	1543157	1543394	AT1G04383		Chr2	15067128	15069734	AT2G35890			Chr3	237226	238830	AT3G01630			Chr1	26993885	26994730	AT1G71770			Chr1	6657296	6660624	AT1G19260
	Chr1	2426705	2429225	AT1G07850		Chr1	2475226	2476167	AT1G07985		Chr1	1541348	1542432	AT1G05291		Chr1	1543643	1544093	AT1G04387		Chr3	20349353	20351302	AT3G54925			Chr1	19958554	19961600	AT1G53470			Chr1	192645	194206	AT1G01530			Chr4	6766648	6769243	AT4G11100
	Chr1	2428773	2432091	AT1G07870		Chr1	2511647	2513454	AT1G08065		Chr1	1542969	1543287	AT1G04377		Chr1	1539152	1540562	AT1G05290		Chr3	20349353	20351302	AT3G54930			Chr2	5589354	5592444	AT2G13430			Chr2	1085	10352	AT2G01008			Chr1	3977831	3981524	AT1G11780
	Chr1	2428911	2429431	AT1G07860		Chr1	2516991	2518611	AT1G08080		Chr1	1543157	1543394	AT1G04383		Chr1	1544927	1547849	AT1G05300		Chr5	16416493	16420148	AT5G40990			Chr1	17758987	17761531	AT1G48095			Chr2	8378340	8382867	AT2G19360			Chr1	3977831	3981524	AT1G11785
	Chr1	2442570	2443746	AT1G07900		Chr1	2524023	2526322	AT1G08090		Chr1	1543643	1544093	AT1G04387		Chr1	1550503	1552587	AT1G05310		Chr4	10389201	10391253	AT4G18970			Chr3	4791492	4793528	AT3G14360			Chr2	8378340	8382867	AT2G19365			Chr4	8705808	8708276	AT4G15242
	Chr1	2475226	2476167	AT1G07985		Chr1	2527170	2529120	AT1G08100		Chr1	1539152	1540562	AT1G05290		Chr1	1558058	1558745	AT1G05330		Chr1	540311	543543	AT1G02570			Chr5	513435	514877	AT5G02400			Chr3	9974401	9977877	AT3G27040			Chr4	8705808	8708276	AT4G15245
	Chr1	2511647	2513454	AT1G08065		Chr1	2548496	2551544	AT1G08135		Chr1	1544927	1547849	AT1G05300		Chr1	1553568	1557848	AT1G05320		Chr1	26412729	26415145	AT1G70140			Chr4	16491526	16493352	AT4G34510			Chr1	5862903	5863856	AT1G17147			Chr4	14457401	14458996	AT4G29380
	Chr1	2516991	2518611	AT1G08080		Chr1	2551935	2555229	AT1G08140		Chr1	1550503	1552587	AT1G05310		Chr1	1569147	1572469	AT1G05370		Chr1	10936952	10937870	AT1G30810			Chr1	27985427	27988397	AT1G74458			Chr3	20187047	20189565	AT3G54530			Chr3	22567948	22570885	AT3G60990
	Chr1	2524023	2526322	AT1G08090		Chr1	2556191	2559228	AT1G08150		Chr1	1558058	1558745	AT1G05330		Chr1	1584073	1585421	AT1G05400		Chr1	10936952	10937870	AT1G30800			Chr3	247229	250622	AT3G01670			Chr4	6559861	6564024	AT4G10613			Chr5	19811572	19813221	AT5G48860
	Chr1	2527170	2529120	AT1G08100		Chr1	2559413	2560432	AT1G08160		Chr1	1553568	1557848	AT1G05320		Chr1	1589973	1591012	AT1G05420		Chr5	25633532	25635824	AT5G64060			Chr2	12925689	12928971	AT2G30320			Chr1	29839687	29842092	AT1G79330			Chr2	2330245	2333234	AT2G06002
	Chr1	2548496	2551544	AT1G08135		Chr1	2562769	2563706	AT1G08170		Chr1	1569147	1572469	AT1G05370		Chr1	1618504	1623489	AT1G05490		Chr5	5229532	5232134	AT5G16020			Chr1	13544358	13546787	AT1G36180			Chr1	29839687	29842092	AT1G09985			Chr2	2330245	2333234	AT2G06005
	Chr1	2551935	2555229	AT1G08140		Chr1	2609996	2613377	AT1G08290		Chr1	1584073	1585421	AT1G05400		Chr1	1629446	1630863	AT1G05510		Chr1	27132155	27134643	AT1G72120			Chr1	12361639	12366085	AT1G34015			Chr1	17961101	17962287	AT1G07493			Chr4	5782406	5785170	AT4G09012
	Chr1	2556191	2559228	AT1G08150		Chr1	2621860	2628594	AT1G08320		Chr1	1589973	1591012	AT1G05420		Chr1	1636249	1637914	AT1G05530		Chr1	27132155	27134643	AT1G72125			Chr1	17332356	17334240	AT1G47280			Chr2	8172469	8175273	AT2G18880			Chr4	5782406	5785170	AT4G09020
	Chr1	2559413	2560432	AT1G08160		Chr1	2630891	2632871	AT1G08340		Chr1	1599876	1601214	AT1G05450		Chr1	1639223	1640879	AT1G05540		Chr1	8823052	8827003	AT1G25155			Chr3	329451	332959	AT3G01990			Chr4	1936665	1938886	AT4G04030			Chr4	17623324	17625319	AT4G37490
	Chr1	2562769	2563706	AT1G08170		Chr1	2658602	2661310	AT1G08430		Chr1	1618504	1623489	AT1G05490		Chr1	1640959	1643917	AT1G05550		Chr4	17374592	17376586	AT4G36880			Chr4	8619414	8622925	AT4G15096			Chr5	15504734	15508161	AT5G00545			Chr1	24896957	24897895	AT1G66750
	Chr1	2609996	2613377	AT1G08290		Chr1	2662967	2665584	AT1G08440		Chr1	1618504	1623489	AT1G05490		Chr1	1640959	1643917	AT1G05550		Chr4	14977379	14980288	AT4G30740			Chr5	8856985	8858823	AT5G25450			Chr4	6102594	6106652	AT4G09660			Chr2	807486	809326	AT2G02820
	Chr1	2621860	2628594	AT1G08320		Chr1	2675813	2679824	AT1G08465		Chr1	1629446	1630863	AT1G05510		Chr1	1645300	1647435	AT1G05560		Chr2	19352453	19354624	AT2G47150			Chr4	6849480	6850991	AT4G11250			Chr4	13472515	13473164	AT4G26730			Chr5	9856885	9859515	AT5G04515
	Chr1	2629836	2630042	AT1G04653		Chr1	2760183	2761599	AT1G08670		Chr1	1636249	1637914	AT1G05530		Chr1	1645300	1647435	AT1G05562		Chr2	19352453	19354624	AT2G00970			Chr2	3495719	3497635	AT2G07739			Chr1	23173343	23176795	AT1G62580			Chr2	686655	689522	AT2G02550
	Chr1	2630891	2632871	AT1G08340		Chr1	2811989	2812782	AT1G08790		Chr1	1639223	1640879	AT1G05540		Chr1	1662352	1664398	AT1G05577		Chr3	20904888	20906368	AT3G56380			Chr2	3495719	3497635	AT2G05385			Chr3	19764726	19766378	AT3G53305			Chr5	1410260	1414367	AT5G04860
	Chr1	2658602	2661310	AT1G08430		Chr1	2841969	2846350	AT1G08860		Chr1	1640959	1643917	AT1G05550		Chr1	1665356	1668924	AT1G05580		Chr2	15944670	15945702	AT2G38090			Chr2	3495719	3497635	AT2G07662			Chr1	6233915	6237774	AT1G18130			Chr1	12361691	12366318	AT1G34015
	Chr1	2662967	2665584	AT1G08440		Chr1	2888427	2890965	AT1G08990		Chr1	1640959	1643917	AT1G05550		Chr1	1673861	1676077	AT1G05610		Chr5	21118806	21121271	AT5G52000			Chr1	18640624	18642851	AT1G07623			Chr4	7987063	7990180	AT4G13760			Chr2	19235749	19237110	AT2G46800
	Chr1	2675813	2679824	AT1G08465		Chr1	2908611	2909032	AT1G09030		Chr1	1645300	1647435	AT1G05560		Chr1	1677507	1678270	AT1G05615		Chr5	8361856	8365385	AT5G24480			Chr1	18640624	18642851	AT1G07627			Chr4	7987063	7990180	AT4G13750			Chr2	12753637	12755486	AT2G29920
	Chr1	2760183	2761599	AT1G08670		Chr1	2929217	2931850	AT1G09080		Chr1	1645300	1647435	AT1G05562		Chr1	1678881	1681710	AT1G05620		Chr3	5816	7978	AT3G01030			Chr1	29708751	29711337	AT1G78980			Chr4	5372268	5375548	AT4G05535			Chr2	12753637	12755486	AT2G29925
	Chr1	2811989	2812782	AT1G08790		Chr1	2932739	2936586	AT1G09090		Chr1	1662352	1664398	AT1G05577		Chr1	1690002	1692179	AT1G05650		Chr1	6282337	6283184	AT1G18265			Chr5	26181557	26184363	AT5G65500			Chr2	12656930	12660543	AT2G29605			Chr4	17392357	17395255	AT4G36910
	Chr1	2841969	2846350	AT1G08860		Chr1	2932739	2936586	AT1G09090		Chr1	1665356	1668924	AT1G05580		Chr1	1694070	1696191	AT1G05660		Chr5	18010269	18012857	AT5G44640			Chr5	7839054	7840812	AT5G23270			Chr2	18593865	18596672	AT2G45100			Chr3	17447384	17448945	AT3G47350
	Chr1	2864583	2865011	AT1G04677		Chr1	2984829	2986231	AT1G09240		Chr1	1673861	1676077	AT1G05610		Chr1	1701116	1702749	AT1G05675		Chr1	19963137	19964115	AT1G53480			Chr4	8148306	8152165	AT4G14140			Chr2	17092622	17095660	AT2G40955			Chr3	8129705	8133501	AT3G22940
	Chr1	2887245	2887706	AT1G08985		Chr1	3019639	3021443	AT1G09350		Chr1	1677507	1678270	AT1G05615		Chr1	1703002	1704838	AT1G05680		Chr1	19963137	19964115	AT1G07887			Chr3	2520741	2522419	AT3G07900			Chr1	7137176	7139375	AT1G20610			Chr1	11855751	11857693	AT1G32750
	Chr1	2888427	2890965	AT1G08990		Chr1	3021802	3022368	AT1G09360		Chr1	1678881	1681710	AT1G05620		Chr1	1706736	1709360	AT1G05690		Chr1	19963137	19964115	AT1G53490			Chr5	20007358	20010203	AT5G49340			Chr5	22110213	22112602	AT5G54460			Chr3	17927853	17929365	AT3G48410
	Chr1	2908611	2909032	AT1G09030		Chr1	3026062	3029549	AT1G09380		Chr1	1690002	1692179	AT1G05650		Chr1	1709673	1713474	AT1G05700		Chr1	27572770	27575058	AT1G73340			Chr5	20007358	20010203	AT5G49350			Chr2	19235736	19237017	AT2G46800			Chr3	17098026	17101825	AT3G46470
	Chr1	2929217	2931850	AT1G09080		Chr1	3057975	3060757	AT1G09480		Chr1	1694070	1696191	AT1G05660		Chr1	1714818	1717290	AT1G05710		Chr1	27065124	27065730	AT1G71910			Chr5	14546707	14549734	AT5G36900			Chr1	21844045	21846442	AT1G59406			Chr4	15816098	15816729	AT4G03335
	Chr1	2932739	2936586	AT1G09090		Chr1	3061170	3061743	AT1G09483		Chr1	1701116	1702749	AT1G05675		Chr1	1719300	1719659	AT1G04417		Chr1	21729081	21732264	AT1G58525			Chr3	933666	934528	AT3G03726			Chr5	6341166	6342020	AT5G18990			Chr4	7228630	7231679	AT4G12060
	Chr1	2984829	2986231	AT1G09240		Chr1	3066674	3068796	AT1G09500		Chr1	1703002	1704838	AT1G05680		Chr1	1720593	1721309	AT1G05740		Chr1	21729081	21732264	AT1G58520			Chr2	7145676	7149416	AT2G16490			Chr5	23024793	23029216	AT5G56920			Chr1	20621715	20623305	AT1G55280
	Chr1	2993381	2993820	AT1G09260		Chr1	3069357	3070910	AT1G09510		Chr1	1706736	1709360	AT1G05690		Chr1	1718555	1720587	AT1G05730		Chr3	5621907	5624362	AT3G16525			Chr4	1287937	1291870	AT4G02910			Chr5	23024793	23029216	AT5G56930			Chr3	22172781	22174223	AT3G09335
	Chr1	3019639	3021443	AT1G09350		Chr1	3083820	3084222	AT1G04703		Chr1	1709673	1713474	AT1G05700		Chr1	1741204	1742619	AT1G05800		Chr3	21818491	21821061	AT3G59030			Chr3	21905941	21908321	AT3G59270			Chr3	11157761	11159870	AT3G29190			Chr3	9184503	9189003	AT3G25230
	Chr1	3021802	3022368	AT1G09360		Chr1	3089576	3092327	AT1G09550		Chr1	1714818	1717290	AT1G05710		Chr1	1748259	1749526	AT1G05810		Chr3	1255227	1256890	AT3G04620			Chr2	1576802	1581396	AT2G04530			Chr1	18655949	18658526	AT1G50360			Chr5	19638735	19642037	AT5G48460
	Chr1	3026062	3029549	AT1G09380		Chr1	3131952	3132215	AT1G04717		Chr1	1719300	1719659	AT1G04417		Chr1	1775643	1778553	AT1G05880		Chr4	683102	687323	AT4G01580			Chr3	15217891	15221860	AT3G43260			Chr5	24942543	24945694	AT5G62110			Chr2	8172561	8175320	AT2G18880
	Chr1	3057975	3060757	AT1G09480		Chr1	3133008	3133674	AT1G09665		Chr1	1720593	1721309	AT1G05740		Chr1	1796778	1798254	AT1G05920		Chr4	11123206	11125962	AT4G20735			Chr1	9175298	9177943	AT1G26558			Chr3	15218232	15222095	AT3G43260			Chr2	762436	763150	AT2G02720
	Chr1	3057975	3060757	AT1G09480		Chr1	3168434	3171018	AT1G09790		Chr1	1718555	1720587	AT1G05730		Chr1	1799418	1800933	AT1G05930		Chr1	24637971	24641295	AT1G66170			Chr2	8985954	8987416	AT2G20880			Chr2	6034582	6036734	AT2G14247			Chr1	26880213	26883792	AT1G71320
	Chr1	3061170	3061743	AT1G09483		Chr1	3214049	3217603	AT1G09890		Chr1	1741204	1742619	AT1G05800		Chr1	1804401	1807670	AT1G05950		Chr4	1045371	1047024	AT4G02380			Chr4	16075186	16077887	AT4G33390			Chr2	8418850	8423168	AT2G19440			Chr2	1090	10356	AT2G01008
	Chr1	3066674	3068796	AT1G09500		Chr1	3214049	3217603	AT1G09890		Chr1	1748259	1749526	AT1G05810		Chr1	1824250	1826163	AT1G06020		Chr5	20993576	20995067	AT5G51670			Chr2	8836122	8838735	AT2G20510			Chr1	11834750	11837714	AT1G32720			Chr4	9800689	9803390	AT4G17590
	Chr1	3069357	3070910	AT1G09510		Chr1	3230450	3233259	AT1G09932		Chr1	1775643	1778553	AT1G05880		Chr1	1826803	1828279	AT1G06030		Chr1	20226165	20226961	AT1G07947			Chr2	17548054	17548921	AT2G42060			Chr4	6669506	6672748	AT4G05835			Chr2	8528958	8530246	AT2G19796
	Chr1	3083820	3084222	AT1G04703		Chr1	3233924	3235530	AT1G09935		Chr1	1796778	1798254	AT1G05920		Chr1	1839483	1839729	AT1G04443		Chr1	17758881	17761613	AT1G48095			Chr5	609505	613930	AT5G02700			Chr2	16150406	16153608	AT2G38620			Chr1	17177949	17179484	AT1G45403
	Chr1	3089576	3092327	AT1G09550		Chr1	3227490	3230257	AT1G09930		Chr1	1799418	1800933	AT1G05930		Chr1	1843463	1846311	AT1G06080		Chr5	23279640	23281245	AT5G57480			Chr5	609505	613930	AT5G02710			Chr5	14522399	14525763	AT5G36870			Chr5	5706790	5710031	AT5G17320
	Chr1	3117137	3117567	AT1G09625		Chr1	3243986	3247216	AT1G09960		Chr1	1804401	1807670	AT1G05950		Chr1	1843463	1846311	AT1G06080		Chr3	19536574	19537815	AT3G52700			Chr4	7962435	7963403	AT4G13710			Chr1	780544	782798	AT1G03200			Chr3	16839139	16841992	AT3G45820
	Chr1	3131952	3132215	AT1G04717		Chr1	3265886	3268823	AT1G10010		Chr1	1824250	1826163	AT1G06020		Chr1	1846701	1849693	AT1G06090		Chr4	15922445	15924217	AT4G32990			Chr5	15543146	15545210	AT5G38820			Chr3	18651955	18655198	AT3G50320			Chr3	16839139	16841992	AT3G45830
	Chr1	3133008	3133674	AT1G09665		Chr1	3284073	3287292	AT1G10060		Chr1	1826803	1828279	AT1G06030		Chr1	1851472	1853019	AT1G06100		Chr4	17423122	17423971	AT4G36950			Chr4	6559904	6563911	AT4G10613			Chr4	15012615	15016602	AT4G30830			Chr3	105439	107802	AT3G00990
	Chr1	3168434	3171018	AT1G09790		Chr1	3354243	3354856	AT1G10225		Chr1	1839483	1839729	AT1G04443		Chr1	1853059	1855378	AT1G06110		Chr3	20259044	20260469	AT3G54730			Chr1	6210882	6211996	AT1G18050			Chr5	15344369	15345195	AT5G38378			Chr3	105439	107802	AT3G01320
	Chr1	3212812	3213011	AT1G04747		Chr1	3360087	3360508	AT1G10250		Chr1	1843463	1846311	AT1G06080		Chr1	1855910	1857718	AT1G06120		Chr2	19289478	19291123	AT2G46950			Chr1	3352014	3353020	AT1G10220			Chr1	9572423	9573955	AT1G06097			Chr3	20259147	20260433	AT3G54730
	Chr1	3214049	3217603	AT1G09890		Chr1	3361410	3362012	AT1G04783		Chr1	1843463	1846311	AT1G06080		Chr1	1857757	1860938	AT1G06130		Chr5	7668098	7670236	AT5G22930			Chr1	4467324	4468899	AT1G13110			Chr4	14333457	14335298	AT4G29090			Chr2	13559395	13562297	AT2G31900
	Chr1	3208712	3213468	AT1G09880		Chr1	3400554	3402420	AT1G10380		Chr1	1846701	1849693	AT1G06090		Chr1	1862184	1862742	AT1G06135		Chr1	7023424	7024629	AT1G20280			Chr3	19182351	19184168	AT3G51710			Chr4	10049911	10054861	AT4G18150			Chr2	13559395	13562297	AT2G31902
	Chr1	3214049	3217603	AT1G09890		Chr1	3403132	3405920	AT1G10385		Chr1	1851472	1853019	AT1G06100		Chr1	1863425	1863840	AT1G06137		Chr4	12852138	12853919	AT4G25000			Chr5	16870572	16872066	AT5G42210			Chr4	11123591	11125855	AT4G20735			Chr5	7152099	7155638	AT5G21060
	Chr1	3230450	3233259	AT1G09932		Chr1	3406209	3406622	AT1G04787		Chr1	1862184	1862742	AT1G06135		Chr1	1882907	1883992	AT1G06160		Chr4	10609798	10611817	AT4G19460			Chr4	445503	446715	AT4G01023			Chr3	20987540	20991135	AT3G56670			Chr1	6233970	6237834	AT1G18130
	Chr1	3233924	3235530	AT1G09935		Chr1	3414823	3416474	AT1G10400		Chr1	1863425	1863840	AT1G06137		Chr1	1884981	1886904	AT1G06170		Chr3	22458215	22459833	AT3G60760			Chr1	27132118	27134682	AT1G72120			Chr3	20987540	20991135	AT3G56660			Chr5	17542547	17545224	AT5G43680
	Chr1	3227490	3230257	AT1G09930		Chr1	3449567	3451226	AT1G10480		Chr1	1882907	1883992	AT1G06160		Chr1	1920307	1920949	AT1G06280		Chr4	11441008	11441721	AT4G21500			Chr1	27132118	27134682	AT1G72125			Chr5	17726136	17727104	AT5G44050			Chr2	7503708	7506078	AT2G17260
	Chr1	3240531	3241863	AT1G09950		Chr1	3493770	3495244	AT1G10585		Chr1	1884981	1886904	AT1G06170		Chr1	1926652	1930397	AT1G06310		Chr1	1435366	1437359	AT1G05020			Chr3	6431692	6432926	AT3G18700			Chr1	17004095	17007366	AT1G44980			Chr5	5699842	5703110	AT5G17310
	Chr1	3243986	3247216	AT1G09960		Chr1	3496911	3499439	AT1G10586		Chr1	1905918	1906298	AT1G06225		Chr1	1930523	1931449	AT1G06320		Chr3	22824567	22826826	AT3G61680			Chr2	15880202	15881723	AT2G08895			Chr5	4987131	4990057	AT5G15360			Chr2	7306487	7308959	AT2G16870
	Chr1	3265886	3268823	AT1G10010		Chr1	3509001	3512321	AT1G10620		Chr1	1920307	1920949	AT1G06280		Chr1	1931229	1932429	AT1G06330		Chr3	3722961	3723725	AT3G11773			Chr5	24214005	24215474	AT5G60140			Chr5	10034371	10037114	AT5G28040			Chr1	20488756	20490130	AT1G54950
	Chr1	3284073	3287292	AT1G10060		Chr1	3530353	3532017	AT1G10657		Chr1	1926652	1930397	AT1G06310		Chr1	1935227	1936841	AT1G06350		Chr2	14080458	14082647	AT2G33230			Chr5	21742797	21745867	AT5G53520			Chr1	1194156	1196368	AT1G04425			Chr4	14398035	14400598	AT4G29200
	Chr1	3354243	3354856	AT1G10225		Chr1	3538333	3543925	AT1G10680		Chr1	1930523	1931449	AT1G06320		Chr1	1933284	1934103	AT1G06340		Chr5	25550677	25553802	AT5G63850			Chr5	8361885	8365232	AT5G24480			Chr1	1194156	1196368	AT1G08835			Chr4	6845987	6847409	AT4G11240
	Chr1	3360087	3360508	AT1G10250		Chr1	3538333	3543925	AT1G10680		Chr1	1931229	1932429	AT1G06330		Chr1	1938862	1940496	AT1G06360		Chr3	23398865	23400868	AT3G63350			Chr3	565012	567546	AT3G02640			Chr4	18498732	18500055	AT4G39860			Chr2	18853410	18855168	AT2G45780
	Chr1	3361410	3362012	AT1G04783		Chr1	3574312	3574830	AT1G10747		Chr1	1935227	1936841	AT1G06350		Chr1	1993903	1996355	AT1G06520		Chr1	17178011	17179167	AT1G45403			Chr3	565012	567546	AT3G02645			Chr2	10686918	10687811	AT2G08105			Chr2	17634768	17638037	AT2G42340
	Chr1	3400554	3402420	AT1G10380		Chr1	3623998	3625422	AT1G10875		Chr1	1933284	1934103	AT1G06340		Chr1	2025544	2027413	AT1G06620		Chr3	1435808	1438962	AT3G05140			Chr4	13732922	13734161	AT4G27460			Chr3	10004537	10008478	AT3G27140			Chr4	11123589	11127131	AT4G20735
	Chr1	3403132	3405920	AT1G10385		Chr1	3625623	3627082	AT1G10880		Chr1	1938862	1940496	AT1G06360		Chr1	2089417	2091686	AT1G06800		Chr1	4923867	4926739	AT1G14390			Chr3	18652005	18655001	AT3G50320			Chr5	21142897	21145575	AT5G00650			Chr4	11123589	11127131	AT4G20740
	Chr1	3406209	3406622	AT1G04787		Chr1	3690012	3694200	AT1G11070		Chr1	1978378	1989409	AT1G06490		Chr1	2091738	2092539	AT1G06810		Chr5	3017360	3020176	AT5G09730			Chr2	987620	991007	AT2G03260			Chr3	7563593	7567172	AT3G21470			Chr3	8936625	8939056	AT3G24514
	Chr1	3414823	3416474	AT1G10400		Chr1	3694328	3698013	AT1G11080		Chr1	1993903	1996355	AT1G06520		Chr1	2124676	2125902	AT1G06920		Chr1	22591950	22596172	AT1G61260			Chr1	24391794	24393619	AT1G65610			Chr3	7563593	7567172	AT3G21473			Chr3	8936625	8939056	AT3G24517
	Chr1	3449567	3451226	AT1G10480		Chr1	3750066	3752780	AT1G11190		Chr1	2025544	2027413	AT1G06620		Chr1	2126670	2127570	AT1G06923		Chr3	21258672	21260795	AT3G57440			Chr5	20883953	20886547	AT5G51420			Chr3	15954306	15957372	AT3G44265			Chr3	8936625	8939056	AT3G24518
	Chr1	3479066	3481041	AT1G10550		Chr1	3755668	3756998	AT1G11210		Chr1	2089417	2091686	AT1G06800		Chr1	2127414	2127973	AT1G04533		Chr1	6657351	6660657	AT1G19260			Chr3	21391905	21393765	AT3G57740			Chr1	5098364	5102161	AT1G14800			Chr3	20187898	20190788	AT3G54540
	Chr1	3493770	3495244	AT1G10585		Chr1	3759862	3761461	AT1G11220		Chr1	2091738	2092539	AT1G06810		Chr1	2127704	2128611	AT1G06925		Chr1	12152585	12155340	AT1G33500			Chr1	1167568	1168830	AT1G04360			Chr2	17903748	17906029	AT2G43050			Chr1	17726958	17728198	AT1G48050
	Chr1	3496911	3499439	AT1G10586		Chr1	3763268	3764483	AT1G11230		Chr1	2124676	2125902	AT1G06920		Chr1	2128843	2129883	AT1G06930		Chr2	152054	153387	AT2G01310			Chr2	19251107	19254336	AT2G46860			Chr4	8619992	8623496	AT4G15096			Chr3	18652010	18655423	AT3G50320
	Chr1	3501145	3501904	AT1G10588		Chr1	3768521	3770102	AT1G11250		Chr1	2126670	2127570	AT1G06923		Chr1	2137871	2140975	AT1G06970		Chr3	6430834	6432980	AT3G18700			Chr2	19251107	19254336	AT2G46850			Chr1	21690952	21693280	AT1G58390			Chr2	14846661	14848534	AT2G35250
	Chr1	3509001	3512321	AT1G10620		Chr1	3766754	3769799	AT1G11240		Chr1	2127414	2127973	AT1G04533		Chr1	2142939	2143977	AT1G06980		Chr3	17098031	17101793	AT3G46470			Chr1	20252746	20254606	AT1G54240			Chr4	9521212	9524068	AT4G16920			Chr4	5604738	5606593	AT4G08780
	Chr1	3530353	3532017	AT1G10657		Chr1	3827851	3831068	AT1G11370		Chr1	2127704	2128611	AT1G06925		Chr1	2148342	2150152	AT1G06990		Chr1	21079371	21082264	AT1G56300			Chr5	25499656	25502757	AT5G63710			Chr3	155820	159144	AT3G01415			Chr1	5657450	5661131	AT1G16540
	Chr1	3538333	3543925	AT1G10680		Chr1	3853184	3855507	AT1G11450		Chr1	2128843	2129883	AT1G06930		Chr1	2173952	2175038	AT1G07090		Chr5	22356607	22358216	AT5G55090			Chr2	13799171	13799951	AT2G32510			Chr4	17623114	17625332	AT4G37490			Chr2	1153345	1156002	AT2G03780
	Chr1	3544913	3545614	AT1G10682		Chr1	3856942	3859465	AT1G11460		Chr1	2137871	2140975	AT1G06970		Chr1	2197854	2199773	AT1G07160		Chr2	793777	796500	AT2G02800			Chr2	16540870	16542837	AT2G39690			Chr2	17634787	17637671	AT2G42340			Chr2	16172249	16176491	AT2G38680
	Chr1	3538333	3543925	AT1G10680		Chr1	3859662	3860604	AT1G11470		Chr1	2142939	2143977	AT1G06980		Chr1	2202278	2203366	AT1G07175		Chr2	793777	796500	AT2G02795			Chr1	12497228	12501057	AT1G34290			Chr3	10150458	10152247	AT3G27425			Chr5	5590677	5594304	AT5G17010
	Chr1	3572674	3573173	AT1G10745		Chr1	3870679	3871702	AT1G11500		Chr1	2148342	2150152	AT1G06990		Chr1	2204104	2207099	AT1G07180		Chr1	29075500	29077453	AT1G77380			Chr1	10936958	10937806	AT1G30810			Chr5	13602491	13605008	AT5G35405			Chr3	4467616	4470290	AT3G13662
	Chr1	3574312	3574830	AT1G10747		Chr1	3871723	3872929	AT1G11510		Chr1	2150158	2152541	AT1G07000		Chr1	2238017	2241471	AT1G07280		Chr1	29319380	29321689	AT1G77990			Chr1	10936958	10937806	AT1G30800			Chr1	29262756	29264362	AT1G77810			Chr3	4467616	4470290	AT3G13670
	Chr1	3574807	3578783	AT1G10750		Chr1	3873029	3873619	AT1G11520		Chr1	2173952	2175038	AT1G07090		Chr1	2254822	2256850	AT1G07340		Chr5	25088753	25090571	AT5G62480			Chr5	774901	777362	AT5G03250			Chr5	1956019	1959198	AT5G06400			Chr4	6365714	6367689	AT4G10230
	Chr1	3623998	3625422	AT1G10875		Chr1	3881627	3882819	AT1G11560		Chr1	2197854	2199773	AT1G07160		Chr1	2280746	2282828	AT1G07430		Chr5	25088753	25090571	AT5G62490			Chr1	27513843	27516685	AT1G73170			Chr1	8778161	8781783	AT1G24851			Chr2	9160153	9163898	AT2G21410
	Chr1	3625623	3627082	AT1G10880		Chr1	3884342	3884960	AT1G11572		Chr1	2202278	2203366	AT1G07175		Chr1	2286185	2287791	AT1G07440		Chr5	19252720	19256146	AT5G47460			Chr1	660340	662255	AT1G02930			Chr3	18192659	18193235	AT3G49070			Chr2	18496683	18499374	AT2G09555
	Chr1	3690012	3694200	AT1G11070		Chr1	3888610	3890824	AT1G11580		Chr1	2204104	2207099	AT1G07180		Chr1	2287926	2289336	AT1G07450		Chr5	19252720	19256146	AT5G47470			Chr5	21240882	21243474	AT5G52310			Chr2	9168966	9170113	AT2G21420			Chr2	18496683	18499374	AT2G44850
	Chr1	3694328	3698013	AT1G11080		Chr1	3901950	3903895	AT1G11600		Chr1	2238017	2241471	AT1G07280		Chr1	2289959	2291101	AT1G07460		Chr2	8529009	8530331	AT2G19796			Chr4	18288751	18289732	AT4G39320			Chr2	6044090	6048313	AT2G14265			Chr3	18583284	18585845	AT3G50110
	Chr1	3718652	3719832	AT1G11125		Chr1	3905579	3906818	AT1G11608		Chr1	2250920	2254036	AT1G07330		Chr1	2318143	2321664	AT1G07540		Chr2	16893178	16894128	AT2G09155			Chr1	8778566	8781642	AT1G24851			Chr1	3897566	3900009	AT1G11593			Chr3	18583284	18585845	AT3G50120
	Chr1	3750066	3752780	AT1G11190		Chr1	3906862	3909338	AT1G11610		Chr1	2254822	2256850	AT1G07340		Chr1	2321382	2321961	AT1G04593		Chr1	18395230	18398782	AT1G49715			Chr3	14311842	14315712	AT3G42155			Chr4	9800256	9803373	AT4G17590			Chr3	18756946	18759323	AT3G50540
	Chr1	3755668	3756998	AT1G11210		Chr1	3910833	3911924	AT1G11620		Chr1	2280746	2282828	AT1G07430		Chr1	2322543	2326570	AT1G07550		Chr2	12289595	12291515	AT2G28650			Chr3	14311842	14315712	AT3G42160			Chr3	10182141	10182408	AT3G27495			Chr5	25770315	25771101	AT5G64440
	Chr1	3759862	3761461	AT1G11220		Chr1	3919237	3919869	AT1G11655		Chr1	2286185	2287791	AT1G07440		Chr1	2327315	2331148	AT1G07560		Chr1	192720	194137	AT1G01530			Chr5	22547384	22550524	AT5G55680			Chr3	4467541	4468785	AT3G13662			Chr4	6549043	6551397	AT4G10603
	Chr1	3763268	3764483	AT1G11230		Chr1	3928115	3931701	AT1G11670		Chr1	2287926	2289336	AT1G07450		Chr1	2344390	2346889	AT1G07620		Chr3	557163	558280	AT3G02610			Chr5	22547384	22550524	AT5G55690			Chr3	6705017	6707009	AT3G19350			Chr5	26116314	26118396	AT5G09355
	Chr1	3768521	3770102	AT1G11250		Chr1	3963054	3966850	AT1G11740		Chr1	2289959	2291101	AT1G07460		Chr1	2352131	2352911	AT1G04613		Chr2	7145731	7149711	AT2G16490			Chr4	13818774	13820485	AT4G27670			Chr3	4584115	4585465	AT3G13898			Chr3	19764790	19766425	AT3G53305
	Chr1	3766754	3769799	AT1G11240		Chr1	3973874	3974594	AT1G11765		Chr1	2301375	2302121	AT1G07485		Chr1	2353031	2356413	AT1G07640		Chr5	9769221	9771169	AT5G27610			Chr2	8378676	8382899	AT2G19360			Chr3	17176716	17177543	AT3G07505			Chr2	455508	458930	AT2G01980
	Chr1	3827851	3831068	AT1G11370		Chr1	3975607	3977379	AT1G11770		Chr1	2301380	2302021	AT1G07490		Chr1	2367437	2368436	AT1G07645		Chr1	204987	205988	AT1G01570			Chr2	8378676	8382899	AT2G19365			Chr1	8815271	8818651	AT1G25112			Chr2	17903730	17905383	AT2G43050
	Chr1	3844461	3846956	AT1G11420		Chr1	3975947	3977255	AT1G04887		Chr1	2318143	2321664	AT1G07540		Chr1	2377976	2379207	AT1G07690		Chr1	26122161	26122993	AT1G69490			Chr5	7668114	7669466	AT5G22930			Chr1	8815271	8818651	AT1G25141			Chr2	19071301	19074594	AT2G46470
	Chr1	3853184	3855507	AT1G11450		Chr1	3989763	3991066	AT1G11810		Chr1	2321382	2321961	AT1G04593		Chr1	2390531	2392628	AT1G07720		Chr1	20032011	20034185	AT1G53655			Chr1	11609365	11610606	AT1G32220			Chr2	6274569	6274864	AT2G14670			Chr1	19423616	19425301	AT1G52160
	Chr1	3856942	3859465	AT1G11460		Chr1	3999157	4000024	AT1G11850		Chr1	2322543	2326570	AT1G07550		Chr1	2403992	2406049	AT1G07750		Chr1	13042566	13044098	AT1G06897			Chr1	11609365	11610606	AT1G32225			Chr4	8148352	8152173	AT4G14140			Chr1	19423616	19425301	AT1G52180
	Chr1	3859662	3860604	AT1G11470		Chr1	4021750	4023292	AT1G11915		Chr1	2327315	2331148	AT1G07560		Chr1	2414143	2414967	AT1G07795		Chr1	12261444	12264843	AT1G33800			Chr4	10049988	10054641	AT4G18150			Chr2	2325414	2326564	AT2G05995			Chr1	28815425	28816346	AT1G76780
	Chr1	3871723	3872929	AT1G11510		Chr1	4023533	4025113	AT1G11920		Chr1	2344390	2346889	AT1G07620		Chr1	2426705	2429225	AT1G07850		Chr2	19235774	19237012	AT2G46800			Chr2	17160103	17160864	AT2G41170			Chr1	29301755	29304193	AT1G77930			Chr5	15482019	15486384	AT5G38690
	Chr1	3873029	3873619	AT1G11520		Chr1	4025930	4026733	AT1G11925		Chr1	2352131	2352911	AT1G04613		Chr1	2428773	2432091	AT1G07870		Chr1	6210891	6212004	AT1G18050			Chr2	16447027	16449199	AT2G39375			Chr1	29301755	29304193	AT1G77932			Chr1	237128	239368	AT1G01650
	Chr1	3881627	3882819	AT1G11560		Chr1	4045619	4045855	AT1G11980		Chr1	2353031	2356413	AT1G07640		Chr1	2428911	2429431	AT1G07860		Chr4	17819237	17820660	AT4G03465			Chr2	16447027	16449199	AT2G39380			Chr3	10222075	10226388	AT3G27600			Chr5	20802432	20805025	AT5G51195
	Chr1	3884342	3884960	AT1G11572		Chr1	4046079	4049140	AT1G11990		Chr1	2367437	2368436	AT1G07645		Chr1	2433896	2435858	AT1G07880		Chr5	22547402	22550499	AT5G55680			Chr4	6459904	6462090	AT4G10440			Chr3	10222075	10226388	AT3G27610			Chr1	18384832	18388324	AT1G49670
	Chr1	3888610	3890824	AT1G11580		Chr1	4056165	4057968	AT1G12010		Chr1	2376012	2377186	AT1G07680		Chr1	2475226	2476167	AT1G07985		Chr5	22547402	22550499	AT5G55690			Chr4	6037085	6038452	AT4G09545			Chr5	16716041	16717775	AT5G41765			Chr2	9261792	9264418	AT2G21655
	Chr1	3901950	3903895	AT1G11600		Chr1	4064485	4066344	AT1G12030		Chr1	2377976	2379207	AT1G07690		Chr1	2498794	2501581	AT1G08050		Chr5	7839010	7841033	AT5G23270			Chr1	1278717	1280711	AT1G04610			Chr3	16548739	16552318	AT3G45200			Chr5	8896092	8898590	AT5G25560
	Chr1	3905579	3906818	AT1G11608		Chr1	4068821	4069413	AT1G04923		Chr1	2390531	2392628	AT1G07720		Chr1	2511647	2513454	AT1G08065		Chr5	26181521	26184197	AT5G65500			Chr3	22341071	22343606	AT3G60450			Chr1	10849002	10853673	AT1G30610			Chr3	19519467	19521341	AT3G52640
	Chr1	3906862	3909338	AT1G11610		Chr1	4077498	4078095	AT1G12064		Chr1	2403992	2406049	AT1G07750		Chr1	2514150	2516620	AT1G08070		Chr2	6034500	6036791	AT2G14247			Chr3	22341071	22343606	AT3G60460			Chr2	7249659	7251937	AT2G16710			Chr3	14324873	14326908	AT3G42180
	Chr1	3910833	3911924	AT1G11620		Chr1	4078547	4080236	AT1G12070		Chr1	2414143	2414967	AT1G07795		Chr1	2516991	2518611	AT1G08080		Chr2	18791257	18792434	AT2G45610			Chr2	15158626	15159271	AT2G36090			Chr1	8829165	8832980	AT1G25180			Chr1	11323320	11326020	AT1G31640
	Chr1	3919237	3919869	AT1G11655		Chr1	4084162	4085185	AT1G12080		Chr1	2426705	2429225	AT1G07850		Chr1	2524023	2526322	AT1G08090		Chr1	423029	426203	AT1G08785			Chr5	1956068	1959162	AT5G06400			Chr4	16325235	16327531	AT4G34071			Chr5	17104678	17107615	AT5G42660
	Chr1	3928115	3931701	AT1G11670		Chr1	4089664	4090857	AT1G12090		Chr1	2428773	2432091	AT1G07870		Chr1	2527170	2529120	AT1G08100		Chr2	15717690	15719555	AT2G37440			Chr2	14539875	14541407	AT2G34500			Chr4	16325235	16327531	AT4G34090			Chr3	6705001	6707028	AT3G19350
	Chr1	3928115	3931701	AT1G11670		Chr1	4095246	4095883	AT1G12100		Chr1	2428911	2429431	AT1G07860		Chr1	2548496	2551544	AT1G08135		Chr2	5588742	5592652	AT2G13430			Chr3	15229377	15233528	AT3G43291			Chr4	16325235	16327531	AT4G34080			Chr1	9852892	9856247	AT1G28210
	Chr1	3961348	3961464	AT1G11735		Chr1	4105223	4109601	AT1G12110		Chr1	2433896	2435858	AT1G07880		Chr1	2551935	2555229	AT1G08140		Chr5	4172977	4174941	AT5G13150			Chr5	4371180	4372927	AT5G13580			Chr3	18584736	18585657	AT3G50120			Chr2	10540007	10544469	AT2G24755
	Chr1	3963054	3966850	AT1G11740		Chr1	4105223	4109601	AT1G12110		Chr1	2475226	2476167	AT1G07985		Chr1	2556191	2559228	AT1G08150		Chr5	8856992	8858764	AT5G25450			Chr1	3484813	3486568	AT1G10560			Chr5	21174142	21176117	AT5G52115			Chr2	10686926	10687725	AT2G08105
	Chr1	3973874	3974594	AT1G11765		Chr1	4118594	4120959	AT1G12130		Chr1	2498794	2501581	AT1G08050		Chr1	2559413	2560432	AT1G08160		Chr2	19154320	19155782	AT2G46660			Chr4	13472480	13473185	AT4G26730			Chr4	6140252	6143397	AT4G09740			Chr1	11957723	11961179	AT1G33010
	Chr1	3975607	3977379	AT1G11770		Chr1	4125990	4128310	AT1G12160		Chr1	2511647	2513454	AT1G08065		Chr1	2561449	2562316	AT1G08165		Chr4	6849455	6850869	AT4G11250			Chr5	24973406	24975531	AT5G62170			Chr1	28591933	28593086	AT1G76190			Chr5	24942376	24945364	AT5G62110
	Chr1	3975947	3977255	AT1G04887		Chr1	4130396	4131168	AT1G12180		Chr1	2514150	2516620	AT1G08070		Chr1	2562769	2563706	AT1G08170		Chr5	17473843	17474500	AT5G43510			Chr1	693214	696801	AT1G03010			Chr1	16870352	16871355	AT1G44575			Chr3	9555429	9559542	AT3G26135
	Chr1	3976839	3979237	AT1G11780		Chr1	4128607	4129701	AT1G12170		Chr1	2516991	2518611	AT1G08080		Chr1	2609996	2613377	AT1G08290		Chr1	24082263	24083199	AT1G64795			Chr5	2932118	2932802	AT5G09430			Chr2	1010448	1012941	AT2G03330			Chr1	21729410	21732216	AT1G58525
	Chr1	3989763	3991066	AT1G11810		Chr1	4132967	4134094	AT1G12190		Chr1	2524023	2526322	AT1G08090		Chr1	2621860	2628594	AT1G08320		Chr1	24082263	24083199	AT1G64790			Chr5	1035790	1037003	AT5G03870			Chr1	19703980	19707439	AT1G52905			Chr1	21729410	21732216	AT1G58520
	Chr1	3999157	4000024	AT1G11850		Chr1	4137511	4140158	AT1G12200		Chr1	2527170	2529120	AT1G08100		Chr1	2630891	2632871	AT1G08340		Chr2	14846591	14848509	AT2G35250			Chr3	23398968	23400824	AT3G63350			Chr5	26289114	26291168	AT5G00720			Chr2	1917143	1919578	AT2G05260
	Chr1	4021750	4023292	AT1G11915		Chr1	4162826	4165928	AT1G12260		Chr1	2548496	2551544	AT1G08135		Chr1	2658602	2661310	AT1G08430		Chr2	18593377	18596047	AT2G45100			Chr3	4927714	4932225	AT3G14670			Chr5	13361619	13362612	AT5G35100			Chr3	17515317	17518988	AT3G47530
	Chr1	4023533	4025113	AT1G11920		Chr1	4168884	4169086	AT1G04937		Chr1	2551935	2555229	AT1G08140		Chr1	2662967	2665584	AT1G08440		Chr1	29009041	29011648	AT1G77210			Chr5	947158	947758	AT5G03668			Chr1	17323799	17326708	AT1G47265			Chr2	9168892	9170102	AT2G21420
	Chr1	4025930	4026733	AT1G11925		Chr1	4260783	4261869	AT1G12490		Chr1	2556191	2559228	AT1G08150		Chr1	2675813	2679824	AT1G08465		Chr4	17791406	17792323	AT4G37840			Chr5	947158	947758	AT5G03670			Chr1	12651319	12653350	AT1G34550			Chr1	27239274	27241377	AT1G72350
	Chr1	4045619	4045855	AT1G11980		Chr1	4261918	4262359	AT1G04957		Chr1	2559413	2560432	AT1G08160		Chr1	2743761	2747967	AT1G08630		Chr3	2921739	2923249	AT3G09510			Chr3	377168	379368	AT3G02120			Chr1	8800850	8804224	AT1G25025			Chr4	1336976	1338321	AT4G03030
	Chr1	4046079	4049140	AT1G11990		Chr1	4272888	4274206	AT1G12540		Chr1	2561449	2562316	AT1G08165		Chr1	2760183	2761599	AT1G08670		Chr1	7238794	7239962	AT1G20823			Chr3	377168	379368	AT3G02125			Chr3	16239830	16241787	AT3G44703			Chr1	9175225	9178599	AT1G26558
	Chr1	4046079	4049140	AT1G11990		Chr1	4276505	4277969	AT1G12560		Chr1	2562769	2563706	AT1G08170		Chr1	2811989	2812782	AT1G08790		Chr5	5984992	5986829	AT5G18090			Chr1	10505715	10507405	AT1G29980			Chr1	18668654	18671913	AT1G50400			Chr4	14530817	14532786	AT4G29654
	Chr1	4056165	4057968	AT1G12010		Chr1	4277947	4281131	AT1G12570		Chr1	2609996	2613377	AT1G08290		Chr1	2841969	2846350	AT1G08860		Chr2	19251090	19254705	AT2G46860			Chr4	211343	213732	AT4G00460			Chr5	26787087	26790182	AT5G67120			Chr3	6485305	6487280	AT3G18820
	Chr1	4064485	4066344	AT1G12030		Chr1	4286204	4289069	AT1G12600		Chr1	2621860	2628594	AT1G08320		Chr1	2867203	2870745	AT1G08920		Chr2	19251090	19254705	AT2G46850			Chr4	18553415	18555090	AT4G40020			Chr1	21771643	21773658	AT1G58725			Chr4	7987642	7990247	AT4G13760
	Chr1	4068821	4069413	AT1G04923		Chr1	4298666	4299571	AT1G12630		Chr1	2630891	2632871	AT1G08340		Chr1	2888427	2890965	AT1G08990		Chr5	24214007	24215457	AT5G60140			Chr3	17447433	17448686	AT3G47350			Chr4	7523236	7526742	AT4G12810			Chr5	16407069	16407812	AT5G40940
	Chr1	4069992	4072681	AT1G12040		Chr1	4310969	4311519	AT1G12663		Chr1	2658602	2661310	AT1G08430		Chr1	2908611	2909032	AT1G09030		Chr1	27985426	27988736	AT1G74458			Chr5	17290331	17294384	AT5G43080			Chr1	19424653	19427130	AT1G52180			Chr5	23062960	23064029	AT5G57000
	Chr1	4076226	4077230	AT1G12060		Chr1	4308943	4309749	AT1G12660		Chr1	2662967	2665584	AT1G08440		Chr1	2929217	2931850	AT1G09080		Chr1	27985426	27988736	AT1G74460			Chr3	2374333	2376901	AT3G07420			Chr3	15779452	15782169	AT3G06705			Chr2	18593481	18598275	AT2G45100
	Chr1	4077498	4078095	AT1G12064		Chr1	4342209	4344875	AT1G12740		Chr1	2675813	2679824	AT1G08465		Chr1	2932739	2936586	AT1G09090		Chr5	17451694	17452816	AT5G43420			Chr4	405648	407311	AT4G00950			Chr2	14456727	14458857	AT2G34230			Chr1	10860804	10863241	AT1G30640
	Chr1	4078547	4080236	AT1G12070		Chr1	4366577	4367136	AT1G12805		Chr1	2743761	2747967	AT1G08630		Chr1	2932739	2936586	AT1G09090		Chr1	26662278	26662988	AT1G70710			Chr1	21729056	21732049	AT1G58525			Chr1	3780875	3785788	AT1G11270			Chr2	7566401	7570101	AT2G17430
	Chr1	4084162	4085185	AT1G12080		Chr1	4382160	4383673	AT1G12855		Chr1	2760183	2761599	AT1G08670		Chr1	2949621	2950989	AT1G09155		Chr5	26289074	26291647	AT5G00720			Chr1	21729056	21732049	AT1G58520			Chr1	18279137	18282561	AT1G49390			Chr1	29243924	29246067	AT1G77765
	Chr1	4089664	4090857	AT1G12090		Chr1	4416315	4418590	AT1G12940		Chr1	2811989	2812782	AT1G08790		Chr1	2956261	2962546	AT1G09170		Chr5	7559350	7560420	AT5G22740			Chr1	30316345	30319639	AT1G80660			Chr5	14546615	14549452	AT5G36900			Chr5	19831160	19832860	AT5G48905
	Chr1	4095246	4095883	AT1G12100		Chr1	4419714	4422684	AT1G12950		Chr1	2819065	2820478	AT1G08810		Chr1	2965023	2965972	AT1G09180		Chr2	17808117	17809558	AT2G42800			Chr4	12072826	12074330	AT4G23030			Chr3	3817280	3817901	AT3G11990			Chr1	21844022	21846683	AT1G59406
	Chr1	4105223	4109601	AT1G12110		Chr1	4422707	4423155	AT1G12960		Chr1	2841969	2846350	AT1G08860		Chr1	2984829	2986231	AT1G09240		Chr2	13092094	13094981	AT2G30730			Chr5	20760226	20762401	AT5G51060			Chr3	22029780	22032947	AT3G59640			Chr4	434001	434567	AT4G01010
	Chr1	4105223	4109601	AT1G12110		Chr1	4429718	4430965	AT1G12980		Chr1	2867203	2870745	AT1G08920		Chr1	3019639	3021443	AT1G09350		Chr1	27033858	27036789	AT1G71870			Chr3	4831597	4833554	AT3G14440			Chr4	519634	522314	AT4G01240			Chr5	19870704	19871401	AT5G49020
	Chr1	4118594	4120959	AT1G12130		Chr1	4474684	4478005	AT1G13130		Chr1	2888427	2890965	AT1G08990		Chr1	3021802	3022368	AT1G09360		Chr1	10849060	10853255	AT1G30610			Chr3	3835350	3838899	AT3G12040			Chr1	11102316	11104021	AT1G06407			Chr2	14455446	14458873	AT2G34230
	Chr1	4125990	4128310	AT1G12160		Chr1	4507221	4508528	AT1G13200		Chr1	2908611	2909032	AT1G09030		Chr1	3024877	3025539	AT1G09370		Chr1	5871685	5873341	AT1G17180			Chr1	7252062	7254170	AT1G20850			Chr1	11102316	11104021	AT1G31095			Chr3	5436489	5437857	AT3G16010
	Chr1	4130396	4131168	AT1G12180		Chr1	4550153	4551620	AT1G13290		Chr1	2929217	2931850	AT1G09080		Chr1	3026062	3029549	AT1G09380		Chr2	686597	689515	AT2G02550			Chr3	18254909	18255825	AT3G49230			Chr2	14858859	14861200	AT2G35280			Chr2	12207061	12210585	AT2G28520
	Chr1	4132967	4134094	AT1G12190		Chr1	4556878	4558793	AT1G13300		Chr1	2932739	2936586	AT1G09090		Chr1	3026062	3029549	AT1G09380		Chr3	5451702	5454544	AT3G16070			Chr5	26757866	26760932	AT5G67050			Chr3	8524889	8528349	AT3G23680			Chr2	19266875	19269244	AT2G46890
	Chr1	4135434	4135988	AT1G08885		Chr1	4587780	4588661	AT1G13370		Chr1	2949621	2950989	AT1G09155		Chr1	3033512	3035396	AT1G09400		Chr4	13921323	13923223	AT4G27980			Chr4	17819241	17820647	AT4G03465			Chr3	8524889	8528349	AT3G23685			Chr3	129163	130691	AT3G01345
	Chr1	4137511	4140158	AT1G12200		Chr1	4597567	4599141	AT1G13400		Chr1	2951635	2952490	AT1G09157		Chr1	3055231	3057543	AT1G09470		Chr4	13511733	13513201	AT4G26890			Chr3	8524360	8528328	AT3G23680			Chr1	20568035	20569469	AT1G55120			Chr3	9378424	9381358	AT3G25720
	Chr1	4128607	4129701	AT1G12170		Chr1	4604688	4606067	AT1G13420		Chr1	2956261	2962546	AT1G09170		Chr1	3057975	3060757	AT1G09480		Chr2	15797230	15800822	AT2G37670			Chr3	8524360	8528328	AT3G23685			Chr5	16848767	16850119	AT5G42170			Chr1	23295495	23297648	AT1G62895
	Chr1	4162826	4165928	AT1G12260		Chr1	4606500	4607780	AT1G13430		Chr1	2965023	2965972	AT1G09180		Chr1	3061170	3061743	AT1G09483		Chr5	18599962	18601612	AT5G45850			Chr3	8524360	8528328	AT3G23670			Chr5	21165468	21169814	AT5G52090			Chr2	11408915	11409349	AT2G08175
	Chr1	4168884	4169086	AT1G04937		Chr1	4647815	4649066	AT1G13590		Chr1	2984829	2986231	AT1G09240		Chr1	3066674	3068796	AT1G09500		Chr5	3978383	3979822	AT5G12300			Chr1	17812270	17816010	AT1G48260			Chr4	5604188	5606549	AT4G08780			Chr4	17403983	17404477	AT4G36925
	Chr1	4260783	4261869	AT1G12490		Chr1	4650606	4651549	AT1G13600		Chr1	3019639	3021443	AT1G09350		Chr1	3069357	3070910	AT1G09510		Chr2	12306298	12307796	AT2G28690			Chr3	4525818	4528286	AT3G13780			Chr5	17473891	17474555	AT5G43510			Chr3	16232516	16235750	AT3G44690
	Chr1	4261918	4262359	AT1G04957		Chr1	4658538	4659115	AT1G13605		Chr1	3021802	3022368	AT1G09360		Chr1	3070915	3072074	AT1G09520		Chr5	989281	990541	AT5G03760			Chr3	4525818	4528286	AT3G13782			Chr1	3891923	3894767	AT1G11590			Chr4	5165436	5170313	AT4G08170
	Chr1	4272888	4274206	AT1G12540		Chr1	4660778	4661331	AT1G13607		Chr1	3024877	3025539	AT1G09370		Chr1	3083820	3084222	AT1G04703		Chr4	6759195	6759965	AT4G11070			Chr1	1596202	1598551	AT1G05440			Chr1	11979754	11984780	AT1G33070			Chr1	8808696	8812652	AT1G25083
	Chr1	4276505	4277969	AT1G12560		Chr1	4661682	4662428	AT1G13608		Chr1	3026062	3029549	AT1G09380		Chr1	3086101	3087914	AT1G09540		Chr4	11670988	11673346	AT4G22030			Chr5	23372141	23376723	AT5G57690			Chr2	15389321	15392662	AT2G36710			Chr1	8808696	8812652	AT1G25097
	Chr1	4277947	4281131	AT1G12570		Chr1	4662698	4663253	AT1G13609		Chr1	3026062	3029549	AT1G09380		Chr1	3089576	3092327	AT1G09550		Chr2	11692571	11694962	AT2G27320			Chr5	23372141	23376723	AT5G57700			Chr3	1555613	1560032	AT3G05410			Chr2	15173630	15174305	AT2G36180
	Chr1	4286204	4289069	AT1G12600		Chr1	4663831	4666130	AT1G13610		Chr1	3055231	3057543	AT1G09470		Chr1	3131952	3132215	AT1G04717		Chr1	20252073	20254685	AT1G54240			Chr1	8815255	8818688	AT1G25112			Chr3	17418793	17419696	AT3G07695			Chr3	8002323	8004414	AT3G22590
	Chr1	4298666	4299571	AT1G12630		Chr1	4668366	4669471	AT1G13620		Chr1	3057975	3060757	AT1G09480		Chr1	3133008	3133674	AT1G09665		Chr3	20779467	20780997	AT3G55990			Chr1	8815255	8818688	AT1G25141			Chr5	5706822	5709294	AT5G17320			Chr1	22268491	22271352	AT1G60440
	Chr1	4310969	4311519	AT1G12663		Chr1	4680290	4682382	AT1G13650		Chr1	3061170	3061743	AT1G09483		Chr1	3168434	3171018	AT1G09790		Chr3	4790920	4793542	AT3G14360			Chr3	1546896	1548434	AT3G05390			Chr3	16141196	16144263	AT3G44550			Chr4	18229508	18233118	AT4G39140
	Chr1	4308943	4309749	AT1G12660		Chr1	4688018	4689265	AT1G13670		Chr1	3066674	3068796	AT1G09500		Chr1	3187442	3188854	AT1G09812		Chr3	698503	700957	AT3G03080			Chr3	17098072	17101408	AT3G46470			Chr2	1536579	1538153	AT2G04425			Chr5	609308	612005	AT5G02700
	Chr1	4312331	4312935	AT1G12665		Chr1	4690293	4692841	AT1G13680		Chr1	3069357	3070910	AT1G09510		Chr1	3204016	3205411	AT1G09860		Chr3	698503	700957	AT3G03090			Chr3	21229844	21231547	AT3G57380			Chr5	25967607	25968603	AT5G65005			Chr3	17579705	17582080	AT3G47690
	Chr1	4318309	4319090	AT1G12672		Chr1	4702657	4704694	AT1G13710		Chr1	3083820	3084222	AT1G04703		Chr1	3204309	3205338	AT1G04743		Chr5	9856944	9859566	AT5G04515			Chr4	13536479	13539364	AT4G26960			Chr3	14311853	14315773	AT3G42155			Chr3	4927657	4932265	AT3G14670
	Chr1	4338942	4339323	AT1G04967		Chr1	4810115	4814724	AT1G14040		Chr1	3086101	3087914	AT1G09540		Chr1	3212812	3213011	AT1G04747		Chr4	18121377	18124637	AT4G38830			Chr5	3943678	3946898	AT5G12200			Chr3	14311853	14315773	AT3G42160			Chr5	18206221	18209760	AT5G45095
	Chr1	4342209	4344875	AT1G12740		Chr1	4827961	4829587	AT1G14100		Chr1	3089576	3092327	AT1G09550		Chr1	3208712	3213468	AT1G09880		Chr1	7548221	7549509	AT1G21540			Chr2	8034987	8036939	AT2G18520			Chr2	11324905	11329029	AT2G26620			Chr2	10971618	10974474	AT2G25730
	Chr1	4366577	4367136	AT1G12805		Chr1	4830297	4831915	AT1G14110		Chr1	3131952	3132215	AT1G04717		Chr1	3214049	3217603	AT1G09890		Chr4	12698450	12700411	AT4G24600			Chr2	12657118	12660491	AT2G29605			Chr3	16876395	16878225	AT3G45910			Chr3	16240042	16241865	AT3G44703
	Chr1	4382160	4383673	AT1G12855		Chr1	4832651	4832858	AT1G05053		Chr1	3133008	3133674	AT1G09665		Chr1	3230450	3233259	AT1G09932		Chr2	19069717	19072065	AT2G46460			Chr1	27033820	27036612	AT1G71870			Chr5	14324696	14324986	AT5G36310			Chr1	21615233	21616304	AT1G09685
	Chr1	4416315	4418590	AT1G12940		Chr1	4833396	4835089	AT1G14120		Chr1	3168434	3171018	AT1G09790		Chr1	3233924	3235530	AT1G09935		Chr2	19069717	19072065	AT2G46455			Chr5	19700481	19701310	AT5G48595			Chr1	18110902	18111381	AT1G48953			Chr1	8823033	8827168	AT1G25155
	Chr1	4419714	4422684	AT1G12950		Chr1	4858450	4859661	AT1G14220		Chr1	3187442	3188854	AT1G09812		Chr1	3227490	3230257	AT1G09930		Chr1	24391480	24393611	AT1G65610			Chr1	28012952	28015046	AT1G74545			Chr5	22510731	22514375	AT5G55565			Chr1	1181065	1185221	AT1G04390
	Chr1	4422707	4423155	AT1G12960		Chr1	4868346	4871488	AT1G14250		Chr1	3212812	3213011	AT1G04747		Chr1	3243986	3247216	AT1G09960		Chr5	3517391	3519921	AT5G11080			Chr1	28012952	28015046	AT1G74540			Chr5	10282940	10284539	AT5G28295			Chr1	6210489	6211952	AT1G18050
	Chr1	4429718	4430965	AT1G12980		Chr1	4864881	4868011	AT1G14240		Chr1	3208712	3213468	AT1G09880		Chr1	3265886	3268823	AT1G10010		Chr1	20622270	20622897	AT1G08053			Chr4	15952468	15954736	AT4G33070			Chr4	12093048	12096802	AT4G23080			Chr1	22784709	22786808	AT1G61690
	Chr1	4457271	4457513	AT1G04987		Chr1	4931485	4933662	AT1G14420		Chr1	3214049	3217603	AT1G09890		Chr1	3284073	3287292	AT1G10060		Chr5	15344385	15345212	AT5G38378			Chr1	27717718	27720890	AT1G73700			Chr1	22356954	22359469	AT1G60720			Chr4	7176421	7181048	AT4G11960
	Chr1	4474684	4478005	AT1G13130		Chr1	4938754	4941332	AT1G14440		Chr1	3230450	3233259	AT1G09932		Chr1	3354243	3354856	AT1G10225		Chr1	28648729	28650763	AT1G76370			Chr5	26289264	26290829	AT5G00720			Chr1	22356954	22359469	AT1G60730			Chr2	16150443	16153434	AT2G38620
	Chr1	4507221	4508528	AT1G13200		Chr1	4974021	4975705	AT1G14540		Chr1	3233924	3235530	AT1G09935		Chr1	3360087	3360508	AT1G10250		Chr2	16172100	16174846	AT2G38680			Chr1	30139115	30139852	AT1G80120			Chr1	18647566	18649308	AT1G50350			Chr1	8740590	8742215	AT1G24706
	Chr1	4542168	4543970	AT1G13260		Chr1	4978922	4980466	AT1G14550		Chr1	3227490	3230257	AT1G09930		Chr1	3361410	3362012	AT1G04783		Chr5	16562399	16563670	AT5G41380			Chr1	1673885	1676809	AT1G05610			Chr5	23431299	23434997	AT5G57840			Chr5	17473801	17474565	AT5G43510
	Chr1	4547388	4548894	AT1G13280		Chr1	4989562	4992805	AT1G14580		Chr1	3240531	3241863	AT1G09950		Chr1	3377878	3380414	AT1G10300		Chr2	14906617	14907601	AT2G08735			Chr5	20127632	20130197	AT5G49590			Chr2	6645839	6650084	AT2G15300			Chr5	14945456	14948428	AT5G37630
	Chr1	4550153	4551620	AT1G13290		Chr1	4994639	4994874	AT1G05097		Chr1	3243986	3247216	AT1G09960		Chr1	3390322	3392633	AT1G10340		Chr1	3577327	3580474	AT1G10750			Chr5	23171893	23175442	AT5G57190			Chr5	8666247	8667619	AT5G03925			Chr4	16571666	16574150	AT4G34730
	Chr1	4556878	4558793	AT1G13300		Chr1	4996758	4997068	AT1G05103		Chr1	3265886	3268823	AT1G10010		Chr1	3400554	3402420	AT1G10380		Chr2	16176429	16177733	AT2G38690			Chr4	13512066	13513207	AT4G26890			Chr5	16898478	16902111	AT5G42260			Chr5	25967087	25968709	AT5G65000
	Chr1	4587780	4588661	AT1G13370		Chr1	4996867	4997187	AT1G05107		Chr1	3265886	3268823	AT1G10010		Chr1	3403132	3405920	AT1G10385		Chr5	16290686	16291669	AT5G40690			Chr1	22113884	22116909	AT1G60030			Chr5	14586917	14589887	AT5G05345			Chr5	25967087	25968709	AT5G65005
	Chr1	4597567	4599141	AT1G13400		Chr1	5000986	5003637	AT1G14600		Chr1	3284073	3287292	AT1G10060		Chr1	3406209	3406622	AT1G04787		Chr4	10267793	10271504	AT4G03005			Chr4	13653575	13655771	AT4G27260			Chr5	1654316	1655932	AT5G05560			Chr5	13465575	13467207	AT5G35200
	Chr1	4604688	4606067	AT1G13420		Chr1	5019800	5021653	AT1G14630		Chr1	3351923	3353122	AT1G10220		Chr1	3414823	3416474	AT1G10400		Chr1	26880236	26883894	AT1G71320			Chr4	18280273	18280795	AT4G39280			Chr4	8086525	8088967	AT4G13992			Chr5	6911884	6915798	AT5G20450
	Chr1	4606500	4607780	AT1G13430		Chr1	5058583	5061140	AT1G14700		Chr1	3354243	3354856	AT1G10225		Chr1	3449567	3451226	AT1G10480		Chr1	20851033	20851706	AT1G55770			Chr1	29075327	29077486	AT1G77380			Chr5	19831133	19832820	AT5G48905			Chr5	8519582	8522750	AT5G24810
	Chr1	4647815	4649066	AT1G13590		Chr1	5073031	5074798	AT1G14730		Chr1	3360087	3360508	AT1G10250		Chr1	3471456	3472674	AT1G10530		Chr4	14026555	14028699	AT4G28350			Chr1	5023540	5026974	AT1G14640			Chr5	17200623	17203649	AT5G42905			Chr2	2325688	2326553	AT2G05995
	Chr1	4648903	4649415	AT1G08905		Chr1	5073031	5074798	AT1G14730		Chr1	3361410	3362012	AT1G04783		Chr1	3472127	3472558	AT1G04803		Chr1	670053	672729	AT1G02965			Chr2	12753682	12755448	AT2G29920			Chr2	10435174	10437520	AT2G00790			Chr5	15344386	15345260	AT5G38378
	Chr1	4650606	4651549	AT1G13600		Chr1	5083676	5084342	AT1G14755		Chr1	3377878	3380414	AT1G10300		Chr1	3479066	3481041	AT1G10550		Chr4	10944370	10946042	AT4G06955			Chr2	12753682	12755448	AT2G29925			Chr1	2993286	2994039	AT1G09260			Chr2	10435326	10437523	AT2G00790
	Chr1	4658538	4659115	AT1G13605		Chr1	5084315	5085263	AT1G14760		Chr1	3390322	3392633	AT1G10340		Chr1	3484399	3486965	AT1G10560		Chr4	10944370	10946042	AT4G03025			Chr2	14958295	14960651	AT2G35615			Chr2	11692356	11694739	AT2G27320			Chr5	13876091	13879171	AT5G35700
	Chr1	4660778	4661331	AT1G13607		Chr1	5090809	5094152	AT1G14780		Chr1	3400554	3402420	AT1G10380		Chr1	3493770	3495244	AT1G10585		Chr5	26757844	26761049	AT5G67050			Chr5	23901405	23903696	AT5G59230			Chr5	5007934	5008549	AT5G15420			Chr1	780591	785198	AT1G03200
	Chr1	4661682	4662428	AT1G13608		Chr1	5132506	5133860	AT1G14880		Chr1	3403132	3405920	AT1G10385		Chr1	3496911	3499439	AT1G10586		Chr3	1038803	1039915	AT3G04010			Chr5	23901405	23903696	AT5G59240			Chr5	9392610	9397335	AT5G26580			Chr1	780591	785198	AT1G03210
	Chr1	4662698	4663253	AT1G13609		Chr1	5136874	5137982	AT1G14890		Chr1	3406209	3406622	AT1G04787		Chr1	3496911	3499439	AT1G10586		Chr1	6378819	6382277	AT1G18550			Chr1	707681	711755	AT1G03050			Chr2	13793433	13796244	AT2G32500			Chr5	20127596	20130288	AT5G49590
	Chr1	4663831	4666130	AT1G13610		Chr1	5152263	5153104	AT1G14930		Chr1	3414823	3416474	AT1G10400		Chr1	3501145	3501904	AT1G10588		Chr5	17726129	17727308	AT5G44050			Chr1	707681	711755	AT1G03055			Chr3	16070853	16073170	AT3G06835			Chr1	4966338	4967277	AT1G14518
	Chr1	4668366	4669471	AT1G13620		Chr1	5154537	5155564	AT1G14940		Chr1	3449567	3451226	AT1G10480		Chr1	3509001	3512321	AT1G10620		Chr3	8129697	8133626	AT3G22940			Chr3	21818607	21821674	AT3G59030			Chr3	16159245	16163213	AT3G44580			Chr4	14474796	14477856	AT4G29440
	Chr1	4669425	4673073	AT1G13630		Chr1	5157336	5158269	AT1G14950		Chr1	3471456	3472674	AT1G10530		Chr1	3515182	3518035	AT1G10640		Chr1	1194157	1195640	AT1G04425			Chr5	7383844	7385523	AT5G22310			Chr4	861155	865456	AT4G02795			Chr1	16870178	16871200	AT1G44575
	Chr1	4688018	4689265	AT1G13670		Chr1	5159192	5160179	AT1G14960		Chr1	3472127	3472558	AT1G04803		Chr1	3515182	3518035	AT1G10640		Chr3	22029824	22032917	AT3G59640			Chr2	8086996	8088140	AT2G18650			Chr3	16509102	16513013	AT3G45130			Chr5	10288175	10291971	AT5G00500
	Chr1	4690293	4692841	AT1G13680		Chr1	5191674	5192677	AT1G05153		Chr1	3479066	3481041	AT1G10550		Chr1	3523986	3526531	AT1G10650		Chr4	10690212	10691977	AT4G19645			Chr1	23830726	23833361	AT1G64210			Chr1	24835045	24835827	AT1G66570			Chr3	9974837	9977930	AT3G27040
	Chr1	4697501	4698167	AT1G05027		Chr1	5231345	5236886	AT1G15210		Chr1	3484399	3486965	AT1G10560		Chr1	3544913	3545614	AT1G10682		Chr5	23372134	23374698	AT5G57690			Chr3	7782966	7784472	AT3G22090			Chr2	1167173	1168865	AT2G03821			Chr4	6759162	6759893	AT4G11070
	Chr1	4702657	4704694	AT1G13710		Chr1	5272256	5274074	AT1G15320		Chr1	3493770	3495244	AT1G10585		Chr1	3538333	3543925	AT1G10680		Chr3	22254935	22255826	AT3G60220			Chr3	7782966	7784472	AT3G22100			Chr5	14024421	14027892	AT5G35890			Chr4	9927046	9928297	AT4G06755
	Chr1	4720243	4721342	AT1G13760		Chr1	5274271	5275602	AT1G15330		Chr1	3496911	3499439	AT1G10586		Chr1	3549920	3550848	AT1G10690		Chr1	19424706	19425459	AT1G52180			Chr2	18702264	18703222	AT2G45380			Chr1	21807885	21810180	AT1G59030			Chr1	8771804	8775723	AT1G24807
	Chr1	4741999	4742071	AT1G13840		Chr1	5280264	5281274	AT1G05157		Chr1	3501145	3501904	AT1G10588		Chr1	3558358	3560705	AT1G10710		Chr3	22200218	22201849	AT3G60110			Chr2	18702264	18703222	AT2G09610			Chr5	2391930	2396097	AT5G07570			Chr2	1572476	1574304	AT2G04515
	Chr1	4810115	4814724	AT1G14040		Chr1	5283268	5284736	AT1G15360		Chr1	3509001	3512321	AT1G10620		Chr1	3574312	3574830	AT1G10747		Chr1	4561209	4563223	AT1G13310			Chr2	2325716	2326570	AT2G05995			Chr1	4619022	4621598	AT1G13470			Chr3	17310927	17312201	AT3G46990
	Chr1	4827961	4829587	AT1G14100		Chr1	5292712	5293338	AT1G15385		Chr1	3515182	3518035	AT1G10640		Chr1	3574807	3578783	AT1G10750		Chr5	4576137	4577947	AT5G14200			Chr3	16983320	16984915	AT3G46220			Chr3	17515313	17518960	AT3G47530			Chr3	15954116	15957748	AT3G44265
	Chr1	4830297	4831915	AT1G14110		Chr1	5290582	5292582	AT1G15380		Chr1	3515182	3518035	AT1G10640		Chr1	3596264	3597847	AT1G10790		Chr4	9760878	9763523	AT4G02985			Chr3	16983320	16984915	AT3G46230			Chr3	8894372	8895409	AT3G24465			Chr1	11609787	11610596	AT1G32220
	Chr1	4832651	4832858	AT1G05053		Chr1	5309907	5314128	AT1G15460		Chr1	3538333	3543925	AT1G10680		Chr1	3623998	3625422	AT1G10875		Chr5	22108019	22109502	AT5G54450			Chr3	16983320	16984915	AT3G07365			Chr1	17726933	17727922	AT1G48050			Chr1	11609787	11610596	AT1G32225
	Chr1	4833396	4835089	AT1G14120		Chr1	5342090	5343876	AT1G15540		Chr1	3549920	3550848	AT1G10690		Chr1	3625623	3627082	AT1G10880		Chr3	1006572	1008839	AT3G03910			Chr5	2127186	2131092	AT5G06850			Chr2	17362688	17363731	AT2G41640			Chr5	2674382	2678169	AT5G08310
	Chr1	4858450	4859661	AT1G14220		Chr1	5344388	5346342	AT1G15550		Chr1	3558358	3560705	AT1G10710		Chr1	3667224	3669935	AT1G10980		Chr1	28188815	28189702	AT1G75090			Chr5	19252795	19255645	AT5G47460			Chr2	17362688	17363731	AT2G41650			Chr5	2674382	2678169	AT5G08320
	Chr1	4868346	4871488	AT1G14250		Chr1	5365512	5366497	AT1G15580		Chr1	3574312	3574830	AT1G10747		Chr1	3678981	3681032	AT1G11040		Chr4	11907421	11908528	AT4G22620			Chr5	19252795	19255645	AT5G47470			Chr1	21615372	21616310	AT1G09685			Chr3	5865674	5868411	AT3G17190
	Chr1	4864881	4868011	AT1G14240		Chr1	5367297	5368670	AT1G15590		Chr1	3574807	3578783	AT1G10750		Chr1	3690012	3694200	AT1G11070		Chr3	259809	261641	AT3G01710			Chr5	3102186	3105939	AT5G09950			Chr4	10526553	10529375	AT4G19240			Chr1	17304612	17306177	AT1G47220
	Chr1	4868346	4871488	AT1G14250		Chr1	5368923	5370344	AT1G15600		Chr1	3596264	3597847	AT1G10790		Chr1	3694328	3698013	AT1G11080		Chr1	29391787	29394617	AT1G78120			Chr1	1246369	1248729	AT1G04570			Chr5	9160574	9163602	AT5G26220			Chr3	22705494	22705993	AT3G61360
	Chr1	4902919	4903476	AT1G05067		Chr1	5370677	5371859	AT1G15610		Chr1	3598069	3598885	AT1G10800		Chr1	3710208	3712503	AT1G11110		Chr1	29391787	29394617	AT1G78110			Chr2	19459171	19462439	AT2G47430			Chr5	13591650	13593485	AT5G35375			Chr1	2992189	2994110	AT1G09260
	Chr1	4902989	4903303	AT1G05073		Chr1	5374755	5375910	AT1G15625		Chr1	3623998	3625422	AT1G10875		Chr1	3712971	3713735	AT1G11112		Chr5	20883857	20886640	AT5G51420			Chr4	1936682	1938787	AT4G04030			Chr1	257778	259009	AT1G04037			Chr5	19709339	19711038	AT5G48605
	Chr1	4938754	4941332	AT1G14440		Chr1	5376793	5378056	AT1G15630		Chr1	3625623	3627082	AT1G10880		Chr1	3718652	3719832	AT1G11125		Chr4	17037634	17038826	AT4G36000			Chr3	6019993	6021781	AT3G17600			Chr4	16075176	16077892	AT4G33390			Chr4	10049831	10054689	AT4G18150
	Chr1	4974021	4975705	AT1G14540		Chr1	5373459	5374575	AT1G15620		Chr1	3667224	3669935	AT1G10980		Chr1	3722708	3727450	AT1G11130		Chr2	13632848	13634883	AT2G32030			Chr1	3780868	3785825	AT1G11270			Chr1	29244098	29245890	AT1G77765			Chr4	18498831	18500212	AT4G39860
	Chr1	4978922	4980466	AT1G14550		Chr1	5378886	5380239	AT1G15640		Chr1	3678981	3681032	AT1G11040		Chr1	3740664	3744675	AT1G11170		Chr2	16366913	16368326	AT2G39210			Chr5	10283237	10284350	AT5G28295			Chr3	22377671	22378401	AT3G09465			Chr5	8565021	8566392	AT5G24900
	Chr1	4989562	4992805	AT1G14580		Chr1	5393407	5394639	AT1G15680		Chr1	3690012	3694200	AT1G11070		Chr1	3750066	3752780	AT1G11190		Chr1	28591906	28593075	AT1G76190			Chr4	16253790	16255649	AT4G33905			Chr1	255653	256661	AT1G08775			Chr3	155799	158734	AT3G01415
	Chr1	4994639	4994874	AT1G05097		Chr1	5451432	5452374	AT1G15840		Chr1	3694328	3698013	AT1G11080		Chr1	3755668	3756998	AT1G11210		Chr1	20131249	20132844	AT1G53903			Chr2	16020608	16024178	AT2G38255			Chr1	11322921	11326147	AT1G31640			Chr2	9691093	9695573	AT2G22780
	Chr1	4996758	4997068	AT1G05103		Chr1	5453245	5454088	AT1G15850		Chr1	3710208	3712503	AT1G11110		Chr1	3759862	3761461	AT1G11220		Chr3	10079242	10082907	AT3G27290			Chr3	6900043	6901177	AT3G19850			Chr5	5643918	5646869	AT5G17165			Chr5	9392584	9397331	AT5G26580
	Chr1	4996867	4997187	AT1G05107		Chr1	5570753	5573958	AT1G16290		Chr1	3712971	3713735	AT1G11112		Chr1	3763268	3764483	AT1G11230		Chr2	12753570	12755520	AT2G29920			Chr2	17092651	17096690	AT2G40955			Chr5	5643918	5646869	AT5G17167			Chr4	6516394	6520628	AT4G10550
	Chr1	5000986	5003637	AT1G14600		Chr1	5578265	5580730	AT1G16310		Chr1	3718652	3719832	AT1G11125		Chr1	3768521	3770102	AT1G11250		Chr2	12753570	12755520	AT2G29925			Chr2	17092651	17096690	AT2G40960			Chr5	26582188	26584319	AT5G66595			Chr5	18624670	18627727	AT5G45920
	Chr1	5019800	5021653	AT1G14630		Chr1	5598411	5601367	AT1G16380		Chr1	3740664	3744675	AT1G11170		Chr1	3766754	3769799	AT1G11240		Chr3	1795191	1796671	AT3G05980			Chr5	14324698	14325006	AT5G36310			Chr4	17080995	17082628	AT4G09245			Chr2	14108962	14110319	AT2G33290
	Chr1	5058583	5061140	AT1G14700		Chr1	5605044	5607498	AT1G16400		Chr1	3750066	3752780	AT1G11190		Chr1	3787318	3790935	AT1G11280		Chr1	11609427	11610673	AT1G32220			Chr4	1387846	1390774	AT4G03130			Chr4	6688769	6689904	AT4G10890			Chr4	6559807	6564084	AT4G10613
	Chr1	5073031	5074798	AT1G14730		Chr1	5608682	5612064	AT1G16410		Chr1	3755668	3756998	AT1G11210		Chr1	3827851	3831068	AT1G11370		Chr1	11609427	11610673	AT1G32225			Chr1	28247876	28250369	AT1G75260			Chr3	7803600	7806848	AT3G22125			Chr5	6341189	6342046	AT5G18990
	Chr1	5083676	5084342	AT1G14755		Chr1	5602786	5604770	AT1G16390		Chr1	3759862	3761461	AT1G11220		Chr1	3853184	3855507	AT1G11450		Chr2	18400837	18401310	AT2G44578			Chr5	16210856	16213657	AT5G40480			Chr3	7803600	7806848	AT3G22142			Chr1	7876217	7878337	AT1G22290
	Chr1	5084315	5085263	AT1G14760		Chr1	5651268	5652883	AT1G16530		Chr1	3763268	3764483	AT1G11230		Chr1	3856942	3859465	AT1G11460		Chr1	12361606	12366152	AT1G34015			Chr1	29063240	29065761	AT1G77330			Chr3	22815348	22816843	AT3G61660			Chr1	23509950	23510867	AT1G63410
	Chr1	5090809	5094152	AT1G14780		Chr1	5712022	5713752	AT1G16705		Chr1	3768521	3770102	AT1G11250		Chr1	3859662	3860604	AT1G11470		Chr3	10589544	10591055	AT3G28340			Chr5	22356594	22358207	AT5G55090			Chr5	3102050	3105857	AT5G09950			Chr1	29300682	29303923	AT1G77930
	Chr1	5124670	5126280	AT1G14860		Chr1	5734190	5737704	AT1G16760		Chr1	3766754	3769799	AT1G11240		Chr1	3862399	3864074	AT1G11475		Chr4	405478	407316	AT4G00950			Chr2	15104767	15105862	AT2G35950			Chr1	13065110	13066757	AT1G35500			Chr1	29300682	29303923	AT1G77932
	Chr1	5128344	5129731	AT1G14870		Chr1	5782455	5783840	AT1G16905		Chr1	3827851	3831068	AT1G11370		Chr1	3868884	3870525	AT1G11490		Chr1	18499588	18500670	AT1G49960			Chr1	19156326	19158366	AT1G51670			Chr1	24896891	24897867	AT1G66750			Chr5	16232757	16234225	AT5G40520
	Chr1	5132506	5133860	AT1G14880		Chr1	5785003	5785959	AT1G16910		Chr1	3844461	3846956	AT1G11420		Chr1	3870679	3871702	AT1G11500		Chr1	21316640	21318625	AT1G57560			Chr4	14041734	14043136	AT4G28390			Chr4	12768499	12769013	AT4G24770			Chr5	21357231	21358933	AT5G52655
	Chr1	5136874	5137982	AT1G14890		Chr1	5789679	5791752	AT1G16930		Chr1	3853184	3855507	AT1G11450		Chr1	3871723	3872929	AT1G11510		Chr4	14866188	14867750	AT4G30400			Chr4	17374378	17376153	AT4G36880			Chr3	20090250	20091428	AT3G08380			Chr5	7829014	7831571	AT5G23250
	Chr1	5152263	5153104	AT1G14930		Chr1	5791983	5793491	AT1G16940		Chr1	3856942	3859465	AT1G11460		Chr1	3873029	3873619	AT1G11520		Chr4	8501998	8503853	AT4G14800			Chr4	13110710	13112346	AT4G25750			Chr5	7637922	7640295	AT5G22860			Chr4	1443413	1444367	AT4G03290
	Chr1	5154537	5155564	AT1G14940		Chr1	5793905	5794197	AT1G16945		Chr1	3859662	3860604	AT1G11470		Chr1	3875442	3877323	AT1G11540		Chr4	8501998	8503853	AT4G14805			Chr3	259826	261784	AT3G01710			Chr1	8643899	8649263	AT1G24380			Chr3	15218387	15222044	AT3G43260
	Chr1	5157336	5158269	AT1G14950		Chr1	5795879	5796666	AT1G16950		Chr1	3868884	3870525	AT1G11490		Chr1	3881627	3882819	AT1G11560		Chr1	7823150	7823757	AT1G22160			Chr1	22594297	22595016	AT1G61260			Chr3	15880567	15884557	AT3G44130			Chr5	18578837	18579858	AT5G45800
	Chr1	5159192	5160179	AT1G14960		Chr1	5807200	5811610	AT1G16980		Chr1	3870679	3871702	AT1G11500		Chr1	3884342	3884960	AT1G11572		Chr5	22418926	22420655	AT5G55270			Chr5	1241459	1243349	AT5G04395			Chr3	5865636	5868477	AT3G17190			Chr5	9827416	9829656	AT5G27750
	Chr1	5171181	5171956	AT1G15010		Chr1	5817567	5819352	AT1G17010		Chr1	3871723	3872929	AT1G11510		Chr1	3888610	3890824	AT1G11580		Chr1	1875077	1877492	AT1G06148			Chr5	1241459	1243349	AT5G04400			Chr4	10033344	10035102	AT4G18080			Chr5	21584068	21584917	AT5G53200
	Chr1	5191674	5192677	AT1G05153		Chr1	5812728	5816662	AT1G17000		Chr1	3873029	3873619	AT1G11520		Chr1	3901950	3903895	AT1G11600		Chr1	5798747	5800640	AT1G16960			Chr1	3892209	3894601	AT1G11590			Chr4	10033344	10035102	AT4G18090			Chr2	18393403	18393761	AT2G44560
	Chr1	5192219	5192854	AT1G15085		Chr1	5820080	5822013	AT1G17020		Chr1	3875442	3877323	AT1G11540		Chr1	3905579	3906818	AT1G11608		Chr2	17903546	17905426	AT2G43050			Chr5	21667801	21668337	AT5G53410			Chr3	7342317	7344851	AT3G20950			Chr3	5137375	5141073	AT3G15260
	Chr1	5272256	5274074	AT1G15320		Chr1	5832094	5835488	AT1G17060		Chr1	3881627	3882819	AT1G11560		Chr1	3906862	3909338	AT1G11610		Chr1	7534216	7535281	AT1G21520			Chr1	3209241	3211924	AT1G09880			Chr3	8099064	8102905	AT3G22880			Chr1	2189190	2190529	AT1G07135
	Chr1	5274271	5275602	AT1G15330		Chr1	5865707	5867495	AT1G17150		Chr1	3884342	3884960	AT1G11572		Chr1	3910833	3911924	AT1G11620		Chr4	8470422	8472280	AT4G14750			Chr2	8647793	8648928	AT2G20030			Chr4	8420359	8424219	AT4G14700			Chr5	26582175	26583703	AT5G66595
	Chr1	5280264	5281274	AT1G05157		Chr1	5875295	5876620	AT1G17190		Chr1	3888610	3890824	AT1G11580		Chr1	3919237	3919869	AT1G11655		Chr5	16490465	16492334	AT5G41200			Chr1	3474518	3477757	AT1G10540			Chr4	8420359	8424219	AT4G06210			Chr5	23024820	23027737	AT5G56920
	Chr1	5283268	5284736	AT1G15360		Chr1	5878390	5880073	AT1G17200		Chr1	3901950	3903895	AT1G11600		Chr1	3928115	3931701	AT1G11670		Chr2	16020542	16024652	AT2G38255			Chr5	16722920	16725136	AT5G41780			Chr3	17495455	17495969	AT3G07765			Chr3	20987427	20991156	AT3G56670
	Chr1	5292712	5293338	AT1G15385		Chr1	5926636	5927784	AT1G17300		Chr1	3905579	3906818	AT1G11608		Chr1	3941103	3941459	AT1G11684		Chr4	12384639	12387224	AT4G23780			Chr2	666512	668510	AT2G02490			Chr5	16406659	16410413	AT5G40940			Chr3	20987427	20991156	AT3G56660
	Chr1	5290582	5292582	AT1G15380		Chr1	5927925	5928833	AT1G17310		Chr1	3906862	3909338	AT1G11610		Chr1	3941469	3942212	AT1G11690		Chr5	20007266	20011295	AT5G49340			Chr2	666512	668510	AT2G02493			Chr5	6171048	6171724	AT5G18570			Chr4	8420246	8423673	AT4G14695
	Chr1	5309907	5314128	AT1G15460		Chr1	5940292	5941525	AT1G17345		Chr1	3910833	3911924	AT1G11620		Chr1	3963054	3966850	AT1G11740		Chr5	20007266	20011295	AT5G49350			Chr5	21138908	21140284	AT5G52050			Chr5	10288165	10291985	AT5G00500			Chr4	8420246	8423673	AT4G14700
	Chr1	5309907	5314128	AT1G15460		Chr1	5977323	5981521	AT1G17420		Chr1	3919237	3919869	AT1G11655		Chr1	3973874	3974594	AT1G11765		Chr5	18527462	18530618	AT5G45670			Chr1	20851101	20851696	AT1G55770			Chr1	17341590	17342714	AT1G07347			Chr4	8420246	8423673	AT4G06210
	Chr1	5342090	5343876	AT1G15540		Chr1	6059389	6060851	AT1G17615		Chr1	3928115	3931701	AT1G11670		Chr1	3975607	3977379	AT1G11770		Chr3	4467770	4468778	AT3G13662			Chr1	8021419	8023633	AT1G22660			Chr2	16003191	16006310	AT2G38195			Chr3	10166647	10169191	AT3G27470
	Chr1	5344388	5346342	AT1G15550		Chr1	6089460	6090339	AT1G17700		Chr1	3963054	3966850	AT1G11740		Chr1	3975947	3977255	AT1G04887		Chr4	12255308	12257031	AT4G23493			Chr1	8021419	8023633	AT1G22670			Chr5	6324101	6325288	AT5G02935			Chr5	4967707	4971181	AT5G15300
	Chr1	5365512	5366497	AT1G15580		Chr1	6090405	6092027	AT1G17710		Chr1	3973874	3974594	AT1G11765		Chr1	3976839	3979237	AT1G11780		Chr5	13602466	13604734	AT5G35405			Chr2	6646666	6650715	AT2G15300			Chr5	6324101	6325288	AT5G18937			Chr1	28935787	28936338	AT1G09925
	Chr1	5367297	5368670	AT1G15590		Chr1	6120741	6122822	AT1G17770		Chr1	3975607	3977379	AT1G11770		Chr1	3985184	3987290	AT1G11800		Chr1	18436850	18438194	AT1G49790			Chr5	24748069	24751501	AT5G61550			Chr4	433996	434554	AT4G01010			Chr1	28935787	28936338	AT1G76990
	Chr1	5368923	5370344	AT1G15600		Chr1	6128823	6129508	AT1G17800		Chr1	3975947	3977255	AT1G04887		Chr1	3989763	3991066	AT1G11810		Chr1	693144	697278	AT1G03010			Chr4	10033288	10035075	AT4G18080			Chr3	4231457	4234163	AT3G13170			Chr4	5373050	5375679	AT4G05535
	Chr1	5370677	5371859	AT1G15610		Chr1	6130025	6131627	AT1G17810		Chr1	3976839	3979237	AT1G11780		Chr1	3999157	4000024	AT1G11850		Chr1	27475338	27478635	AT1G73050			Chr4	10033288	10035075	AT4G18090			Chr1	21872683	21874667	AT1G59540			Chr3	6770695	6772264	AT3G19515
	Chr1	5374755	5375910	AT1G15625		Chr1	6159126	6161615	AT1G17910		Chr1	3989763	3991066	AT1G11810		Chr1	4021750	4023292	AT1G11915		Chr3	22370109	22370727	AT3G09445			Chr1	1211240	1214818	AT1G04470			Chr4	6711500	6714143	AT4G10950			Chr4	16049562	16050646	AT4G33290
	Chr1	5376793	5378056	AT1G15630		Chr1	6177481	6179289	AT1G17950		Chr1	3999157	4000024	AT1G11850		Chr1	4023533	4025113	AT1G11920		Chr4	6311030	6312957	AT4G10115			Chr2	15067202	15069618	AT2G35890			Chr4	6711500	6714143	AT4G10955			Chr2	9830689	9834814	AT2G23093
	Chr1	5378886	5380239	AT1G15640		Chr1	6180865	6183806	AT1G17960		Chr1	4021750	4023292	AT1G11915		Chr1	4025930	4026733	AT1G11925		Chr3	18756908	18759153	AT3G50540			Chr1	6588006	6593170	AT1G19090			Chr2	10565823	10566484	AT2G24780			Chr5	15504662	15508178	AT5G00545
	Chr1	5373459	5374575	AT1G15620		Chr1	6209771	6211588	AT1G18050		Chr1	4023533	4025113	AT1G11920		Chr1	4045619	4045855	AT1G11980		Chr2	16742050	16745389	AT2G40095			Chr1	8829590	8833011	AT1G25180			Chr2	10806628	10807531	AT2G25370			Chr5	22146472	22150533	AT5G54520
	Chr1	5393407	5394639	AT1G15680		Chr1	6227217	6230194	AT1G18100		Chr1	4025930	4026733	AT1G11925		Chr1	4046079	4049140	AT1G11990		Chr5	24248874	24250834	AT5G60220			Chr1	2073674	2075719	AT1G06750			Chr1	6587971	6593252	AT1G19090			Chr3	22377599	22378415	AT3G09465
	Chr1	5451432	5452374	AT1G15840		Chr1	6228598	6229147	AT1G05383		Chr1	4045619	4045855	AT1G11980		Chr1	4056165	4057968	AT1G12010		Chr5	24248874	24250834	AT5G60230			Chr4	861289	865169	AT4G02795			Chr1	12443742	12447058	AT1G34170			Chr1	20226225	20227848	AT1G07947
	Chr1	5453245	5454088	AT1G15850		Chr1	6238839	6241510	AT1G18140		Chr1	4046079	4049140	AT1G11990		Chr1	4064485	4066344	AT1G12030		Chr3	5799927	5802337	AT3G17010			Chr4	5581611	5586287	AT4G08760			Chr2	762343	763351	AT2G02720			Chr1	20226225	20227848	AT1G54180
	Chr1	5508311	5511736	AT1G16060		Chr1	6262602	6263258	AT1G18193		Chr1	4056165	4057968	AT1G12010		Chr1	4068821	4069413	AT1G04923		Chr1	19574536	19578309	AT1G52560			Chr3	22715742	22718231	AT3G61390			Chr3	8046818	8048636	AT3G22770			Chr2	8574457	8576230	AT2G19870
	Chr1	5570753	5573958	AT1G16290		Chr1	6263682	6264925	AT1G18197		Chr1	4064485	4066344	AT1G12030		Chr1	4069992	4072681	AT1G12040		Chr5	16428689	16429814	AT5G41030			Chr2	16319663	16321533	AT2G39110			Chr3	8046818	8048636	AT3G22760			Chr4	17081003	17082275	AT4G09245
	Chr1	5570753	5573958	AT1G16290		Chr1	6265416	6267076	AT1G18200		Chr1	4068821	4069413	AT1G04923		Chr1	4069992	4072681	AT1G12040		Chr5	24973379	24975556	AT5G62170			Chr2	18285288	18288169	AT2G44230			Chr5	24530307	24531520	AT5G60964			Chr2	152056	153396	AT2G01310
	Chr1	5578265	5580730	AT1G16310		Chr1	6269849	6270159	AT1G05387		Chr1	4069992	4072681	AT1G12040		Chr1	4077498	4078095	AT1G12064		Chr2	14957965	14960659	AT2G35615			Chr5	585079	586841	AT5G02600			Chr2	6054304	6056877	AT2G14288			Chr5	17925894	17927619	AT5G44495
	Chr1	5598411	5601367	AT1G16380		Chr1	6271817	6272422	AT1G05397		Chr1	4069992	4072681	AT1G12040		Chr1	4078547	4080236	AT1G12070		Chr3	247058	250608	AT3G01670			Chr3	10222328	10225450	AT3G27600			Chr3	9899538	9902115	AT3G26860			Chr1	20194134	20194982	AT1G54100
	Chr1	5605044	5607498	AT1G16400		Chr1	6276777	6278258	AT1G18250		Chr1	4077498	4078095	AT1G12064		Chr1	4084162	4085185	AT1G12080		Chr1	9187655	9190758	AT1G26590			Chr3	6710457	6713413	AT3G19370			Chr5	7504261	7508644	AT5G22590			Chr1	18279132	18282629	AT1G49390
	Chr1	5608682	5612064	AT1G16410		Chr1	6297219	6298328	AT1G18290		Chr1	4078547	4080236	AT1G12070		Chr1	4089664	4090857	AT1G12090		Chr5	1205945	1208210	AT5G04310			Chr5	20993598	20995049	AT5G51670			Chr2	16008293	16010672	AT2G38220			Chr2	1536612	1540307	AT2G04430
	Chr1	5602786	5604770	AT1G16390		Chr1	6301200	6303956	AT1G18310		Chr1	4084162	4085185	AT1G12080		Chr1	4095246	4095883	AT1G12100		Chr4	16491514	16493883	AT4G34510			Chr4	17037942	17038815	AT4G36000			Chr1	4598985	4599188	AT1G13400			Chr4	2673561	2676408	AT4G05190
	Chr1	5651268	5652883	AT1G16530		Chr1	6315636	6316738	AT1G18350		Chr1	4089664	4090857	AT1G12090		Chr1	4105223	4109601	AT1G12110		Chr3	21906094	21908342	AT3G59270			Chr5	15548989	15552173	AT5G38840			Chr3	10114152	10114582	AT3G27329			Chr1	666831	671180	AT1G02960
	Chr1	5712022	5713752	AT1G16705		Chr1	6331398	6333856	AT1G18400		Chr1	4095246	4095883	AT1G12100		Chr1	4118594	4120959	AT1G12130		Chr5	7383343	7385680	AT5G22310			Chr1	4561083	4563138	AT1G13310			Chr1	20488727	20490056	AT1G54950			Chr5	7638165	7640537	AT5G22860
	Chr1	5734190	5737704	AT1G16760		Chr1	6336300	6342527	AT1G18410		Chr1	4105223	4109601	AT1G12110		Chr1	4125990	4128310	AT1G12160		Chr4	312317	314914	AT4G00750			Chr5	26772651	26773236	AT5G67080			Chr3	10254854	10255319	AT3G27680			Chr2	8035016	8036913	AT2G18520
	Chr1	5764807	5765798	AT1G16850		Chr1	6336300	6342527	AT1G18410		Chr1	4105223	4109601	AT1G12110		Chr1	4130396	4131168	AT1G12180		Chr1	613393	616265	AT1G02800			Chr3	9974788	9977980	AT3G27040			Chr4	2723396	2725099	AT4G05115			Chr1	29774276	29775284	AT1G79150
	Chr1	5785003	5785959	AT1G16910		Chr1	6374906	6376333	AT1G18520		Chr1	4118594	4120959	AT1G12130		Chr1	4128607	4129701	AT1G12170		Chr2	15859196	15862784	AT2G37880			Chr3	17652151	17653791	AT3G47840			Chr5	18380828	18383651	AT5G45350			Chr5	18009553	18012842	AT5G44635
	Chr1	5782455	5783840	AT1G16905		Chr1	6389399	6391386	AT1G18570		Chr1	4125990	4128310	AT1G12160		Chr1	4132967	4134094	AT1G12190		Chr2	15859196	15862784	AT2G37890			Chr5	23279730	23281123	AT5G57480			Chr4	2673643	2676568	AT4G05190			Chr5	18009553	18012842	AT5G44640
	Chr1	5789679	5791752	AT1G16930		Chr1	6450585	6453263	AT1G18710		Chr1	4130396	4131168	AT1G12180		Chr1	4137511	4140158	AT1G12200		Chr2	15859196	15862784	AT2G37870			Chr1	8800841	8804088	AT1G25025			Chr1	17873720	17874837	AT1G48370			Chr5	24526095	24527792	AT5G60945
	Chr1	5791983	5793491	AT1G16940		Chr1	6473370	6474048	AT1G18770		Chr1	4128607	4129701	AT1G12170		Chr1	4162826	4165928	AT1G12260		Chr1	28247555	28249975	AT1G75260			Chr5	2392069	2396187	AT5G07570			Chr1	29774275	29775321	AT1G79150			Chr5	24526095	24527792	AT5G60950
	Chr1	5793905	5794197	AT1G16945		Chr1	6471150	6471824	AT1G18760		Chr1	4132967	4134094	AT1G12190		Chr1	4168884	4169086	AT1G04937		Chr2	183966	184755	AT2G01422			Chr1	21690963	21692739	AT1G58390			Chr2	8959859	8964117	AT2G20815			Chr1	23037707	23040157	AT1G62310
	Chr1	5795879	5796666	AT1G16950		Chr1	6476258	6477235	AT1G18780		Chr1	4137511	4140158	AT1G12200		Chr1	4186624	4190342	AT1G12320		Chr1	23043863	23045815	AT1G62320			Chr3	129177	130653	AT3G01345			Chr5	9601383	9604912	AT5G27260			Chr5	23545685	23546682	AT5G58190
	Chr1	5807200	5811610	AT1G16980		Chr1	6478779	6480043	AT1G18790		Chr1	4162826	4165928	AT1G12260		Chr1	4257268	4259300	AT1G12480		Chr3	8751858	8756241	AT3G00430			Chr3	8870922	8873481	AT3G24430			Chr5	14702824	14704384	AT5G37150			Chr5	7755896	7759914	AT5G23110
	Chr1	5817567	5819352	AT1G17010		Chr1	6485515	6487153	AT1G18810		Chr1	4168884	4169086	AT1G04937		Chr1	4257863	4258637	AT1G04953		Chr3	8751858	8756241	AT3G24210			Chr3	6990243	6992808	AT3G20030			Chr1	5974721	5975867	AT1G05313			Chr1	4619025	4621553	AT1G13470
	Chr1	5820080	5822013	AT1G17020		Chr1	6489233	6494634	AT1G18830		Chr1	4186624	4190342	AT1G12320		Chr1	4260783	4261869	AT1G12490		Chr5	26772064	26773302	AT5G67080			Chr4	14952623	14954469	AT4G30640			Chr5	24525813	24527824	AT5G60950			Chr2	7278097	7280194	AT2G16770
	Chr1	5812728	5816662	AT1G17000		Chr1	6495844	6496491	AT1G18835		Chr1	4257268	4259300	AT1G12480		Chr1	4261918	4262359	AT1G04957		Chr5	25568608	25570185	AT5G63900			Chr1	2403363	2405913	AT1G07750			Chr2	6390283	6391612	AT2G14870			Chr3	22076177	22077465	AT3G59765
	Chr1	5832094	5835488	AT1G17060		Chr1	6508776	6509012	AT1G05447		Chr1	4257863	4258637	AT1G04953		Chr1	4272888	4274206	AT1G12540		Chr5	20792204	20793616	AT5G51160			Chr1	17429335	17431857	AT1G47497			Chr1	27674445	27675763	AT1G73603			Chr1	3891965	3894638	AT1G11590
	Chr1	5863109	5864059	AT1G17147		Chr1	6508797	6511397	AT1G18860		Chr1	4260783	4261869	AT1G12490		Chr1	4274531	4276031	AT1G12550		Chr3	21893604	21895602	AT3G59220			Chr4	14398097	14399522	AT4G29200			Chr3	22076165	22077195	AT3G59765			Chr4	18181298	18182847	AT4G39020
	Chr1	5865707	5867495	AT1G17150		Chr1	6554496	6555610	AT1G18970		Chr1	4261918	4262359	AT1G04957		Chr1	4276505	4277969	AT1G12560		Chr3	22129099	22130271	AT3G59900			Chr2	16943898	16944801	AT2G40580			Chr3	18018889	18020029	AT3G00850			Chr5	5008038	5008556	AT5G15420
	Chr1	5875295	5876620	AT1G17190		Chr1	6554683	6557974	AT1G18975		Chr1	4272888	4274206	AT1G12540		Chr1	4277947	4281131	AT1G12570		Chr5	22110250	22111493	AT5G54460			Chr3	20137966	20138947	AT3G54390			Chr2	16319733	16321532	AT2G39110			Chr2	1010432	1012951	AT2G03330
	Chr1	5878390	5880073	AT1G17200		Chr1	6552752	6554036	AT1G18960		Chr1	4274531	4276031	AT1G12550		Chr1	4286204	4289069	AT1G12600		Chr1	27717682	27720924	AT1G73700			Chr5	18584233	18585571	AT5G45810			Chr1	7876072	7878354	AT1G22290			Chr2	675571	679215	AT2G02520
	Chr1	5926636	5927784	AT1G17300		Chr1	6582066	6583601	AT1G19060		Chr1	4276505	4277969	AT1G12560		Chr1	4289883	4291017	AT1G12610		Chr4	16660717	16662319	AT4G34990			Chr5	10372450	10374445	AT5G28450			Chr2	19267638	19269175	AT2G46890			Chr1	22190630	22195511	AT1G60170
	Chr1	5927925	5928833	AT1G17310		Chr1	6614087	6615214	AT1G19160		Chr1	4277947	4281131	AT1G12570		Chr1	4298666	4299571	AT1G12630		Chr1	29708747	29711374	AT1G78980			Chr4	18121272	18124725	AT4G38830			Chr1	1316492	1320530	AT1G04700			Chr1	7217142	7220348	AT1G20780
	Chr1	5940292	5941525	AT1G17345		Chr1	6643942	6649375	AT1G19230		Chr1	4286204	4289069	AT1G12600		Chr1	4310969	4311519	AT1G12663		Chr5	22093263	22096546	AT5G54410			Chr4	17791469	17792293	AT4G37840			Chr1	27684702	27685272	AT1G73630			Chr2	17092336	17095637	AT2G40955
	Chr1	5977323	5981521	AT1G17420		Chr1	6650476	6653195	AT1G19250		Chr1	4289883	4291017	AT1G12610		Chr1	4308943	4309749	AT1G12660		Chr3	330096	333062	AT3G01990			Chr1	27979216	27980400	AT1G74440			Chr2	10540539	10544381	AT2G24755			Chr3	20349316	20353717	AT3G54930
	Chr1	6089460	6090339	AT1G17700		Chr1	6679281	6680252	AT1G19320		Chr1	4298666	4299571	AT1G12630		Chr1	4342209	4344875	AT1G12740		Chr3	330096	333062	AT3G02000			Chr1	27979216	27980400	AT1G09463			Chr1	20194185	20195050	AT1G54100			Chr3	17495460	17496098	AT3G07765
	Chr1	6090405	6092027	AT1G17710		Chr1	6700455	6700686	AT1G08935		Chr1	4310969	4311519	AT1G12663		Chr1	4366577	4367136	AT1G12805		Chr1	30316297	30320030	AT1G80660			Chr1	27475376	27478608	AT1G73050			Chr1	13217992	13220663	AT1G09225			Chr3	18018477	18020076	AT3G00850
	Chr1	6120741	6122822	AT1G17770		Chr1	6700756	6703368	AT1G19390		Chr1	4308943	4309749	AT1G12660		Chr1	4384304	4386651	AT1G12860		Chr2	1082	10360	AT2G01008			Chr2	10686964	10687664	AT2G08105			Chr1	17837212	17839080	AT1G48280			Chr3	18018477	18020076	AT3G48630
	Chr1	6128823	6129508	AT1G17800		Chr1	6718602	6719196	AT1G05503		Chr1	4342209	4344875	AT1G12740		Chr1	4387129	4389110	AT1G12870		Chr3	3885897	3887308	AT3G12190			Chr5	13201212	13201941	AT5G34885			Chr1	17837212	17839080	AT1G07483			Chr3	22370119	22370804	AT3G09445
	Chr1	6130025	6131627	AT1G17810		Chr1	6738484	6739734	AT1G19460		Chr1	4366577	4367136	AT1G12805		Chr1	4389678	4391344	AT1G12880		Chr3	3885897	3887308	AT3G12200			Chr3	2908426	2910881	AT3G09450			Chr3	5161277	5165061	AT3G15340			Chr3	16070816	16073141	AT3G06835
	Chr1	6159126	6161615	AT1G17910		Chr1	6741296	6742534	AT1G19470		Chr1	4382160	4383673	AT1G12855		Chr1	4416315	4418590	AT1G12940		Chr1	17430433	17431940	AT1G47497			Chr5	22093321	22096483	AT5G54410			Chr5	15810840	15814338	AT5G00570			Chr5	18919526	18921218	AT5G46630
	Chr1	6177481	6179289	AT1G17950		Chr1	6754665	6755684	AT1G19500		Chr1	4384304	4386651	AT1G12860		Chr1	4419714	4422684	AT1G12950		Chr5	25784416	25787796	AT5G64510			Chr2	794050	796517	AT2G02800			Chr5	10210115	10211914	AT5G28237			Chr5	22110175	22112642	AT5G54460
	Chr1	6180865	6183806	AT1G17960		Chr1	6756237	6757420	AT1G19510		Chr1	4387129	4389110	AT1G12870		Chr1	4422707	4423155	AT1G12960		Chr5	4898142	4900009	AT5G15120			Chr2	794050	796517	AT2G02795			Chr1	22084123	22085470	AT1G08287			Chr4	2722265	2724795	AT4G05330
	Chr1	6209771	6211588	AT1G18050		Chr1	6772084	6773131	AT1G19565		Chr1	4389678	4391344	AT1G12880		Chr1	4429718	4430965	AT1G12980		Chr1	29302080	29303628	AT1G77930			Chr4	14632905	14635993	AT4G29920			Chr1	22084123	22085470	AT1G59980			Chr1	20979790	20982857	AT1G56100
	Chr1	6227217	6230194	AT1G18100		Chr1	6781483	6782216	AT1G19610		Chr1	4416315	4418590	AT1G12940		Chr1	4459002	4460996	AT1G13080		Chr1	29302080	29303628	AT1G77932			Chr5	25210548	25211162	AT5G62770			Chr5	9936992	9940365	AT5G00490			Chr1	24835077	24835572	AT1G66570
	Chr1	6228598	6229147	AT1G05383		Chr1	6783803	6788175	AT1G19630		Chr1	4419714	4422684	AT1G12950		Chr1	4461738	4463469	AT1G13090		Chr2	19151543	19152925	AT2G46650			Chr1	520626	521648	AT1G02510			Chr5	19189426	19195127	AT5G47260			Chr2	9222262	9226046	AT2G21540
	Chr1	6238839	6241510	AT1G18140		Chr1	6784020	6785075	AT1G19620		Chr1	4422707	4423155	AT1G12960		Chr1	4463859	4465725	AT1G13100		Chr1	1824665	1828019	AT1G06020			Chr5	21165452	21169721	AT5G52090			Chr5	19189426	19195127	AT5G47280			Chr3	7870944	7873216	AT3G22260
	Chr1	6262602	6263258	AT1G18193		Chr1	6783803	6788175	AT1G19630		Chr1	4429718	4430965	AT1G12980		Chr1	4467094	4469033	AT1G13110		Chr1	1824665	1828019	AT1G06030			Chr4	11940967	11943667	AT4G22730			Chr5	7069774	7070898	AT5G20850			Chr1	20568834	20570765	AT1G55120
	Chr1	6263682	6264925	AT1G18197		Chr1	6788885	6791919	AT1G19640		Chr1	4459002	4460996	AT1G13080		Chr1	4474684	4478005	AT1G13130		Chr5	1241315	1243348	AT5G04395			Chr4	11940967	11943667	AT4G07095			Chr1	23566109	23569515	AT1G63540			Chr1	20568834	20570765	AT1G55130
	Chr1	6265416	6267076	AT1G18200		Chr1	6803486	6805092	AT1G19670		Chr1	4461738	4463469	AT1G13090		Chr1	4474684	4478005	AT1G13130		Chr5	1241315	1243348	AT5G04400			Chr1	22709106	22712187	AT1G61560			Chr3	21080430	21083924	AT3G56960			Chr2	12712979	12715682	AT2G29760
	Chr1	6266609	6268939	AT1G18210		Chr1	6833669	6836633	AT1G19780		Chr1	4463859	4465725	AT1G13100		Chr1	4507221	4508528	AT1G13200		Chr1	24437043	24438508	AT1G65710			Chr1	22709106	22712187	AT1G61562			Chr5	25770378	25772540	AT5G64450			Chr5	21142915	21145585	AT5G00650
	Chr1	6269670	6269807	AT1G18220		Chr1	6838120	6840313	AT1G19790		Chr1	4467094	4469033	AT1G13110		Chr1	4550153	4551620	AT1G13290		Chr4	14368964	14370406	AT4G29140			Chr3	10004612	10008442	AT3G27140			Chr5	10334244	10335635	AT5G28370			Chr4	14333486	14335503	AT4G29090
	Chr1	6269849	6270159	AT1G05387		Chr1	6852116	6852945	AT1G19830		Chr1	4474684	4478005	AT1G13130		Chr1	4556878	4558793	AT1G13300		Chr4	10033376	10035202	AT4G18080			Chr5	5985046	5986922	AT5G18090			Chr2	184004	184669	AT2G01422			Chr5	7553993	7555782	AT5G22740
	Chr1	6271817	6272422	AT1G05397		Chr1	6904963	6906028	AT1G19890		Chr1	4474684	4478005	AT1G13130		Chr1	4561028	4563160	AT1G13310		Chr4	10033376	10035202	AT4G18090			Chr3	16876388	16878066	AT3G45910			Chr2	11991069	11993366	AT2G28130			Chr5	7504513	7508957	AT5G22590
	Chr1	6276777	6278258	AT1G18250		Chr1	6906899	6908805	AT1G19900		Chr1	4507221	4508528	AT1G13200		Chr1	4587780	4588661	AT1G13370		Chr4	11958363	11959530	AT4G22758			Chr3	11259399	11263902	AT3G29340			Chr4	1387830	1390796	AT4G03130			Chr2	9431985	9434168	AT2G22190
	Chr1	6294160	6295372	AT1G18280		Chr1	6917020	6918138	AT1G19930		Chr1	4550153	4551620	AT1G13290		Chr1	4597567	4599141	AT1G13400		Chr2	14631818	14632942	AT2G34690			Chr4	11123680	11124943	AT4G20735			Chr3	22524509	22530084	AT3G60950			Chr1	25612977	25615262	AT1G68340
	Chr1	6297219	6298328	AT1G18290		Chr1	6918159	6921979	AT1G19940		Chr1	4556878	4558793	AT1G13300		Chr1	4604688	4606067	AT1G13420		Chr3	22258111	22261338	AT3G60238			Chr2	17808178	17809647	AT2G42800			Chr4	5799406	5803559	AT4G09070			Chr4	13472512	13473133	AT4G26730
	Chr1	6301200	6303956	AT1G18310		Chr1	6918159	6921979	AT1G19940		Chr1	4561028	4563160	AT1G13310		Chr1	4606500	4607780	AT1G13430		Chr5	19831088	19832992	AT5G48905			Chr5	25568680	25570256	AT5G63900			Chr4	5799406	5803559	AT4G09060			Chr1	10346845	10350292	AT1G29620
	Chr1	6315636	6316738	AT1G18350		Chr1	6927736	6928656	AT1G19960		Chr1	4587780	4588661	AT1G13370		Chr1	4624564	4626166	AT1G13490		Chr4	9833770	9834790	AT4G17670			Chr5	26607031	26610881	AT5G66658			Chr1	22269548	22272247	AT1G60450			Chr1	10346845	10350292	AT1G29630
	Chr1	6331398	6333856	AT1G18400		Chr1	6930261	6930985	AT1G19968		Chr1	4597567	4599141	AT1G13400		Chr1	4627789	4629169	AT1G13500		Chr5	14522663	14525730	AT5G36870			Chr5	26607031	26610881	AT5G66660			Chr2	10532643	10535538	AT2G24735			Chr2	19526278	19529362	AT2G47600
	Chr1	6336300	6342527	AT1G18410		Chr1	6957968	6959124	AT1G05523		Chr1	4604688	4606067	AT1G13420		Chr1	4629203	4630821	AT1G13510		Chr4	16075191	16077833	AT4G33390			Chr5	1206233	1207279	AT5G04310			Chr4	875047	877038	AT4G02000			Chr5	10034342	10037191	AT5G28040
	Chr1	6389399	6391386	AT1G18570		Chr1	6958010	6959148	AT1G20070		Chr1	4606500	4607780	AT1G13430		Chr1	4631633	4633299	AT1G13520		Chr3	2914833	2916690	AT3G09480			Chr5	22488239	22491301	AT5G55520			Chr2	15173680	15174340	AT2G36180			Chr5	20969393	20972470	AT5G51630
	Chr1	6449229	6449459	AT1G05407		Chr1	6962030	6965443	AT1G20080		Chr1	4622550	4624081	AT1G13480		Chr1	4633590	4635129	AT1G13530		Chr3	2914833	2916690	AT3G09490			Chr1	18625031	18626957	AT1G50280			Chr4	5581121	5586536	AT4G08760			Chr2	19433132	19433880	AT2G47350
	Chr1	6449436	6449681	AT1G05413		Chr1	6975339	6977267	AT1G20120		Chr1	4624564	4626166	AT1G13490		Chr1	4635463	4636805	AT1G13540		Chr4	15952668	15955565	AT4G33070			Chr4	6365743	6367629	AT4G10230			Chr4	29380	31286	AT4G00070			Chr2	6044068	6048528	AT2G14265
	Chr1	6450585	6453263	AT1G18710		Chr1	6981264	6983627	AT1G20132		Chr1	4627789	4629169	AT1G13500		Chr1	4647815	4649066	AT1G13590		Chr1	26539961	26540716	AT1G70420			Chr3	20905027	20906366	AT3G56380			Chr3	18488146	18488893	AT3G49845			Chr3	6990154	6993198	AT3G20030
	Chr1	6473370	6474048	AT1G18770		Chr1	6984042	6985703	AT1G20135		Chr1	4629203	4630821	AT1G13510		Chr1	4650606	4651549	AT1G13600		Chr3	2866396	2868188	AT3G09330			Chr1	5871993	5873139	AT1G17180			Chr4	11099436	11104219	AT4G20700			Chr1	21144610	21148051	AT1G56460
	Chr1	6471150	6471824	AT1G18760		Chr1	6977753	6980241	AT1G20130		Chr1	4631633	4633299	AT1G13520		Chr1	4662698	4663253	AT1G13609		Chr1	707566	711762	AT1G03050			Chr1	27066626	27068921	AT1G71920			Chr4	11099436	11104219	AT4G20703			Chr1	943948	946035	AT1G03770
	Chr1	6476258	6477235	AT1G18780		Chr1	6987272	6990362	AT1G20150		Chr1	4633590	4635129	AT1G13530		Chr1	4663831	4666130	AT1G13610		Chr1	707566	711762	AT1G03055			Chr3	18756982	18758749	AT3G50540			Chr2	16446668	16449921	AT2G39375			Chr4	6102512	6106548	AT4G09660
	Chr1	6478779	6480043	AT1G18790		Chr1	6996176	6997943	AT1G20180		Chr1	4635463	4636805	AT1G13540		Chr1	4668366	4669471	AT1G13620		Chr1	8021797	8024083	AT1G22670			Chr3	23042520	23046093	AT3G62270			Chr2	16446668	16449921	AT2G39380			Chr1	790278	792574	AT1G03230
	Chr1	6485515	6487153	AT1G18810		Chr1	7012113	7015216	AT1G20240		Chr1	4636984	4638330	AT1G13550		Chr1	4680290	4682382	AT1G13650		Chr2	1102924	1104124	AT2G03620			Chr1	5862942	5863479	AT1G17147			Chr5	2105366	2108023	AT5G06800			Chr1	21771532	21773893	AT1G58725
	Chr1	6489233	6494634	AT1G18830		Chr1	7025548	7029698	AT1G20290		Chr1	4647815	4649066	AT1G13590		Chr1	4688018	4689265	AT1G13670		Chr2	1102924	1104124	AT2G03630			Chr2	7941996	7943031	AT2G18260			Chr5	28636	29946	AT5G01080			Chr4	8620168	8623054	AT4G15096
	Chr1	6495844	6496491	AT1G18835		Chr1	7033657	7034881	AT1G20320		Chr1	4650606	4651549	AT1G13600		Chr1	4690293	4692841	AT1G13680		Chr3	2374415	2377731	AT3G07420			Chr5	23231332	23235476	AT5G57350			Chr2	17946186	17946414	AT2G43150			Chr3	19543976	19545310	AT3G52730
	Chr1	6508776	6509012	AT1G05447		Chr1	7046504	7047744	AT1G20360		Chr1	4658538	4659115	AT1G13605		Chr1	4702657	4704694	AT1G13710		Chr5	15755015	15756976	AT5G39365			Chr5	1354336	1356615	AT5G04700			Chr3	1161801	1167005	AT3G04380			Chr3	19543976	19545310	AT3G08285
	Chr1	6508797	6511397	AT1G18860		Chr1	7058194	7058310	AT1G20375		Chr1	4662698	4663253	AT1G13609		Chr1	4720243	4721342	AT1G13760		Chr2	987441	990976	AT2G03260			Chr3	1047772	1051518	AT3G04050			Chr5	7175433	7176058	AT5G21105			Chr5	19053682	19057617	AT5G46920
	Chr1	6554496	6555610	AT1G18970		Chr1	7061442	7065242	AT1G20380		Chr1	4663831	4666130	AT1G13610		Chr1	4726770	4730425	AT1G13790		Chr1	5958703	5962368	AT1G17400			Chr3	1047772	1051518	AT3G04040			Chr2	1572396	1574287	AT2G04515			Chr1	21995627	21996241	AT1G59780
	Chr1	6554683	6557974	AT1G18975		Chr1	7100502	7102915	AT1G20500		Chr1	4668366	4669471	AT1G13620		Chr1	4738441	4739345	AT1G13825		Chr2	10017977	10022507	AT2G23530			Chr3	1426229	1427856	AT3G05110			Chr5	24720264	24723814	AT5G61460			Chr1	21690964	21692961	AT1G58390
	Chr1	6552752	6554036	AT1G18960		Chr1	7108203	7110634	AT1G20530		Chr1	4680290	4682382	AT1G13650		Chr1	4739693	4741189	AT1G13830		Chr5	24303172	24306713	AT5G60440			Chr3	1426229	1427856	AT3G05100			Chr5	24720264	24723814	AT5G61470			Chr3	10136343	10137521	AT3G27390
	Chr1	6582066	6583601	AT1G19060		Chr1	7172515	7172835	AT1G20683		Chr1	4688018	4689265	AT1G13670		Chr1	4810115	4814724	AT1G14040		Chr5	5111305	5114730	AT5G15685			Chr1	24220924	24224566	AT1G65200			Chr4	13327247	13332257	AT4G26350			Chr2	12657080	12660560	AT2G29605
	Chr1	6614087	6615214	AT1G19160		Chr1	7173009	7173340	AT1G20687		Chr1	4690293	4692841	AT1G13680		Chr1	4827961	4829587	AT1G14100		Chr5	25967566	25968629	AT5G65005			Chr5	16490455	16492157	AT5G41200			Chr2	390597	391936	AT2G01880			Chr5	26613111	26613797	AT5G66670
	Chr1	6616602	6619006	AT1G19170		Chr1	7194172	7195609	AT1G20730		Chr1	4702657	4704694	AT1G13710		Chr1	4830297	4831915	AT1G14110		Chr3	21391824	21393796	AT3G57740			Chr5	2653866	2656269	AT5G08250			Chr1	28815521	28815973	AT1G76780			Chr5	24590196	24591384	AT5G61140
	Chr1	6619133	6619997	AT1G08925		Chr1	7197491	7198681	AT1G20735		Chr1	4726770	4730425	AT1G13790		Chr1	4832651	4832858	AT1G05053		Chr5	17535677	17538330	AT5G43660			Chr1	576559	580276	AT1G02670			Chr3	8673140	8675751	AT3G24000			Chr3	5161512	5165078	AT3G15340
	Chr1	6621777	6623668	AT1G19180		Chr1	7200332	7201737	AT1G20740		Chr1	4738441	4739345	AT1G13825		Chr1	4833396	4835089	AT1G14120		Chr1	20192758	20194879	AT1G54095			Chr1	4290248	4290979	AT1G12610			Chr5	1558738	1560319	AT5G05260			Chr1	2472800	2473303	AT1G07980
	Chr1	6623823	6624977	AT1G19190		Chr1	7220880	7222432	AT1G20790		Chr1	4739693	4741189	AT1G13830		Chr1	4835724	4837771	AT1G14130		Chr1	11964190	11966269	AT1G33020			Chr2	17360530	17362154	AT2G41640			Chr2	11408879	11409336	AT2G08175			Chr1	27684623	27685403	AT1G73630
	Chr1	6642907	6643372	AT1G05483		Chr1	7223476	7223713	AT1G05587		Chr1	4810115	4814724	AT1G14040		Chr1	4839801	4840823	AT1G14150		Chr1	11964190	11966269	AT1G33030			Chr1	7023465	7024343	AT1G20280			Chr3	19544572	19545340	AT3G08285			Chr2	9289540	9290471	AT2G21770
	Chr1	6642987	6643519	AT1G05487		Chr1	7223760	7224256	AT1G05593		Chr1	4815683	4815988	AT1G14048		Chr1	4840562	4841848	AT1G14160		Chr4	18553435	18555136	AT4G40020			Chr1	5596918	5600676	AT1G16370			Chr4	15815982	15816698	AT4G03335			Chr4	12093031	12096858	AT4G23080
	Chr1	6643942	6649375	AT1G19230		Chr1	7225434	7225775	AT1G05603		Chr1	4827961	4829587	AT1G14100		Chr1	4843184	4845913	AT1G14170		Chr3	933779	934698	AT3G03726			Chr1	5596918	5600676	AT1G16380			Chr5	3247480	3249835	AT5G10330			Chr5	9582480	9584563	AT5G27220
	Chr1	6650476	6653195	AT1G19250		Chr1	7226310	7227566	AT1G20795		Chr1	4830297	4831915	AT1G14110		Chr1	4847162	4849413	AT1G14180		Chr5	17864849	17865547	AT5G44350			Chr1	10787084	10789372	AT1G30473			Chr1	17573399	17577237	AT1G47765			Chr5	9582480	9584563	AT5G27230
	Chr1	6679281	6680252	AT1G19320		Chr1	7228718	7230240	AT1G20800		Chr1	4832651	4832858	AT1G05053		Chr1	4850117	4852096	AT1G14185		Chr1	23294089	23297246	AT1G62880			Chr1	10787084	10789372	AT1G30475			Chr1	21554994	21558148	AT1G58215			Chr4	16684408	16684803	AT4G35050
	Chr1	6700756	6703368	AT1G19390		Chr1	7231049	7231600	AT1G20803		Chr1	4833396	4835089	AT1G14120		Chr1	4852522	4854307	AT1G14190		Chr1	23294089	23297246	AT1G62895			Chr5	21419772	21421485	AT5G52860			Chr5	8368934	8370216	AT5G24510			Chr3	19389760	19392371	AT3G52280
	Chr1	6718602	6719196	AT1G05503		Chr1	7225309	7225588	AT1G05597		Chr1	4835724	4837771	AT1G14130		Chr1	4858450	4859661	AT1G14220		Chr5	23147620	23149161	AT5G57130			Chr3	2600158	2604456	AT3G08560			Chr1	18550573	18553679	AT1G50060			Chr1	18434158	18438185	AT1G49790
	Chr1	6738484	6739734	AT1G19460		Chr1	7253998	7258952	AT1G20860		Chr1	4839801	4840823	AT1G14150		Chr1	4868346	4871488	AT1G14250		Chr1	24931071	24933031	AT1G66830			Chr3	2600158	2604456	AT3G08570			Chr5	9635310	9637267	AT5G27340			Chr5	25869299	25871098	AT5G64710
	Chr1	6741296	6742534	AT1G19470		Chr1	7253998	7258952	AT1G20860		Chr1	4840562	4841848	AT1G14160		Chr1	4864881	4868011	AT1G14240		Chr3	11725742	11728747	AT3G29810			Chr4	16720696	16723550	AT4G35130			Chr1	1596268	1598987	AT1G05440			Chr1	21807724	21810177	AT1G59030
	Chr1	6754665	6755684	AT1G19500		Chr1	7259023	7261524	AT1G20870		Chr1	4843184	4845913	AT1G14170		Chr1	4931485	4933662	AT1G14420		Chr1	29214327	29215415	AT1G77730			Chr1	28189022	28189713	AT1G75090			Chr4	17212372	17214456	AT4G36460			Chr2	11058230	11059268	AT2G25930
	Chr1	6756237	6757420	AT1G19510		Chr1	7272526	7274072	AT1G20900		Chr1	4850117	4852096	AT1G14185		Chr1	4938754	4941332	AT1G14440		Chr4	11559312	11560328	AT4G21750			Chr2	18591628	18592445	AT2G45080			Chr1	13143610	13144945	AT1G35610			Chr4	5198671	5201436	AT4G08260
	Chr1	6763765	6765049	AT1G19530		Chr1	7274575	7275117	AT1G08945		Chr1	4852522	4854307	AT1G14190		Chr1	4966810	4967493	AT1G14518		Chr2	9055603	9059673	AT2G21130			Chr4	11134731	11139267	AT4G20790			Chr2	7566476	7570653	AT2G17430			Chr1	8643799	8649281	AT1G24380
	Chr1	6765653	6768290	AT1G19540		Chr1	7295274	7296518	AT1G20940		Chr1	4858450	4859661	AT1G14220		Chr1	4968134	4970311	AT1G14520		Chr1	17091493	17092317	AT1G07293			Chr5	26818990	26819804	AT5G67210			Chr1	4966300	4967378	AT1G14518			Chr1	3897502	3900052	AT1G11593
	Chr1	6772084	6773131	AT1G19565		Chr1	7330256	7332100	AT1G20990		Chr1	4868346	4871488	AT1G14250		Chr1	4974021	4975705	AT1G14540		Chr5	26021066	26022240	AT5G65140			Chr2	1084381	1087062	AT2G03567			Chr2	13160198	13160869	AT2G30920			Chr1	5898499	5901414	AT1G17255
	Chr1	6781483	6782216	AT1G19610		Chr1	7366590	7368203	AT1G21050		Chr1	4864881	4868011	AT1G14240		Chr1	4978922	4980466	AT1G14550		Chr4	18530622	18533564	AT4G39955			Chr1	12263000	12266438	AT1G33810			Chr2	14846610	14848704	AT2G35250			Chr3	17596066	17598860	AT3G47730
	Chr1	6783803	6788175	AT1G19630		Chr1	7389981	7391603	AT1G21110		Chr1	4931485	4933662	AT1G14420		Chr1	4989562	4992805	AT1G14580		Chr1	7876240	7878411	AT1G22290			Chr3	22458506	22459807	AT3G60760			Chr5	18418054	18421294	AT5G45460			Chr3	17596066	17598860	AT3G07805
	Chr1	6784020	6785075	AT1G19620		Chr1	7395179	7396823	AT1G21120		Chr1	4938754	4941332	AT1G14440		Chr1	4994639	4994874	AT1G05097		Chr1	28537904	28540481	AT1G76040			Chr3	10300153	10302482	AT3G05295			Chr1	17177996	17179170	AT1G45403			Chr1	20996691	21000295	AT1G56130
	Chr1	6788885	6791919	AT1G19640		Chr1	7404328	7405426	AT1G21140		Chr1	4966810	4967493	AT1G14518		Chr1	4996758	4997068	AT1G05103		Chr3	19182329	19184365	AT3G51710			Chr1	25720078	25723646	AT1G68540			Chr3	14324745	14327042	AT3G42180			Chr4	17498686	17502278	AT4G37170
	Chr1	6803486	6805092	AT1G19670		Chr1	7429895	7432477	AT1G21230		Chr1	4968134	4970311	AT1G14520		Chr1	4996867	4997187	AT1G05107		Chr2	8959878	8964201	AT2G20815			Chr3	6793404	6796213	AT3G19560			Chr1	20172483	20172716	AT1G54040			Chr1	7501911	7506240	AT1G21440
	Chr1	6833669	6836633	AT1G19780		Chr1	7434235	7436830	AT1G21240		Chr1	4974021	4975705	AT1G14540		Chr1	5019800	5021653	AT1G14630		Chr2	8171826	8175136	AT2G18876			Chr4	9497137	9499169	AT4G06430			Chr3	18108170	18112550	AT3G48835			Chr3	349016	349961	AT3G02040
	Chr1	6838120	6840313	AT1G19790		Chr1	7453735	7454256	AT1G21313		Chr1	4978922	4980466	AT1G14550		Chr1	5040754	5041967	AT1G14680		Chr2	8171826	8175136	AT2G18880			Chr2	12947912	12949578	AT2G30380			Chr1	13107006	13111548	AT1G35540			Chr2	15369729	15372077	AT2G36680
	Chr1	6852116	6852945	AT1G19830		Chr1	7453245	7455009	AT1G21310		Chr1	4989562	4992805	AT1G14580		Chr1	5045641	5046893	AT1G14686		Chr1	29263337	29264737	AT1G77815			Chr3	16548785	16552355	AT3G45200			Chr1	13107006	13111548	AT1G35545			Chr1	18640334	18642602	AT1G07623
	Chr1	6904963	6906028	AT1G19890		Chr1	7460104	7460501	AT1G05647		Chr1	4994639	4994874	AT1G05097		Chr1	5049526	5050983	AT1G14688		Chr2	16540652	16542679	AT2G39690			Chr1	23043109	23045420	AT1G62320			Chr1	29311876	29314374	AT1G77960			Chr1	18640334	18642602	AT1G07627
	Chr1	6906899	6908805	AT1G19900		Chr1	7462327	7466164	AT1G21320		Chr1	4996758	4997068	AT1G05103		Chr1	5051656	5055299	AT1G14690		Chr5	82437	85894	AT5G01215			Chr1	20979843	20982702	AT1G56100			Chr1	21254045	21255681	AT1G56690			Chr3	17585682	17589287	AT3G47700
	Chr1	6917020	6918138	AT1G19930		Chr1	7466694	7467359	AT1G21323		Chr1	4996867	4997187	AT1G05107		Chr1	5058583	5061140	AT1G14700		Chr5	82437	85894	AT5G01210			Chr4	16555558	16556519	AT4G34690			Chr2	7256311	7258558	AT2G16720			Chr1	20053300	20057330	AT1G53710
	Chr1	6918159	6921979	AT1G19940		Chr1	7473011	7473358	AT1G05657		Chr1	5000986	5003637	AT1G14600		Chr1	5061694	5065303	AT1G14710		Chr5	23901364	23903733	AT5G59230			Chr3	20989021	20991101	AT3G56670			Chr4	7381681	7384994	AT4G02895			Chr1	5798738	5800485	AT1G16960
	Chr1	6927736	6928656	AT1G19960		Chr1	7481184	7483513	AT1G21360		Chr1	5019800	5021653	AT1G14630		Chr1	5073031	5074798	AT1G14730		Chr5	23901364	23903733	AT5G59240			Chr5	18486004	18487654	AT5G45590			Chr2	11712409	11715813	AT2G27380			Chr2	11623707	11626513	AT2G27200
	Chr1	6930261	6930985	AT1G19968		Chr1	7516009	7517637	AT1G21470		Chr1	5040754	5041967	AT1G14680		Chr1	5073031	5074798	AT1G14730		Chr3	4525721	4528245	AT3G13780			Chr5	18743824	18747122	AT5G46240			Chr1	28013081	28016834	AT1G74545			Chr2	6813111	6816919	AT2G15630
	Chr1	6957968	6959124	AT1G05523		Chr1	7523972	7524721	AT1G21475		Chr1	5045641	5046893	AT1G14686		Chr1	5083676	5084342	AT1G14755		Chr3	4525721	4528245	AT3G13782			Chr3	4572188	4575613	AT3G13880			Chr1	28013081	28016834	AT1G74540			Chr5	10209666	10211924	AT5G28237
	Chr1	6958010	6959148	AT1G20070		Chr1	7543924	7544678	AT1G21529		Chr1	5049526	5050983	AT1G14688		Chr1	5084315	5085263	AT1G14760		Chr3	10166401	10169309	AT3G27470			Chr3	4572188	4575613	AT3G13882			Chr1	28013081	28016834	AT1G74550			Chr5	15583690	15585463	AT5G38930
	Chr1	6959160	6959605	AT1G05527		Chr1	7545149	7546988	AT1G21530		Chr1	5058583	5061140	AT1G14700		Chr1	5090809	5094152	AT1G14780		Chr3	3351507	3355970	AT3G10710			Chr1	24828517	24830088	AT1G66550			Chr3	23042472	23045632	AT3G62270			Chr5	17487602	17490665	AT5G43530
	Chr1	6961365	6961574	AT1G05533		Chr1	7548450	7550741	AT1G21540		Chr1	5073031	5074798	AT1G14730		Chr1	5124670	5126280	AT1G14860		Chr3	3351507	3355970	AT3G10720			Chr4	1371663	1375519	AT4G03100			Chr1	5897580	5899813	AT1G17240			Chr5	8665722	8667532	AT5G03925
	Chr1	6962030	6965443	AT1G20080		Chr1	7552987	7553975	AT1G21550		Chr1	5083676	5084342	AT1G14755		Chr1	5132506	5133860	AT1G14880		Chr3	4688458	4690266	AT3G14140			Chr2	4348418	4351928	AT2G11005			Chr4	6677109	6679613	AT4G10860			Chr4	8027880	8031094	AT4G13885
	Chr1	6975339	6977267	AT1G20120		Chr1	7667803	7670530	AT1G21850		Chr1	5084315	5085263	AT1G14760		Chr1	5136874	5137982	AT1G14890		Chr3	11259344	11263879	AT3G29340			Chr4	5371944	5375371	AT4G05535			Chr3	22502996	22504647	AT3G60910			Chr4	8027880	8031094	AT4G13880
	Chr1	6981264	6983627	AT1G20132		Chr1	7671028	7674215	AT1G21860		Chr1	5090809	5094152	AT1G14780		Chr1	5152263	5153104	AT1G14930		Chr3	5959488	5962173	AT3G17420			Chr1	8520475	8524541	AT1G24090			Chr3	22502996	22504647	AT3G60920			Chr1	13064672	13066739	AT1G35500
	Chr1	6984042	6985703	AT1G20135		Chr1	7675502	7675971	AT1G21864		Chr1	5090809	5094152	AT1G14780		Chr1	5154537	5155564	AT1G14940		Chr4	13110677	13112360	AT4G25750			Chr1	8520475	8524541	AT1G24095			Chr3	10394730	10396073	AT3G27990			Chr1	22562614	22563771	AT1G61200
	Chr1	6977753	6980241	AT1G20130		Chr1	7682584	7685662	AT1G21890		Chr1	5124670	5126280	AT1G14860		Chr1	5157336	5158269	AT1G14950		Chr4	13653567	13655808	AT4G27260			Chr5	4172960	4174967	AT5G13150			Chr3	10394730	10396073	AT3G27980			Chr5	1730050	1732164	AT5G05760
	Chr1	6996176	6997943	AT1G20180		Chr1	7696427	7697831	AT1G21910		Chr1	5132506	5133860	AT1G14880		Chr1	5159192	5160179	AT1G14960		Chr1	888784	889958	AT1G08825			Chr2	15389688	15391409	AT2G36710			Chr1	19716231	19718951	AT1G52940			Chr5	24109829	24111859	AT5G59845
	Chr1	7012113	7015216	AT1G20240		Chr1	7715170	7716975	AT1G21940		Chr1	5136874	5137982	AT1G14890		Chr1	5187549	5189673	AT1G15080		Chr4	211337	213772	AT4G00460			Chr2	8326166	8329925	AT2G19190			Chr5	4967836	4971646	AT5G15300			Chr1	29262646	29264183	AT1G77810
	Chr1	7032070	7033329	AT1G20310		Chr1	7723162	7723954	AT1G21950		Chr1	5152263	5153104	AT1G14930		Chr1	5231345	5236886	AT1G15210		Chr2	12946844	12950478	AT2G30380			Chr5	24942497	24945742	AT5G62110			Chr1	8894491	8896930	AT1G25360			Chr2	17946205	17946441	AT2G43150
	Chr1	7033657	7034881	AT1G20320		Chr1	7725972	7726586	AT1G21960		Chr1	5154537	5155564	AT1G14940		Chr1	5231345	5236886	AT1G15210		Chr1	18937841	18939586	AT1G51120			Chr3	16159108	16163140	AT3G44580			Chr3	22585650	22591190	AT3G61030			Chr1	13548261	13549429	AT1G36180
	Chr1	7043628	7044592	AT1G20350		Chr1	7727577	7729649	AT1G21970		Chr1	5157336	5158269	AT1G14950		Chr1	5268891	5272058	AT1G15310		Chr1	18937841	18939586	AT1G51130			Chr1	613429	616209	AT1G02800			Chr1	2513635	2516467	AT1G08070			Chr4	7129190	7133064	AT4G11850
	Chr1	7046504	7047744	AT1G20360		Chr1	7727577	7729649	AT1G21970		Chr1	5159192	5160179	AT1G14960		Chr1	5272256	5274074	AT1G15320		Chr2	11408858	11409388	AT2G08175			Chr3	7803804	7806888	AT3G22125			Chr2	10620607	10625003	AT2G24980			Chr3	8099268	8103416	AT3G22880
	Chr1	7058194	7058310	AT1G20375		Chr1	7740530	7742106	AT1G21990		Chr1	5231345	5236886	AT1G15210		Chr1	5274271	5275602	AT1G15330		Chr3	22159048	22162301	AT3G60000			Chr3	7803804	7806888	AT3G22142			Chr4	18582638	18584999	AT4G40100			Chr5	1559161	1560233	AT5G05260
	Chr1	7061442	7065242	AT1G20380		Chr1	7744094	7745744	AT1G22000		Chr1	5231345	5236886	AT1G15210		Chr1	5280264	5281274	AT1G05157		Chr2	16943564	16944811	AT2G40580			Chr3	8972278	8973774	AT3G24600			Chr3	14211239	14216483	AT3G00670			Chr4	15336920	15339926	AT4G31670
	Chr1	7100502	7102915	AT1G20500		Chr1	7750994	7753519	AT1G22015		Chr1	5268891	5272058	AT1G15310		Chr1	5283268	5284736	AT1G15360		Chr3	4927697	4932256	AT3G14670			Chr1	29282372	29285614	AT1G77860			Chr3	16898409	16903197	AT3G45990			Chr5	6171075	6171700	AT5G18570
	Chr1	7108203	7110634	AT1G20530		Chr1	7749571	7750062	AT1G22010		Chr1	5268891	5272058	AT1G15310		Chr1	5292712	5293338	AT1G15385		Chr3	6990092	6993465	AT3G20030			Chr1	29282372	29285614	AT1G77870			Chr2	8233348	8234034	AT2G18980			Chr5	7175477	7176065	AT5G21105
	Chr1	7172515	7172835	AT1G20683		Chr1	7792192	7795440	AT1G22080		Chr1	5272256	5274074	AT1G15320		Chr1	5290582	5292582	AT1G15380		Chr1	24848373	24850229	AT1G66600			Chr1	23639957	23640815	AT1G08623			Chr1	2156890	2158328	AT1G07025			Chr5	8368921	8369942	AT5G24510
	Chr1	7173009	7173340	AT1G20687		Chr1	7795708	7797425	AT1G22090		Chr1	5274271	5275602	AT1G15330		Chr1	5309907	5314128	AT1G15460		Chr1	24848373	24850229	AT1G66610			Chr1	23639957	23640815	AT1G08627			Chr4	14860497	14861051	AT4G30380			Chr3	8525365	8528556	AT3G23680
	Chr1	7194172	7195609	AT1G20730		Chr1	7798023	7800228	AT1G22100		Chr1	5280264	5281274	AT1G05157		Chr1	5309907	5314128	AT1G15460		Chr3	21532814	21534114	AT3G58150			Chr5	4576225	4578039	AT5G14200			Chr4	413394	416712	AT4G00960			Chr3	8525365	8528556	AT3G23685
	Chr1	7197491	7198681	AT1G20735		Chr1	7800507	7804061	AT1G22110		Chr1	5283268	5284736	AT1G15360		Chr1	5331858	5338326	AT1G15520		Chr5	23024736	23028979	AT5G56920			Chr3	5621932	5624336	AT3G16525			Chr4	4800906	4802594	AT4G07960			Chr5	26218884	26219981	AT5G65609
	Chr1	7200332	7201737	AT1G20740		Chr1	7806309	7809632	AT1G22120		Chr1	5292712	5293338	AT1G15385		Chr1	5342090	5343876	AT1G15540		Chr5	23024736	23028979	AT5G56930			Chr5	19839568	19842341	AT5G48940			Chr1	25246818	25249371	AT1G67390			Chr5	26218884	26219981	AT5G65610
	Chr1	7220880	7222432	AT1G20790		Chr1	7817609	7821576	AT1G22150		Chr1	5290582	5292582	AT1G15380		Chr1	5365512	5366497	AT1G15580		Chr2	8836090	8839598	AT2G20510			Chr4	14333500	14335251	AT4G29090			Chr1	25246818	25249371	AT1G67400			Chr4	13123773	13127709	AT4G25800
	Chr1	7223055	7223257	AT1G05583		Chr1	7841432	7844056	AT1G22210		Chr1	5309907	5314128	AT1G15460		Chr1	5367297	5368670	AT1G15590		Chr2	8836090	8839598	AT2G20515			Chr2	19069807	19072001	AT2G46460			Chr1	576944	580400	AT1G02670			Chr2	13091350	13094815	AT2G30730
	Chr1	7223476	7223713	AT1G05587		Chr1	7846459	7847836	AT1G22220		Chr1	5309907	5314128	AT1G15460		Chr1	5368923	5370344	AT1G15600		Chr4	15273745	15275224	AT4G31500			Chr2	19069807	19072001	AT2G46455			Chr4	16790431	16795600	AT4G35290			Chr2	1926791	1927888	AT2G04885
	Chr1	7223760	7224256	AT1G05593		Chr1	7852904	7855213	AT1G22240		Chr1	5331858	5338326	AT1G15520		Chr1	5370677	5371859	AT1G15610		Chr1	26145219	26147725	AT1G69540			Chr3	18148763	18150802	AT3G48950			Chr4	18181299	18182818	AT4G39020			Chr4	1936096	1938883	AT4G04030
	Chr1	7225434	7225775	AT1G05603		Chr1	7890259	7892118	AT1G22340		Chr1	5342090	5343876	AT1G15540		Chr1	5374755	5375910	AT1G15625		Chr4	11976015	11977264	AT4G22790			Chr4	8470484	8472144	AT4G14750			Chr4	1356819	1358880	AT4G03070			Chr2	6303238	6308411	AT2G14720
	Chr1	7226310	7227566	AT1G20795		Chr1	7894807	7897761	AT1G22360		Chr1	5344388	5346342	AT1G15550		Chr1	5373459	5374575	AT1G15620		Chr4	17032547	17033921	AT4G35985			Chr3	7565812	7566976	AT3G21473			Chr4	11090751	11094043	AT4G20650			Chr5	16898482	16902231	AT5G42260
	Chr1	7228718	7230240	AT1G20800		Chr1	7900355	7902427	AT1G22380		Chr1	5355737	5356794	AT1G05167		Chr1	5376793	5378056	AT1G15630		Chr1	19156291	19158346	AT1G51670			Chr5	24662011	24663072	AT5G61340			Chr4	11090751	11094043	AT4G20670			Chr5	15453994	15457977	AT5G38600
	Chr1	7231049	7231600	AT1G20803		Chr1	7903660	7906969	AT1G22400		Chr1	5356374	5356587	AT1G05173		Chr1	5378886	5380239	AT1G15640		Chr4	13472498	13473177	AT4G26730			Chr4	17821956	17824546	AT4G37900			Chr5	8601231	8602739	AT5G24960			Chr1	25246846	25249234	AT1G67390
	Chr1	7225309	7225588	AT1G05597		Chr1	7916076	7917518	AT1G22420		Chr1	5365512	5366497	AT1G15580		Chr1	5393407	5394639	AT1G15680		Chr1	1278265	1282247	AT1G04610			Chr1	13143441	13144949	AT1G35610			Chr1	20412196	20412805	AT1G07977			Chr1	25246846	25249234	AT1G67400
	Chr1	7253998	7258952	AT1G20860		Chr1	7922276	7925097	AT1G22440		Chr1	5367297	5368670	AT1G15590		Chr1	5425616	5426666	AT1G15760		Chr1	2197939	2199881	AT1G07160			Chr2	13413692	13416101	AT2G31500			Chr1	4812583	4815184	AT1G14040			Chr1	1289014	1290649	AT1G04625
	Chr1	7253998	7258952	AT1G20860		Chr1	7938195	7940805	AT1G22490		Chr1	5368923	5370344	AT1G15600		Chr1	5426708	5428280	AT1G15770		Chr1	2499124	2501416	AT1G08050			Chr5	16562811	16563618	AT5G41380			Chr1	19541368	19545534	AT1G52450			Chr1	1289014	1290649	AT1G04630
	Chr1	7272526	7274072	AT1G20900		Chr1	7949476	7950900	AT1G22500		Chr1	5370677	5371859	AT1G15610		Chr1	5428520	5429594	AT1G15772		Chr2	18495631	18498772	AT2G44840			Chr4	11317336	11321700	AT4G21220			Chr3	17840402	17843299	AT3G48205			Chr1	12334321	12339250	AT1G33950
	Chr1	7274575	7275117	AT1G08945		Chr1	7949502	7950049	AT1G05753		Chr1	5374755	5375910	AT1G15625		Chr1	5451432	5452374	AT1G15840		Chr2	18495631	18498772	AT2G09555			Chr4	11317336	11321700	AT4G21230			Chr1	12152601	12155420	AT1G33500			Chr5	15881998	15888416	AT5G39680
	Chr1	7295274	7296518	AT1G20940		Chr1	7976424	7978810	AT1G22570		Chr1	5373459	5374575	AT1G15620		Chr1	5453245	5454088	AT1G15850		Chr2	6043974	6047995	AT2G14265			Chr1	23743600	23745368	AT1G63990			Chr4	6952831	6955307	AT4G11430			Chr2	10795719	10799499	AT2G25350
	Chr1	7330256	7332100	AT1G20990		Chr1	7987141	7989217	AT1G22600		Chr1	5376793	5378056	AT1G15630		Chr1	5522602	5525452	AT1G16120		Chr5	23171884	23175440	AT5G57190			Chr3	1255329	1256813	AT3G04620			Chr1	4568514	4571927	AT1G13330			Chr3	20088711	20091349	AT3G54270
	Chr1	7366590	7368203	AT1G21050		Chr1	8024967	8026356	AT1G22680		Chr1	5378886	5380239	AT1G15640		Chr1	5525293	5528212	AT1G16130		Chr5	26713053	26714529	AT5G66890			Chr4	8501894	8503289	AT4G14800			Chr1	4568514	4571927	AT1G13340			Chr5	2391982	2396267	AT5G07570
	Chr1	7386762	7388512	AT1G21100		Chr1	8030587	8033156	AT1G22710		Chr1	5393407	5394639	AT1G15680		Chr1	5532298	5535060	AT1G16150		Chr1	24016618	24019081	AT1G64625			Chr4	8501894	8503289	AT4G14805			Chr4	5766866	5770483	AT4G08990			Chr5	1082976	1086644	AT5G04020
	Chr1	7389981	7391603	AT1G21110		Chr1	8044232	8045665	AT1G22720		Chr1	5425616	5426666	AT1G15760		Chr1	5570753	5573958	AT1G16290		Chr5	6913504	6916163	AT5G20460			Chr2	11713302	11715811	AT2G27380			Chr3	18227026	18229197	AT3G49170			Chr3	19752902	19754023	AT3G53270
	Chr1	7395179	7396823	AT1G21120		Chr1	8055325	8059060	AT1G22760		Chr1	5426708	5428280	AT1G15770		Chr1	5574257	5577622	AT1G16300		Chr5	9544645	9548143	AT5G27130			Chr1	26145223	26147757	AT1G69540			Chr1	11616797	11619462	AT1G32230			Chr1	17076806	17077854	AT1G45150
	Chr1	7404328	7405426	AT1G21140		Chr1	8071789	8075020	AT1G05767		Chr1	5428520	5429594	AT1G15772		Chr1	5578265	5580730	AT1G16310		Chr4	15457570	15458611	AT4G08585			Chr1	24016624	24019030	AT1G64625			Chr3	14948267	14953248	AT3G42870			Chr5	16977339	16979624	AT5G42450
	Chr1	7453735	7454256	AT1G21313		Chr1	8074231	8075037	AT1G22810		Chr1	5438171	5440131	AT1G15790		Chr1	5596633	5598447	AT1G16370		Chr3	17905555	17907326	AT3G48350			Chr2	12712992	12716002	AT2G29760			Chr4	5437498	5439694	AT4G08545			Chr5	17134717	17138126	AT5G42740
	Chr1	7453245	7455009	AT1G21310		Chr1	8103612	8104605	AT1G22900		Chr1	5451432	5452374	AT1G15840		Chr1	5598411	5601367	AT1G16380		Chr1	5045729	5047146	AT1G14686			Chr1	6557021	6560175	AT1G18975			Chr5	14060926	14063760	AT5G35926			Chr3	19784016	19786702	AT3G53360
	Chr1	7460104	7460501	AT1G05647		Chr1	8104993	8108361	AT1G22910		Chr1	5453245	5454088	AT1G15850		Chr1	5605044	5607498	AT1G16400		Chr1	10537810	10538740	AT1G30040			Chr1	6557021	6560175	AT1G18980			Chr5	15882002	15888770	AT5G39680			Chr2	8378311	8382998	AT2G19360
	Chr1	7462327	7466164	AT1G21320		Chr1	8139114	8140233	AT1G22990		Chr1	5522602	5525452	AT1G16120		Chr1	5608682	5612064	AT1G16410		Chr1	11957688	11961050	AT1G33010			Chr1	6557021	6560175	AT1G18990			Chr2	7503608	7507930	AT2G17260			Chr2	8378311	8382998	AT2G19365
	Chr1	7466694	7467359	AT1G21323		Chr1	8162414	8163149	AT1G23037		Chr1	5525293	5528212	AT1G16130		Chr1	5612150	5614020	AT1G16420		Chr2	16688529	16689925	AT2G39980			Chr3	18897108	18900049	AT3G50840			Chr3	19105089	19107798	AT3G51490			Chr1	22545205	22546520	AT1G61160
	Chr1	7468765	7469995	AT1G21326		Chr1	8173823	8175819	AT1G23070		Chr1	5532298	5535060	AT1G16150		Chr1	5602786	5604770	AT1G16390		Chr2	9168777	9170113	AT2G21420			Chr1	6398815	6399833	AT1G18590			Chr2	7306817	7311689	AT2G16870			Chr1	22545205	22546520	AT1G61150
	Chr1	7473011	7473358	AT1G05657		Chr1	8184925	8189234	AT1G23090		Chr1	5535766	5538501	AT1G16160		Chr1	5615808	5617672	AT1G16440		Chr2	10120329	10122051	AT2G23770			Chr4	6759257	6759919	AT4G11070			Chr3	3423587	3424580	AT3G10950			Chr3	2762696	2764272	AT3G09040
	Chr1	7481184	7483513	AT1G21360		Chr1	8198586	8199616	AT1G23120		Chr1	5570753	5573958	AT1G16290		Chr1	5638779	5640202	AT1G16500		Chr1	5090866	5091489	AT1G14780			Chr3	21894082	21895804	AT3G59220			Chr2	665560	671091	AT2G02490			Chr3	16140951	16144270	AT3G44550
	Chr1	7516009	7517637	AT1G21470		Chr1	8200321	8201246	AT1G23130		Chr1	5578265	5580730	AT1G16310		Chr1	5648636	5651167	AT1G16520		Chr5	20891109	20892430	AT5G51440			Chr4	10466269	10469260	AT4G19130			Chr2	665560	671091	AT2G02497			Chr4	10359269	10361054	AT4G18905
	Chr1	7523972	7524721	AT1G21475		Chr1	8202146	8203301	AT1G23140		Chr1	5596633	5598447	AT1G16370		Chr1	5651268	5652883	AT1G16530		Chr3	5464617	5467619	AT3G16120			Chr2	16172319	16175581	AT2G38680			Chr2	18505371	18509198	AT2G44880			Chr1	19761974	19763416	AT1G53035
	Chr1	7543924	7544678	AT1G21529		Chr1	8203933	8204318	AT1G23145		Chr1	5598411	5601367	AT1G16380		Chr1	5712022	5713752	AT1G16705		Chr3	5464617	5467619	AT3G16130			Chr3	15880567	15884327	AT3G44130			Chr2	18505371	18509198	AT2G44890			Chr5	25468011	25469886	AT5G63620
	Chr1	7545149	7546988	AT1G21530		Chr1	8205161	8205381	AT1G05793		Chr1	5605044	5607498	AT1G16400		Chr1	5734190	5737704	AT1G16760		Chr4	14830606	14831702	AT4G30300			Chr2	686710	689489	AT2G02550			Chr4	2415836	2416776	AT4G04965			Chr5	3658140	3660815	AT5G11460
	Chr1	7548450	7550741	AT1G21540		Chr1	8205872	8206243	AT1G23147		Chr1	5608682	5612064	AT1G16410		Chr1	5782455	5783840	AT1G16905		Chr3	15779450	15782572	AT3G06705			Chr3	6496370	6498995	AT3G18840			Chr1	22562275	22563747	AT1G61200			Chr4	12768495	12769213	AT4G24770
	Chr1	7552987	7553975	AT1G21550		Chr1	8206549	8207618	AT1G23150		Chr1	5612150	5614020	AT1G16420		Chr1	5785003	5785959	AT1G16910		Chr1	28935841	28938041	AT1G09925			Chr4	6573597	6575982	AT4G10640			Chr2	17277793	17281724	AT2G41450			Chr3	14211236	14216429	AT3G00670
	Chr1	7667803	7670530	AT1G21850		Chr1	8209226	8211486	AT1G23160		Chr1	5602786	5604770	AT1G16390		Chr1	5789679	5791752	AT1G16930		Chr1	28935841	28938041	AT1G76994			Chr4	6573597	6575982	AT4G10650			Chr2	7526439	7528078	AT2G17305			Chr2	17849947	17852761	AT2G42890
	Chr1	7671028	7674215	AT1G21860		Chr1	8227133	8229661	AT1G23200		Chr1	5615808	5617672	AT1G16440		Chr1	5791983	5793491	AT1G16940		Chr1	28935841	28938041	AT1G76990			Chr5	5591448	5594240	AT5G17010			Chr2	11549348	11550400	AT2G00810			Chr4	17789235	17789892	AT4G03425
	Chr1	7675502	7675971	AT1G21864		Chr1	8230047	8230978	AT1G23201		Chr1	5638779	5640202	AT1G16500		Chr1	5793905	5794197	AT1G16945		Chr5	22131526	22134164	AT5G54510			Chr3	968710	970881	AT3G03800			Chr5	16970002	16971137	AT5G42420			Chr5	23309776	23310610	AT5G57565
	Chr1	7677499	7677959	AT1G21866		Chr1	8233953	8235019	AT1G23205		Chr1	5648636	5651167	AT1G16520		Chr1	5795879	5796666	AT1G16950		Chr1	1884957	1886897	AT1G06170			Chr5	5111441	5114581	AT5G15685			Chr5	16237759	16240891	AT5G40540			Chr1	11102226	11104042	AT1G06407
	Chr1	7682584	7685662	AT1G21890		Chr1	8240145	8242261	AT1G23210		Chr1	5651268	5652883	AT1G16530		Chr1	5807200	5811610	AT1G16980		Chr4	7056321	7061754	AT4G11690			Chr5	5111441	5114581	AT5G15690			Chr5	9496802	9498242	AT5G27000			Chr1	11102226	11104042	AT1G31095
	Chr1	7696427	7697831	AT1G21910		Chr1	8252702	8254637	AT1G23240		Chr1	5651268	5652883	AT1G16530		Chr1	5817567	5819352	AT1G17010		Chr1	5644717	5645233	AT1G16510			Chr3	4688480	4690240	AT3G14140			Chr5	23886900	23890323	AT5G59200			Chr2	18505161	18508771	AT2G44880
	Chr1	7715170	7716975	AT1G21940		Chr1	8255127	8256770	AT1G23250		Chr1	5712022	5713752	AT1G16705		Chr1	5812728	5816662	AT1G17000		Chr3	4831558	4833568	AT3G14440			Chr2	16366753	16368332	AT2G39210			Chr5	23886900	23890323	AT5G59190			Chr1	10496458	10497849	AT1G29962
	Chr1	7723162	7723954	AT1G21950		Chr1	8262939	8266048	AT1G23300		Chr1	5726368	5727406	AT1G16730		Chr1	5820080	5822013	AT1G17020		Chr1	13218021	13220608	AT1G09225			Chr5	23147818	23149114	AT5G57130			Chr3	451679	453037	AT3G01125			Chr3	7565743	7569090	AT3G21473
	Chr1	7725972	7726586	AT1G21960		Chr1	8273423	8275350	AT1G23320		Chr1	5734190	5737704	AT1G16760		Chr1	5822309	5824464	AT1G17030		Chr1	4467265	4468998	AT1G13110			Chr3	9943956	9945382	AT3G26960			Chr4	17789225	17789800	AT4G03425			Chr3	7565743	7569090	AT3G21480
	Chr1	7727577	7729649	AT1G21970		Chr1	8283644	8286969	AT1G23340		Chr1	5785003	5785959	AT1G16910		Chr1	5832094	5835488	AT1G17060		Chr3	19812937	19816295	AT3G53450			Chr4	14720300	14723421	AT4G30110			Chr5	5737136	5740913	AT5G17420			Chr1	11265984	11267970	AT1G31480
	Chr1	7739696	7740012	AT1G05693		Chr1	8293020	8294264	AT1G23350		Chr1	5782455	5783840	AT1G16905		Chr1	5872024	5873124	AT1G17180		Chr5	23361667	23364810	AT5G57670			Chr5	21352442	21355001	AT5G52640			Chr5	1731137	1732232	AT5G01105			Chr3	19086635	19090364	AT3G51440
	Chr1	7739737	7739935	AT1G05697		Chr1	8297241	8302651	AT1G23380		Chr1	5789679	5791752	AT1G16930		Chr1	5875295	5876620	AT1G17190		Chr2	1010263	1012924	AT2G03330			Chr5	6545345	6547257	AT5G19410			Chr3	8819906	8820940	AT3G24315			Chr3	19086635	19090364	AT3G51430
	Chr1	7740530	7742106	AT1G21990		Chr1	8303208	8303425	AT1G05797		Chr1	5791983	5793491	AT1G16940		Chr1	5878390	5880073	AT1G17200		Chr1	1425559	1426393	AT1G05000			Chr4	11441023	11441694	AT4G21500			Chr3	11024106	11027054	AT3G29033			Chr3	18180003	18181770	AT3G49050
	Chr1	7744094	7745744	AT1G22000		Chr1	8303801	8304028	AT1G05803		Chr1	5793905	5794197	AT1G16945		Chr1	5920542	5921483	AT1G17285		Chr4	18547757	18548894	AT4G40010			Chr3	8672805	8675865	AT3G24000			Chr3	1960640	1961733	AT3G00210			Chr5	17428618	17430422	AT5G43401
	Chr1	7750994	7753519	AT1G22015		Chr1	8304660	8304901	AT1G05807		Chr1	5795879	5796666	AT1G16950		Chr1	5926636	5927784	AT1G17300		Chr4	16720212	16723544	AT4G09095			Chr5	24270680	24273651	AT5G60320			Chr1	23651592	23652272	AT1G63750			Chr3	11299179	11301388	AT3G29400
	Chr1	7749571	7750062	AT1G22010		Chr1	8311984	8315876	AT1G23400		Chr1	5807200	5811610	AT1G16980		Chr1	5927925	5928833	AT1G17310		Chr4	16720212	16723544	AT4G35130			Chr5	24270680	24273651	AT5G60335			Chr2	13973427	13977382	AT2G32940			Chr1	11710526	11713377	AT1G32440
	Chr1	7785708	7786477	AT1G22065		Chr1	8314853	8315737	AT1G23410		Chr1	5817567	5819352	AT1G17010		Chr1	5940292	5941525	AT1G17345		Chr4	16253401	16255642	AT4G33905			Chr1	29539268	29540673	AT1G78530			Chr1	11366085	11371125	AT1G31740			Chr1	4293078	4297045	AT1G12620
	Chr1	7792192	7795440	AT1G22080		Chr1	8317297	8319491	AT1G23420		Chr1	5820080	5822013	AT1G17020		Chr1	5960471	5962481	AT1G17400		Chr4	16571716	16574233	AT4G34730			Chr2	15679493	15682953	AT2G37370			Chr2	8568509	8569953	AT2G19850			Chr4	17212479	17214367	AT4G36460
	Chr1	7795708	7797425	AT1G22090		Chr1	8319663	8320431	AT1G05817		Chr1	5822309	5824464	AT1G17030		Chr1	5977323	5981521	AT1G17420		Chr5	8010020	8011649	AT5G23750			Chr5	6290624	6292845	AT5G18860			Chr2	987525	991072	AT2G03260			Chr2	14248390	14252359	AT2G33680
	Chr1	7798023	7800228	AT1G22100		Chr1	8339668	8341072	AT1G23500		Chr1	5812728	5816662	AT1G17000		Chr1	5977323	5981521	AT1G17420		Chr2	2325298	2326579	AT2G05995			Chr5	18096020	18097550	AT5G44820			Chr3	8789318	8790822	AT3G24255			Chr2	12118208	12123229	AT2G28355
	Chr1	7800507	7804061	AT1G22110		Chr1	8341388	8342796	AT1G23510		Chr1	5832094	5835488	AT1G17060		Chr1	6059389	6060851	AT1G17615		Chr5	20760179	20763202	AT5G51060			Chr5	23363344	23364378	AT5G57670			Chr1	18605522	18607664	AT1G50240			Chr1	18110860	18111331	AT1G48953
	Chr1	7806309	7809632	AT1G22120		Chr1	8343424	8344839	AT1G23520		Chr1	5872024	5873124	AT1G17180		Chr1	6089460	6090339	AT1G17700		Chr4	993265	995472	AT4G02280			Chr3	16509431	16512858	AT3G45130			Chr5	1501028	1504068	AT5G05085			Chr1	21461462	21463405	AT1G58025
	Chr1	7812211	7814345	AT1G22130		Chr1	8345595	8346733	AT1G23530		Chr1	5875295	5876620	AT1G17190		Chr1	6090405	6092027	AT1G17710		Chr1	23879929	23881289	AT1G64340			Chr5	1011005	1013574	AT5G03800			Chr5	1501028	1504068	AT5G05090			Chr3	17282043	17284907	AT3G46920
	Chr1	7817609	7821576	AT1G22150		Chr1	8346827	8350068	AT1G23540		Chr1	5878390	5880073	AT1G17200		Chr1	6100964	6105347	AT1G17745		Chr2	16150347	16153470	AT2G38620			Chr5	25297886	25300282	AT5G63070			Chr4	9508245	9513097	AT4G16900			Chr5	1384650	1386335	AT5G04780
	Chr1	7841432	7844056	AT1G22210		Chr1	8352615	8354619	AT1G23560		Chr1	5920542	5921483	AT1G17285		Chr1	6103076	6103654	AT1G05317		Chr5	6141875	6144150	AT5G18510			Chr2	15860608	15863791	AT2G37880			Chr1	511575	513191	AT1G02470			Chr2	13953793	13956120	AT2G32900
	Chr1	7846459	7847836	AT1G22220		Chr1	8357446	8358805	AT1G23580		Chr1	5926636	5927784	AT1G17300		Chr1	6120741	6122822	AT1G17770		Chr3	6704981	6707074	AT3G19350			Chr2	15860608	15863791	AT2G37890			Chr2	12117432	12123151	AT2G28355			Chr1	5781421	5782334	AT1G16900
	Chr1	7852904	7855213	AT1G22240		Chr1	8359125	8360645	AT1G23590		Chr1	5927925	5928833	AT1G17310		Chr1	6123567	6125339	AT1G17780		Chr1	1674087	1677144	AT1G05610			Chr5	815908	816638	AT5G03350			Chr4	2730244	2735618	AT4G05360			Chr2	16003120	16006062	AT2G38195
	Chr1	7886323	7889534	AT1G22330		Chr1	8360978	8362485	AT1G23600		Chr1	5940292	5941525	AT1G17345		Chr1	6128823	6129508	AT1G17800		Chr4	10049866	10054690	AT4G18150			Chr1	10662873	10664563	AT1G30280			Chr3	4187355	4190790	AT3G13065			Chr5	8601508	8602696	AT5G24960
	Chr1	7890259	7892118	AT1G22340		Chr1	8362864	8363675	AT1G23610		Chr1	5960471	5962481	AT1G17400		Chr1	6130025	6131627	AT1G17810		Chr2	7941808	7943257	AT2G18260			Chr1	10662873	10664563	AT1G30282			Chr1	1289036	1289723	AT1G04625			Chr1	28591959	28594520	AT1G76190
	Chr1	7894807	7897761	AT1G22360		Chr1	8363895	8364276	AT1G05823		Chr1	5962530	5962906	AT1G05307		Chr1	6131064	6135345	AT1G05333		Chr1	5227202	5227929	AT1G15190			Chr5	25967666	25968549	AT5G65005			Chr5	15692682	15694871	AT5G39190			Chr1	28591959	28594520	AT1G76200
	Chr1	7894807	7897761	AT1G22360		Chr1	8366941	8368381	AT1G23640		Chr1	5977323	5981521	AT1G17420		Chr1	6142402	6146521	AT1G17840		Chr5	5007990	5008540	AT5G15420			Chr3	4367643	4368620	AT3G13430			Chr5	15692682	15694871	AT5G39200			Chr4	9860623	9861872	AT4G17718
	Chr1	7897915	7900335	AT1G22370		Chr1	8369097	8370340	AT1G23645		Chr1	5977323	5981521	AT1G17420		Chr1	6159126	6161615	AT1G17910		Chr1	623723	625674	AT1G02820			Chr5	22110213	22111201	AT5G54460			Chr4	16571605	16574388	AT4G34730			Chr1	17004184	17007410	AT1G44980
	Chr1	7900355	7902427	AT1G22380		Chr1	8371020	8371106	AT1G23650		Chr1	6052936	6058114	AT1G17600		Chr1	6177481	6179289	AT1G17950		Chr1	623723	625674	AT1G02830			Chr5	16290719	16291703	AT5G40690			Chr4	1090	3894	AT4G00020			Chr1	9144317	9147266	AT1G26440
	Chr1	7903660	7906969	AT1G22400		Chr1	8373239	8375897	AT1G23670		Chr1	6054922	6058357	AT1G17610		Chr1	6180865	6183806	AT1G17960		Chr2	8418955	8423122	AT2G19440			Chr2	14468735	14470687	AT2G34270			Chr2	10461123	10462099	AT2G24615			Chr5	15785874	15787538	AT5G39450
	Chr1	7903660	7906969	AT1G22400		Chr1	8376687	8377156	AT1G23680		Chr1	6059389	6060851	AT1G17615		Chr1	6209771	6211588	AT1G18050		Chr4	14056668	14059744	AT4G28430			Chr2	14468735	14470687	AT2G34280			Chr1	19531520	19535356	AT1G52430			Chr4	6894699	6895408	AT4G11340
	Chr1	7916076	7917518	AT1G22420		Chr1	8377262	8378769	AT1G23690		Chr1	6089460	6090339	AT1G17700		Chr1	6227217	6230194	AT1G18100		Chr4	14056668	14059744	AT4G28420			Chr4	18185708	18188348	AT4G39030			Chr2	12712663	12715845	AT2G29760			Chr2	7881252	7885292	AT2G18130
	Chr1	7922276	7925097	AT1G22440		Chr1	8378972	8382290	AT1G23700		Chr1	6090405	6092027	AT1G17710		Chr1	6228598	6229147	AT1G05383		Chr1	5436747	5441691	AT1G15790			Chr1	7238802	7239290	AT1G20823			Chr3	17570989	17574022	AT3G47660			Chr1	5227227	5227945	AT1G15190
	Chr1	7932777	7933604	AT1G22470		Chr1	8354806	8356507	AT1G23570		Chr1	6100964	6105347	AT1G17745		Chr1	6235895	6238799	AT1G18130		Chr2	17634792	17637687	AT2G42340			Chr4	14830726	14831671	AT4G30300			Chr4	1485335	1490144	AT4G03380			Chr2	12857850	12859667	AT2G30115
	Chr1	7933973	7935382	AT1G22480		Chr1	8371609	8372845	AT1G23660		Chr1	6103076	6103654	AT1G05317		Chr1	6238839	6241510	AT1G18140		Chr1	29511659	29513217	AT1G78440			Chr1	7168286	7172109	AT1G20680			Chr3	3410196	3412010	AT3G10900			Chr2	16329460	16330488	AT2G39140
	Chr1	7938195	7940805	AT1G22490		Chr1	8378972	8382290	AT1G23700		Chr1	6120741	6122822	AT1G17770		Chr1	6262602	6263258	AT1G18193		Chr4	16852274	16853418	AT4G35480			Chr5	26530308	26531062	AT5G66440			Chr5	4465012	4465229	AT5G13825			Chr5	13591766	13593522	AT5G35375
	Chr1	7949476	7950900	AT1G22500		Chr1	8388297	8391623	AT1G23720		Chr1	6128823	6129508	AT1G17800		Chr1	6263682	6264925	AT1G18197		Chr4	16852274	16853418	AT4G35485			Chr1	28180063	28181788	AT1G75060			Chr1	25347437	25350136	AT1G67635			Chr1	20396067	20399836	AT1G54610
	Chr1	7949502	7950049	AT1G05753		Chr1	8388297	8391623	AT1G23720		Chr1	6130025	6131627	AT1G17810		Chr1	6265416	6267076	AT1G18200		Chr4	669991	672716	AT4G01540			Chr1	28180063	28181788	AT1G75050			Chr1	25347437	25350136	AT1G67630			Chr1	28855917	28857588	AT1G76870
	Chr1	7966500	7968692	AT1G22550		Chr1	8395466	8398387	AT1G23730		Chr1	6131064	6135345	AT1G05333		Chr1	6266609	6268939	AT1G18210		Chr2	6364343	6366783	AT2G14830			Chr4	8663324	8666032	AT4G15200			Chr5	5760659	5762048	AT5G17470			Chr1	6758740	6760892	AT1G19520
	Chr1	7976424	7978810	AT1G22570		Chr1	8401808	8404301	AT1G23760		Chr1	6142402	6146521	AT1G17840		Chr1	6269849	6270159	AT1G05387		Chr5	18096759	18097545	AT5G44820			Chr3	19316011	19317632	AT3G52080			Chr2	12857869	12859546	AT2G30115			Chr4	1298115	1299874	AT4G02930
	Chr1	7981722	7984334	AT1G22590		Chr1	8405214	8406266	AT1G23770		Chr1	6159126	6161615	AT1G17910		Chr1	6271817	6272422	AT1G05397		Chr5	25821827	25824374	AT5G64590			Chr2	17640958	17642959	AT2G42360			Chr1	25056779	25058647	AT1G67105			Chr1	1728699	1729875	AT1G05783
	Chr1	7987141	7989217	AT1G22600		Chr1	8417495	8418566	AT1G23810		Chr1	6177481	6179289	AT1G17950		Chr1	6276777	6278258	AT1G18250		Chr5	1955996	1959201	AT5G06400			Chr2	17640958	17642959	AT2G42365			Chr2	8413516	8414868	AT2G19420			Chr1	1728699	1729875	AT1G04427
	Chr1	8024967	8026356	AT1G22680		Chr1	8451068	8451289	AT1G23910		Chr1	6180865	6183806	AT1G17960		Chr1	6282233	6283348	AT1G18265		Chr1	23089034	23091475	AT1G62400			Chr4	7987880	7989730	AT4G13760			Chr5	17926136	17927110	AT5G44495			Chr3	451547	452847	AT3G01125
	Chr1	8030587	8033156	AT1G22710		Chr1	8461757	8469573	AT1G23935		Chr1	6227217	6230194	AT1G18100		Chr1	6297219	6298328	AT1G18290		Chr4	12916945	12917803	AT4G25200			Chr5	22721333	22722202	AT5G56120			Chr1	12554723	12559810	AT1G34390			Chr4	12018950	12020953	AT4G22930
	Chr1	8044232	8045665	AT1G22720		Chr1	8480422	8481599	AT1G23965		Chr1	6228598	6229147	AT1G05383		Chr1	6299669	6301139	AT1G18300		Chr5	21742630	21745934	AT5G53520			Chr4	11670996	11673374	AT4G22030			Chr3	16934113	16939816	AT3G46120			Chr2	6034617	6037580	AT2G14247
	Chr1	8055325	8059060	AT1G22760		Chr1	8495908	8496566	AT1G24000		Chr1	6235895	6238799	AT1G18130		Chr1	6301200	6303956	AT1G18310		Chr3	20745399	20746895	AT3G55930			Chr5	23412486	23413581	AT5G57790			Chr5	2112819	2116583	AT5G06820			Chr2	6034617	6037580	AT2G14255
	Chr1	8071789	8075020	AT1G05767		Chr1	8498803	8499517	AT1G24010		Chr1	6238839	6241510	AT1G18140		Chr1	6315636	6316738	AT1G18350		Chr3	20745399	20746895	AT3G55935			Chr5	10035072	10037070	AT5G28040			Chr2	14674108	14674615	AT2G34790			Chr3	18488021	18490022	AT3G49850
	Chr1	8074231	8075037	AT1G22810		Chr1	8500119	8502065	AT1G24020		Chr1	6262602	6263258	AT1G18193		Chr1	6325536	6330179	AT1G18390		Chr4	17622967	17625266	AT4G37490			Chr1	26880270	26883799	AT1G71320			Chr2	14674108	14674615	AT2G08685			Chr1	18329743	18331782	AT1G49520
	Chr1	8103612	8104605	AT1G22900		Chr1	8509736	8510056	AT1G24060		Chr1	6263682	6264925	AT1G18197		Chr1	6331398	6333856	AT1G18400		Chr1	29186104	29187813	AT1G77660			Chr2	676667	679202	AT2G02520			Chr2	6294452	6297981	AT2G14700			Chr2	10806717	10807413	AT2G25370
	Chr1	8104993	8108361	AT1G22910		Chr1	8510401	8510967	AT1G24062		Chr1	6265416	6267076	AT1G18200		Chr1	6336300	6342527	AT1G18410		Chr4	6258940	6260693	AT4G09990			Chr4	6711567	6713447	AT4G10950			Chr1	17303005	17306313	AT1G47220			Chr4	5799758	5803481	AT4G09070
	Chr1	8139114	8140233	AT1G22990		Chr1	8515506	8515971	AT1G24068		Chr1	6269849	6270159	AT1G05387		Chr1	6373265	6374090	AT1G18510		Chr4	6258940	6260693	AT4G10000			Chr1	13218066	13220444	AT1G09225			Chr3	21694182	21699764	AT3G58650			Chr3	8046347	8048620	AT3G22770
	Chr1	8147118	8149891	AT1G23010		Chr1	8516166	8519984	AT1G24070		Chr1	6271817	6272422	AT1G05397		Chr1	6374906	6376333	AT1G18520		Chr2	13327841	13329253	AT2G31270			Chr3	20679799	20681226	AT3G55720			Chr2	9047885	9048468	AT2G21100			Chr3	8046347	8048620	AT3G22760
	Chr1	8162414	8163149	AT1G23037		Chr1	8527714	8529018	AT1G24110		Chr1	6276777	6278258	AT1G18250		Chr1	6389399	6391386	AT1G18570		Chr5	3102161	3105947	AT5G09950			Chr2	10274217	10276930	AT2G24170			Chr1	10496211	10497843	AT1G29962			Chr1	12152601	12154711	AT1G33500
	Chr1	8164782	8166716	AT1G23040		Chr1	8534146	8535660	AT1G24130		Chr1	6282233	6283348	AT1G18265		Chr1	6450585	6453263	AT1G18710		Chr3	6165450	6166075	AT3G18020			Chr4	10267487	10271228	AT4G03005			Chr3	15764015	15768820	AT3G43940			Chr5	4987122	4990049	AT5G15360
	Chr1	8173823	8175819	AT1G23070		Chr1	8535999	8537780	AT1G24140		Chr1	6297219	6298328	AT1G18290		Chr1	6450585	6453263	AT1G18710		Chr2	14673982	14674613	AT2G34790			Chr2	14674083	14674608	AT2G34790			Chr5	26276457	26278867	AT5G65685			Chr3	10004514	10008444	AT3G27140
	Chr1	8198586	8199616	AT1G23120		Chr1	8542212	8543545	AT1G24147		Chr1	6301200	6303956	AT1G18310		Chr1	6473370	6474048	AT1G18770		Chr2	14673982	14674613	AT2G08685			Chr2	14674083	14674608	AT2G08685			Chr5	26276457	26278867	AT5G09435			Chr3	4494184	4495512	AT3G13720
	Chr1	8200321	8201246	AT1G23130		Chr1	8544248	8545590	AT1G24148		Chr1	6315636	6316738	AT1G18350		Chr1	6471150	6471824	AT1G18760		Chr5	18624701	18627752	AT5G45920			Chr5	927149	930761	AT5G03640			Chr3	2374377	2376714	AT3G07420			Chr1	22852892	22856883	AT1G61850
	Chr1	8202146	8203301	AT1G23140		Chr1	8578658	8582767	AT1G24220		Chr1	6325536	6330179	AT1G18390		Chr1	6474802	6475979	AT1G18773		Chr1	18647835	18649311	AT1G50350			Chr4	16694280	16695468	AT4G35070			Chr1	12334283	12339184	AT1G33950			Chr1	8778554	8781793	AT1G24851
	Chr1	8203933	8204318	AT1G23145		Chr1	8592078	8592989	AT1G24256		Chr1	6325873	6326732	AT1G18382		Chr1	6476258	6477235	AT1G18780		Chr5	18583770	18586130	AT5G45810			Chr4	10152642	10155451	AT4G18375			Chr5	16977265	16979512	AT5G42450			Chr2	7973900	7977832	AT2G18360
	Chr1	8205161	8205381	AT1G05793		Chr1	8593536	8596123	AT1G24260		Chr1	6325536	6330179	AT1G18390		Chr1	6478779	6480043	AT1G18790		Chr1	3209123	3212016	AT1G09880			Chr5	17176314	17177725	AT5G42830			Chr3	22860466	22864161	AT3G61760			Chr3	17840147	17843500	AT3G48205
	Chr1	8205872	8206243	AT1G23147		Chr1	8651407	8653915	AT1G24400		Chr1	6331398	6333856	AT1G18400		Chr1	6481113	6483646	AT1G18800		Chr5	21869063	21871499	AT5G53870			Chr3	20186934	20189495	AT3G54530			Chr5	19252666	19254060	AT5G47460			Chr2	8973010	8975108	AT2G20840
	Chr1	8206549	8207618	AT1G23150		Chr1	8650622	8650899	AT1G05897		Chr1	6336300	6342527	AT1G18410		Chr1	6485515	6487153	AT1G18810		Chr1	7208281	7209090	AT1G20750			Chr3	20779539	20781042	AT3G55990			Chr5	16801835	16806564	AT5G42010			Chr3	17870588	17872402	AT3G48250
	Chr1	8209226	8211486	AT1G23160		Chr1	8654945	8655662	AT1G24405		Chr1	6373265	6374090	AT1G18510		Chr1	6489233	6494634	AT1G18830		Chr1	24220920	24224621	AT1G65200			Chr2	16176854	16177707	AT2G38690			Chr5	17535709	17538347	AT5G43660			Chr3	19028273	19028603	AT3G51250
	Chr1	8227133	8229661	AT1G23200		Chr1	8658003	8659514	AT1G24430		Chr1	6374906	6376333	AT1G18520		Chr1	6495844	6496491	AT1G18835		Chr1	3471721	3472604	AT1G10530			Chr5	19612140	19615354	AT5G48390			Chr1	27354023	27356614	AT1G72660			Chr4	821802	824434	AT4G01900
	Chr1	8230047	8230978	AT1G23201		Chr1	8673914	8676408	AT1G24470		Chr1	6389399	6391386	AT1G18570		Chr1	6500050	6500381	AT1G05443		Chr1	3471721	3472604	AT1G04803			Chr4	16325284	16327684	AT4G34071			Chr1	20925503	20927438	AT1G55950			Chr1	27066524	27068987	AT1G71920
	Chr1	8233953	8235019	AT1G23205		Chr1	8676282	8676343	AT1G24475		Chr1	6450585	6453263	AT1G18710		Chr1	6500803	6504567	AT1G18840		Chr1	658343	662301	AT1G02920			Chr4	16325284	16327684	AT4G34090			Chr5	18412837	18414982	AT5G45440			Chr5	18379427	18383636	AT5G45350
	Chr1	8240145	8242261	AT1G23210		Chr1	8676360	8677228	AT1G24480		Chr1	6473370	6474048	AT1G18770		Chr1	6504677	6506542	AT1G18850		Chr1	658343	662301	AT1G02930			Chr4	16325284	16327684	AT4G34080			Chr1	13548120	13549379	AT1G36180			Chr1	29884642	29887316	AT1G79440
	Chr1	8252702	8254637	AT1G23240		Chr1	8678858	8681894	AT1G24485		Chr1	6471150	6471824	AT1G18760		Chr1	6508776	6509012	AT1G05447		Chr1	20118657	20120373	AT1G53885			Chr4	17093130	17097180	AT4G36120			Chr4	9178508	9180209	AT4G16215			Chr5	178765	182084	AT5G01440
	Chr1	8255127	8256770	AT1G23250		Chr1	8688563	8689268	AT1G24520		Chr1	6474802	6475979	AT1G18773		Chr1	6508797	6511397	AT1G18860		Chr4	6711508	6713477	AT4G10950			Chr4	6259085	6263060	AT4G09990			Chr1	17076845	17078647	AT1G45150			Chr2	9584506	9587769	AT2G22560
	Chr1	8262939	8266048	AT1G23300		Chr1	8692630	8694705	AT1G24530		Chr1	6476258	6477235	AT1G18780		Chr1	6515373	6519395	AT1G18870		Chr5	15810610	15814399	AT5G00570			Chr4	6259085	6263060	AT4G10000			Chr5	19708391	19711043	AT5G48600			Chr1	24350781	24354128	AT1G09775
	Chr1	8273423	8275350	AT1G23320		Chr1	8701112	8702477	AT1G24545		Chr1	6478779	6480043	AT1G18790		Chr1	6520941	6521124	AT1G18879		Chr2	16319628	16321503	AT2G39110			Chr5	9519753	9523577	AT5G27060			Chr2	9432298	9434124	AT2G22190			Chr1	8829690	8833098	AT1G25180
	Chr1	8283644	8286969	AT1G23340		Chr1	8699650	8701458	AT1G24540		Chr1	6481113	6483646	AT1G18800		Chr1	6522764	6526075	AT1G18890		Chr4	8127711	8132335	AT4G14103			Chr3	21080563	21084138	AT3G56960			Chr3	8369531	8374958	AT3G23380			Chr5	15662530	15663313	AT5G39120
	Chr1	8293020	8294264	AT1G23350		Chr1	8712478	8713225	AT1G24577		Chr1	6485515	6487153	AT1G18810		Chr1	6520721	6523368	AT1G18880		Chr5	3476829	3477440	AT5G10990			Chr1	4840167	4841984	AT1G14150			Chr4	48143	53390	AT4G00140			Chr4	12001887	12004335	AT4G22870
	Chr1	8297241	8302651	AT1G23380		Chr1	8714365	8715378	AT1G24590		Chr1	6489233	6494634	AT1G18830		Chr1	6543781	6545802	AT1G18940		Chr2	9453632	9456546	AT2G22240			Chr1	4840167	4841984	AT1G14160			Chr3	16230740	16235703	AT3G44690			Chr2	14674068	14674612	AT2G34790
	Chr1	8303208	8303425	AT1G05797		Chr1	8723627	8724711	AT1G24620		Chr1	6495844	6496491	AT1G18835		Chr1	6554496	6555610	AT1G18970		Chr5	4635833	4636445	AT5G14380			Chr2	8733473	8736397	AT2G20250			Chr4	12749758	12751164	AT4G24715			Chr2	14674068	14674612	AT2G08685
	Chr1	8303801	8304028	AT1G05803		Chr1	8734570	8737315	AT1G24650		Chr1	6500050	6500381	AT1G05443		Chr1	6554683	6557974	AT1G18975		Chr3	9128508	9130693	AT3G25060			Chr5	26774011	26775802	AT5G67090			Chr5	15583687	15585474	AT5G38930			Chr5	17498948	17503255	AT5G43560
	Chr1	8304660	8304901	AT1G05807		Chr1	8740205	8740469	AT1G24660		Chr1	6508776	6509012	AT1G05447		Chr1	6552752	6554036	AT1G18960		Chr1	29277245	29278454	AT1G77855			Chr1	8147914	8149364	AT1G23010			Chr5	9840064	9844371	AT5G27790			Chr2	7337508	7339202	AT2G16920
	Chr1	8305917	8306115	AT1G05813		Chr1	8757864	8759645	AT1G24735		Chr1	6508797	6511397	AT1G18860		Chr1	6568674	6570939	AT1G19025		Chr3	20137593	20139055	AT3G54390			Chr1	8643775	8649196	AT1G24380			Chr5	9840064	9844371	AT5G27800			Chr4	6839201	6839626	AT4G11220
	Chr1	8311984	8315876	AT1G23400		Chr1	8840203	8842445	AT1G25230		Chr1	6515373	6519395	AT1G18870		Chr1	6576077	6577413	AT1G19040		Chr1	5491427	5494234	AT1G15990			Chr3	5464990	5467786	AT3G16120			Chr5	10612085	10613412	AT5G28615			Chr3	3723018	3723763	AT3G11773
	Chr1	8314853	8315737	AT1G23410		Chr1	8843774	8844366	AT1G05937		Chr1	6520941	6521124	AT1G18879		Chr1	6582066	6583601	AT1G19060		Chr3	21560162	21561439	AT3G58200			Chr3	5464990	5467786	AT3G16130			Chr5	10612085	10613412	AT5G28620			Chr4	16882404	16886214	AT4G35560
	Chr1	8317297	8319491	AT1G23420		Chr1	8845142	8846726	AT1G25240		Chr1	6522764	6526075	AT1G18890		Chr1	6614087	6615214	AT1G19160		Chr5	18737688	18739718	AT5G46220			Chr5	3017081	3019995	AT5G09730			Chr2	7881354	7884953	AT2G18130			Chr3	18192681	18193216	AT3G49070
	Chr1	8319663	8320431	AT1G05817		Chr1	8849006	8849506	AT1G05943		Chr1	6520721	6523368	AT1G18880		Chr1	6623823	6624977	AT1G19190		Chr1	2929353	2930890	AT1G09080			Chr4	18527739	18529945	AT4G39952			Chr5	2579589	2579911	AT5G08055			Chr3	10421726	10426371	AT3G28030
	Chr1	8339668	8341072	AT1G23500		Chr1	8849034	8851790	AT1G25250		Chr1	6543781	6545802	AT1G18940		Chr1	6643942	6649375	AT1G19230		Chr5	26749926	26750783	AT5G67020			Chr3	3991384	3993696	AT3G12580			Chr4	9709013	9713611	AT4G17380			Chr5	2752237	2752672	AT5G08505
	Chr1	8341388	8342796	AT1G23510		Chr1	8852648	8853171	AT1G05947		Chr1	6554496	6555610	AT1G18970		Chr1	6650476	6653195	AT1G19250		Chr3	9378408	9381363	AT3G25720			Chr1	7548254	7549439	AT1G21540			Chr4	2330490	2330975	AT4G04620			Chr1	19716230	19719012	AT1G52940
	Chr1	8343424	8344839	AT1G23520		Chr1	8852719	8853071	AT1G05953		Chr1	6554683	6557974	AT1G18975		Chr1	6679281	6680252	AT1G19320		Chr1	520656	521682	AT1G02510			Chr5	14024783	14027543	AT5G35890			Chr4	9164164	9165022	AT4G16165			Chr5	14724604	14726719	AT5G37190
	Chr1	8345595	8346733	AT1G23530		Chr1	8857726	8859909	AT1G25270		Chr1	6552752	6554036	AT1G18960		Chr1	6700455	6700686	AT1G08935		Chr2	17548064	17549038	AT2G42060			Chr1	4478561	4480629	AT1G13140			Chr5	838025	839516	AT5G03400			Chr5	9739055	9743410	AT5G27600
	Chr1	8346827	8350068	AT1G23540		Chr1	8871568	8872386	AT1G25300		Chr1	6554683	6557974	AT1G18975		Chr1	6700756	6703368	AT1G19390		Chr5	24661923	24663046	AT5G61340			Chr1	4478561	4480629	AT1G13143			Chr3	20330745	20335819	AT3G54870			Chr1	13218021	13220748	AT1G09225
	Chr1	8352615	8354619	AT1G23560		Chr1	8874124	8874834	AT1G25310		Chr1	6557181	6558115	AT1G18980		Chr1	6714492	6716439	AT1G19410		Chr3	20808496	20812935	AT3G56080			Chr2	14553906	14558438	AT2G34555			Chr3	22223181	22227256	AT3G60160			Chr3	21080270	21083899	AT3G56960
	Chr1	8357446	8358805	AT1G23580		Chr1	8876312	8876558	AT1G05957		Chr1	6568674	6570939	AT1G19025		Chr1	6718602	6719196	AT1G05503		Chr1	6556222	6560223	AT1G18975			Chr3	1038913	1039519	AT3G04010			Chr5	23545570	23546091	AT5G58180			Chr2	16446693	16449877	AT2G39375
	Chr1	8359125	8360645	AT1G23590		Chr1	8880267	8882100	AT1G25330		Chr1	6576077	6577413	AT1G19040		Chr1	6738484	6739734	AT1G19460		Chr1	6556222	6560223	AT1G18980			Chr1	23293906	23297107	AT1G62880			Chr5	14598720	14603749	AT5G36960			Chr2	16446693	16449877	AT2G39380
	Chr1	8360978	8362485	AT1G23600		Chr1	8877790	8880388	AT1G25320		Chr1	6582066	6583601	AT1G19060		Chr1	6740500	6740591	AT1G19464		Chr1	6556222	6560223	AT1G18990			Chr1	23293906	23297107	AT1G62895			Chr3	6495884	6499231	AT3G18840			Chr5	5561043	5564765	AT5G16910
	Chr1	8362864	8363675	AT1G23610		Chr1	8885020	8886777	AT1G25340		Chr1	6614087	6615214	AT1G19160		Chr1	6741296	6742534	AT1G19470		Chr5	1410269	1415385	AT5G04860			Chr1	5098438	5102005	AT1G14800			Chr4	13316428	13317311	AT4G26320			Chr5	14546668	14549142	AT5G36900
	Chr1	8363895	8364276	AT1G05823		Chr1	8914191	8915219	AT1G25410		Chr1	6621777	6623668	AT1G19180		Chr1	6754665	6755684	AT1G19500		Chr5	9160536	9163967	AT5G26220			Chr3	10165854	10168947	AT3G27470			Chr1	16640257	16642203	AT1G07203			Chr1	5033729	5036999	AT1G14660
	Chr1	8366941	8368381	AT1G23640		Chr1	8918789	8919892	AT1G25422		Chr1	6623823	6624977	AT1G19190		Chr1	6756237	6757420	AT1G19510		Chr4	14530812	14534314	AT4G29654			Chr1	23891099	23892018	AT1G64380			Chr5	14331275	14332401	AT5G36340			Chr5	21352421	21354221	AT5G52640
	Chr1	8369097	8370340	AT1G23645		Chr1	8922416	8923879	AT1G25425		Chr1	6643942	6649375	AT1G19230		Chr1	6765653	6768290	AT1G19540		Chr4	14530812	14534314	AT4G29658			Chr1	19423695	19425326	AT1G52160			Chr3	18518743	18520513	AT3G08090			Chr4	13542977	13544287	AT4G26970
	Chr1	8371020	8371106	AT1G23650		Chr1	8938387	8940613	AT1G25450		Chr1	6650476	6653195	AT1G19250		Chr1	6772084	6773131	AT1G19565		Chr1	1701296	1702688	AT1G05675			Chr1	19423695	19425326	AT1G52180			Chr4	17403949	17404421	AT4G36925			Chr5	19278805	19280994	AT5G47520
	Chr1	8373239	8375897	AT1G23670		Chr1	8941002	8941202	AT1G05967		Chr1	6679281	6680252	AT1G19320		Chr1	6781483	6782216	AT1G19610		Chr5	22158200	22159409	AT5G54550			Chr4	14866334	14867828	AT4G30400			Chr5	178803	182255	AT5G01440			Chr2	6366011	6367417	AT2G14835
	Chr1	8376687	8377156	AT1G23680		Chr1	8959087	8961183	AT1G25510		Chr1	6700455	6700686	AT1G08935		Chr1	6783803	6788175	AT1G19630		Chr3	15218085	15222025	AT3G43260			Chr4	670036	672688	AT4G01540			Chr1	8786301	8789627	AT1G24909			Chr1	11834799	11837643	AT1G32720
	Chr1	8377262	8378769	AT1G23690		Chr1	8964544	8967562	AT1G25530		Chr1	6700756	6703368	AT1G19390		Chr1	6784020	6785075	AT1G19620		Chr5	24701085	24702690	AT5G61430			Chr5	23400174	23403098	AT5G57770			Chr5	8439399	8440458	AT5G03815			Chr5	24978983	24979610	AT5G62180
	Chr1	8354806	8356507	AT1G23570		Chr1	8964544	8967562	AT1G25530		Chr1	6714492	6716439	AT1G19410		Chr1	6783803	6788175	AT1G19630		Chr2	676610	679252	AT2G02520			Chr1	3577331	3579240	AT1G10750			Chr1	7868018	7872247	AT1G22275			Chr2	6274458	6274957	AT2G14670
	Chr1	8371609	8372845	AT1G23660		Chr1	9016252	9017450	AT1G25988		Chr1	6718602	6719196	AT1G05503		Chr1	6788885	6791919	AT1G19640		Chr1	1461306	1462186	AT1G05085			Chr4	2543524	2547610	AT4G04980			Chr5	14268986	14273015	AT5G36228			Chr5	126386	127751	AT5G01310
	Chr1	8378972	8382290	AT1G23700		Chr1	9063306	9065320	AT1G26200		Chr1	6738484	6739734	AT1G19460		Chr1	6803486	6805092	AT1G19670		Chr1	1461306	1462186	AT1G04327			Chr1	1217937	1220596	AT1G04490			Chr5	19612088	19615846	AT5G48390			Chr1	6524156	6525866	AT1G18890
	Chr1	8387406	8387640	AT1G05827		Chr1	9077874	9079646	AT1G26240		Chr1	6740500	6740591	AT1G19464		Chr1	6833669	6836633	AT1G19780		Chr5	25297125	25300008	AT5G63063			Chr1	5974885	5976000	AT1G05313			Chr3	3188537	3190979	AT3G10310			Chr1	6524156	6525866	AT1G05453
	Chr1	8388297	8391623	AT1G23720		Chr1	9077874	9079646	AT1G26240		Chr1	6741296	6742534	AT1G19470		Chr1	6838120	6840313	AT1G19790		Chr4	13909751	13910787	AT4G27950			Chr4	625787	627541	AT4G01480			Chr3	338230	341636	AT3G02020			Chr1	10846744	10849162	AT1G30610
	Chr1	8395466	8398387	AT1G23730		Chr1	9083838	9085464	AT1G26250		Chr1	6754665	6755684	AT1G19500		Chr1	6852116	6852945	AT1G19830		Chr4	14952578	14956017	AT4G30640			Chr5	1577160	1578674	AT5G05330			Chr3	338230	341636	AT3G02010			Chr4	2494047	2497502	AT4G04910
	Chr1	8388297	8391623	AT1G23720		Chr1	9083856	9085651	AT1G26255		Chr1	6756237	6757420	AT1G19510		Chr1	6904963	6906028	AT1G19890		Chr4	14952578	14956017	AT4G30650			Chr4	18291161	18293536	AT4G39330			Chr4	16320229	16322427	AT4G03365			Chr5	23196048	23199023	AT5G57250
	Chr1	8401808	8404301	AT1G23760		Chr1	9099994	9103644	AT1G26310		Chr1	6765653	6768290	AT1G19540		Chr1	6906899	6908805	AT1G19900		Chr4	16451906	16453125	AT4G34410			Chr2	6274577	6274815	AT2G14670			Chr5	14932886	14933940	AT5G37600			Chr1	23229549	23230704	AT1G62730
	Chr1	8405214	8406266	AT1G23770		Chr1	9105038	9107231	AT1G26320		Chr1	6772084	6773131	AT1G19565		Chr1	6917020	6918138	AT1G19930		Chr4	16451906	16453125	AT4G08985			Chr5	25088825	25090740	AT5G62480			Chr4	13200497	13204485	AT4G26010			Chr5	20195469	20196124	AT5G49710
	Chr1	8417495	8418566	AT1G23810		Chr1	9116010	9116781	AT1G26350		Chr1	6781483	6782216	AT1G19610		Chr1	6918159	6921979	AT1G19940		Chr1	23890952	23893102	AT1G64380			Chr5	25088825	25090740	AT5G62490			Chr4	13200497	13204485	AT4G26020			Chr4	15118405	15120493	AT4G31070
	Chr1	8451068	8451289	AT1G23910		Chr1	9117932	9118611	AT1G26355		Chr1	6783803	6788175	AT1G19630		Chr1	6918159	6921979	AT1G19940		Chr2	17159851	17161191	AT2G41170			Chr3	7391294	7393556	AT3G21090			Chr4	1960457	1962434	AT4G04077			Chr3	21258710	21259105	AT3G57440
	Chr1	8461757	8469573	AT1G23935		Chr1	9118822	9121227	AT1G26360		Chr1	6784020	6785075	AT1G19620		Chr1	6931012	6932826	AT1G19970		Chr5	26527959	26531653	AT5G66440			Chr3	5800153	5802365	AT3G17010			Chr1	24638048	24640851	AT1G66170			Chr1	3278137	3282400	AT1G10050
	Chr1	8480422	8481599	AT1G23965		Chr1	9126737	9128568	AT1G26380		Chr1	6783803	6788175	AT1G19630		Chr1	6930261	6930985	AT1G19968		Chr5	4370876	4372988	AT5G13580			Chr5	7559404	7560072	AT5G22740			Chr3	22172423	22174266	AT3G09335			Chr5	18796824	18799974	AT5G46340
	Chr1	8495908	8496566	AT1G24000		Chr1	9130013	9131779	AT1G26390		Chr1	6788885	6791919	AT1G19640		Chr1	6933015	6935053	AT1G19980		Chr5	2358668	2362025	AT5G07460			Chr5	22108099	22109478	AT5G54450			Chr2	14596615	14600628	AT2G34655			Chr2	15605204	15608460	AT2G37150
	Chr1	8498803	8499517	AT1G24010		Chr1	9133291	9134874	AT1G26400		Chr1	6803486	6805092	AT1G19670		Chr1	6935218	6936928	AT1G19990		Chr4	10889807	10893156	AT4G20160			Chr1	21079615	21082158	AT1G56300			Chr1	23509961	23510786	AT1G63410			Chr5	18666895	18670918	AT5G46030
	Chr1	8500119	8502065	AT1G24020		Chr1	9138604	9140439	AT1G26410		Chr1	6826830	6830330	AT1G19750		Chr1	6936898	6937666	AT1G20000		Chr3	885159	887087	AT3G03650			Chr3	19325373	19328434	AT3G52115			Chr2	10814035	10816263	AT2G25410			Chr4	5581590	5586473	AT4G08760
	Chr1	8509736	8510056	AT1G24060		Chr1	9141519	9143336	AT1G26420		Chr1	6833669	6836633	AT1G19780		Chr1	6937719	6940832	AT1G20010		Chr5	15906531	15909510	AT5G39750			Chr1	16716137	16718522	AT1G44020			Chr2	10814035	10816263	AT2G25409			Chr5	17200597	17203704	AT5G42905
	Chr1	8510401	8510967	AT1G24062		Chr1	9148636	9150250	AT1G26450		Chr1	6838120	6840313	AT1G19790		Chr1	6957968	6959124	AT1G05523		Chr2	14553872	14558516	AT2G34555			Chr5	26021181	26022196	AT5G65140			Chr1	29282327	29284500	AT1G77860			Chr3	16934117	16939775	AT3G46120
	Chr1	8515506	8515971	AT1G24068		Chr1	9159851	9161044	AT1G26510		Chr1	6852116	6852945	AT1G19830		Chr1	6958010	6959148	AT1G20070		Chr2	9833868	9837095	AT2G23093			Chr1	26927104	26930275	AT1G71450			Chr5	1684492	1687630	AT5G05640			Chr1	8800836	8804304	AT1G25025
	Chr1	8516166	8519984	AT1G24070		Chr1	9161810	9162910	AT1G26515		Chr1	6886669	6891404	AT1G19850		Chr1	6962030	6965443	AT1G20080		Chr2	9833868	9837095	AT2G23096			Chr1	26927104	26930275	AT1G71460			Chr5	2285064	2290198	AT5G07280			Chr2	7614851	7618780	AT2G17510
	Chr1	8527714	8529018	AT1G24110		Chr1	9158380	9159897	AT1G26500		Chr1	6904963	6906028	AT1G19890		Chr1	6975339	6977267	AT1G20120		Chr4	6669283	6672266	AT4G05835			Chr2	1010742	1012930	AT2G03330			Chr2	6360991	6362252	AT2G14820			Chr2	7614851	7618780	AT2G17520
	Chr1	8534146	8535660	AT1G24130		Chr1	9191503	9192590	AT1G26600		Chr1	6906899	6908805	AT1G19900		Chr1	6981264	6983627	AT1G20132		Chr4	14136902	14138098	AT4G28620			Chr2	14106041	14108612	AT2G33280			Chr2	14407890	14412382	AT2G34100			Chr5	3260527	3263699	AT5G10370
	Chr1	8535999	8537780	AT1G24140		Chr1	9227341	9227548	AT1G06007		Chr1	6917020	6918138	AT1G19930		Chr1	6984042	6985703	AT1G20135		Chr2	10660871	10662957	AT2G25060			Chr1	17004202	17007323	AT1G44980			Chr1	1294941	1298766	AT1G04650			Chr1	29697413	29699326	AT1G78960
	Chr1	8540838	8542053	AT1G24145		Chr1	9227378	9232437	AT1G26700		Chr1	6918159	6921979	AT1G19940		Chr1	6986312	6987863	AT1G20140		Chr3	10150451	10152256	AT3G27425			Chr2	6034632	6036615	AT2G14247			Chr4	6694139	6695833	AT4G10895			Chr1	12588781	12591895	AT1G34430
	Chr1	8542212	8543545	AT1G24147		Chr1	9232328	9233206	AT1G26710		Chr1	6918159	6921979	AT1G19940		Chr1	6987272	6990362	AT1G20150		Chr5	18206231	18208765	AT5G45095			Chr5	25784438	25787307	AT5G64510			Chr3	2044906	2046524	AT3G06560			Chr5	3102806	3105908	AT5G09950
	Chr1	8544248	8545590	AT1G24148		Chr1	9234099	9234939	AT1G26720		Chr1	6927736	6928656	AT1G19960		Chr1	6977753	6980241	AT1G20130		Chr1	8132419	8134365	AT1G22980			Chr5	25784438	25787307	AT5G09195			Chr4	6893196	6895371	AT4G11330			Chr5	1955922	1958980	AT5G06400
	Chr1	8578658	8582767	AT1G24220		Chr1	9253599	9254167	AT1G26762		Chr1	6931012	6932826	AT1G19970		Chr1	6990642	6993989	AT1G20160		Chr3	20679203	20681432	AT3G55720			Chr5	13602563	13604974	AT5G35405			Chr4	6893196	6895371	AT4G11340			Chr5	18413087	18415004	AT5G45440
	Chr1	8592078	8592989	AT1G24256		Chr1	9264404	9264580	AT1G26773		Chr1	6930261	6930985	AT1G19968		Chr1	6996176	6997943	AT1G20180		Chr5	4518023	4519433	AT5G14000			Chr3	1555658	1560474	AT3G05410			Chr2	14006249	14010562	AT2G33000			Chr4	16863250	16871126	AT4G35520
	Chr1	8593536	8596123	AT1G24260		Chr1	9270952	9272713	AT1G26780		Chr1	6956374	6958075	AT1G20065		Chr1	6998335	6999839	AT1G20190		Chr4	7987608	7990242	AT4G13760			Chr3	2914899	2916630	AT3G09480			Chr4	8030308	8030811	AT4G13885			Chr4	117742	121957	AT4G00270
	Chr1	8649780	8650020	AT1G05887		Chr1	9273684	9275193	AT1G26790		Chr1	6957968	6959124	AT1G05523		Chr1	7012113	7015216	AT1G20240		Chr4	7962438	7966029	AT4G13710			Chr3	2914899	2916630	AT3G09490			Chr2	5053964	5055845	AT2G12465			Chr3	7040392	7042910	AT3G20170
	Chr1	8649816	8650056	AT1G05893		Chr1	9276381	9276954	AT1G26795		Chr1	6958010	6959148	AT1G20070		Chr1	7025548	7029698	AT1G20290		Chr3	10520522	10522435	AT3G28210			Chr1	7512079	7513356	AT1G21460			Chr1	21784788	21785269	AT1G58808			Chr1	5356411	5358158	AT1G05167
	Chr1	8651407	8653915	AT1G24400		Chr1	9278953	9279482	AT1G26796		Chr1	6962030	6965443	AT1G20080		Chr1	7032070	7033329	AT1G20310		Chr3	2757503	2758077	AT3G09032			Chr3	20117774	20118692	AT3G54320			Chr5	10369940	10374282	AT5G28450			Chr1	5098252	5102161	AT1G14800
	Chr1	8650622	8650899	AT1G05897		Chr1	9280955	9281560	AT1G26797		Chr1	6975339	6977267	AT1G20120		Chr1	7033657	7034881	AT1G20320		Chr3	129179	130650	AT3G01345			Chr1	1511927	1514899	AT1G05220			Chr2	659443	661010	AT2G02480			Chr1	18605376	18608518	AT1G50240
	Chr1	8654945	8655662	AT1G24405		Chr1	9281791	9282341	AT1G26798		Chr1	6981264	6983627	AT1G20132		Chr1	7043628	7044592	AT1G20350		Chr2	17499355	17501188	AT2G41920			Chr1	1511927	1514899	AT1G04353			Chr5	23062669	23064074	AT5G57000			Chr3	16160623	16163228	AT3G44580
	Chr1	8659678	8660351	AT1G05903		Chr1	9283873	9284438	AT1G26799		Chr1	6984042	6985703	AT1G20135		Chr1	7046123	7046378	AT1G05537		Chr5	24075884	24076519	AT5G59760			Chr1	1511927	1514899	AT1G05230			Chr5	26116336	26118386	AT5G09355			Chr2	5053971	5055816	AT2G12465
	Chr1	8673914	8676408	AT1G24470		Chr1	9290870	9291301	AT1G26815		Chr1	6986312	6987863	AT1G20140		Chr1	7046504	7047744	AT1G20360		Chr1	23734765	23738585	AT1G63950			Chr3	11361841	11365342	AT3G29570			Chr2	9383652	9385916	AT2G22070			Chr1	734734	737982	AT1G03080
	Chr1	8676282	8676343	AT1G24475		Chr1	9291723	9292147	AT1G06027		Chr1	6987272	6990362	AT1G20150		Chr1	7049116	7049939	AT1G05543		Chr1	23734765	23738585	AT1G63960			Chr1	22333961	22337021	AT1G60630			Chr2	14248483	14251725	AT2G33680			Chr5	55108	57176	AT5G01160
	Chr1	8676360	8677228	AT1G24480		Chr1	9292446	9293862	AT1G26820		Chr1	6990642	6993989	AT1G20160		Chr1	7058194	7058310	AT1G20375		Chr5	15504913	15508185	AT5G00545			Chr5	15596532	15599692	AT5G38970			Chr1	4478518	4480621	AT1G13140			Chr3	10665428	10667881	AT3G28450
	Chr1	8678858	8681894	AT1G24485		Chr1	9312936	9315122	AT1G26870		Chr1	6977753	6980241	AT1G20130		Chr1	7094833	7097147	AT1G20480		Chr1	23781924	23783713	AT1G64070			Chr5	23811476	23814602	AT5G58980			Chr1	4478518	4480621	AT1G13143			Chr1	2911368	2913970	AT1G09040
	Chr1	8688563	8689268	AT1G24520		Chr1	9351160	9352833	AT1G26945		Chr1	6990642	6993989	AT1G20160		Chr1	7100502	7102915	AT1G20500		Chr4	13737011	13738951	AT4G27480			Chr4	12384169	12387205	AT4G23780			Chr3	9902826	9903684	AT3G26870			Chr5	750161	753097	AT5G03160
	Chr1	8692630	8694705	AT1G24530		Chr1	9359325	9361833	AT1G26970		Chr1	6996176	6997943	AT1G20180		Chr1	7106128	7108108	AT1G20515		Chr5	5421694	5423880	AT5G16570			Chr5	5008023	5008553	AT5G15420			Chr3	8177366	8179836	AT3G23020			Chr3	8177388	8179861	AT3G23020
	Chr1	8701112	8702477	AT1G24545		Chr1	9363196	9363288	AT1G26973		Chr1	6998335	6999839	AT1G20190		Chr1	7106922	7107617	AT1G20520		Chr4	6559819	6564052	AT4G10613			Chr1	9643375	9647375	AT1G27720			Chr5	3749758	3751313	AT5G11660			Chr1	20421736	20423936	AT1G54720
	Chr1	8699650	8701458	AT1G24540		Chr1	9378404	9380790	AT1G27020		Chr1	7012113	7015216	AT1G20240		Chr1	7108203	7110634	AT1G20530		Chr4	10024721	10027192	AT4G18050			Chr5	1602277	1603852	AT5G05410			Chr5	21357264	21358831	AT5G52655			Chr5	18257347	18260290	AT5G45140
	Chr1	8712478	8713225	AT1G24577		Chr1	9381527	9384060	AT1G27030		Chr1	7025548	7029698	AT1G20290		Chr1	7169309	7170856	AT1G20680		Chr4	10024721	10027192	AT4G18060			Chr2	10120413	10122069	AT2G23770			Chr2	8622149	8623487	AT2G19960			Chr5	19189389	19194647	AT5G47260
	Chr1	8714365	8715378	AT1G24590		Chr1	9386693	9390042	AT1G27040		Chr1	7032070	7033329	AT1G20310		Chr1	7172515	7172835	AT1G20683		Chr3	17920853	17923873	AT3G48390			Chr5	6520218	6523923	AT5G19360			Chr2	8622149	8623487	AT2G07255			Chr5	19189389	19194647	AT5G47280
	Chr1	8723627	8724711	AT1G24620		Chr1	9432418	9433190	AT1G27160		Chr1	7033657	7034881	AT1G20320		Chr1	7173009	7173340	AT1G20687		Chr3	8936549	8939279	AT3G24514			Chr5	6520218	6523923	AT5G19350			Chr1	21847926	21849351	AT1G59453			Chr1	27513519	27516662	AT1G73170
	Chr1	8734570	8737315	AT1G24650		Chr1	9463806	9465444	AT1G27220		Chr1	7043628	7044592	AT1G20350		Chr1	7182558	7184056	AT1G20700		Chr3	8936549	8939279	AT3G24518			Chr4	8709961	8711509	AT4G15250			Chr3	19128027	19130576	AT3G51570			Chr1	18547530	18548547	AT1G50050
	Chr1	8740205	8740469	AT1G24660		Chr1	9466237	9467076	AT1G27240		Chr1	7046123	7046378	AT1G05537		Chr1	7194172	7195609	AT1G20730		Chr2	18782489	18784734	AT2G45580			Chr4	13200544	13204481	AT4G26010			Chr5	13201178	13203917	AT5G34885			Chr1	17836778	17839461	AT1G48280
	Chr1	8757864	8759645	AT1G24735		Chr1	9537736	9539027	AT1G27461		Chr1	7046504	7047744	AT1G20360		Chr1	7197491	7198681	AT1G20735		Chr3	1163693	1167015	AT3G04380			Chr4	13200544	13204481	AT4G26020			Chr5	9622557	9625096	AT5G27300			Chr1	17836778	17839461	AT1G07483
	Chr1	8840203	8842445	AT1G25230		Chr1	9544410	9546285	AT1G27480		Chr1	7049116	7049939	AT1G05543		Chr1	7200332	7201737	AT1G20740		Chr1	20979812	20982767	AT1G56100			Chr5	15937133	15940209	AT5G39810			Chr1	18081931	18084441	AT1G48880			Chr3	17175365	17177581	AT3G46617
	Chr1	8843774	8844366	AT1G05937		Chr1	9546373	9547073	AT1G27490		Chr1	7050831	7051140	AT1G05547		Chr1	7203302	7209013	AT1G20750		Chr5	19839274	19842568	AT5G48940			Chr5	15937133	15940209	AT5G39820			Chr2	10588667	10589091	AT2G24870			Chr3	15880511	15884903	AT3G44130
	Chr1	8845142	8846726	AT1G25240		Chr1	9568813	9569330	AT1G27550		Chr1	7058194	7058310	AT1G20375		Chr1	7203302	7209013	AT1G20750		Chr3	22715757	22718303	AT3G61390			Chr5	5421865	5423662	AT5G16570			Chr5	15230957	15235543	AT5G38190			Chr3	7182184	7187142	AT3G20560
	Chr1	8849006	8849506	AT1G05943		Chr1	9570397	9570962	AT1G27555		Chr1	7100502	7102915	AT1G20500		Chr1	7220880	7222432	AT1G20790		Chr3	1546625	1548818	AT3G05390			Chr5	1180589	1184595	AT5G04270			Chr1	20422722	20423965	AT1G54720			Chr5	15820276	15822403	AT5G39510
	Chr1	8849034	8851790	AT1G25250		Chr1	9575538	9582376	AT1G27570		Chr1	7106128	7108108	AT1G20515		Chr1	7223055	7223257	AT1G05583		Chr2	9913127	9915952	AT2G23300			Chr3	19023399	19024370	AT3G51230			Chr1	943980	946660	AT1G03770			Chr5	22510782	22514342	AT5G55565
	Chr1	8852648	8853171	AT1G05947		Chr1	9589675	9589914	AT1G06103		Chr1	7106922	7107617	AT1G20520		Chr1	7223476	7223713	AT1G05587		Chr3	22613703	22616231	AT3G61113			Chr1	19542063	19546309	AT1G52450			Chr2	11887463	11888016	AT2G27920			Chr2	987387	990660	AT2G03260
	Chr1	8852719	8853071	AT1G05953		Chr1	9589807	9591075	AT1G27580		Chr1	7108203	7110634	AT1G20530		Chr1	7223760	7224256	AT1G05593		Chr2	8378657	8383452	AT2G19360			Chr1	192894	193912	AT1G01530			Chr4	10661570	10665035	AT4G19560			Chr3	5692418	5693657	AT3G16720
	Chr1	8857726	8859909	AT1G25270		Chr1	9589807	9591075	AT1G27580		Chr1	7169309	7170856	AT1G20680		Chr1	7225434	7225775	AT1G05603		Chr2	8378657	8383452	AT2G19365			Chr1	4966340	4967660	AT1G14518			Chr3	1687744	1691543	AT3G05720			Chr1	9883789	9884227	AT1G28270
	Chr1	8861734	8862797	AT1G25277		Chr1	9606968	9607996	AT1G27610		Chr1	7172515	7172835	AT1G20683		Chr1	7226310	7227566	AT1G20795		Chr1	17873690	17874962	AT1G48370			Chr3	4877949	4880754	AT3G14530			Chr1	28855931	28857385	AT1G76870			Chr5	10281445	10284265	AT5G28290
	Chr1	8871568	8872386	AT1G25300		Chr1	9608153	9610566	AT1G27620		Chr1	7173009	7173340	AT1G20687		Chr1	7228718	7230240	AT1G20800		Chr1	18987091	18988912	AT1G51210			Chr2	14451135	14453395	AT2G34220			Chr1	7665414	7666004	AT1G21835			Chr3	9953718	9956722	AT3G27000
	Chr1	8874124	8874834	AT1G25310		Chr1	9621398	9626067	AT1G27660		Chr1	7194172	7195609	AT1G20730		Chr1	7231049	7231600	AT1G20803		Chr3	18651981	18655165	AT3G50320			Chr4	11975978	11976876	AT4G22790			Chr1	24272428	24277260	AT1G65350			Chr1	17150181	17152712	AT1G45231
	Chr1	8876312	8876558	AT1G05957		Chr1	9627533	9628749	AT1G27670		Chr1	7197491	7198681	AT1G20735		Chr1	7225309	7225588	AT1G05597		Chr4	13236374	13238865	AT4G26120			Chr5	16801755	16806502	AT5G42010			Chr5	15656868	15659252	AT5G39110			Chr4	10869212	10871662	AT4G20090
	Chr1	8880267	8882100	AT1G25330		Chr1	9654475	9656089	AT1G27740		Chr1	7200332	7201737	AT1G20740		Chr1	7252111	7253747	AT1G20850		Chr1	17812251	17815151	AT1G48260			Chr5	1410307	1414519	AT5G04860			Chr4	17821323	17824569	AT4G37900			Chr5	13361158	13362744	AT5G35100
	Chr1	8877790	8880388	AT1G25320		Chr1	9704558	9706238	AT1G27860		Chr1	7203302	7209013	AT1G20750		Chr1	7253998	7258952	AT1G20860		Chr1	13064601	13066763	AT1G35500			Chr2	16765965	16768635	AT2G40130			Chr3	4572179	4574349	AT3G13880			Chr1	18550473	18553606	AT1G50060
	Chr1	8885020	8886777	AT1G25340		Chr1	9706657	9707298	AT1G27870		Chr1	7220880	7222432	AT1G20790		Chr1	7259023	7261524	AT1G20870		Chr4	12002123	12006106	AT4G22880			Chr2	11324985	11328934	AT2G26620			Chr1	23031511	23035338	AT1G62310			Chr1	1596196	1598664	AT1G05440
	Chr1	8911096	8912822	AT1G25400		Chr1	9714136	9715176	AT1G27890		Chr1	7223055	7223257	AT1G05583		Chr1	7253998	7258952	AT1G20860		Chr3	1012333	1013726	AT3G03930			Chr3	4165385	4169214	AT3G13020			Chr1	19480850	19483936	AT1G52315			Chr3	20053295	20056545	AT3G54160
	Chr1	8914191	8915219	AT1G25410		Chr1	9740508	9742159	AT1G27950		Chr1	7223476	7223713	AT1G05587		Chr1	7262009	7265555	AT1G20880		Chr5	18379375	18383590	AT5G45350			Chr5	22510782	22514397	AT5G55565			Chr2	15680251	15681832	AT2G37370			Chr4	16325228	16326792	AT4G34071
	Chr1	8918789	8919892	AT1G25422		Chr1	9752742	9753952	AT1G27990		Chr1	7223760	7224256	AT1G05593		Chr1	7272526	7274072	AT1G20900		Chr2	10540540	10544366	AT2G24755			Chr2	15944706	15945731	AT2G38090			Chr3	19737376	19740470	AT3G53240			Chr5	15400337	15404052	AT5G38460
	Chr1	8922416	8923879	AT1G25425		Chr1	9756674	9757963	AT1G28000		Chr1	7225434	7225775	AT1G05603		Chr1	7274575	7275117	AT1G08945		Chr1	28597302	28598198	AT1G76220			Chr3	10700529	10703852	AT3G28550			Chr3	16845582	16848660	AT3G45840			Chr1	28514903	28516294	AT1G75945
	Chr1	8938387	8940613	AT1G25450		Chr1	9756927	9757891	AT1G28005		Chr1	7226310	7227566	AT1G20795		Chr1	7289973	7292580	AT1G20925		Chr5	3532096	3534032	AT5G11100			Chr3	11104225	11105218	AT3G00560			Chr3	10372906	10375444	AT3G27940			Chr2	13159028	13160879	AT2G30920
	Chr1	8941002	8941202	AT1G05967		Chr1	9768889	9771157	AT1G28020		Chr1	7228718	7230240	AT1G20800		Chr1	7295274	7296518	AT1G20940		Chr2	16444232	16445139	AT2G39370			Chr1	4601371	4604119	AT1G13410			Chr3	19086676	19090467	AT3G51440			Chr1	4731984	4733746	AT1G13800
	Chr1	8959087	8961183	AT1G25510		Chr1	9771793	9773389	AT1G28030		Chr1	7231049	7231600	AT1G20803		Chr1	7330256	7332100	AT1G20990		Chr1	6273649	6277928	AT1G18250			Chr5	7504406	7508531	AT5G22590			Chr3	19086676	19090467	AT3G51430			Chr5	19943331	19947503	AT5G49190
	Chr1	8964544	8967562	AT1G25530		Chr1	9773580	9775481	AT1G28040		Chr1	7225309	7225588	AT1G05597		Chr1	7384560	7386580	AT1G21090		Chr5	609562	612361	AT5G02700			Chr4	683158	687218	AT4G01580			Chr1	23743582	23745358	AT1G63990			Chr1	6587789	6593382	AT1G19090
	Chr1	9016252	9017450	AT1G25988		Chr1	9789691	9791546	AT1G28080		Chr1	7252111	7253747	AT1G20850		Chr1	7386762	7388512	AT1G21100		Chr4	1936615	1938846	AT4G04030			Chr5	14138971	14140636	AT5G36000			Chr3	9024950	9029160	AT3G24715			Chr1	2936883	2939284	AT1G09100
	Chr1	9063306	9065320	AT1G26200		Chr1	9794544	9794763	AT1G06113		Chr1	7253998	7258952	AT1G20860		Chr1	7389981	7391603	AT1G21110		Chr3	16070832	16073237	AT3G06835			Chr5	9544835	9547933	AT5G27130			Chr1	11425007	11426759	AT1G31840			Chr5	23533694	23537102	AT5G58160
	Chr1	9077874	9079646	AT1G26240		Chr1	9825169	9828118	AT1G28130		Chr1	7259023	7261524	AT1G20870		Chr1	7395179	7396823	AT1G21120		Chr5	25499352	25502778	AT5G63710			Chr2	19109686	19110322	AT2G46535			Chr5	15580715	15582922	AT5G38920			Chr1	1125676	1126936	AT1G04230
	Chr1	9077874	9079646	AT1G26240		Chr1	9839316	9840124	AT1G28160		Chr1	7253998	7258952	AT1G20860		Chr1	7398814	7400736	AT1G21130		Chr4	11756677	11758974	AT4G07055			Chr5	5643948	5646772	AT5G17165			Chr2	16518859	16521474	AT2G39620			Chr5	21165399	21169869	AT5G52090
	Chr1	9083838	9085464	AT1G26250		Chr1	9841269	9842435	AT1G28170		Chr1	7262009	7265555	AT1G20880		Chr1	7404328	7405426	AT1G21140		Chr3	4803132	4803786	AT3G14380			Chr5	5643948	5646772	AT5G17167			Chr3	22476654	22480914	AT3G60840			Chr2	14006261	14010568	AT2G33000
	Chr1	9083856	9085651	AT1G26255		Chr1	9843023	9844561	AT1G28180		Chr1	7272526	7274072	AT1G20900		Chr1	7406218	7407870	AT1G21150		Chr5	23882005	23882996	AT5G59170			Chr3	22254879	22255821	AT3G60220			Chr1	9883813	9884216	AT1G28270			Chr5	20649189	20653961	AT5G50780
	Chr1	9083838	9085464	AT1G26250		Chr1	9862041	9864779	AT1G28230		Chr1	7274575	7275117	AT1G08945		Chr1	7423704	7427041	AT1G21210		Chr4	18288756	18289831	AT4G39320			Chr5	16445600	16446527	AT5G41090			Chr5	24270148	24274566	AT5G60320			Chr5	273003	277593	AT5G01730
	Chr1	9083856	9085651	AT1G26255		Chr1	9882237	9882450	AT1G06133		Chr1	7289973	7292580	AT1G20925		Chr1	7429895	7432477	AT1G21230		Chr5	21817399	21818576	AT5G53750			Chr5	18877007	18878361	AT5G46540			Chr5	24270148	24274566	AT5G60335			Chr5	273003	277593	AT5G01732
	Chr1	9099994	9103644	AT1G26310		Chr1	9882951	9884189	AT1G28270		Chr1	7295274	7296518	AT1G20940		Chr1	7433801	7434105	AT1G05643		Chr1	22448684	22451923	AT1G60970			Chr1	5798884	5800726	AT1G16960			Chr3	10747661	10749828	AT3G28680			Chr3	18321816	18324387	AT3G49400
	Chr1	9105038	9107231	AT1G26320		Chr1	9889101	9891015	AT1G28290		Chr1	7330256	7332100	AT1G20990		Chr1	7434235	7436830	AT1G21240		Chr4	8949858	8952088	AT4G15720			Chr3	3352321	3355864	AT3G10710			Chr2	16466025	16467659	AT2G39435			Chr3	17672324	17673701	AT3G47890
	Chr1	9116010	9116781	AT1G26350		Chr1	9896867	9899876	AT1G28300		Chr1	7384560	7386580	AT1G21090		Chr1	7436842	7437342	AT1G21245		Chr4	8949858	8952088	AT4G15730			Chr3	3352321	3355864	AT3G10720			Chr2	8366406	8368813	AT2G19290			Chr4	11099266	11103291	AT4G20700
	Chr1	9117932	9118611	AT1G26355		Chr1	9904710	9905516	AT1G28305		Chr1	7386762	7388512	AT1G21100		Chr1	7439171	7442113	AT1G21250		Chr3	1426181	1427864	AT3G05110			Chr5	16898644	16901939	AT5G42260			Chr4	10203699	10208605	AT4G18490			Chr4	11099266	11103291	AT4G20703
	Chr1	9118822	9121227	AT1G26360		Chr1	9906882	9907725	AT1G28306		Chr1	7389981	7391603	AT1G21110		Chr1	7444749	7448483	AT1G21270		Chr3	1426181	1427864	AT3G05100			Chr5	24248899	24251199	AT5G60220			Chr2	18660897	18661244	AT2G45245			Chr4	11099266	11103291	AT4G20707
	Chr1	9118822	9121227	AT1G26360		Chr1	9912203	9913837	AT1G28310		Chr1	7395179	7396823	AT1G21120		Chr1	7447490	7448483	AT1G21280		Chr5	22388868	22392009	AT5G55180			Chr5	24248899	24251199	AT5G60230			Chr2	18660897	18661244	AT2G45243			Chr5	6921849	6926313	AT5G20480
	Chr1	9126737	9128568	AT1G26380		Chr1	9931934	9933451	AT1G28327		Chr1	7398814	7400736	AT1G21130		Chr1	7453735	7454256	AT1G21313		Chr5	22720685	22722115	AT5G56120			Chr5	20792199	20795227	AT5G51160			Chr2	1043761	1044845	AT2G03460			Chr4	5300753	5304051	AT4G08370
	Chr1	9130013	9131779	AT1G26390		Chr1	9951762	9953105	AT1G28360		Chr1	7404328	7405426	AT1G21140		Chr1	7453245	7455009	AT1G21310		Chr1	4773571	4775235	AT1G13950			Chr5	20792199	20795227	AT5G51170			Chr2	1043761	1044845	AT2G04525			Chr4	17524535	17524910	AT4G37240
	Chr1	9133291	9134874	AT1G26400		Chr1	9961055	9961745	AT1G28375		Chr1	7406218	7407870	AT1G21150		Chr1	7453245	7455009	AT1G21310		Chr5	18537464	18540627	AT5G45700			Chr4	388018	391306	AT4G00910			Chr5	26864504	26867284	AT5G67340			Chr2	11324658	11329049	AT2G26620
	Chr1	9138604	9140439	AT1G26410		Chr1	9966186	9968495	AT1G28390		Chr1	7423704	7427041	AT1G21210		Chr1	7460104	7460501	AT1G05647		Chr1	11259085	11261928	AT1G31450			Chr4	388018	391306	AT4G00905			Chr2	16187974	16192150	AT2G38720			Chr3	3967160	3967595	AT3G12510
	Chr1	9141519	9143336	AT1G26420		Chr1	9967837	9968056	AT1G06153		Chr1	7429895	7432477	AT1G21230		Chr1	7462327	7466164	AT1G21320		Chr4	9330339	9331393	AT4G16563			Chr2	16003331	16006269	AT2G38195			Chr5	19055390	19057416	AT5G46930			Chr3	3967160	3967595	AT3G02535
	Chr1	9148636	9150250	AT1G26450		Chr1	9972185	9973942	AT1G28400		Chr1	7429895	7432477	AT1G21230		Chr1	7466694	7467359	AT1G21323		Chr5	10034366	10037100	AT5G28040			Chr1	10633259	10635493	AT1G30220			Chr5	19055390	19057416	AT5G46920			Chr5	19604582	19606836	AT5G48380
	Chr1	9159851	9161044	AT1G26510		Chr1	9992661	9994656	AT1G28430		Chr1	7433801	7434105	AT1G05643		Chr1	7473011	7473358	AT1G05657		Chr5	21055867	21057064	AT5G51810			Chr1	19531842	19536003	AT1G52430			Chr2	12988323	12992655	AT2G30480			Chr5	4006729	4008721	AT5G12370
	Chr1	9161810	9162910	AT1G26515		Chr1	10003880	10004581	AT1G28450		Chr1	7434235	7436830	AT1G21240		Chr1	7481184	7483513	AT1G21360		Chr3	6696329	6700001	AT3G19320			Chr3	5959480	5962153	AT3G17420			Chr4	6184066	6184596	AT4G09820			Chr2	11886866	11889045	AT2G27920
	Chr1	9158380	9159897	AT1G26500		Chr1	10006230	10006778	AT1G28460		Chr1	7436842	7437342	AT1G21245		Chr1	7500845	7502186	AT1G21430		Chr3	6696329	6700001	AT3G19330			Chr5	16428767	16429596	AT5G41030			Chr2	1886449	1890396	AT2G00420			Chr5	20418969	20423165	AT5G50170
	Chr1	9191503	9192590	AT1G26600		Chr1	10012637	10013263	AT1G06163		Chr1	7439171	7442113	AT1G21250		Chr1	7511750	7513481	AT1G21460		Chr1	17004101	17007383	AT1G44980			Chr1	2156908	2158282	AT1G07025			Chr2	3614977	3628019	AT2G07981			Chr2	665780	668763	AT2G02490
	Chr1	9227341	9227548	AT1G06007		Chr1	10010124	10012258	AT1G28470		Chr1	7444749	7448483	AT1G21270		Chr1	7516009	7517637	AT1G21470		Chr4	11318316	11321794	AT4G21220			Chr4	7592127	7593815	AT4G05995			Chr2	3614977	3628019	AT2G08986			Chr2	665780	668763	AT2G02493
	Chr1	9227378	9232437	AT1G26700		Chr1	10013434	10014256	AT1G28480		Chr1	7447490	7448483	AT1G21280		Chr1	7518946	7521552	AT1G21480		Chr4	11318316	11321794	AT4G21230			Chr1	4669883	4672901	AT1G13630			Chr5	26637099	26638702	AT5G66710			Chr5	9309365	9309804	AT5G26700
	Chr1	9232328	9233206	AT1G26710		Chr1	10018691	10020479	AT1G28500		Chr1	7453735	7454256	AT1G21313		Chr1	7523972	7524721	AT1G21475		Chr2	13413727	13416387	AT2G31500			Chr4	9871807	9873173	AT4G17760			Chr3	4165579	4169368	AT3G13020			Chr1	19706151	19706838	AT1G52905
	Chr1	9234099	9234939	AT1G26720		Chr1	10047276	10049343	AT1G28590		Chr1	7453245	7455009	AT1G21310		Chr1	7531312	7532745	AT1G21510		Chr2	15010373	15012799	AT2G35710			Chr5	18380973	18383572	AT5G45350			Chr2	12284829	12286913	AT2G28640			Chr5	20774482	20776852	AT5G51100
	Chr1	9253599	9254167	AT1G26762		Chr1	10053443	10055881	AT1G28610		Chr1	7460104	7460501	AT1G05647		Chr1	7543924	7544678	AT1G21529		Chr4	18021015	18022934	AT4G38530			Chr5	18600075	18601607	AT5G45850			Chr3	22370126	22370844	AT3G09445			Chr5	1720226	1722837	AT5G05730
	Chr1	9264404	9264580	AT1G26773		Chr1	10058456	10063460	AT1G28630		Chr1	7462327	7466164	AT1G21320		Chr1	7545149	7546988	AT1G21530		Chr1	8520487	8524649	AT1G24090			Chr1	10537852	10538731	AT1G30040			Chr4	5198649	5203418	AT4G08260			Chr2	6390313	6391779	AT2G14870
	Chr1	9270952	9272713	AT1G26780		Chr1	10067563	10069177	AT1G28640		Chr1	7466694	7467359	AT1G21323		Chr1	7548450	7550741	AT1G21540		Chr1	8520487	8524649	AT1G24095			Chr1	27385431	27388480	AT1G72760			Chr3	20053429	20056533	AT3G54160			Chr3	19679216	19680595	AT3G53090
	Chr1	9273684	9275193	AT1G26790		Chr1	10069365	10071108	AT1G28650		Chr1	7468765	7469995	AT1G21326		Chr1	7552987	7553975	AT1G21550		Chr5	22219444	22221928	AT5G54690			Chr1	4568050	4571069	AT1G13330			Chr5	14756474	14757509	AT5G05455			Chr3	18518877	18520510	AT3G08090
	Chr1	9276381	9276954	AT1G26795		Chr1	10071609	10073549	AT1G28660		Chr1	7473011	7473358	AT1G05657		Chr1	7579129	7580171	AT1G21620		Chr1	7512085	7514203	AT1G21460			Chr1	4568050	4571069	AT1G13340			Chr5	17370487	17370726	AT5G43285			Chr1	1721572	1723233	AT1G05750
	Chr1	9278953	9279482	AT1G26796		Chr1	10081871	10083122	AT1G28695		Chr1	7476022	7476899	AT1G21340		Chr1	7628456	7629364	AT1G21722		Chr1	27873575	27876402	AT1G74130			Chr5	1330612	1334843	AT5G04630			Chr1	21339754	21341662	AT1G57613			Chr4	8887853	8891181	AT4G15562
	Chr1	9280955	9281560	AT1G26797		Chr1	10083500	10085030	AT1G28700		Chr1	7481184	7483513	AT1G21360		Chr1	7640906	7645240	AT1G21740		Chr1	1375978	1379016	AT1G04880			Chr5	1330612	1334843	AT5G04640			Chr1	9643329	9647236	AT1G27720			Chr4	8887853	8891181	AT4G15563
	Chr1	9281791	9282341	AT1G26798		Chr1	10112564	10114491	AT1G29000		Chr1	7500845	7502186	AT1G21430		Chr1	7667803	7670530	AT1G21850		Chr3	15954204	15957685	AT3G44265			Chr1	1375991	1378704	AT1G04880			Chr5	7553976	7555799	AT5G22740			Chr1	13279938	13280222	AT1G35780
	Chr1	9283873	9284438	AT1G26799		Chr1	10114912	10115749	AT1G29005		Chr1	7511750	7513481	AT1G21460		Chr1	7671028	7674215	AT1G21860		Chr2	10806726	10807327	AT2G25370			Chr5	20891201	20892172	AT5G51440			Chr1	27385477	27388572	AT1G72760			Chr3	14720012	14723311	AT3G42630
	Chr1	9290870	9291301	AT1G26815		Chr1	10117715	10119085	AT1G29010		Chr1	7516009	7517637	AT1G21470		Chr1	7675502	7675971	AT1G21864		Chr1	23128751	23131505	AT1G62480			Chr2	7072149	7073436	AT2G16340			Chr3	20206405	20208720	AT3G54590			Chr1	9319442	9322335	AT1G26900
	Chr1	9291723	9292147	AT1G06027		Chr1	10120300	10122973	AT1G29020		Chr1	7518946	7521552	AT1G21480		Chr1	7677499	7677959	AT1G21866		Chr1	23128751	23131505	AT1G62490			Chr3	3470837	3474129	AT3G11080			Chr1	20125348	20126907	AT1G53890			Chr1	9319442	9322335	AT1G26910
	Chr1	9292446	9293862	AT1G26820		Chr1	10120300	10122973	AT1G29020		Chr1	7523972	7524721	AT1G21475		Chr1	7678208	7679843	AT1G21870		Chr2	10686892	10687652	AT2G08105			Chr2	15508826	15509565	AT2G36920			Chr4	13247558	13248810	AT4G26140			Chr1	17873761	17875047	AT1G48370
	Chr1	9312936	9315122	AT1G26870		Chr1	10124286	10127098	AT1G29025		Chr1	7531312	7532745	AT1G21510		Chr1	7682584	7685662	AT1G21890		Chr5	3881097	3884587	AT5G12020			Chr2	10814497	10815599	AT2G25410			Chr2	6364338	6364769	AT2G14830			Chr2	9468972	9472527	AT2G22300
	Chr1	9315305	9318277	AT1G26880		Chr1	10136246	10139228	AT1G29050		Chr1	7534019	7534927	AT1G21520		Chr1	7715170	7716975	AT1G21940		Chr5	23399797	23403031	AT5G57770			Chr2	10814497	10815599	AT2G25409			Chr1	21995455	21996236	AT1G59780			Chr3	10254852	10255313	AT3G27680
	Chr1	9317589	9319246	AT1G26890		Chr1	10157494	10158805	AT1G29080		Chr1	7543924	7544678	AT1G21529		Chr1	7723162	7723954	AT1G21950		Chr1	7759533	7762047	AT1G22030			Chr1	24437096	24438481	AT1G65710			Chr4	8219809	8221811	AT4G14276			Chr3	7803755	7807016	AT3G22125
	Chr1	9329493	9330612	AT1G26920		Chr1	10162795	10164452	AT1G29090		Chr1	7545149	7546988	AT1G21530		Chr1	7725972	7726586	AT1G21960		Chr1	1511910	1515219	AT1G05220			Chr5	291971	294625	AT5G01760			Chr1	20112813	20114323	AT1G53870			Chr3	7803755	7807016	AT3G22142
	Chr1	9351160	9352833	AT1G26945		Chr1	10168717	10169916	AT1G29100		Chr1	7548450	7550741	AT1G21540		Chr1	7727577	7729649	AT1G21970		Chr1	1511910	1515219	AT1G04353			Chr5	291971	294625	AT5G01770			Chr5	26603175	26604291	AT5G66650			Chr5	838001	839532	AT5G03400
	Chr1	9359325	9361833	AT1G26970		Chr1	10171683	10173071	AT1G29110		Chr1	7552987	7553975	AT1G21550		Chr1	7727577	7729649	AT1G21970		Chr1	1511910	1515219	AT1G05230			Chr1	20032203	20033665	AT1G53655			Chr1	17957896	17959976	AT1G48580			Chr5	21338017	21339621	AT5G52580
	Chr1	9363196	9363288	AT1G26973		Chr1	10178902	10180225	AT1G29140		Chr1	7579129	7580171	AT1G21620		Chr1	7740530	7742106	AT1G21990		Chr3	2333285	2334002	AT3G07320			Chr3	20439351	20442536	AT3G55140			Chr1	22637429	22640959	AT1G61360			Chr2	440447	440791	AT2G01950
	Chr1	9364471	9364570	AT1G26975		Chr1	10183390	10184512	AT1G29160		Chr1	7628456	7629364	AT1G21722		Chr1	7744094	7745744	AT1G22000		Chr3	20117755	20118641	AT3G54320			Chr3	20439351	20442536	AT3G55150			Chr2	17337672	17344799	AT2G41590			Chr3	10113567	10114569	AT3G27329
	Chr1	9364749	9365610	AT1G26976		Chr1	10198764	10200255	AT1G29179		Chr1	7640906	7645240	AT1G21740		Chr1	7750994	7753519	AT1G22015		Chr5	23412684	23413617	AT5G57790			Chr5	3432651	3435313	AT5G10880			Chr4	7952673	7956365	AT4G13690			Chr2	8362618	8364155	AT2G19280
	Chr1	9378404	9380790	AT1G27020		Chr1	10199628	10200962	AT1G29180		Chr1	7667803	7670530	AT1G21850		Chr1	7749571	7750062	AT1G22010		Chr3	9974788	9977975	AT3G27040			Chr5	3432651	3435313	AT5G10890			Chr5	17484596	17484773	AT5G43518			Chr1	12443762	12447098	AT1G34170
	Chr1	9381527	9384060	AT1G27030		Chr1	10202414	10203491	AT1G29195		Chr1	7671028	7674215	AT1G21860		Chr1	7759077	7760929	AT1G22030		Chr3	17899780	17900504	AT3G48343			Chr5	26401336	26404776	AT5G66020			Chr3	3722986	3723735	AT3G11773			Chr4	8859658	8860445	AT4G06330
	Chr1	9386693	9390042	AT1G27040		Chr1	10207577	10210622	AT1G29200		Chr1	7675502	7675971	AT1G21864		Chr1	7792192	7795440	AT1G22080		Chr3	8002166	8003763	AT3G22580			Chr1	29262241	29264084	AT1G77810			Chr1	13345457	13349748	AT1G35895			Chr2	13325219	13329248	AT2G31260
	Chr1	9412783	9417604	AT1G27110		Chr1	10236337	10237990	AT1G29280		Chr1	7677499	7677959	AT1G21866		Chr1	7795708	7797425	AT1G22090		Chr5	147559	150170	AT5G01360			Chr5	3532108	3533487	AT5G11100			Chr4	248975	250561	AT4G00580			Chr2	11203715	11207779	AT2G26320
	Chr1	9452632	9452831	AT1G06047		Chr1	10244453	10245874	AT1G29290		Chr1	7678208	7679843	AT1G21870		Chr1	7797593	7797802	AT1G05713		Chr4	17813909	17815501	AT4G37890			Chr1	7849969	7854023	AT1G22230			Chr5	10930432	10932459	AT5G28910			Chr5	23651939	23654494	AT5G58510
	Chr1	9463806	9465444	AT1G27220		Chr1	10371675	10374005	AT1G29660		Chr1	7682584	7685662	AT1G21890		Chr1	7798023	7800228	AT1G22100		Chr4	17813909	17815501	AT4G37895			Chr1	7849969	7854023	AT1G22240			Chr3	8007070	8009496	AT3G22600			Chr4	13315271	13317432	AT4G26310
	Chr1	9466237	9467076	AT1G27240		Chr1	10375599	10377871	AT1G29670		Chr1	7696427	7697831	AT1G21910		Chr1	7800507	7804061	AT1G22110		Chr3	8564803	8567762	AT3G23770			Chr3	16898444	16903146	AT3G45990			Chr3	8007070	8009496	AT3G22620			Chr3	337417	340847	AT3G02020
	Chr1	9537736	9539027	AT1G27461		Chr1	10377790	10378961	AT1G29680		Chr1	7715170	7716975	AT1G21940		Chr1	7806309	7809632	AT1G22120		Chr4	13000881	13001880	AT4G25433			Chr5	25390520	25392666	AT5G63390			Chr3	18078705	18083133	AT3G48770			Chr3	337417	340847	AT3G02010
	Chr1	9546373	9547073	AT1G27490		Chr1	10393659	10399873	AT1G29720		Chr1	7723162	7723954	AT1G21950		Chr1	7812211	7814345	AT1G22130		Chr2	17291027	17291987	AT2G41470			Chr2	15010525	15012499	AT2G35710			Chr3	10700228	10703742	AT3G28550			Chr3	6809832	6810164	AT3G19600
	Chr1	9568813	9569330	AT1G27550		Chr1	10393659	10399873	AT1G29720		Chr1	7725972	7726586	AT1G21960		Chr1	7814473	7814738	AT1G05717		Chr3	23142992	23144935	AT3G62570			Chr2	11794235	11797439	AT2G27650			Chr2	409588	411813	AT2G01905			Chr2	14859044	14861273	AT2G35280
	Chr1	9570397	9570962	AT1G27555		Chr1	10454433	10455874	AT1G29860		Chr1	7727577	7729649	AT1G21970		Chr1	7814663	7815722	AT1G22140		Chr5	22488257	22491769	AT5G55520			Chr2	13296209	13298311	AT2G31210			Chr5	9581027	9584695	AT5G27220			Chr5	21275953	21279510	AT5G52410
	Chr1	9589675	9589914	AT1G06103		Chr1	10456902	10458782	AT1G29870		Chr1	7727577	7729649	AT1G21970		Chr1	7817609	7821576	AT1G22150		Chr4	13816785	13820675	AT4G27660			Chr5	7827166	7828550	AT5G23240			Chr5	8240959	8241608	AT5G24270			Chr4	11751376	11752796	AT4G22210
	Chr1	9589807	9591075	AT1G27580		Chr1	10477885	10479114	AT1G29930		Chr1	7740530	7742106	AT1G21990		Chr1	7823066	7823971	AT1G22160		Chr4	13816785	13820675	AT4G27670			Chr3	20349516	20350164	AT3G54925			Chr2	18659695	18660095	AT2G45245			Chr1	20172435	20172759	AT1G54040
	Chr1	9589807	9591075	AT1G27580		Chr1	10537457	10540044	AT1G30040		Chr1	7744094	7745744	AT1G22000		Chr1	7841432	7844056	AT1G22210		Chr1	7131271	7134281	AT1G20590			Chr1	21711195	21713381	AT1G58430			Chr5	21351540	21351790	AT5G52630			Chr4	5437524	5439656	AT4G08545
	Chr1	9606968	9607996	AT1G27610		Chr1	10550855	10553295	AT1G30080		Chr1	7750994	7753519	AT1G22015		Chr1	7846459	7847836	AT1G22220		Chr1	7131271	7134281	AT1G20600			Chr5	16670673	16674241	AT5G41690			Chr5	26401220	26404996	AT5G66020			Chr3	21415848	21416889	AT3G57810
	Chr1	9608153	9610566	AT1G27620		Chr1	10571310	10573365	AT1G30100		Chr1	7749571	7750062	AT1G22010		Chr1	7849776	7851164	AT1G22230		Chr3	19316157	19317603	AT3G52080			Chr5	21870081	21871303	AT5G53870			Chr5	19447736	19447902	AT5G48000			Chr5	14702921	14703811	AT5G37150
	Chr1	9621398	9626067	AT1G27660		Chr1	10598542	10599696	AT1G30140		Chr1	7759077	7760929	AT1G22030		Chr1	7852904	7855213	AT1G22240		Chr3	22076138	22077341	AT3G59765			Chr1	20000458	20003776	AT1G53600			Chr5	10317207	10319180	AT5G28345			Chr2	10420001	10423066	AT2G24530
	Chr1	9627533	9628749	AT1G27670		Chr1	10606159	10607944	AT1G30160		Chr1	7765704	7766679	AT1G08955		Chr1	7858864	7859766	AT1G22250		Chr5	5974537	5978365	AT5G18060			Chr4	10065654	10068583	AT4G18180			Chr2	2346161	2349790	AT2G06025			Chr2	8413520	8415865	AT2G19430
	Chr1	9654475	9656089	AT1G27740		Chr1	10607888	10609618	AT1G30170		Chr1	7792192	7795440	AT1G22080		Chr1	7858868	7859504	AT1G05733		Chr3	6899892	6901217	AT3G19850			Chr4	10065654	10068583	AT4G18190			Chr5	6250968	6255366	AT5G18735			Chr5	19685772	19688621	AT5G48560
	Chr1	9704558	9706238	AT1G27860		Chr1	10618893	10620067	AT1G30190		Chr1	7795708	7797425	AT1G22090		Chr1	7890259	7892118	AT1G22340		Chr5	2653981	2656289	AT5G08250			Chr1	8894660	8896803	AT1G25360			Chr5	6250968	6255366	AT5G18740			Chr3	5711070	5715284	AT3G16785
	Chr1	9706657	9707298	AT1G27870		Chr1	10627185	10630630	AT1G30210		Chr1	7797593	7797802	AT1G05713		Chr1	7900355	7902427	AT1G22380		Chr5	26215960	26218105	AT5G65600			Chr3	14211212	14216468	AT3G00670			Chr1	12959615	12960202	AT1G35320			Chr1	8440523	8442051	AT1G23890
	Chr1	9714136	9715176	AT1G27890		Chr1	10632720	10635581	AT1G30220		Chr1	7798023	7800228	AT1G22100		Chr1	7903660	7906969	AT1G22400		Chr3	18148704	18150597	AT3G48950			Chr5	26216121	26218051	AT5G65600			Chr1	2073590	2075803	AT1G06750			Chr1	8440523	8442051	AT1G23900
	Chr1	9740508	9742159	AT1G27950		Chr1	10646842	10647650	AT1G30250		Chr1	7800507	7804061	AT1G22110		Chr1	7916076	7917518	AT1G22420		Chr1	29838512	29842111	AT1G79330			Chr1	20549227	20552528	AT1G55060			Chr5	19942758	19947519	AT5G49190			Chr5	16960252	16963816	AT5G42400
	Chr1	9752742	9753952	AT1G27990		Chr1	10709999	10711667	AT1G30350		Chr1	7806309	7809632	AT1G22120		Chr1	7922276	7925097	AT1G22440		Chr1	29838512	29842111	AT1G09985			Chr1	20549227	20552528	AT1G55070			Chr3	21398033	21402493	AT3G57780			Chr2	16467096	16468864	AT2G39440
	Chr1	9756674	9757963	AT1G28000		Chr1	10814612	10816615	AT1G30530		Chr1	7812211	7814345	AT1G22130		Chr1	7927287	7930657	AT1G22460		Chr1	2164513	2168341	AT1G07060			Chr3	6844144	6846504	AT3G19700			Chr3	3685328	3687544	AT3G11680			Chr5	16801941	16806592	AT5G42010
	Chr1	9756927	9757891	AT1G28005		Chr1	10868218	10871297	AT1G30650		Chr1	7814473	7814738	AT1G05717		Chr1	7938195	7940805	AT1G22490		Chr4	11184329	11186000	AT4G20900			Chr5	1150605	1152214	AT5G04190			Chr3	23246270	23247562	AT3G62890			Chr5	6755799	6757040	AT5G20000
	Chr1	9768889	9771157	AT1G28020		Chr1	10876724	10879143	AT1G30660		Chr1	7814663	7815722	AT1G22140		Chr1	7976424	7978810	AT1G22570		Chr5	1150359	1152364	AT5G04190			Chr1	340098	341758	AT1G01980			Chr5	16640534	16642647	AT5G41610			Chr3	16548715	16552274	AT3G45200
	Chr1	9771793	9773389	AT1G28030		Chr1	10879173	10880188	AT1G30670		Chr1	7817609	7821576	AT1G22150		Chr1	7987141	7989217	AT1G22600		Chr3	20986998	20991138	AT3G56670			Chr5	21530092	21531661	AT5G53110			Chr5	16640534	16642647	AT5G41612			Chr4	14435528	14436604	AT4G29305
	Chr1	9773580	9775481	AT1G28040		Chr1	10892445	10894714	AT1G30700		Chr1	7823066	7823971	AT1G22160		Chr1	8013353	8016150	AT1G22650		Chr3	20986998	20991138	AT3G56660			Chr4	10024939	10027251	AT4G18050			Chr1	18652184	18652893	AT1G50360			Chr3	2381390	2381966	AT3G07440
	Chr1	9782847	9784091	AT1G28070		Chr1	10892445	10894714	AT1G30700		Chr1	7841432	7844056	AT1G22210		Chr1	8024967	8026356	AT1G22680		Chr1	22709064	22712242	AT1G61560			Chr4	10024939	10027251	AT4G18060			Chr2	13128412	13129325	AT2G30810			Chr1	23959724	23961326	AT1G64530
	Chr1	9789691	9791546	AT1G28080		Chr1	10897925	10899975	AT1G30720		Chr1	7846459	7847836	AT1G22220		Chr1	8027126	8028168	AT1G22690		Chr1	22709064	22712242	AT1G61562			Chr2	17499448	17500910	AT2G41920			Chr2	1955282	1958654	AT2G05360			Chr3	20011017	20013440	AT3G54030
	Chr1	9794544	9794763	AT1G06113		Chr1	10895252	10897127	AT1G30710		Chr1	7849776	7851164	AT1G22230		Chr1	8030587	8033156	AT1G22710		Chr3	19081214	19083658	AT3G51410			Chr1	7759633	7760466	AT1G22030			Chr5	9990153	9993757	AT5G27960			Chr2	11784765	11787402	AT2G27610
	Chr1	9825169	9828118	AT1G28130		Chr1	10900681	10902626	AT1G30730		Chr1	7852904	7855213	AT1G22240		Chr1	8055325	8059060	AT1G22760		Chr4	11134703	11138878	AT4G20790			Chr1	20624906	20626345	AT1G55290			Chr5	8565514	8566548	AT5G24900			Chr3	22002184	22003484	AT3G59570
	Chr1	9839316	9840124	AT1G28160		Chr1	10902995	10904739	AT1G30740		Chr1	7858864	7859766	AT1G22250		Chr1	8103612	8104605	AT1G22900		Chr5	7175406	7176215	AT5G21105			Chr4	1774119	1775591	AT4G03820			Chr1	18210737	18212456	AT1G49225			Chr2	9712825	9713548	AT2G22805
	Chr1	9841269	9842435	AT1G28170		Chr1	10918267	10920709	AT1G30760		Chr1	7858868	7859504	AT1G05733		Chr1	8104993	8108361	AT1G22910		Chr3	20705528	20707478	AT3G55780			Chr5	14587086	14589869	AT5G05345			Chr3	719586	723602	AT3G03130			Chr5	26276417	26278013	AT5G65685
	Chr1	9843023	9844561	AT1G28180		Chr1	10921835	10922072	AT1G06353		Chr1	7890259	7892118	AT1G22340		Chr1	8132396	8134388	AT1G22980		Chr4	12524493	12527205	AT4G24120			Chr4	13737008	13738785	AT4G27480			Chr3	16407553	16409831	AT3G44935			Chr5	26276417	26278013	AT5G09435
	Chr1	9862041	9864779	AT1G28230		Chr1	10923919	10926561	AT1G30780		Chr1	7894807	7897761	AT1G22360		Chr1	8139114	8140233	AT1G22990		Chr5	23851599	23853758	AT5G59090			Chr3	11963812	11966362	AT3G30370			Chr5	14138895	14140516	AT5G36000			Chr2	183981	185265	AT2G01422
	Chr1	9882237	9882450	AT1G06133		Chr1	10928659	10928968	AT1G06363		Chr1	7900355	7902427	AT1G22380		Chr1	8143227	8145174	AT1G23000		Chr4	18498821	18500128	AT4G39860			Chr4	13925512	13930152	AT4G28000			Chr2	1735249	1736191	AT2G04940			Chr5	14586898	14589970	AT5G05345
	Chr1	9882951	9884189	AT1G28270		Chr1	10928005	10928930	AT1G06357		Chr1	7903660	7906969	AT1G22400		Chr1	8147118	8149891	AT1G23010		Chr3	18897068	18901469	AT3G50840			Chr1	4773576	4774939	AT1G13950			Chr1	11230391	11230797	AT1G31358			Chr1	1864821	1866297	AT1G06140
	Chr1	9889101	9891015	AT1G28290		Chr1	10932713	10934066	AT1G30790		Chr1	7916076	7917518	AT1G22420		Chr1	8162414	8163149	AT1G23037		Chr3	18897068	18901469	AT3G50845			Chr5	17926096	17926702	AT5G44495			Chr3	1800147	1801929	AT3G06000			Chr5	902057	903302	AT5G03560
	Chr1	9896867	9899876	AT1G28300		Chr1	10935684	10936396	AT1G30795		Chr1	7922276	7925097	AT1G22440		Chr1	8164782	8166716	AT1G23040		Chr3	968620	971049	AT3G03800			Chr3	9128556	9130300	AT3G25060			Chr4	2960925	2965118	AT4G05612			Chr4	861148	865494	AT4G02795
	Chr1	9904710	9905516	AT1G28305		Chr1	10942648	10944727	AT1G30814		Chr1	7927287	7930657	AT1G22460		Chr1	8170693	8173085	AT1G23060		Chr5	24212180	24213217	AT5G60130			Chr1	1435614	1437351	AT1G05020			Chr4	9457374	9459397	AT4G16807			Chr3	1554814	1559620	AT3G05410
	Chr1	9906882	9907725	AT1G28306		Chr1	10974383	10976298	AT1G30840		Chr1	7932777	7933604	AT1G22470		Chr1	8173823	8175819	AT1G23070		Chr1	2073765	2075790	AT1G06750			Chr1	12554837	12559282	AT1G34390			Chr5	9536752	9540647	AT5G27110			Chr1	5974342	5976043	AT1G05313
	Chr1	9912203	9913837	AT1G28310		Chr1	10985063	10986295	AT1G30850		Chr1	7938195	7940805	AT1G22490		Chr1	8180189	8183650	AT1G23080		Chr1	23830686	23833357	AT1G64210			Chr4	11273315	11276260	AT4G21130			Chr5	9536752	9540647	AT5G27100			Chr3	4340151	4341532	AT3G13360
	Chr1	9951762	9953105	AT1G28360		Chr1	11004084	11005444	AT1G30920		Chr1	7976424	7978810	AT1G22570		Chr1	8184925	8189234	AT1G23090		Chr5	4987098	4989889	AT5G15360			Chr4	11273315	11276260	AT4G21120			Chr1	20987359	20992320	AT1G56120			Chr1	18894739	18900127	AT1G50970
	Chr1	9961055	9961745	AT1G28375		Chr1	11013511	11013942	AT1G06383		Chr1	7981722	7984334	AT1G22590		Chr1	8184925	8189234	AT1G23090		Chr1	6234047	6240036	AT1G18130			Chr1	18648588	18649209	AT1G50350			Chr3	9142065	9145563	AT3G25100			Chr1	27871095	27871383	AT1G74120
	Chr1	9966186	9968495	AT1G28390		Chr1	11014783	11015913	AT1G30930		Chr1	7987141	7989217	AT1G22600		Chr1	8195776	8196475	AT1G23100		Chr1	6234047	6240036	AT1G18140			Chr4	12811611	12814045	AT4G24890			Chr5	2572046	2576762	AT5G08030			Chr5	14598759	14604005	AT5G36960
	Chr1	9967837	9968056	AT1G06153		Chr1	11016492	11016886	AT1G06387		Chr1	8013353	8016150	AT1G22650		Chr1	8196447	8198331	AT1G23110		Chr4	8515843	8517013	AT4G14850			Chr3	2866600	2868076	AT3G09330			Chr5	2572046	2576762	AT5G08020			Chr4	11774811	11778083	AT4G22270
	Chr1	9972185	9973942	AT1G28400		Chr1	11009888	11012280	AT1G30925		Chr1	8024967	8026356	AT1G22680		Chr1	8197543	8198108	AT1G05787		Chr4	8515843	8517013	AT4G14860			Chr1	21555010	21558079	AT1G58215			Chr5	21399737	21400430	AT5G52810			Chr4	11774811	11778083	AT4G22280
	Chr1	9992661	9994656	AT1G28430		Chr1	11032358	11032898	AT1G06393		Chr1	8027126	8028168	AT1G22690		Chr1	8198586	8199616	AT1G23120		Chr3	20573955	20576372	AT3G55500			Chr4	17221736	17225596	AT4G36490			Chr5	10379529	10383207	AT5G28463			Chr1	22295994	22297176	AT1G60505
	Chr1	10003880	10004581	AT1G28450		Chr1	11032549	11033244	AT1G09095		Chr1	8030587	8033156	AT1G22710		Chr1	8200321	8201246	AT1G23130		Chr2	8984971	8987422	AT2G20880			Chr4	12852243	12853920	AT4G25000			Chr5	10775963	10780199	AT5G28730			Chr1	13345426	13349773	AT1G35895
	Chr1	10006230	10006778	AT1G28460		Chr1	11035992	11037508	AT1G30950		Chr1	8055325	8059060	AT1G22760		Chr1	8202146	8203301	AT1G23140		Chr2	19599790	19602060	AT2G47860			Chr3	19940723	19943207	AT3G53830			Chr1	8520612	8524728	AT1G24090			Chr1	29452812	29456135	AT1G78280
	Chr1	10012637	10013263	AT1G06163		Chr1	11051999	11053295	AT1G30990		Chr1	8071789	8075020	AT1G05767		Chr1	8203933	8204318	AT1G23145		Chr3	3533338	3534865	AT3G11280			Chr3	6045132	6048207	AT3G17690			Chr1	8520612	8524728	AT1G24095			Chr1	19542897	19546666	AT1G52450
	Chr1	10013434	10014256	AT1G28480		Chr1	11053377	11054567	AT1G31000		Chr1	8074231	8075037	AT1G22810		Chr1	8205161	8205381	AT1G05793		Chr3	8788954	8791209	AT3G24255			Chr1	18730922	18734192	AT1G50580			Chr5	17487922	17494602	AT5G43530			Chr1	17064245	17065939	AT1G45130
	Chr1	10010124	10012258	AT1G28470		Chr1	11069510	11072564	AT1G31040		Chr1	8103612	8104605	AT1G22900		Chr1	8205872	8206243	AT1G23147		Chr3	9287493	9289845	AT3G25570			Chr1	18730922	18734192	AT1G50590			Chr5	17428633	17430863	AT5G43401			Chr5	10334275	10336487	AT5G28370
	Chr1	10018691	10020479	AT1G28500		Chr1	11069510	11072564	AT1G31040		Chr1	8104993	8108361	AT1G22910		Chr1	8206549	8207618	AT1G23150		Chr1	17082915	17083229	AT1G45160			Chr3	2944929	2945314	AT3G09590			Chr3	6911436	6912661	AT3G19880			Chr2	8733331	8736491	AT2G20250
	Chr1	10047276	10049343	AT1G28590		Chr1	11075398	11079289	AT1G31050		Chr1	8132396	8134388	AT1G22980		Chr1	8209226	8211486	AT1G23160		Chr2	16765955	16769107	AT2G40130			Chr4	10366104	10366862	AT4G18910			Chr5	16169629	16173900	AT5G40410			Chr4	1357252	1359052	AT4G03070
	Chr1	10053443	10055881	AT1G28610		Chr1	11094407	11095649	AT1G31090		Chr1	8139114	8140233	AT1G22990		Chr1	8227133	8229661	AT1G23200		Chr5	3432627	3435323	AT5G10880			Chr1	27993531	27996732	AT1G74480			Chr5	16169629	16173900	AT5G40405			Chr3	14311786	14316145	AT3G42155
	Chr1	10058456	10063460	AT1G28630		Chr1	11117941	11119785	AT1G31140		Chr1	8143227	8145174	AT1G23000		Chr1	8230047	8230978	AT1G23201		Chr5	3432627	3435323	AT5G10890			Chr1	27993531	27996732	AT1G74490			Chr5	19686752	19688114	AT5G48560			Chr3	14311786	14316145	AT3G42160
	Chr1	10067563	10069177	AT1G28640		Chr1	11128732	11130239	AT1G31163		Chr1	8147118	8149891	AT1G23010		Chr1	8233953	8235019	AT1G23205		Chr4	17569917	17572638	AT4G37370			Chr1	10346920	10349338	AT1G29620			Chr5	14347687	14349162	AT5G36420			Chr1	17957876	17959820	AT1G48580
	Chr1	10069365	10071108	AT1G28650		Chr1	11137539	11137915	AT1G31173		Chr1	8162414	8163149	AT1G23037		Chr1	8240145	8242261	AT1G23210		Chr4	17569917	17572638	AT4G37380			Chr1	5679113	5684706	AT1G16630			Chr1	29124789	29126108	AT1G77500			Chr1	18648320	18649263	AT1G50350
	Chr1	10071609	10073549	AT1G28660		Chr1	11166557	11167547	AT1G31250		Chr1	8164782	8166716	AT1G23040		Chr1	8252702	8254637	AT1G23240		Chr5	24747808	24751602	AT5G61550			Chr1	2198226	2199795	AT1G07160			Chr5	10024937	10025993	AT5G28010			Chr5	7941835	7944198	AT5G23570
	Chr1	10081871	10083122	AT1G28695		Chr1	11169450	11170396	AT1G31255		Chr1	8170693	8173085	AT1G23060		Chr1	8255127	8256770	AT1G23250		Chr3	17173666	17177614	AT3G46617			Chr5	26423783	26426313	AT5G66080			Chr3	2956202	2958202	AT3G09640			Chr3	8501861	8504792	AT3G23640
	Chr1	10083500	10085030	AT1G28700		Chr1	11169645	11170059	AT1G06427		Chr1	8173823	8175819	AT1G23070		Chr1	8262939	8266048	AT1G23300		Chr1	4966333	4970183	AT1G14520			Chr5	26423783	26426313	AT5G66090			Chr5	13868831	13872446	AT5G35695			Chr1	3780833	3786040	AT1G11270
	Chr1	10112564	10114491	AT1G29000		Chr1	11175559	11177362	AT1G31260		Chr1	8180189	8183650	AT1G23080		Chr1	8273423	8275350	AT1G23320		Chr2	18429234	18430800	AT2G44690			Chr2	19437729	19440206	AT2G47360			Chr1	12576902	12581857	AT1G34410			Chr1	23566036	23569410	AT1G63540
	Chr1	10114912	10115749	AT1G29005		Chr1	11178349	11179203	AT1G31270		Chr1	8184925	8189234	AT1G23090		Chr1	8283644	8286969	AT1G23340		Chr3	8955839	8957691	AT3G24542			Chr2	19437729	19440206	AT2G47370			Chr3	3638229	3639044	AT3G11550			Chr1	27499017	27501705	AT1G73130
	Chr1	10117715	10119085	AT1G29010		Chr1	11188120	11192585	AT1G31290		Chr1	8184925	8189234	AT1G23090		Chr1	8293020	8294264	AT1G23350		Chr3	20111390	20114062	AT3G54310			Chr2	6054409	6056821	AT2G14288			Chr4	8949822	8952006	AT4G15720			Chr2	8435130	8438373	AT2G19470
	Chr1	10119308	10119662	AT1G06187		Chr1	11188120	11192585	AT1G31290		Chr1	8195776	8196475	AT1G23100		Chr1	8297241	8302651	AT1G23380		Chr3	22670737	22674938	AT3G61250			Chr5	24667943	24671104	AT5G61350			Chr4	8949822	8952006	AT4G15730			Chr3	19092827	19093753	AT3G51460
	Chr1	10120300	10122973	AT1G29020		Chr1	11197612	11198128	AT1G06433		Chr1	8196447	8198331	AT1G23110		Chr1	8303208	8303425	AT1G05797		Chr5	815791	816632	AT5G03350			Chr4	5781889	5785204	AT4G09012			Chr5	3598856	3604277	AT5G11290			Chr5	4501489	4502176	AT5G13960
	Chr1	10136246	10139228	AT1G29050		Chr1	11198353	11200141	AT1G31310		Chr1	8197543	8198108	AT1G05787		Chr1	8303801	8304028	AT1G05803		Chr3	16548678	16552327	AT3G45200			Chr4	5781889	5785204	AT4G09020			Chr5	3598856	3604277	AT5G11300			Chr1	20831521	20834452	AT1G55730
	Chr1	10138284	10138715	AT1G06217		Chr1	11240451	11241099	AT1G31380		Chr1	8198586	8199616	AT1G23120		Chr1	8311984	8315876	AT1G23400		Chr2	18883251	18887886	AT2G45890			Chr2	16008152	16010507	AT2G38220			Chr4	16891545	16891779	AT4G09215			Chr5	23435837	23437306	AT5G57850
	Chr1	10157494	10158805	AT1G29080		Chr1	11241229	11241474	AT1G06437		Chr1	8200321	8201246	AT1G23130		Chr1	8314853	8315737	AT1G23410		Chr2	18883251	18887886	AT2G45900			Chr4	14369011	14370286	AT4G29140			Chr3	22297271	22303451	AT3G60330			Chr2	8288971	8292119	AT2G19120
	Chr1	10162795	10164452	AT1G29090		Chr1	11243182	11244392	AT1G31390		Chr1	8202146	8203301	AT1G23140		Chr1	8317297	8319491	AT1G23420		Chr4	8030322	8032311	AT4G13885			Chr1	8423267	8427018	AT1G23830			Chr4	16049579	16050557	AT4G33290			Chr4	8949822	8951326	AT4G15720
	Chr1	10168717	10169916	AT1G29100		Chr1	11245225	11246561	AT1G31400		Chr1	8203933	8204318	AT1G23145		Chr1	8319663	8320431	AT1G05817		Chr1	21615236	21616236	AT1G09685			Chr1	8423267	8427018	AT1G05837			Chr1	7344312	7345679	AT1G05617			Chr1	22261265	22263024	AT1G60420
	Chr1	10171683	10173071	AT1G29110		Chr1	11277417	11278462	AT1G31510		Chr1	8205161	8205381	AT1G05793		Chr1	8339668	8341072	AT1G23500		Chr1	19580124	19580629	AT1G52565			Chr1	8423267	8427018	AT1G23840			Chr3	10115608	10118492	AT3G27331			Chr3	22476536	22480912	AT3G60840
	Chr1	10178902	10180225	AT1G29140		Chr1	11278983	11279639	AT1G31520		Chr1	8205872	8206243	AT1G23147		Chr1	8341388	8342796	AT1G23510		Chr3	2908434	2910267	AT3G09450			Chr1	8423267	8427018	AT1G23850			Chr3	10115608	10118492	AT3G27330			Chr1	12554690	12559835	AT1G34390
	Chr1	10183390	10184512	AT1G29160		Chr1	11281188	11282468	AT1G31530		Chr1	8206549	8207618	AT1G23150		Chr1	8343424	8344839	AT1G23520		Chr4	6102609	6106696	AT4G09660			Chr3	16828644	16832265	AT3G45800			Chr1	3690351	3691092	AT1G11070			Chr4	10082181	10083795	AT4G18240
	Chr1	10198764	10200255	AT1G29179		Chr1	11288378	11293799	AT1G31540		Chr1	8209226	8211486	AT1G23160		Chr1	8345595	8346733	AT1G23530		Chr5	16721452	16725354	AT5G41780			Chr1	17873821	17874931	AT1G48370			Chr5	5538740	5543467	AT5G16850			Chr2	16007902	16010393	AT2G38220
	Chr1	10199628	10200962	AT1G29180		Chr1	11288378	11293799	AT1G31540		Chr1	8227133	8229661	AT1G23200		Chr1	8346827	8350068	AT1G23540		Chr4	13021950	13022611	AT4G25490			Chr5	16171710	16173889	AT5G40410			Chr3	16826553	16832426	AT3G45800			Chr5	8439383	8441124	AT5G24655
	Chr1	10202414	10203491	AT1G29195		Chr1	11316941	11317894	AT1G31620		Chr1	8230047	8230978	AT1G23201		Chr1	8350728	8352791	AT1G23550		Chr3	4083205	4083599	AT3G12833			Chr5	16171710	16173889	AT5G40420			Chr4	6913387	6920082	AT4G11373			Chr1	8815249	8818702	AT1G25112
	Chr1	10213788	10214349	AT1G09065		Chr1	11318528	11319547	AT1G31630		Chr1	8233953	8235019	AT1G23205		Chr1	8352615	8354619	AT1G23560		Chr3	4083205	4083599	AT3G12835			Chr5	6585387	6588792	AT5G19520			Chr4	17028146	17030210	AT4G35970			Chr1	8815249	8818702	AT1G25141
	Chr1	10229808	10231384	AT1G29270		Chr1	11343854	11347945	AT1G31690		Chr1	8240145	8242261	AT1G23210		Chr1	8357446	8358805	AT1G23580		Chr5	17985952	17989510	AT5G44590			Chr1	26107130	26110237	AT1G69450			Chr2	11202758	11207673	AT2G26310			Chr2	10842052	10843539	AT2G25480
	Chr1	10236337	10237990	AT1G29280		Chr1	11337536	11341889	AT1G31670		Chr1	8252702	8254637	AT1G23240		Chr1	8359125	8360645	AT1G23590		Chr1	5639075	5639961	AT1G16500			Chr4	14531007	14534172	AT4G29654			Chr5	600950	602905	AT5G02660			Chr1	24162682	24164068	AT1G65040
	Chr1	10244453	10245874	AT1G29290		Chr1	11349697	11355587	AT1G31710		Chr1	8255127	8256770	AT1G23250		Chr1	8360978	8362485	AT1G23600		Chr2	15949078	15951118	AT2G38100			Chr4	14531007	14534172	AT4G29658			Chr1	23734877	23736020	AT1G63950			Chr1	876246	877541	AT1G03510
	Chr1	10371675	10374005	AT1G29660		Chr1	11356076	11358095	AT1G31720		Chr1	8262939	8266048	AT1G23300		Chr1	8362864	8363675	AT1G23610		Chr2	19437609	19440234	AT2G47360			Chr1	26005385	26007059	AT1G69170			Chr3	17652123	17653841	AT3G47840			Chr4	901410	902161	AT4G02060
	Chr1	10375599	10377871	AT1G29670		Chr1	11349697	11355587	AT1G31710		Chr1	8273423	8275350	AT1G23320		Chr1	8363895	8364276	AT1G05823		Chr2	19437609	19440234	AT2G47370			Chr1	22275516	22279622	AT1G60460			Chr3	17116953	17117611	AT3G46490			Chr4	9871823	9873279	AT4G17760
	Chr1	10377790	10378961	AT1G29680		Chr1	11377879	11379734	AT1G31772		Chr1	8283644	8286969	AT1G23340		Chr1	8366941	8368381	AT1G23640		Chr4	13495566	13496953	AT4G26830			Chr4	13598886	13601757	AT4G27110			Chr4	6849474	6850698	AT4G11250			Chr3	18226889	18230245	AT3G49170
	Chr1	10454433	10455874	AT1G29860		Chr1	11450315	11452068	AT1G31885		Chr1	8293020	8294264	AT1G23350		Chr1	8369097	8370340	AT1G23645		Chr1	8778280	8781793	AT1G24851			Chr3	4187322	4190653	AT3G13065			Chr1	28935743	28936359	AT1G09925			Chr2	13537704	13539628	AT2G31840
	Chr1	10456902	10458782	AT1G29870		Chr1	11488002	11489318	AT1G31990		Chr1	8297241	8302651	AT1G23380		Chr1	8371020	8371106	AT1G23650		Chr2	14062626	14063603	AT2G33175			Chr1	5425767	5429173	AT1G15760			Chr1	28935743	28936359	AT1G76990			Chr1	28123390	28125211	AT1G74860
	Chr1	10502335	10503023	AT1G09075		Chr1	11495823	11496107	AT1G06493		Chr1	8297241	8302651	AT1G23380		Chr1	8373239	8375897	AT1G23670		Chr2	11380586	11382109	AT2G26710			Chr1	5425767	5429173	AT1G15770			Chr1	8389603	8391325	AT1G23720			Chr2	1955232	1958405	AT2G05360
	Chr1	10537457	10540044	AT1G30040		Chr1	11497402	11497896	AT1G06497		Chr1	8303208	8303425	AT1G05797		Chr1	8354806	8356507	AT1G23570		Chr4	9721132	9721638	AT4G17410			Chr5	8545182	8547519	AT5G24870			Chr2	8835997	8838725	AT2G20510			Chr1	3104063	3105656	AT1G09580
	Chr1	10550855	10553295	AT1G30080		Chr1	11498282	11498595	AT1G06507		Chr1	8303801	8304028	AT1G05803		Chr1	8371609	8372845	AT1G23660		Chr3	19544570	19545321	AT3G08285			Chr4	12442630	12444450	AT4G23950			Chr1	11643361	11644521	AT1G32270			Chr2	1735396	1736224	AT2G04940
	Chr1	10571310	10573365	AT1G30100		Chr1	11498429	11498711	AT1G06513		Chr1	8304660	8304901	AT1G05807		Chr1	8373239	8375897	AT1G23670		Chr3	9574402	9576720	AT3G26170			Chr1	18987535	18988923	AT1G51210			Chr1	2166571	2168342	AT1G07060			Chr1	7909236	7909524	AT1G22403
	Chr1	10596352	10597341	AT1G30135		Chr1	11499282	11499519	AT1G06517		Chr1	8311984	8315876	AT1G23400		Chr1	8376687	8377156	AT1G23680		Chr5	3890143	3891286	AT5G12050			Chr4	12524660	12527178	AT4G24120			Chr5	5573466	5574076	AT5G02635			Chr5	24720139	24723710	AT5G61460
	Chr1	10598542	10599696	AT1G30140		Chr1	11499384	11499883	AT1G06523		Chr1	8314853	8315737	AT1G23410		Chr1	8377262	8378769	AT1G23690		Chr5	3036734	3039407	AT5G09780			Chr5	22131415	22133696	AT5G54510			Chr5	5573466	5574076	AT5G16960			Chr5	24720139	24723710	AT5G61470
	Chr1	10606159	10607944	AT1G30160		Chr1	11512552	11513067	AT1G32020		Chr1	8317297	8319491	AT1G23420		Chr1	8378972	8382290	AT1G23700		Chr2	6645836	6650178	AT2G15300			Chr2	1926917	1927833	AT2G04885			Chr4	929424	931863	AT4G02100			Chr1	20412213	20412738	AT1G07977
	Chr1	10607888	10609618	AT1G30170		Chr1	11514594	11515595	AT1G32030		Chr1	8319663	8320431	AT1G05817		Chr1	8388297	8391623	AT1G23720		Chr1	9175147	9178055	AT1G26558			Chr3	20808559	20813039	AT3G56080			Chr3	474210	476586	AT3G02330			Chr5	7133752	7135838	AT5G20995
	Chr1	10618893	10620067	AT1G30190		Chr1	11546160	11548016	AT1G32100		Chr1	8339668	8341072	AT1G23500		Chr1	8388297	8391623	AT1G23720		Chr1	28179873	28183461	AT1G75060			Chr4	13015465	13016127	AT4G25470			Chr3	11470511	11473982	AT3G29637			Chr5	7133752	7135838	AT5G03275
	Chr1	10627185	10630630	AT1G30210		Chr1	11562742	11564833	AT1G32140		Chr1	8341388	8342796	AT1G23510		Chr1	8395466	8398387	AT1G23730		Chr1	28179873	28183461	AT1G75050			Chr2	15986362	15988606	AT2G38160			Chr3	11470511	11473982	AT3G29638			Chr5	17535718	17538369	AT5G43660
	Chr1	10641031	10646195	AT1G30240		Chr1	11578506	11580547	AT1G32172		Chr1	8343424	8344839	AT1G23520		Chr1	8400056	8401550	AT1G23750		Chr1	12690642	12693640	AT1G34650			Chr3	22123499	22126502	AT3G59890			Chr4	2577928	2578096	AT4G05030			Chr2	7526544	7528025	AT2G17305
	Chr1	10646842	10647650	AT1G30250		Chr1	11581937	11583798	AT1G09115		Chr1	8345595	8346733	AT1G23530		Chr1	8401808	8404301	AT1G23760		Chr1	28163538	28164290	AT1G75000			Chr1	23796214	23800491	AT1G64110			Chr1	790279	792594	AT1G03230			Chr1	22287679	22290246	AT1G60490
	Chr1	10709999	10711667	AT1G30350		Chr1	11625616	11630745	AT1G32240		Chr1	8346827	8350068	AT1G23540		Chr1	8405214	8406266	AT1G23770		Chr5	2845805	2848287	AT5G08730			Chr1	12577601	12581477	AT1G34410			Chr1	8898099	8899898	AT1G25370			Chr3	10619940	10625378	AT3G28370
	Chr1	10868218	10871297	AT1G30650		Chr1	11642593	11645237	AT1G32270		Chr1	8350728	8352791	AT1G23550		Chr1	8409945	8412079	AT1G23790		Chr2	1536652	1538181	AT2G04425			Chr1	1601747	1604970	AT1G05460			Chr1	27845811	27846624	AT1G74045			Chr3	10619940	10625378	AT3G28380
	Chr1	10892445	10894714	AT1G30700		Chr1	11646189	11647001	AT1G32280		Chr1	8352615	8354619	AT1G23560		Chr1	8412051	8414886	AT1G23800		Chr1	29395547	29396133	AT1G78120			Chr4	14977388	14980311	AT4G30740			Chr4	11960429	11964292	AT4G22760			Chr1	29125191	29129810	AT1G77510
	Chr1	10897925	10899975	AT1G30720		Chr1	11666886	11668690	AT1G32350		Chr1	8357446	8358805	AT1G23580		Chr1	8417495	8418566	AT1G23810		Chr3	4584297	4586695	AT3G13900			Chr3	4090777	4095091	AT3G12860			Chr5	9203270	9207442	AT5G26270			Chr2	659237	661857	AT2G02480
	Chr1	10900681	10902626	AT1G30730		Chr1	11678886	11680839	AT1G32375		Chr1	8359125	8360645	AT1G23590		Chr1	8420265	8422985	AT1G23820		Chr1	1926701	1927670	AT1G06310			Chr3	4090777	4095091	AT3G12870			Chr3	10457475	10458015	AT3G28100			Chr2	9207284	9210165	AT2G21500
	Chr1	10902995	10904739	AT1G30740		Chr1	11701995	11702903	AT1G32420		Chr1	8360978	8362485	AT1G23600		Chr1	8420941	8421628	AT1G05833		Chr5	16406796	16410459	AT5G40940			Chr3	20601064	20602903	AT3G55550			Chr2	10027033	10030285	AT2G23560			Chr3	4951748	4953435	AT3G14740
	Chr1	10895252	10897127	AT1G30710		Chr1	11704932	11706357	AT1G32430		Chr1	8362864	8363675	AT1G23610		Chr1	8422960	8424088	AT1G23830		Chr5	926412	929691	AT5G03640			Chr4	14056672	14059717	AT4G28430			Chr2	10027033	10030285	AT2G23550			Chr5	2284968	2288490	AT5G07280
	Chr1	10918267	10920709	AT1G30760		Chr1	11715147	11719988	AT1G32450		Chr1	8363895	8364276	AT1G05823		Chr1	8423069	8424073	AT1G05837		Chr1	4839921	4842132	AT1G14150			Chr4	14056672	14059717	AT4G28420			Chr4	1550133	1552874	AT4G03490			Chr5	16238783	16243398	AT5G40550
	Chr1	10921835	10922072	AT1G06353		Chr1	11756691	11758118	AT1G32510		Chr1	8366941	8368381	AT1G23640		Chr1	8424142	8425385	AT1G23840		Chr1	4839921	4842132	AT1G14160			Chr2	10367640	10371713	AT2G24370			Chr5	19762510	19762892	AT5G07255			Chr3	9902778	9903669	AT3G26870
	Chr1	10923919	10926561	AT1G30780		Chr1	11774484	11775442	AT1G32560		Chr1	8369097	8370340	AT1G23645		Chr1	8425724	8427235	AT1G23850		Chr3	21004084	21006516	AT3G56705			Chr2	8779750	8782409	AT2G20340			Chr5	15919535	15927383	AT5G39770			Chr1	5442901	5443604	AT1G15800
	Chr1	10928659	10928968	AT1G06363		Chr1	11811040	11812380	AT1G32660		Chr1	8371020	8371106	AT1G23650		Chr1	8427257	8429498	AT1G23860		Chr1	6574227	6577419	AT1G19040			Chr4	14255995	14257683	AT4G28890			Chr4	8178019	8183035	AT4G14180			Chr1	1790307	1791399	AT1G05910
	Chr1	10928005	10928930	AT1G06357		Chr1	11813292	11813591	AT1G06603		Chr1	8373239	8375897	AT1G23670		Chr1	8451068	8451289	AT1G23910		Chr1	8423254	8427071	AT1G23830			Chr1	28070354	28070948	AT1G74710			Chr3	4951156	4953330	AT3G14740			Chr1	22998446	22999820	AT1G62260
	Chr1	10932713	10934066	AT1G30790		Chr1	11833113	11833706	AT1G32710		Chr1	8376687	8377156	AT1G23680		Chr1	8461757	8469573	AT1G23935		Chr1	8423254	8427071	AT1G05837			Chr1	17957913	17960183	AT1G48580			Chr2	18393412	18393781	AT2G44560			Chr1	830680	832458	AT1G03370
	Chr1	10935684	10936396	AT1G30795		Chr1	11865229	11867154	AT1G32770		Chr1	8377262	8378769	AT1G23690		Chr1	8461757	8469573	AT1G23935		Chr1	8423254	8427071	AT1G23840			Chr1	19574538	19575907	AT1G52560			Chr2	1792476	1797470	AT2G05050			Chr1	21253806	21255661	AT1G56690
	Chr1	10942648	10944727	AT1G30814		Chr1	11869752	11872926	AT1G32780		Chr1	8378972	8382290	AT1G23700		Chr1	8480422	8481599	AT1G23965		Chr1	8423254	8427071	AT1G23850			Chr4	16445210	16448149	AT4G34400			Chr5	14634724	14635701	AT5G37030			Chr2	11601825	11604362	AT2G27150
	Chr1	10974383	10976298	AT1G30840		Chr1	11902629	11907049	AT1G32850		Chr1	8354806	8356507	AT1G23570		Chr1	8481997	8483875	AT1G23970		Chr2	14539232	14541689	AT2G34500			Chr2	1793635	1797515	AT2G05050			Chr1	2977415	2979228	AT1G09220			Chr5	20764507	20766081	AT5G51070
	Chr1	10991478	10993083	AT1G30870		Chr1	11925320	11927302	AT1G32910		Chr1	8371609	8372845	AT1G23660		Chr1	8495908	8496566	AT1G24000		Chr5	2956939	2961225	AT5G09530			Chr2	2260738	2264796	AT2G05914			Chr5	18099083	18105998	AT5G44830			Chr5	9538058	9540680	AT5G27110
	Chr1	11000862	11003226	AT1G30910		Chr1	11945250	11948650	AT1G32960		Chr1	8388297	8391623	AT1G23720		Chr1	8498803	8499517	AT1G24010		Chr4	14894163	14894897	AT4G30470			Chr5	273430	277411	AT5G01730			Chr2	6402031	6405071	AT2G14900			Chr2	11080685	11082788	AT2G26000
	Chr1	11004084	11005444	AT1G30920		Chr1	11948650	11951982	AT1G32970		Chr1	8388297	8391623	AT1G23720		Chr1	8500119	8502065	AT1G24020		Chr3	8254085	8257464	AT3G23150			Chr5	273430	277411	AT5G01732			Chr1	25238674	25243240	AT1G67370			Chr5	22750622	22752603	AT5G56210
	Chr1	11013511	11013942	AT1G06383		Chr1	11953089	11953899	AT1G32975		Chr1	8395466	8398387	AT1G23730		Chr1	8509736	8510056	AT1G24060		Chr2	17360517	17364342	AT2G41640			Chr3	20745356	20746545	AT3G55930			Chr3	1606503	1607970	AT3G05540			Chr1	17778278	17779984	AT1G48120
	Chr1	11014783	11015913	AT1G30930		Chr1	11954278	11955362	AT1G32980		Chr1	8400056	8401550	AT1G23750		Chr1	8510401	8510967	AT1G24062		Chr2	17360517	17364342	AT2G41650			Chr2	16518950	16521467	AT2G39620			Chr5	4982425	4984128	AT5G15340			Chr1	888336	889921	AT1G08825
	Chr1	11016492	11016886	AT1G06387		Chr1	11962746	11964832	AT1G33020		Chr1	8401808	8404301	AT1G23760		Chr1	8515506	8515971	AT1G24068		Chr2	10367633	10371443	AT2G24370			Chr5	19484009	19488391	AT5G48090			Chr4	17227427	17229419	AT4G36510			Chr2	16091135	16091578	AT2G38420
	Chr1	11009888	11012280	AT1G30925		Chr1	11982889	11985299	AT1G33070		Chr1	8405214	8406266	AT1G23770		Chr1	8516166	8519984	AT1G24070		Chr4	6459919	6462301	AT4G10440			Chr1	30290605	30292081	AT1G80570			Chr2	13047553	13052315	AT2G30630			Chr1	20789093	20791094	AT1G55620
	Chr1	11032358	11032898	AT1G06393		Chr1	11985650	11990520	AT1G33080		Chr1	8409945	8412079	AT1G23790		Chr1	8516166	8519984	AT1G24070		Chr3	10707232	10709699	AT3G28560			Chr5	18006030	18012831	AT5G44635			Chr3	20951175	20955569	AT3G56550			Chr4	15545001	15546880	AT4G32190
	Chr1	11032549	11033244	AT1G09095		Chr1	11985650	11990520	AT1G33080		Chr1	8412051	8414886	AT1G23800		Chr1	8527714	8529018	AT1G24110		Chr5	25390414	25392655	AT5G63390			Chr5	18006030	18012831	AT5G44640			Chr1	5079121	5082468	AT1G14750			Chr3	17350599	17353047	AT3G47120
	Chr1	11035992	11037508	AT1G30950		Chr1	11993298	11996712	AT1G33090		Chr1	8417495	8418566	AT1G23810		Chr1	8534146	8535660	AT1G24130		Chr5	14324703	14324957	AT5G36310			Chr5	14268626	14273058	AT5G36228			Chr4	6356167	6359054	AT4G10210			Chr5	9621206	9624909	AT5G27300
	Chr1	11051999	11053295	AT1G30990		Chr1	11997500	12001421	AT1G33100		Chr1	8451068	8451289	AT1G23910		Chr1	8535999	8537780	AT1G24140		Chr1	2124502	2125783	AT1G06920			Chr5	22158396	22159015	AT5G54550			Chr3	10678614	10679578	AT3G28490			Chr2	4348398	4351966	AT2G11005
	Chr1	11053377	11054567	AT1G31000		Chr1	12002238	12003005	AT1G33102		Chr1	8461757	8469573	AT1G23935		Chr1	8542212	8543545	AT1G24147		Chr5	14945458	14947233	AT5G05505			Chr1	2254413	2256796	AT1G07340			Chr3	10300491	10302536	AT3G05295			Chr3	5640645	5644163	AT3G16565
	Chr1	11054731	11056959	AT1G31010		Chr1	12003122	12003821	AT1G09135		Chr1	8480422	8481599	AT1G23965		Chr1	8544248	8545590	AT1G24148		Chr5	24525294	24528022	AT5G60940			Chr1	21844177	21846400	AT1G59406			Chr1	17064234	17065614	AT1G45130			Chr1	4823468	4827356	AT1G14080
	Chr1	11069510	11072564	AT1G31040		Chr1	12026936	12030539	AT1G33170		Chr1	8481997	8483875	AT1G23970		Chr1	8571173	8572377	AT1G24200		Chr5	24525294	24528022	AT5G60950			Chr5	3975921	3979839	AT5G12290			Chr2	1340389	1344286	AT2G04060			Chr1	7493516	7493748	AT1G21400
	Chr1	11075398	11079289	AT1G31050		Chr1	12044872	12045879	AT1G33220		Chr1	8495908	8496566	AT1G24000		Chr1	8573544	8575184	AT1G24210		Chr2	17640896	17642469	AT2G42360			Chr5	3975921	3979839	AT5G12300			Chr1	16581411	16585748	AT1G43815			Chr4	11087800	11094017	AT4G20645
	Chr1	11094407	11095649	AT1G31090		Chr1	12072611	12073965	AT1G33280		Chr1	8498803	8499517	AT1G24010		Chr1	8578658	8582767	AT1G24220		Chr2	17640896	17642469	AT2G42365			Chr3	14949112	14952752	AT3G42870			Chr3	19996711	19997272	AT3G54000			Chr2	15388710	15393477	AT2G36710
	Chr1	11117941	11119785	AT1G31140		Chr1	12081009	12083619	AT1G33320		Chr1	8500119	8502065	AT1G24020		Chr1	8584039	8585135	AT1G24230		Chr1	28503826	28504979	AT1G09603			Chr2	19317391	19318833	AT2G47010			Chr5	13488414	13492369	AT5G35230			Chr5	16498926	16500805	AT5G41240
	Chr1	11128732	11130239	AT1G31163		Chr1	12127389	12130444	AT1G33440		Chr1	8509736	8510056	AT1G24060		Chr1	8588295	8589546	AT1G24250		Chr1	28503826	28504979	AT1G75920			Chr3	20573957	20576279	AT3G55500			Chr2	14109058	14109714	AT2G33290			Chr1	29312040	29314096	AT1G77960
	Chr1	11136187	11136397	AT1G06413		Chr1	12159884	12161314	AT1G33530		Chr1	8515506	8515971	AT1G24068		Chr1	8592078	8592989	AT1G24256		Chr5	26580686	26583734	AT5G66595			Chr4	854189	857772	AT4G01970			Chr2	14740439	14743861	AT2G34940			Chr1	2298196	2299443	AT1G07480
	Chr1	11137539	11137915	AT1G31173		Chr1	12162112	12164714	AT1G33540		Chr1	8516166	8519984	AT1G24070		Chr1	8593536	8596123	AT1G24260		Chr1	28855903	28857315	AT1G76870			Chr5	3517573	3519939	AT5G11080			Chr5	23811436	23814641	AT5G58980			Chr3	562154	563280	AT3G02630
	Chr1	11166557	11167547	AT1G31250		Chr1	12168768	12172119	AT1G33560		Chr1	8516166	8519984	AT1G24070		Chr1	8607851	8608763	AT1G24270		Chr1	8800830	8804308	AT1G25025			Chr3	10707250	10709349	AT3G28560			Chr1	888668	889904	AT1G08825			Chr1	17323757	17327381	AT1G47270
	Chr1	11169450	11170396	AT1G31255		Chr1	12188678	12190461	AT1G33610		Chr1	8527714	8529018	AT1G24110		Chr1	8651407	8653915	AT1G24400		Chr1	29774284	29775862	AT1G79150			Chr1	4599033	4599185	AT1G13400			Chr4	9860779	9862334	AT4G17718			Chr4	12686554	12687326	AT4G24570
	Chr1	11169645	11170059	AT1G06427		Chr1	12201963	12203408	AT1G33670		Chr1	8534146	8535660	AT1G24130		Chr1	8650622	8650899	AT1G05897		Chr4	5372163	5375623	AT4G05535			Chr1	2327420	2331603	AT1G07560			Chr3	19037206	19038994	AT3G51280			Chr2	13047523	13052343	AT2G30630
	Chr1	11175559	11177362	AT1G31260		Chr1	12219657	12220289	AT1G33710		Chr1	8535999	8537780	AT1G24140		Chr1	8654945	8655662	AT1G24405		Chr1	5596727	5600142	AT1G16370			Chr3	8254710	8257503	AT3G23150			Chr3	9943779	9945590	AT3G26960			Chr5	16479474	16481718	AT5G41170
	Chr1	11188120	11192585	AT1G31290		Chr1	12226852	12228556	AT1G33730		Chr1	8542212	8543545	AT1G24147		Chr1	8656021	8657997	AT1G24420		Chr1	5596727	5600142	AT1G16380			Chr4	5766698	5770379	AT4G08990			Chr5	1550182	1550918	AT5G05220			Chr1	2070819	2071989	AT1G06740
	Chr1	11197612	11198128	AT1G06433		Chr1	12232827	12233098	AT1G06703		Chr1	8544248	8545590	AT1G24148		Chr1	8658003	8659514	AT1G24430		Chr1	17273265	17275590	AT1G46984			Chr1	3667476	3669936	AT1G10980			Chr5	26713049	26716831	AT5G66890			Chr5	26596519	26598077	AT5G66631
	Chr1	11198353	11200141	AT1G31310		Chr1	12233006	12233266	AT1G06707		Chr1	8571173	8572377	AT1G24200		Chr1	8673914	8676408	AT1G24470		Chr1	29243914	29245339	AT1G77765			Chr4	12488319	12491069	AT4G24040			Chr5	26713049	26716831	AT5G66900			Chr1	21784807	21785343	AT1G58808
	Chr1	11230463	11230612	AT1G31358		Chr1	12233632	12236576	AT1G33750		Chr1	8573544	8575184	AT1G24210		Chr1	8676360	8677228	AT1G24480		Chr3	18220666	18221597	AT3G49155			Chr3	17481954	17482875	AT3G47440			Chr5	5383193	5384816	AT5G16486			Chr5	18238651	18239797	AT5G45115
	Chr1	11243182	11244392	AT1G31390		Chr1	12220858	12224108	AT1G33720		Chr1	8578658	8582767	AT1G24220		Chr1	8678858	8681894	AT1G24485		Chr1	17323770	17327303	AT1G47270			Chr5	17017867	17022415	AT5G42570			Chr5	5383193	5384816	AT5G16490			Chr1	19532058	19536336	AT1G52430
	Chr1	11277417	11278462	AT1G31510		Chr1	12237547	12238710	AT1G33760		Chr1	8584039	8585135	AT1G24230		Chr1	8688563	8689268	AT1G24520		Chr5	21419296	21421417	AT5G52860			Chr1	4715556	4718958	AT1G13750			Chr4	17037751	17038778	AT4G36000			Chr1	1294891	1298970	AT1G04650
	Chr1	11278983	11279639	AT1G31520		Chr1	12256474	12260638	AT1G33790		Chr1	8588295	8589546	AT1G24250		Chr1	8692630	8694705	AT1G24530		Chr3	270423	272638	AT3G01750			Chr1	11964194	11966262	AT1G33020			Chr5	6141945	6143531	AT5G18510			Chr3	19139781	19143208	AT3G51610
	Chr1	11281188	11282468	AT1G31530		Chr1	12256474	12260638	AT1G33790		Chr1	8592078	8592989	AT1G24256		Chr1	8701112	8702477	AT1G24545		Chr1	20624759	20627433	AT1G55290			Chr1	11964194	11966262	AT1G33030			Chr1	12401400	12405206	AT1G34070			Chr1	3424554	3428245	AT1G10417
	Chr1	11288378	11293799	AT1G31540		Chr1	12267808	12269913	AT1G33811		Chr1	8593536	8596123	AT1G24260		Chr1	8699650	8701458	AT1G24540		Chr1	10632648	10636707	AT1G30220			Chr1	17102159	17104927	AT1G45190			Chr1	10922280	10924674	AT1G30780			Chr3	22524427	22530003	AT3G60950
	Chr1	11288378	11293799	AT1G31540		Chr1	12278438	12279451	AT1G33820		Chr1	8607851	8608763	AT1G24270		Chr1	8706800	8709782	AT1G24570		Chr3	1047721	1051509	AT3G04050			Chr3	19081160	19083248	AT3G51410			Chr1	1728743	1729718	AT1G05783			Chr5	14138830	14140404	AT5G36000
	Chr1	11316941	11317894	AT1G31620		Chr1	12279947	12281406	AT1G33830		Chr1	8651407	8653915	AT1G24400		Chr1	8709941	8710824	AT1G24580		Chr3	1047721	1051509	AT3G04040			Chr2	18782548	18784229	AT2G45580			Chr1	17414606	17416249	AT1G47470			Chr3	10028621	10032798	AT3G27180
	Chr1	11318528	11319547	AT1G31630		Chr1	12283725	12285371	AT1G33840		Chr1	8650622	8650899	AT1G05897		Chr1	8710847	8711578	AT1G24575		Chr1	23773698	23776308	AT1G64060			Chr2	16463498	16467403	AT2G09045			Chr3	9653156	9653933	AT3G26350			Chr2	16876122	16877577	AT2G40420
	Chr1	11343854	11347945	AT1G31690		Chr1	12287913	12288210	AT1G33850		Chr1	8654945	8655662	AT1G24405		Chr1	8712478	8713225	AT1G24577		Chr4	626074	627814	AT4G01480			Chr2	16463498	16467403	AT2G39430			Chr3	6293510	6295825	AT3G18340			Chr4	8188545	8189736	AT4G14200
	Chr1	11337536	11341889	AT1G31670		Chr1	12294394	12295305	AT1G33860		Chr1	8656021	8657997	AT1G24420		Chr1	8714365	8715378	AT1G24590		Chr1	568636	570042	AT1G02650			Chr2	16463498	16467403	AT2G39435			Chr2	1251521	1252875	AT2G03965			Chr2	3410844	3411256	AT2G07715
	Chr1	11349697	11355587	AT1G31710		Chr1	12297238	12297525	AT1G06713		Chr1	8658003	8659514	AT1G24430		Chr1	8723627	8724711	AT1G24620		Chr1	28784002	28789608	AT1G09905			Chr3	15764260	15767911	AT3G43940			Chr2	1251521	1252875	AT2G04655			Chr2	10532686	10535833	AT2G24735
	Chr1	11356076	11358095	AT1G31720		Chr1	12301325	12303330	AT1G33870		Chr1	8673914	8676408	AT1G24470		Chr1	8734570	8737315	AT1G24650		Chr4	17150443	17152493	AT4G36250			Chr3	23211370	23213841	AT3G62740			Chr4	15552332	15556205	AT4G32200			Chr1	4954106	4956797	AT1G14470
	Chr1	11349697	11355587	AT1G31710		Chr1	12303862	12305203	AT1G33880		Chr1	8676282	8676343	AT1G24475		Chr1	8757864	8759645	AT1G24735		Chr5	2112788	2116339	AT5G06820			Chr1	30372983	30375701	AT1G80830			Chr3	15662113	15663893	AT3G43810			Chr1	4954106	4956797	AT1G14480
	Chr1	11377879	11379734	AT1G31772		Chr1	12308136	12309914	AT1G33890		Chr1	8676360	8677228	AT1G24480		Chr1	8845142	8846726	AT1G25240		Chr4	823515	824931	AT4G01910			Chr3	1732583	1735540	AT3G05820			Chr1	11000118	11000695	AT1G30900			Chr2	10501459	10502968	AT2G24690
	Chr1	11450315	11452068	AT1G31885		Chr1	12311518	12313518	AT1G33900		Chr1	8678858	8681894	AT1G24485		Chr1	8849006	8849506	AT1G05943		Chr3	20146051	20147957	AT3G54420			Chr2	18593918	18598359	AT2G45100			Chr5	16826381	16826606	AT5G42090			Chr1	7665443	7666710	AT1G21835
	Chr1	11488002	11489318	AT1G31990		Chr1	12314904	12316258	AT1G33910		Chr1	8688563	8689268	AT1G24520		Chr1	8849034	8851790	AT1G25250		Chr3	20146051	20147957	AT3G54430			Chr1	22729739	22730615	AT1G61600			Chr5	21352416	21354600	AT5G52640			Chr1	7665443	7666710	AT1G21840
	Chr1	11495823	11496107	AT1G06493		Chr1	12323474	12327311	AT1G33930		Chr1	8692630	8694705	AT1G24530		Chr1	8857726	8859909	AT1G25270		Chr3	22377650	22378357	AT3G09465			Chr3	4884237	4887151	AT3G14550			Chr2	14025538	14028962	AT2G33060			Chr5	1684571	1687537	AT5G05640
	Chr1	11497402	11497896	AT1G06497		Chr1	12319905	12320870	AT1G33920		Chr1	8701112	8702477	AT1G24545		Chr1	8871568	8872386	AT1G25300		Chr1	1060934	1064084	AT1G04110			Chr4	9800901	9803296	AT4G17590			Chr4	1877642	1884883	AT4G03950			Chr2	7695585	7698947	AT2G17720
	Chr1	11498282	11498595	AT1G06507		Chr1	12323474	12327311	AT1G33930		Chr1	8699650	8701458	AT1G24540		Chr1	8874124	8874834	AT1G25310		Chr5	2435812	2439237	AT5G07680			Chr1	1294926	1298940	AT1G04650			Chr3	22342395	22343411	AT3G60460			Chr4	17686038	17686957	AT4G37640
	Chr1	11498429	11498711	AT1G06513		Chr1	12330576	12332785	AT1G33940		Chr1	8706800	8709782	AT1G24570		Chr1	8876312	8876558	AT1G05957		Chr1	11834726	11837568	AT1G32720			Chr5	2956990	2961207	AT5G09530			Chr3	15827664	15833934	AT3G44070			Chr5	21494237	21496322	AT5G53010
	Chr1	11499282	11499519	AT1G06517		Chr1	12331977	12332469	AT1G33945		Chr1	8709941	8710824	AT1G24580		Chr1	8880267	8882100	AT1G25330		Chr5	9519758	9523645	AT5G27060			Chr1	2513432	2516557	AT1G08070			Chr1	9193417	9195460	AT1G26610			Chr5	6502807	6504639	AT5G19310
	Chr1	11499384	11499883	AT1G06523		Chr1	12332834	12340409	AT1G33950		Chr1	8710847	8711578	AT1G24575		Chr1	8877790	8880388	AT1G25320		Chr4	9367188	9371615	AT4G16640			Chr3	3509769	3512856	AT3G11200			Chr1	12861181	12866309	AT1G35150			Chr3	7093330	7094252	AT3G20340
	Chr1	11512552	11513067	AT1G32020		Chr1	12332834	12340409	AT1G33950		Chr1	8712478	8713225	AT1G24577		Chr1	8885020	8886777	AT1G25340		Chr3	16212466	16216262	AT3G44660			Chr3	3509769	3512856	AT3G11210			Chr5	24847457	24850085	AT5G61865			Chr4	16249744	16251016	AT4G33890
	Chr1	11514594	11515595	AT1G32030		Chr1	12346138	12348733	AT1G33960		Chr1	8714365	8715378	AT1G24590		Chr1	8914191	8915219	AT1G25410		Chr5	2127183	2131144	AT5G06850			Chr3	1698170	1702169	AT3G05740			Chr2	17619285	17619614	AT2G42290			Chr3	1092373	1094181	AT3G04160
	Chr1	11546160	11548016	AT1G32100		Chr1	12374259	12376367	AT1G34040		Chr1	8723627	8724711	AT1G24620		Chr1	8918789	8919892	AT1G25422		Chr4	10065203	10068713	AT4G18180			Chr3	7342387	7344757	AT3G20950			Chr3	8115614	8117183	AT3G22900			Chr3	19533519	19534699	AT3G52700
	Chr1	11562742	11564833	AT1G32140		Chr1	12380916	12385836	AT1G09185		Chr1	8734570	8737315	AT1G24650		Chr1	8922416	8923879	AT1G25425		Chr4	10065203	10068713	AT4G18190			Chr5	24129479	24132635	AT5G59920			Chr3	8115614	8117183	AT3G22910			Chr5	26603822	26604344	AT5G66650
	Chr1	11575320	11578030	AT1G32170		Chr1	12383777	12384244	AT1G06737		Chr1	8740205	8740469	AT1G24660		Chr1	8938387	8940613	AT1G25450		Chr4	10440247	10444752	AT4G19050			Chr3	8751924	8756196	AT3G00430			Chr1	3704656	3709417	AT1G11100			Chr5	13488311	13490684	AT5G35230
	Chr1	11578506	11580547	AT1G32172		Chr1	12384322	12385041	AT1G06743		Chr1	8757864	8759645	AT1G24735		Chr1	8941002	8941202	AT1G05967		Chr1	9355555	9357276	AT1G26960			Chr3	8751924	8756196	AT3G24210			Chr2	3490231	3490431	AT2G05365			Chr4	6688797	6689852	AT4G10890
	Chr1	11581937	11583798	AT1G09115		Chr1	12388595	12389447	AT1G34046		Chr1	8845142	8846726	AT1G25240		Chr1	8959087	8961183	AT1G25510		Chr2	367798	368792	AT2G01830			Chr1	9572440	9573934	AT1G06097			Chr1	20262624	20266947	AT1G54280			Chr4	734676	736001	AT4G01710
	Chr1	11625616	11630745	AT1G32240		Chr1	12390238	12390915	AT1G34047		Chr1	8849006	8849506	AT1G05943		Chr1	8964544	8967562	AT1G25530		Chr3	6710398	6713438	AT3G19370			Chr2	14407923	14412349	AT2G34100			Chr1	28943011	28947320	AT1G77010			Chr2	17575422	17577428	AT2G42160
	Chr1	11642593	11645237	AT1G32270		Chr1	12390448	12391149	AT1G34049		Chr1	8849034	8851790	AT1G25250		Chr1	9016252	9017450	AT1G25988		Chr3	18637831	18638762	AT3G50280			Chr5	15657260	15658714	AT5G39110			Chr1	28943011	28947320	AT1G77020			Chr3	19837377	19839137	AT3G53510
	Chr1	11646189	11647001	AT1G32280		Chr1	12393426	12396194	AT1G34050		Chr1	8857726	8859909	AT1G25270		Chr1	9063306	9065320	AT1G26200		Chr3	8293289	8297668	AT3G23240			Chr4	13124059	13127748	AT4G25800			Chr2	11786679	11790897	AT2G27630			Chr3	5779738	5780663	AT3G03395
	Chr1	11666886	11668690	AT1G32350		Chr1	12433356	12434735	AT1G34140		Chr1	8871568	8872386	AT1G25300		Chr1	9083838	9085464	AT1G26250		Chr1	22791761	22792939	AT1G61720			Chr1	214834	217583	AT1G01590			Chr3	11098509	11101278	AT3G29130			Chr4	6312465	6312968	AT4G10115
	Chr1	11701995	11702903	AT1G32420		Chr1	12591348	12593579	AT1G34440		Chr1	8874124	8874834	AT1G25310		Chr1	9083856	9085651	AT1G26255		Chr5	23993781	23997427	AT5G59530			Chr5	15504761	15508088	AT5G00545			Chr1	6106033	6109801	AT1G17750			Chr1	510004	513205	AT1G02470
	Chr1	11704932	11706357	AT1G32430		Chr1	12601014	12601360	AT1G06757		Chr1	8876312	8876558	AT1G05957		Chr1	9099994	9103644	AT1G26310		Chr5	23993781	23997427	AT5G59540			Chr5	22518649	22521009	AT5G55590			Chr1	22545188	22546371	AT1G61160			Chr1	11365950	11371129	AT1G31740
	Chr1	11715147	11719988	AT1G32450		Chr1	12595110	12602379	AT1G34460		Chr1	8880267	8882100	AT1G25330		Chr1	9105038	9107231	AT1G26320		Chr3	1104393	1106901	AT3G04210			Chr4	11774621	11778067	AT4G22270			Chr1	22545188	22546371	AT1G61150			Chr1	24086642	24088330	AT1G64810
	Chr1	11756691	11758118	AT1G32510		Chr1	12602761	12603484	AT1G06763		Chr1	8885020	8886777	AT1G25340		Chr1	9116010	9116781	AT1G26350		Chr5	21165431	21169853	AT5G52090			Chr4	11774621	11778067	AT4G22280			Chr5	22721414	22722258	AT5G56120			Chr2	10698584	10702085	AT2G25140
	Chr1	11774484	11775442	AT1G32560		Chr1	12602898	12603141	AT1G06773		Chr1	8914191	8915219	AT1G25410		Chr1	9117932	9118611	AT1G26355		Chr4	347781	351665	AT4G00820			Chr1	18474223	18477177	AT1G49900			Chr4	17093248	17097146	AT4G36120			Chr5	22721340	22722481	AT5G56120
	Chr1	11810531	11810724	AT1G32650		Chr1	12595110	12602379	AT1G34460		Chr1	8918789	8919892	AT1G25422		Chr1	9118822	9121227	AT1G26360		Chr4	17210360	17214210	AT4G36450			Chr1	29214379	29214760	AT1G77730			Chr1	1522840	1523882	AT1G04357			Chr3	10373100	10375417	AT3G27940
	Chr1	11811040	11812380	AT1G32660		Chr1	12607222	12609084	AT1G34480		Chr1	8922416	8923879	AT1G25425		Chr1	9126737	9128568	AT1G26380		Chr4	16643667	16644745	AT4G34950			Chr1	18499559	18500637	AT1G49960			Chr1	1522840	1523882	AT1G04363			Chr5	3974078	3978565	AT5G12290
	Chr1	11813292	11813591	AT1G06603		Chr1	12609440	12610495	AT1G34490		Chr1	8938387	8940613	AT1G25450		Chr1	9130013	9131779	AT1G26390		Chr5	25936041	25937367	AT5G64900			Chr2	11693321	11694586	AT2G27320			Chr3	14079042	14084362	AT3G33528			Chr4	8955448	8960087	AT4G15730
	Chr1	11833113	11833706	AT1G32710		Chr1	12611638	12612663	AT1G34500		Chr1	8941002	8941202	AT1G05967		Chr1	9133291	9134874	AT1G26400		Chr5	1912335	1914476	AT5G06270			Chr1	28537948	28540278	AT1G76040			Chr2	9584535	9588835	AT2G22560			Chr2	9006753	9008541	AT2G20960
	Chr1	11834022	11834226	AT1G32713		Chr1	12615690	12617032	AT1G34510		Chr1	8959087	8961183	AT1G25510		Chr1	9138604	9140439	AT1G26410		Chr5	576237	577191	AT5G02560			Chr2	5643724	5647753	AT2G13547			Chr2	118518	119257	AT2G01200			Chr1	17938762	17941514	AT1G48520
	Chr1	11860407	11860923	AT1G32763		Chr1	12623434	12624508	AT1G34520		Chr1	8964544	8967562	AT1G25530		Chr1	9141519	9143336	AT1G26420		Chr5	576237	577191	AT5G02570			Chr5	26713088	26714476	AT5G66890			Chr5	12657651	12661042	AT5G33393			Chr5	2117939	2119572	AT5G06830
	Chr1	11865229	11867154	AT1G32770		Chr1	12637054	12638692	AT1G34540		Chr1	9016252	9017450	AT1G25988		Chr1	9148636	9150250	AT1G26450		Chr5	23344630	23345892	AT5G57640			Chr1	27873608	27876040	AT1G74130			Chr1	29300671	29300842	AT1G77920			Chr5	22230990	22232117	AT5G54720
	Chr1	11869752	11872926	AT1G32780		Chr1	12643648	12643882	AT1G06777		Chr1	9063306	9065320	AT1G26200		Chr1	9155091	9156370	AT1G26470		Chr5	4097201	4099548	AT5G12960			Chr2	14864790	14866531	AT2G35310			Chr5	4082560	4085214	AT5G12930			Chr3	3409736	3412065	AT3G10900
	Chr1	11902629	11907049	AT1G32850		Chr1	12646674	12652646	AT1G34550		Chr1	9077874	9079646	AT1G26240		Chr1	9156279	9158093	AT1G26480		Chr5	23705547	23706834	AT5G58670			Chr3	19723416	19726727	AT3G53230			Chr1	12087608	12090129	AT1G33340			Chr4	14860537	14861398	AT4G30380
	Chr1	11902629	11907049	AT1G32850		Chr1	12657027	12658756	AT1G34575		Chr1	9077874	9079646	AT1G26240		Chr1	9159851	9161044	AT1G26510		Chr5	774925	777218	AT5G03250			Chr2	16444235	16445272	AT2G39370			Chr1	12087608	12090129	AT1G33350			Chr2	16265567	16268358	AT2G38960
	Chr1	11925320	11927302	AT1G32910		Chr1	12660497	12663870	AT1G34580		Chr1	9083838	9085464	AT1G26250		Chr1	9161810	9162910	AT1G26515		Chr2	17946200	17946380	AT2G43150			Chr5	22732128	22735349	AT5G56160			Chr5	2743953	2747678	AT5G08480			Chr3	2767947	2768397	AT3G09060
	Chr1	11945250	11948650	AT1G32960		Chr1	12692995	12697834	AT1G34650		Chr1	9083856	9085651	AT1G26255		Chr1	9158380	9159897	AT1G26500		Chr1	510722	513307	AT1G02470			Chr3	22524417	22530037	AT3G60950			Chr5	2743953	2747678	AT5G08490			Chr1	5184604	5186873	AT1G15060
	Chr1	11948650	11951982	AT1G32970		Chr1	12709090	12710665	AT1G34670		Chr1	9099994	9103644	AT1G26310		Chr1	9167549	9170953	AT1G26540		Chr1	11907653	11908863	AT1G32860			Chr3	19185081	19185602	AT3G51720			Chr4	18425648	18426744	AT4G39710			Chr1	4567227	4571721	AT1G13330
	Chr1	11953089	11953899	AT1G32975		Chr1	12743722	12745748	AT1G34760		Chr1	9105038	9107231	AT1G26320		Chr1	9178212	9181967	AT1G26560		Chr2	7256102	7258598	AT2G16720			Chr4	29304	30796	AT4G00070			Chr1	7860364	7865103	AT1G22260			Chr1	4567227	4571721	AT1G13340
	Chr1	11954278	11955362	AT1G32980		Chr1	12763902	12765686	AT1G34790		Chr1	9116010	9116781	AT1G26350		Chr1	9188945	9190896	AT1G26590		Chr2	19540555	19541429	AT2G47650			Chr1	18937752	18941617	AT1G51120			Chr3	10038598	10042932	AT3G27190			Chr3	16979252	16982765	AT3G46220
	Chr1	11962746	11964832	AT1G33020		Chr1	12851983	12853235	AT1G35140		Chr1	9117932	9118611	AT1G26355		Chr1	9191503	9192590	AT1G26600		Chr3	10004509	10008517	AT3G27140			Chr1	18937752	18941617	AT1G51130			Chr5	20792150	20794625	AT5G51160			Chr1	29549740	29551665	AT1G78570
	Chr1	11985650	11990520	AT1G33080		Chr1	12870563	12872257	AT1G35170		Chr1	9118822	9121227	AT1G26360		Chr1	9219460	9223795	AT1G26680		Chr3	6045072	6048347	AT3G17690			Chr2	6363925	6366544	AT2G14830			Chr5	20792150	20794625	AT5G51170			Chr1	20607137	20610394	AT1G55250
	Chr1	11993298	11996712	AT1G33090		Chr1	12879306	12879470	AT1G35181		Chr1	9126737	9128568	AT1G26380		Chr1	9227341	9227548	AT1G06007		Chr5	19417584	19420847	AT5G47950			Chr1	25769852	25772478	AT1G68640			Chr5	16587904	16588934	AT5G41450			Chr3	222307	226323	AT3G01580
	Chr1	11997500	12001421	AT1G33100		Chr1	12882654	12884762	AT1G35183		Chr1	9130013	9131779	AT1G26390		Chr1	9227378	9232437	AT1G26700		Chr3	16160291	16163209	AT3G44580			Chr5	15895820	15898085	AT5G39710			Chr5	1427185	1428375	AT5G04890			Chr2	12793171	12796514	AT2G29990
	Chr1	12002238	12003005	AT1G33102		Chr1	12896582	12897675	AT1G35210		Chr1	9133291	9134874	AT1G26400		Chr1	9227378	9232437	AT1G26700		Chr5	17172953	17177814	AT5G42830			Chr4	9833814	9834776	AT4G17670			Chr3	5801664	5802335	AT3G17010			Chr4	10335131	10335831	AT4G18823
	Chr1	12003122	12003821	AT1G09135		Chr1	12907870	12908342	AT1G06827		Chr1	9138604	9140439	AT1G26410		Chr1	9232328	9233206	AT1G26710		Chr2	12615747	12618115	AT2G29410			Chr1	2166368	2168346	AT1G07060			Chr5	16002834	16003909	AT5G39980			Chr1	26893007	26896016	AT1G71360
	Chr1	12072611	12073965	AT1G33280		Chr1	12917070	12917829	AT1G35230		Chr1	9141519	9143336	AT1G26420		Chr1	9234099	9234939	AT1G26720		Chr2	762404	763601	AT2G02720			Chr3	23378144	23381353	AT3G63280			Chr4	12811516	12814337	AT4G24890			Chr5	16001753	16003883	AT5G39980
	Chr1	12081009	12083619	AT1G33320		Chr1	12921893	12922566	AT1G09205		Chr1	9148636	9150250	AT1G26450		Chr1	9241036	9244918	AT1G26730		Chr5	24667922	24670494	AT5G61350			Chr3	9287393	9289726	AT3G25570			Chr5	18908298	18908487	AT5G46600			Chr2	12638373	12640008	AT2G29525
	Chr1	12127389	12130444	AT1G33440		Chr1	12932024	12934656	AT1G35250		Chr1	9156279	9158093	AT1G26480		Chr1	9259432	9261313	AT1G26770		Chr3	23419980	23422263	AT3G63430			Chr4	285992	289547	AT4G00700			Chr2	3312755	3315308	AT2G07629			Chr2	12638373	12640008	AT2G08345
	Chr1	12159884	12161314	AT1G33530		Chr1	12935647	12936586	AT1G35255		Chr1	9159851	9161044	AT1G26510		Chr1	9264404	9264580	AT1G26773		Chr4	9830751	9832986	AT4G17660			Chr1	23089701	23091374	AT1G62400			Chr2	3312755	3315308	AT2G00460			Chr5	5497801	5499627	AT5G16730
	Chr1	12162112	12164714	AT1G33540		Chr1	12936849	12937787	AT1G35260		Chr1	9161810	9162910	AT1G26515		Chr1	9270952	9272713	AT1G26780		Chr2	9443301	9444221	AT2G22200			Chr3	8008526	8009718	AT3G22620			Chr5	13223093	13223472	AT5G34905			Chr2	16041652	16042311	AT2G38290
	Chr1	12168768	12172119	AT1G33560		Chr1	12939071	12939354	AT1G06853		Chr1	9158380	9159897	AT1G26500		Chr1	9273684	9275193	AT1G26790		Chr4	8709925	8711475	AT4G15250			Chr2	19600288	19602054	AT2G47860			Chr1	28794013	28799672	AT1G76720			Chr5	15923177	15927417	AT5G39770
	Chr1	12188678	12190461	AT1G33610		Chr1	12947517	12948849	AT1G35290		Chr1	9167549	9170953	AT1G26540		Chr1	9276381	9276954	AT1G26795		Chr5	4932974	4934297	AT5G15190			Chr3	1687923	1692853	AT3G05720			Chr5	25923827	25924864	AT5G00710			Chr5	23609603	23611135	AT5G58410
	Chr1	12201963	12203408	AT1G33670		Chr1	12956119	12957090	AT1G35310		Chr1	9178212	9181967	AT1G26560		Chr1	9278953	9279482	AT1G26796		Chr2	19502645	19503584	AT2G47520			Chr1	26097833	26098900	AT1G69430			Chr3	3967167	3967595	AT3G12510			Chr2	8957015	8961248	AT2G20810
	Chr1	12217892	12218338	AT1G06697		Chr1	12958841	12962853	AT1G35320		Chr1	9188945	9190896	AT1G26590		Chr1	9280955	9281560	AT1G26797		Chr4	16200576	16201446	AT4G08835			Chr1	8549357	8551581	AT1G24150			Chr3	3967167	3967595	AT3G02535			Chr2	8957015	8961248	AT2G20815
	Chr1	12219657	12220289	AT1G33710		Chr1	12964986	12966113	AT1G35330		Chr1	9191503	9192590	AT1G26600		Chr1	9281791	9282341	AT1G26798		Chr4	16200576	16201446	AT4G08845			Chr3	21169333	21172716	AT3G57200			Chr1	7255599	7256827	AT1G20860			Chr4	7800642	7802173	AT4G13420
	Chr1	12226852	12228556	AT1G33730		Chr1	12958841	12962853	AT1G35320		Chr1	9219460	9223795	AT1G26680		Chr1	9283873	9284438	AT1G26799		Chr1	18639972	18642706	AT1G07627			Chr3	3625347	3627213	AT3G11520			Chr1	8426427	8426947	AT1G23850			Chr4	2730200	2735609	AT4G05360
	Chr1	12232827	12233098	AT1G06703		Chr1	12972058	12972304	AT1G06857		Chr1	9227341	9227548	AT1G06007		Chr1	9285025	9286395	AT1G26800		Chr5	15543106	15545377	AT5G38820			Chr4	17622919	17625565	AT4G37490			Chr2	10351545	10358282	AT2G24340			Chr5	7340280	7341844	AT5G22140
	Chr1	12233006	12233266	AT1G06707		Chr1	12972132	12972468	AT1G06863		Chr1	9227378	9232437	AT1G26700		Chr1	9290870	9291301	AT1G26815		Chr4	5634601	5635807	AT4G05605			Chr4	5174471	5176185	AT4G08190			Chr3	10129507	10130890	AT3G27360			Chr5	7340280	7341844	AT5G22145
	Chr1	12233632	12236576	AT1G33750		Chr1	12988649	12989373	AT1G35353		Chr1	9232328	9233206	AT1G26710		Chr1	9291723	9292147	AT1G06027		Chr1	1469649	1470331	AT1G05100			Chr2	14248602	14251692	AT2G33680			Chr3	10129507	10130890	AT3G27380			Chr1	22746156	22749149	AT1G61640
	Chr1	12237547	12238710	AT1G33760		Chr1	12991392	12992145	AT1G35365		Chr1	9234099	9234939	AT1G26720		Chr1	9292446	9293862	AT1G26820		Chr1	27385428	27388748	AT1G72760			Chr5	7829200	7830640	AT5G23250			Chr5	18334915	18338350	AT5G45275			Chr2	17277722	17281734	AT2G41450
	Chr1	12220858	12224108	AT1G33720		Chr1	13035294	13036037	AT1G35440		Chr1	9241036	9244918	AT1G26730		Chr1	9312936	9315122	AT1G26870		Chr5	15937098	15940326	AT5G39810			Chr5	20032928	20034642	AT5G49410			Chr2	18115541	18118888	AT2G43700			Chr1	24884969	24886745	AT1G66730
	Chr1	12241614	12245292	AT1G33770		Chr1	13061549	13063455	AT1G35490		Chr1	9241036	9244918	AT1G26730		Chr1	9315305	9318277	AT1G26880		Chr5	15937098	15940326	AT5G39820			Chr5	6142052	6144033	AT5G18510			Chr2	6837159	6848439	AT2G15710			Chr3	16898564	16903364	AT3G45990
	Chr1	12256474	12260638	AT1G33790		Chr1	13108634	13111700	AT1G35540		Chr1	9253599	9254167	AT1G26762		Chr1	9317589	9319246	AT1G26890		Chr5	16833113	16835099	AT5G42120			Chr3	22585946	22591309	AT3G61030			Chr1	5022950	5027194	AT1G14640			Chr1	22592521	22593962	AT1G61260
	Chr1	12267808	12269913	AT1G33811		Chr1	13110517	13112832	AT1G35545		Chr1	9259432	9261313	AT1G26770		Chr1	9351160	9352833	AT1G26945		Chr5	10337879	10341446	AT5G28380			Chr2	15624234	15624738	AT2G37210			Chr1	26043991	26047810	AT1G69280			Chr1	25347371	25351076	AT1G67635
	Chr1	12278438	12279451	AT1G33820		Chr1	13112506	13113136	AT1G35550		Chr1	9264404	9264580	AT1G26773		Chr1	9355827	9357502	AT1G26960		Chr5	76939	77993	AT5G01200			Chr5	6297557	6300021	AT5G18870			Chr3	22238441	22242481	AT3G60176			Chr1	25347371	25351076	AT1G67630
	Chr1	12279947	12281406	AT1G33830		Chr1	13158466	13160284	AT1G35625		Chr1	9270952	9272713	AT1G26780		Chr1	9359325	9361833	AT1G26970		Chr5	15596508	15599372	AT5G38970			Chr3	20817046	20819706	AT3G56100			Chr3	1379020	1382463	AT3G04980			Chr1	20534907	20536992	AT1G55040
	Chr1	12283725	12285371	AT1G33840		Chr1	13162966	13164512	AT1G35630		Chr1	9273684	9275193	AT1G26790		Chr1	9363196	9363288	AT1G26973		Chr2	19459128	19462473	AT2G47430			Chr4	17150848	17152479	AT4G36250			Chr4	2293746	2297274	AT4G04580			Chr2	636904	640121	AT2G02440
	Chr1	12287913	12288210	AT1G33850		Chr1	13220471	13224681	AT1G35710		Chr1	9276381	9276954	AT1G26795		Chr1	9364471	9364570	AT1G26975		Chr1	4931065	4932666	AT1G14420			Chr4	9508207	9512782	AT4G16900			Chr3	21169368	21173484	AT3G57200			Chr1	584278	587957	AT1G02690
	Chr1	12294394	12295305	AT1G33860		Chr1	13225168	13227239	AT1G35720		Chr1	9278953	9279482	AT1G26796		Chr1	9364749	9365610	AT1G26976		Chr1	19526733	19527329	AT1G52415			Chr5	6018397	6020540	AT5G18210			Chr4	2393183	2394151	AT4G04720			Chr2	10460489	10462260	AT2G24615
	Chr1	12297238	12297525	AT1G06713		Chr1	13227137	13229931	AT1G35730		Chr1	9280955	9281560	AT1G26797		Chr1	9378404	9380790	AT1G27020		Chr4	16325252	16327344	AT4G34071			Chr5	6018397	6020540	AT5G18220			Chr5	3386621	3390270	AT5G10720			Chr5	21416507	21417637	AT5G52850
	Chr1	12301325	12303330	AT1G33870		Chr1	13253398	13255570	AT1G35750		Chr1	9281791	9282341	AT1G26798		Chr1	9381527	9384060	AT1G27030		Chr4	16325252	16327344	AT4G34090			Chr4	11089013	11093980	AT4G20645			Chr3	19325244	19328480	AT3G52110			Chr2	12400870	12403518	AT2G28880
	Chr1	12308136	12309914	AT1G33890		Chr1	13281163	13282042	AT1G09235		Chr1	9283873	9284438	AT1G26799		Chr1	9386693	9390042	AT1G27040		Chr5	8784334	8786051	AT5G25310			Chr4	11089013	11093980	AT4G20650			Chr3	19325244	19328480	AT3G52115			Chr2	18986182	18988143	AT2G46240
	Chr1	12311518	12313518	AT1G33900		Chr1	13314707	13314965	AT1G06933		Chr1	9285025	9286395	AT1G26800		Chr1	9391609	9393188	AT1G27045		Chr5	25269028	25272926	AT5G62960			Chr4	11089013	11093980	AT4G20670			Chr2	2579584	2584550	AT2G06500			Chr5	24672312	24673532	AT5G61370
	Chr1	12314904	12316258	AT1G33910		Chr1	13320657	13320875	AT1G06937		Chr1	9290870	9291301	AT1G26815		Chr1	9400326	9403905	AT1G27080		Chr5	25269028	25272926	AT5G62970			Chr2	7883644	7883994	AT2G18130			Chr1	12590345	12593927	AT1G34440			Chr4	18488566	18492084	AT4G39850
	Chr1	12303862	12305203	AT1G33880		Chr1	13320675	13322511	AT1G35830		Chr1	9291723	9292147	AT1G06027		Chr1	9412783	9417604	AT1G27110		Chr5	25098037	25099129	AT5G62520			Chr4	12044087	12045531	AT4G22980			Chr4	11820164	11826541	AT4G22410			Chr5	10369877	10374196	AT5G28450
	Chr1	12323474	12327311	AT1G33930		Chr1	13339804	13341228	AT1G35880		Chr1	9292446	9293862	AT1G26820		Chr1	9425280	9426897	AT1G27130		Chr5	25468635	25472338	AT5G63625			Chr4	16451921	16453963	AT4G34410			Chr5	996441	998166	AT5G03770			Chr5	3808781	3811736	AT5G11810
	Chr1	12319905	12320870	AT1G33920		Chr1	13339804	13341228	AT1G35880		Chr1	9312936	9315122	AT1G26870		Chr1	9427164	9427529	AT1G27135		Chr4	9840646	9843839	AT4G17680			Chr4	16451921	16453963	AT4G08985			Chr5	13199579	13200538	AT5G34883			Chr5	3808781	3811736	AT5G11820
	Chr1	12330576	12332785	AT1G33940		Chr1	13341300	13341953	AT1G35890		Chr1	9315305	9318277	AT1G26880		Chr1	9427804	9428914	AT1G27140		Chr5	16202268	16205320	AT5G40460			Chr4	16451921	16453963	AT4G34412			Chr1	19308560	19310654	AT1G51960			Chr3	8008475	8009443	AT3G22620
	Chr1	12332834	12340409	AT1G33950		Chr1	13346878	13354225	AT1G35895		Chr1	9317589	9319246	AT1G26890		Chr1	9432418	9433190	AT1G27160		Chr3	20968555	20970817	AT3G56600			Chr1	9853057	9855661	AT1G28210			Chr1	7131119	7134650	AT1G20590			Chr5	9100988	9102782	AT5G26040
	Chr1	12346138	12348733	AT1G33960		Chr1	13362962	13365172	AT1G35910		Chr1	9351160	9352833	AT1G26945		Chr1	9433393	9439417	AT1G27170		Chr4	14878066	14880468	AT4G30420			Chr1	5673863	5674930	AT1G16590			Chr1	7131119	7134650	AT1G20600			Chr1	28026049	28027822	AT1G74600
	Chr1	12332834	12340409	AT1G33950		Chr1	13454496	13456336	AT1G36060		Chr1	9355827	9357502	AT1G26960		Chr1	9463806	9465444	AT1G27220		Chr4	14878066	14880468	AT4G30430			Chr4	18063185	18065064	AT4G38650			Chr1	27454583	27455742	AT1G72970			Chr5	18569201	18572007	AT5G45780
	Chr1	12388595	12389447	AT1G34046		Chr1	13470980	13471202	AT1G06947		Chr1	9359325	9361833	AT1G26970		Chr1	9466237	9467076	AT1G27240		Chr2	18285233	18289244	AT2G44230			Chr5	8784789	8785832	AT5G25310			Chr1	30307898	30308465	AT1G80625			Chr4	1485586	1487981	AT4G03380
	Chr1	12390238	12390915	AT1G34047		Chr1	13471047	13471267	AT1G06953		Chr1	9363196	9363288	AT1G26973		Chr1	9468568	9469634	AT1G27250		Chr1	20141705	20144078	AT1G53935			Chr5	18417338	18421269	AT5G45460			Chr5	2515585	2516987	AT5G07880			Chr2	10863305	10865502	AT2G25530
	Chr1	12390448	12391149	AT1G34049		Chr1	13528257	13529470	AT1G36150		Chr1	9364471	9364570	AT1G26975		Chr1	9472077	9473149	AT1G27270		Chr1	20141705	20144078	AT1G53940			Chr4	9456257	9459403	AT4G16800			Chr5	752464	753375	AT5G03160			Chr4	1877579	1879722	AT4G03945
	Chr1	12393426	12396194	AT1G34050		Chr1	14158452	14161938	AT1G37130		Chr1	9364749	9365610	AT1G26976		Chr1	9473380	9473652	AT1G06063		Chr3	1098838	1100932	AT3G04181			Chr4	9456257	9459403	AT4G16807			Chr5	752464	753375	AT5G03170			Chr5	595463	599345	AT5G02650
	Chr1	12433356	12434735	AT1G34140		Chr1	14158452	14161938	AT1G37130		Chr1	9378404	9380790	AT1G27020		Chr1	9473380	9473719	AT1G06067		Chr3	1098838	1100932	AT3G01405			Chr1	4121391	4125687	AT1G12140			Chr3	17288538	17288858	AT3G46940			Chr4	439078	440818	AT4G01020
	Chr1	12514106	12516521	AT1G34315		Chr1	14170351	14172106	AT1G37140		Chr1	9381527	9384060	AT1G27030		Chr1	9474027	9474990	AT1G27280		Chr4	17349453	17350835	AT4G36830			Chr1	4121391	4125687	AT1G12150			Chr1	27871041	27871394	AT1G74120			Chr3	16876432	16878265	AT3G45910
	Chr1	12516112	12516555	AT1G34317		Chr1	15081952	15085893	AT1G40104		Chr1	9386693	9390042	AT1G27040		Chr1	9469948	9470967	AT1G27260		Chr1	4601416	4604013	AT1G13410			Chr1	4121391	4125687	AT1G04933			Chr5	26218421	26220072	AT5G65609			Chr5	22468613	22472661	AT5G55470
	Chr1	12591348	12593579	AT1G34440		Chr1	15603568	15607966	AT1G41830		Chr1	9391609	9393188	AT1G27045		Chr1	9537736	9539027	AT1G27461		Chr1	10543225	10547428	AT1G30050			Chr3	10747674	10749751	AT3G28680			Chr5	26218421	26220072	AT5G65610			Chr3	9942960	9945451	AT3G26950
	Chr1	12601014	12601360	AT1G06757		Chr1	15980135	15983571	AT1G42560		Chr1	9400326	9403905	AT1G27080		Chr1	9544410	9546285	AT1G27480		Chr1	10543225	10547428	AT1G30070			Chr3	7611074	7614564	AT3G21620			Chr4	485929	486468	AT4G01130			Chr3	9942960	9945451	AT3G26960
	Chr1	12602761	12603484	AT1G06763		Chr1	16127353	16129895	AT1G42970		Chr1	9412783	9417604	AT1G27110		Chr1	9546373	9547073	AT1G27490		Chr4	11150224	11152708	AT4G20820			Chr5	22382661	22383409	AT5G55150			Chr1	17260925	17265404	AT1G46696			Chr1	1440669	1444427	AT1G05030
	Chr1	12602898	12603141	AT1G06773		Chr1	16131687	16132318	AT1G07143		Chr1	9425280	9426897	AT1G27130		Chr1	9568813	9569330	AT1G27550		Chr5	7826152	7830250	AT5G23240			Chr1	17303037	17306168	AT1G47220			Chr3	19533875	19534180	AT3G52700			Chr5	5280018	5280849	AT5G16180
	Chr1	12595110	12602379	AT1G34460		Chr1	16133286	16135587	AT1G42980		Chr1	9427164	9427529	AT1G27135		Chr1	9570397	9570962	AT1G27555		Chr1	29538122	29540839	AT1G78520			Chr2	14370048	14373719	AT2G34020			Chr5	1999177	2000321	AT5G06540			Chr2	9228561	9229208	AT2G21550
	Chr1	12607222	12609084	AT1G34480		Chr1	16151095	16152240	AT1G43005		Chr1	9427804	9428914	AT1G27140		Chr1	9589675	9589914	AT1G06103		Chr1	29538122	29540839	AT1G78530			Chr3	17570882	17574259	AT3G47660			Chr4	6460802	6462129	AT4G10440			Chr2	2346838	2349820	AT2G06025
	Chr1	12609440	12610495	AT1G34490		Chr1	16153609	16154468	AT1G43010		Chr1	9432418	9433190	AT1G27160		Chr1	9589807	9591075	AT1G27580		Chr5	21936577	21938243	AT5G54060			Chr4	16639631	16641874	AT4G34940			Chr5	9038976	9042543	AT5G25910			Chr3	19218763	19220406	AT3G51820
	Chr1	12611638	12612663	AT1G34500		Chr1	16155278	16157950	AT1G43020		Chr1	9433393	9439417	AT1G27170		Chr1	9589807	9591075	AT1G27580		Chr5	4809980	4811066	AT5G14870			Chr2	12615904	12617820	AT2G29410			Chr5	25869425	25872768	AT5G64710			Chr3	474639	476587	AT3G02330
	Chr1	12615690	12617032	AT1G34510		Chr1	16232415	16232773	AT1G07147		Chr1	9433393	9439417	AT1G27170		Chr1	9606968	9607996	AT1G27610		Chr4	8420280	8423928	AT4G14695			Chr5	3171521	3172421	AT5G10130			Chr5	198993	199293	AT5G01500			Chr1	5933967	5935955	AT1G17340
	Chr1	12623434	12624508	AT1G34520		Chr1	16232785	16236109	AT1G43140		Chr1	9439653	9446223	AT1G27180		Chr1	9608153	9610566	AT1G27620		Chr4	8420280	8423928	AT4G14700			Chr1	6574487	6579117	AT1G19040			Chr1	20996021	21000477	AT1G56130			Chr1	812837	815397	AT1G03310
	Chr1	12637054	12638692	AT1G34540		Chr1	16269075	16270513	AT1G43171		Chr1	9463806	9465444	AT1G27220		Chr1	9614463	9614906	AT1G27640		Chr4	8420280	8423928	AT4G06210			Chr1	6574487	6579117	AT1G19050			Chr4	8588653	8593389	AT4G15050			Chr1	10762804	10764298	AT1G30450
	Chr1	12657027	12658756	AT1G34575		Chr1	16436250	16437755	AT1G43630		Chr1	9466237	9467076	AT1G27240		Chr1	9614551	9616574	AT1G27650		Chr1	20781672	20783912	AT1G55610			Chr4	13236464	13238736	AT4G26120			Chr4	8588653	8593389	AT4G15053			Chr5	301065	301974	AT5G01770
	Chr1	12660497	12663870	AT1G34580		Chr1	16439367	16441941	AT1G43640		Chr1	9468568	9469634	AT1G27250		Chr1	9621398	9626067	AT1G27660		Chr1	12651317	12654758	AT1G34560			Chr1	7534168	7534848	AT1G21520			Chr1	3424624	3428254	AT1G10417			Chr3	6336085	6338282	AT3G18480
	Chr1	12692995	12697834	AT1G34650		Chr1	16443582	16446918	AT1G43650		Chr1	9472077	9473149	AT1G27270		Chr1	9627533	9628749	AT1G27670		Chr1	12651317	12654758	AT1G34550			Chr2	9832725	9837056	AT2G23093			Chr2	14402662	14405908	AT2G34110			Chr4	8148128	8152176	AT4G14140
	Chr1	12709090	12710665	AT1G34670		Chr1	16443582	16446918	AT1G43650		Chr1	9473380	9473652	AT1G06063		Chr1	9654475	9656089	AT1G27740		Chr1	790147	792636	AT1G03230			Chr2	9832725	9837056	AT2G23096			Chr2	14402662	14405908	AT2G34100			Chr3	4230509	4234186	AT3G13160
	Chr1	12743722	12745748	AT1G34760		Chr1	16563811	16567399	AT1G43780		Chr1	9473380	9473719	AT1G06067		Chr1	9704558	9706238	AT1G27860		Chr5	24530390	24531441	AT5G60964			Chr4	8849538	8850438	AT4G15480			Chr3	21266864	21268839	AT3G57465			Chr3	4230509	4234186	AT3G13170
	Chr1	12763902	12765686	AT1G34790		Chr1	16575759	16576541	AT1G43790		Chr1	9474027	9474990	AT1G27280		Chr1	9706657	9707298	AT1G27870		Chr1	28069417	28070921	AT1G74710			Chr1	24272718	24277289	AT1G65350			Chr1	30287173	30287412	AT1G80555			Chr1	25483936	25484216	AT1G67960
	Chr1	12851983	12853235	AT1G35140		Chr1	16577521	16579722	AT1G43800		Chr1	9469948	9470967	AT1G27260		Chr1	9714136	9715176	AT1G27890		Chr4	433995	437495	AT4G01010			Chr1	1701412	1702697	AT1G05675			Chr2	18797525	18799458	AT2G00930			Chr1	576606	580343	AT1G02670
	Chr1	12870563	12872257	AT1G35170		Chr1	16739192	16741652	AT1G44050		Chr1	9537736	9539027	AT1G27461		Chr1	9733430	9738236	AT1G27940		Chr4	1273797	1274184	AT4G04305			Chr3	1471344	1475071	AT3G05190			Chr4	420380	421639	AT4G00970			Chr4	16441332	16442775	AT4G34390
	Chr1	12877107	12878835	AT1G35180		Chr1	16753944	16755670	AT1G44080		Chr1	9544410	9546285	AT1G27480		Chr1	9740508	9742159	AT1G27950		Chr5	25923799	25924932	AT5G00710			Chr5	17122146	17125266	AT5G42700			Chr2	18165581	18166866	AT2G43865			Chr4	2961323	2965060	AT4G05612
	Chr1	12882654	12884762	AT1G35183		Chr1	16755832	16756032	AT1G07237		Chr1	9546373	9547073	AT1G27490		Chr1	9752742	9753952	AT1G27990		Chr3	4572231	4574360	AT3G13880			Chr4	16810588	16811961	AT4G35350			Chr2	18165581	18166866	AT2G43870			Chr2	10620925	10624740	AT2G24980
	Chr1	12896582	12897675	AT1G35210		Chr1	16758110	16758508	AT1G44085		Chr1	9568813	9569330	AT1G27550		Chr1	9756674	9757963	AT1G28000		Chr4	6549001	6552364	AT4G10603			Chr1	3187533	3187993	AT1G09812			Chr3	10732769	10733530	AT3G28640			Chr4	6917641	6920129	AT4G11373
	Chr1	12907870	12908342	AT1G06827		Chr1	16760616	16762486	AT1G44090		Chr1	9570397	9570962	AT1G27555		Chr1	9756927	9757891	AT1G28005		Chr3	20440570	20442621	AT3G55150			Chr3	22379905	22380085	AT3G60550			Chr1	22275102	22279170	AT1G60460			Chr2	12242548	12245928	AT2G28580
	Chr1	12917070	12917829	AT1G35230		Chr1	16794820	16796450	AT1G44160		Chr1	9589675	9589914	AT1G06103		Chr1	9768889	9771157	AT1G28020		Chr3	18192680	18193203	AT3G49070			Chr5	10776056	10780153	AT5G28720			Chr1	29088012	29092274	AT1G77410			Chr2	9574170	9577322	AT2G22530
	Chr1	12921893	12922566	AT1G09205		Chr1	16811345	16811569	AT1G07247		Chr1	9589807	9591075	AT1G27580		Chr1	9771793	9773389	AT1G28030		Chr1	7168307	7171483	AT1G20680			Chr5	10776056	10780153	AT5G28730			Chr5	23068916	23069746	AT5G57010			Chr3	7495076	7496250	AT3G21300
	Chr1	12932024	12934656	AT1G35250		Chr1	16811377	16811940	AT1G07253		Chr1	9589807	9591075	AT1G27580		Chr1	9773580	9775481	AT1G28040		Chr5	17926035	17927159	AT5G44495			Chr5	23994269	23995763	AT5G59530			Chr1	22086310	22087732	AT1G59980			Chr4	9708711	9713372	AT4G17380
	Chr1	12935647	12936586	AT1G35255		Chr1	16812746	16812944	AT1G07257		Chr1	9606968	9607996	AT1G27610		Chr1	9763211	9768113	AT1G28010		Chr4	5604373	5607331	AT4G08780			Chr4	15209933	15211335	AT4G08465			Chr1	11821476	11822513	AT1G32690			Chr2	7324809	7328541	AT2G16900
	Chr1	12936849	12937787	AT1G35260		Chr1	16813599	16814733	AT1G44191		Chr1	9608153	9610566	AT1G27620		Chr1	9782847	9784091	AT1G28070		Chr4	16445215	16448208	AT4G34400			Chr5	19417268	19420628	AT5G47950			Chr5	19274962	19276911	AT5G47510			Chr2	11848483	11849396	AT2G27790
	Chr1	12939071	12939354	AT1G06853		Chr1	16817048	16817318	AT1G07263		Chr1	9621398	9626067	AT1G27660		Chr1	9789691	9791546	AT1G28080		Chr3	18709006	18713231	AT3G50420			Chr5	25268973	25273319	AT5G62960			Chr1	17082808	17083203	AT1G45160			Chr5	3393767	3396123	AT5G10740
	Chr1	12947517	12948849	AT1G35290		Chr1	16817810	16818214	AT1G07267		Chr1	9627533	9628749	AT1G27670		Chr1	9794544	9794763	AT1G06113		Chr3	18709006	18713231	AT3G50410			Chr5	25268973	25273319	AT5G62970			Chr1	4958861	4961727	AT1G14490			Chr1	21872217	21876221	AT1G59540
	Chr1	12956119	12957090	AT1G35310		Chr1	16807828	16810565	AT1G44180		Chr1	9654475	9656089	AT1G27740		Chr1	9825169	9828118	AT1G28130		Chr1	10496229	10497858	AT1G29962			Chr5	4490517	4495193	AT5G13940			Chr1	4958861	4961727	AT1G14500			Chr1	21339998	21341631	AT1G57613
	Chr1	12958841	12962853	AT1G35320		Chr1	16820929	16821823	AT1G44224		Chr1	9691628	9692560	AT1G27820		Chr1	9839316	9840124	AT1G28160		Chr3	19737965	19740552	AT3G53240			Chr4	18547172	18548261	AT4G40000			Chr1	19614323	19614831	AT1G52660			Chr5	3269301	3270959	AT5G10400
	Chr1	12964986	12966113	AT1G35330		Chr1	16831016	16834011	AT1G44318		Chr1	9704558	9706238	AT1G27860		Chr1	9841269	9842435	AT1G28170		Chr1	22560099	22563798	AT1G61200			Chr3	19648062	19649106	AT3G52990			Chr5	6521582	6523782	AT5G19360			Chr3	9104023	9104913	AT3G24929
	Chr1	12958841	12962853	AT1G35320		Chr1	16834210	16838562	AT1G44350		Chr1	9706657	9707298	AT1G27870		Chr1	9843023	9844561	AT1G28180		Chr4	16639613	16641833	AT4G34940			Chr4	48173	53408	AT4G00140			Chr2	6813132	6816841	AT2G15630			Chr1	28085841	28087494	AT1G74750
	Chr1	12980689	12984740	AT1G35350		Chr1	16852341	16853238	AT1G44478		Chr1	9698298	9703944	AT1G27850		Chr1	9846747	9848015	AT1G28190		Chr4	11348678	11351661	AT4G21326			Chr3	6419785	6421969	AT3G18660			Chr1	5389608	5390628	AT1G15670			Chr5	17383856	17385426	AT5G43310
	Chr1	12988649	12989373	AT1G35353		Chr1	16864831	16866787	AT1G44542		Chr1	9714136	9715176	AT1G27890		Chr1	9860291	9861568	AT1G28220		Chr4	11348678	11351661	AT4G21330			Chr1	7217189	7220372	AT1G20780			Chr3	5427849	5430647	AT3G15990			Chr2	6277500	6280238	AT2G14680
	Chr1	12991392	12992145	AT1G35365		Chr1	16875092	16876549	AT1G44608		Chr1	9733430	9738236	AT1G27940		Chr1	9862041	9864779	AT1G28230		Chr2	15973020	15974187	AT2G38120			Chr4	12093412	12096716	AT4G23080			Chr5	6499137	6504827	AT5G19310			Chr1	22965312	22968993	AT1G62130
	Chr1	13032806	13033280	AT1G35435		Chr1	16887217	16889155	AT1G44740		Chr1	9740508	9742159	AT1G27950		Chr1	9882951	9884189	AT1G28270		Chr2	19109683	19110274	AT2G46535			Chr5	2112826	2116714	AT5G06820			Chr1	12507863	12514970	AT1G34310			Chr5	9937192	9940440	AT5G00490
	Chr1	13035294	13036037	AT1G35440		Chr1	16913994	16917053	AT1G44800		Chr1	9752742	9753952	AT1G27990		Chr1	9889101	9891015	AT1G28290		Chr1	23492883	23494383	AT1G63340			Chr1	20142086	20143827	AT1G53935			Chr3	10139336	10139586	AT3G05235			Chr2	7534774	7538709	AT2G17320
	Chr1	13061549	13063455	AT1G35490		Chr1	16933699	16934568	AT1G44830		Chr1	9756674	9757963	AT1G28000		Chr1	9896867	9899876	AT1G28300		Chr4	9457299	9459427	AT4G16807			Chr1	20142086	20143827	AT1G53940			Chr5	24868084	24872706	AT5G61940			Chr1	5627030	5628910	AT1G16480
	Chr1	13108634	13111700	AT1G35540		Chr1	16965181	16965586	AT1G44895		Chr1	9756927	9757891	AT1G28005		Chr1	9904710	9905516	AT1G28305		Chr1	10987391	10989650	AT1G30860			Chr1	5726775	5727359	AT1G16730			Chr3	8929836	8933664	AT3G24510			Chr4	13354811	13358005	AT4G26430
	Chr1	13110517	13112832	AT1G35545		Chr1	16992570	16992951	AT1G07273		Chr1	9768889	9771157	AT1G28020		Chr1	9906882	9907725	AT1G28306		Chr3	21266215	21268928	AT3G57465			Chr5	23299530	23303597	AT5G57530			Chr5	2204445	2206514	AT5G07100			Chr1	28926389	28927172	AT1G76980
	Chr1	13112506	13113136	AT1G35550		Chr1	16992748	16992951	AT1G07277		Chr1	9771793	9773389	AT1G28030		Chr1	9912203	9913837	AT1G28310		Chr2	13916409	13918889	AT2G32800			Chr5	25613347	25615744	AT5G63990			Chr5	2204445	2206514	AT5G07110			Chr1	2156572	2158172	AT1G07025
	Chr1	13158466	13160284	AT1G35625		Chr1	16993891	16994045	AT1G07283		Chr1	9773580	9775481	AT1G28040		Chr1	9931934	9933451	AT1G28327		Chr1	576492	580435	AT1G02670			Chr3	1579599	1582597	AT3G05470			Chr1	5212996	5216759	AT1G15150			Chr5	13871364	13872494	AT5G35698
	Chr1	13162966	13164512	AT1G35630		Chr1	16994155	16995044	AT1G44940		Chr1	9763211	9768113	AT1G28010		Chr1	9951762	9953105	AT1G28360		Chr5	26430267	26431059	AT5G66110			Chr5	21636475	21638292	AT5G53320			Chr1	5212996	5216759	AT1G15160			Chr5	15945861	15947404	AT5G39840
	Chr1	13167733	13168082	AT1G06917		Chr1	16995113	16995295	AT1G44941		Chr1	9782847	9784091	AT1G28070		Chr1	9955774	9956980	AT1G28370		Chr1	2949815	2952564	AT1G09155			Chr3	1012105	1013740	AT3G03930			Chr2	3466654	3469493	AT2G07732			Chr2	17672011	17674900	AT2G42450
	Chr1	13220471	13224681	AT1G35710		Chr1	17002089	17003867	AT1G44970		Chr1	9789691	9791546	AT1G28080		Chr1	9961055	9961745	AT1G28375		Chr1	2949815	2952564	AT1G09157			Chr4	9701408	9703149	AT4G17350			Chr1	19741226	19742018	AT1G52990			Chr5	9839676	9844327	AT5G27790
	Chr1	13227137	13229931	AT1G35730		Chr1	17013385	17015520	AT1G45010		Chr1	9794544	9794763	AT1G06113		Chr1	9966186	9968495	AT1G28390		Chr5	21505426	21508098	AT5G53030			Chr1	8132470	8134357	AT1G22980			Chr5	241420	241745	AT5G01640			Chr5	9839676	9844327	AT5G27800
	Chr1	13253398	13255570	AT1G35750		Chr1	17033335	17035105	AT1G45063		Chr1	9825169	9828118	AT1G28130		Chr1	9967837	9968056	AT1G06153		Chr5	21505426	21508098	AT5G53040			Chr2	8083254	8085019	AT2G18640			Chr1	3142280	3147479	AT1G09710			Chr5	20701271	20703554	AT5G50890
	Chr1	13281163	13282042	AT1G09235		Chr1	17050631	17052189	AT1G45100		Chr1	9839316	9840124	AT1G28160		Chr1	9969246	9971681	AT1G28395		Chr5	3171479	3172417	AT5G10130			Chr1	2194897	2195707	AT1G07150			Chr1	3142280	3147479	AT1G09720			Chr3	23131558	23131958	AT3G62528
	Chr1	13314707	13314965	AT1G06933		Chr1	17074942	17076417	AT1G45145		Chr1	9841269	9842435	AT1G28170		Chr1	9972185	9973942	AT1G28400		Chr1	6398728	6399652	AT1G18590			Chr2	16848628	16850458	AT2G40340			Chr4	7881358	7886020	AT4G13570			Chr3	18616057	18617245	AT3G50210
	Chr1	13320657	13320875	AT1G06937		Chr1	17115762	17119246	AT1G45191		Chr1	9843023	9844561	AT1G28180		Chr1	9992661	9994656	AT1G28430		Chr1	8549314	8551759	AT1G24150			Chr4	12963393	12966565	AT4G25350			Chr4	7881358	7886020	AT4G13560			Chr1	16640560	16643250	AT1G07203
	Chr1	13320675	13322511	AT1G35830		Chr1	17115762	17119246	AT1G45191		Chr1	9846747	9848015	AT1G28190		Chr1	10003880	10004581	AT1G28450		Chr3	3510874	3513412	AT3G11210			Chr2	8418599	8422776	AT2G19440			Chr4	13370479	13371644	AT4G26470			Chr3	20915587	20917288	AT3G56408
	Chr1	13339804	13341228	AT1G35880		Chr1	17123785	17129223	AT1G45201		Chr1	9860291	9861568	AT1G28220		Chr1	10006230	10006778	AT1G28460		Chr5	22518179	22521040	AT5G55590			Chr2	7513227	7514835	AT2G17280			Chr3	21225609	21228356	AT3G57360			Chr3	20915587	20917288	AT3G56410
	Chr1	13339804	13341228	AT1G35880		Chr1	17123785	17129223	AT1G45201		Chr1	9862041	9864779	AT1G28230		Chr1	10012637	10013263	AT1G06163		Chr1	16776045	16779877	AT1G44110			Chr1	23734864	23735930	AT1G63950			Chr3	21225609	21228356	AT3G57370			Chr5	660138	665242	AT5G02880
	Chr1	13341300	13341953	AT1G35890		Chr1	17224720	17226541	AT1G46264		Chr1	9862041	9864779	AT1G28230		Chr1	10013434	10014256	AT1G28480		Chr1	26097791	26099088	AT1G69430			Chr1	16140585	16141574	AT1G43000			Chr1	30048899	30053394	AT1G79890			Chr5	9601714	9605286	AT5G27260
	Chr1	13346878	13354225	AT1G35895		Chr1	17232135	17232951	AT1G46408		Chr1	9882951	9884189	AT1G28270		Chr1	10010124	10012258	AT1G28470		Chr3	5484579	5485072	AT3G16180			Chr4	6567138	6567606	AT4G10630			Chr1	30048899	30053394	AT1G79900			Chr4	14432689	14434844	AT4G29300
	Chr1	13362962	13365172	AT1G35910		Chr1	17236524	17238185	AT1G46480		Chr1	9889101	9891015	AT1G28290		Chr1	10018691	10020479	AT1G28500		Chr5	23231243	23235480	AT5G57350			Chr5	9840177	9844342	AT5G27790			Chr5	26939310	26940933	AT5G67520			Chr1	16784437	16787248	AT1G44120
	Chr1	13454496	13456336	AT1G36060		Chr1	17270185	17271706	AT1G46840		Chr1	9896867	9899876	AT1G28300		Chr1	10041576	10044258	AT1G28570		Chr1	22356929	22359870	AT1G60720			Chr5	9840177	9844342	AT5G27800			Chr3	6078886	6081357	AT3G17760			Chr1	16784437	16787248	AT1G44125
	Chr1	13470980	13471202	AT1G06947		Chr1	17272521	17273629	AT1G46912		Chr1	9904710	9905516	AT1G28305		Chr1	10047276	10049343	AT1G28590		Chr1	22356929	22359870	AT1G60730			Chr1	17323790	17328999	AT1G47270			Chr3	6078886	6081357	AT3G17765			Chr3	21266506	21268859	AT3G57465
	Chr1	13471047	13471267	AT1G06953		Chr1	17278482	17278759	AT1G07317		Chr1	9906882	9907725	AT1G28306		Chr1	10050957	10053218	AT1G28600		Chr2	17521877	17523655	AT2G41970			Chr4	10440327	10444109	AT4G19050			Chr1	22736616	22737346	AT1G61610			Chr3	17116898	17117644	AT3G46490
	Chr1	13528257	13529470	AT1G36150		Chr1	17339561	17340972	AT1G47300		Chr1	9912203	9913837	AT1G28310		Chr1	10053443	10055881	AT1G28610		Chr2	17521877	17523655	AT2G41980			Chr5	1871385	1873587	AT5G06180			Chr3	10155690	10160907	AT3G27460			Chr2	8233399	8234356	AT2G18980
	Chr1	13838401	13839087	AT1G06983		Chr1	17341893	17342151	AT1G07347		Chr1	9931934	9933451	AT1G28327		Chr1	10058456	10063460	AT1G28630		Chr2	19317336	19318882	AT2G47010			Chr1	9355996	9357275	AT1G26960			Chr3	10155690	10160907	AT3G27440			Chr4	9178808	9180177	AT4G16215
	Chr1	14158452	14161938	AT1G37130		Chr1	17347094	17347515	AT1G47317		Chr1	9951762	9953105	AT1G28360		Chr1	10067563	10069177	AT1G28640		Chr1	9425544	9428547	AT1G27130			Chr3	5542241	5545552	AT3G16340			Chr1	24437999	24438385	AT1G65710			Chr2	16803550	16804531	AT2G40230
	Chr1	14158452	14161938	AT1G37130		Chr1	17348023	17348579	AT1G07353		Chr1	9955774	9956980	AT1G28370		Chr1	10069365	10071108	AT1G28650		Chr1	9425544	9428547	AT1G27140			Chr4	10889923	10893273	AT4G20160			Chr5	24932968	24934403	AT5G62080			Chr1	23709969	23711900	AT1G63870
	Chr1	14170351	14172106	AT1G37140		Chr1	17358447	17360722	AT1G47350		Chr1	9961055	9961745	AT1G28375		Chr1	10071609	10073549	AT1G28660		Chr5	26787041	26790166	AT5G67120			Chr5	19221526	19224602	AT5G47380			Chr2	8348439	8352573	AT2G19240			Chr4	7160311	7164652	AT4G11920
	Chr1	15603568	15607966	AT1G41830		Chr1	17365898	17368703	AT1G47370		Chr1	9966186	9968495	AT1G28390		Chr1	10081871	10083122	AT1G28695		Chr4	15109037	15110174	AT4G31020			Chr4	16661600	16662333	AT4G34990			Chr3	10044229	10044896	AT3G27200			Chr3	18770076	18774262	AT3G50590
	Chr1	15980135	15983571	AT1G42560		Chr1	17378580	17379391	AT1G47389		Chr1	9967837	9968056	AT1G06153		Chr1	10083500	10085030	AT1G28700		Chr1	943923	946239	AT1G03770			Chr2	9443277	9444143	AT2G22200			Chr3	17693211	17697770	AT3G47950			Chr5	6498885	6501681	AT5G19310
	Chr1	16131687	16132318	AT1G07143		Chr1	17379544	17380656	AT1G47390		Chr1	9972185	9973942	AT1G28400		Chr1	10103081	10104883	AT1G28760		Chr1	27993508	27996748	AT1G74480			Chr1	2124459	2125806	AT1G06920			Chr2	8794561	8796912	AT2G20380			Chr1	12980145	12980981	AT1G35350
	Chr1	16133286	16135587	AT1G42980		Chr1	17385707	17386485	AT1G47400		Chr1	9992661	9994656	AT1G28430		Chr1	10112564	10114491	AT1G29000		Chr1	27993508	27996748	AT1G74490			Chr5	15580688	15582734	AT5G38920			Chr2	8794561	8796912	AT2G20390			Chr5	4982893	4984141	AT5G15340
	Chr1	16151095	16152240	AT1G43005		Chr1	17386795	17387008	AT1G07357		Chr1	10003880	10004581	AT1G28450		Chr1	10114912	10115749	AT1G29005		Chr2	19286984	19287488	AT2G46940			Chr1	4459234	4460068	AT1G13080			Chr2	600595	603512	AT2G02280			Chr3	22585592	22591379	AT3G61030
	Chr1	16153609	16154468	AT1G43010		Chr1	17388989	17389500	AT1G07367		Chr1	10006230	10006778	AT1G28460		Chr1	10117715	10119085	AT1G29010		Chr3	1732561	1735780	AT3G05820			Chr1	13345555	13350957	AT1G35895			Chr5	26462593	26465469	AT5G66230			Chr2	993232	994578	AT2G03270
	Chr1	16155278	16157950	AT1G43020		Chr1	17391515	17391924	AT1G09505		Chr1	10012637	10013263	AT1G06163		Chr1	10120300	10122973	AT1G29020		Chr2	14880082	14880584	AT2G35345			Chr1	12651355	12655238	AT1G34560			Chr5	14343277	14344752	AT5G36400			Chr1	17465584	17469300	AT1G47560
	Chr1	16232415	16232773	AT1G07147		Chr1	17392374	17393026	AT1G07373		Chr1	10013434	10014256	AT1G28480		Chr1	10124286	10127098	AT1G29025		Chr4	2543483	2547152	AT4G04972			Chr1	12651355	12655238	AT1G34550			Chr2	3478209	3478430	AT2G07787			Chr3	8673083	8675699	AT3G24000
	Chr1	16232785	16236109	AT1G43140		Chr1	17394072	17395673	AT1G47410		Chr1	10010124	10012258	AT1G28470		Chr1	10124286	10127098	AT1G29025		Chr4	2543483	2547152	AT4G04980			Chr5	6913623	6915611	AT5G20460			Chr2	3478209	3478430	AT2G07658			Chr4	144659	145345	AT4G00330
	Chr1	16263805	16264945	AT1G43160		Chr1	17382998	17383830	AT1G47395		Chr1	10018691	10020479	AT1G28500		Chr1	10136246	10139228	AT1G29050		Chr3	18815905	18817244	AT3G50660			Chr3	21988486	21989829	AT3G59510			Chr4	869242	871904	AT4G01990			Chr4	13769270	13770550	AT4G27585
	Chr1	16269075	16270513	AT1G43171		Chr1	17402636	17403214	AT1G47450		Chr1	10041576	10044258	AT1G28570		Chr1	10138284	10138715	AT1G06217		Chr1	21710170	21713594	AT1G58430			Chr1	20972009	20977454	AT1G56080			Chr4	5319580	5323012	AT4G08395			Chr1	2291486	2292670	AT1G07470
	Chr1	16436250	16437755	AT1G43630		Chr1	17417492	17419442	AT1G47480		Chr1	10047276	10049343	AT1G28590		Chr1	10157494	10158805	AT1G29080		Chr5	25613336	25615996	AT5G63990			Chr4	12256205	12256986	AT4G23493			Chr5	16310073	16310925	AT5G40760			Chr2	17285772	17289109	AT2G41460
	Chr1	16439367	16441941	AT1G43640		Chr1	17422432	17423071	AT1G47485		Chr1	10050957	10053218	AT1G28600		Chr1	10162795	10164452	AT1G29090		Chr5	26864468	26867473	AT5G67340			Chr5	835123	839549	AT5G03400			Chr3	7949267	7950738	AT3G22421			Chr5	17665492	17666684	AT5G43900
	Chr1	16443582	16446918	AT1G43650		Chr1	17428945	17429813	AT1G47495		Chr1	10053443	10055881	AT1G28610		Chr1	10168717	10169916	AT1G29100		Chr5	4663001	4664700	AT5G14470			Chr5	835123	839549	AT5G03390			Chr3	4688511	4689975	AT3G14140			Chr4	5368376	5369809	AT4G08450
	Chr1	16563811	16567399	AT1G43780		Chr1	17435525	17438490	AT1G47510		Chr1	10058456	10063460	AT1G28630		Chr1	10171683	10173071	AT1G29110		Chr3	23042489	23046055	AT3G62270			Chr4	16909836	16912005	AT4G35655			Chr1	5798870	5800693	AT1G16960			Chr1	28504803	28505130	AT1G75920
	Chr1	16575759	16576541	AT1G43790		Chr1	17455533	17456186	AT1G47540		Chr1	10067563	10069177	AT1G28640		Chr1	10178902	10180225	AT1G29140		Chr2	8326138	8330162	AT2G19190			Chr2	10565872	10566490	AT2G24780			Chr5	26594353	26598069	AT5G66630			Chr3	17263039	17264932	AT3G46870
	Chr1	16577521	16579722	AT1G43800		Chr1	17456987	17465195	AT1G47550		Chr1	10069365	10071108	AT1G28650		Chr1	10183390	10184512	AT1G29160		Chr3	21229798	21232532	AT3G57380			Chr3	618543	622826	AT3G02840			Chr5	26594353	26598069	AT5G66631			Chr1	3133909	3135932	AT1G09680
	Chr1	16580447	16580800	AT1G43810		Chr1	17491731	17494779	AT1G47600		Chr1	10071609	10073549	AT1G28660		Chr1	10198764	10200255	AT1G29179		Chr4	8618575	8623062	AT4G15093			Chr3	618543	622826	AT3G02850			Chr2	9043747	9044992	AT2G21080			Chr4	6711544	6713467	AT4G10950
	Chr1	16714622	16715564	AT1G44010		Chr1	17498909	17499156	AT1G07397		Chr1	10081871	10083122	AT1G28695		Chr1	10199628	10200962	AT1G29180		Chr4	8618575	8623062	AT4G15096			Chr4	13355297	13360803	AT4G26430			Chr5	23696674	23697417	AT5G58630			Chr1	26818079	26820329	AT1G71110
	Chr1	16739192	16741652	AT1G44050		Chr1	17499023	17499296	AT1G07407		Chr1	10083500	10085030	AT1G28700		Chr1	10202414	10203491	AT1G29195		Chr1	29063144	29066012	AT1G77330			Chr4	13355297	13360803	AT4G26440			Chr1	5866617	5867240	AT1G17150			Chr1	3140984	3144079	AT1G09710
	Chr1	16753944	16755670	AT1G44080		Chr1	17496657	17498152	AT1G47603		Chr1	10112564	10114491	AT1G29000		Chr1	10207577	10210622	AT1G29200		Chr5	5025768	5026563	AT5G15480			Chr2	12988537	12992727	AT2G30480			Chr1	2813455	2817384	AT1G08800			Chr1	11351510	11352683	AT1G31710
	Chr1	16755832	16756032	AT1G07237		Chr1	17504714	17506043	AT1G47610		Chr1	10114912	10115749	AT1G29005		Chr1	10214681	10216563	AT1G29230		Chr3	493105	494972	AT3G02410			Chr4	5438346	5439270	AT4G08545			Chr4	13051782	13053492	AT4G25560			Chr4	14503984	14505991	AT4G29560
	Chr1	16760616	16762486	AT1G44090		Chr1	17507893	17509731	AT1G47620		Chr1	10117715	10119085	AT1G29010		Chr1	10229808	10231384	AT1G29270		Chr3	19405562	19406367	AT3G52330			Chr5	21097704	21098365	AT5G51920			Chr4	14666145	14670384	AT4G29990			Chr4	877394	880735	AT4G02005
	Chr1	16811345	16811569	AT1G07247		Chr1	17525342	17526308	AT1G47655		Chr1	10120300	10122973	AT1G29020		Chr1	10236337	10237990	AT1G29280		Chr1	8829606	8833084	AT1G25180			Chr4	11640977	11643038	AT4G21940			Chr4	8836630	8837758	AT4G15440			Chr2	5009157	5013046	AT2G12405
	Chr1	16811377	16811940	AT1G07253		Chr1	17536625	17539719	AT1G47670		Chr1	10124286	10127098	AT1G29025		Chr1	10288129	10289666	AT1G29395		Chr4	2673598	2675912	AT4G05190			Chr5	9635806	9637401	AT5G27340			Chr3	2118243	2119840	AT3G06710			Chr2	15472763	15473101	AT2G36870
	Chr1	16812746	16812944	AT1G07257		Chr1	17563931	17565106	AT1G47730		Chr1	10127582	10128850	AT1G09055		Chr1	10335910	10337854	AT1G29570		Chr1	22333820	22336939	AT1G60630			Chr1	28837727	28841946	AT1G76820			Chr5	16988168	16992381	AT5G42490			Chr5	19599846	19600526	AT5G48370
	Chr1	16813599	16814733	AT1G44191		Chr1	17587902	17588487	AT1G09555		Chr1	10127673	10128207	AT1G06197		Chr1	10338443	10339146	AT1G29580		Chr4	18185389	18188336	AT4G39030			Chr1	23840585	23844526	AT1G64253			Chr1	28628158	28630590	AT1G76310			Chr1	8219918	8222723	AT1G23190
	Chr1	16817048	16817318	AT1G07263		Chr1	17588215	17588463	AT1G07417		Chr1	10127745	10128056	AT1G06203		Chr1	10343785	10346364	AT1G29600		Chr5	9482861	9484126	AT5G26950			Chr1	4959862	4961613	AT1G14500			Chr1	12222695	12223197	AT1G33720			Chr5	19274941	19276779	AT5G47510
	Chr1	16817810	16818214	AT1G07267		Chr1	17588366	17588726	AT1G07423		Chr1	10136246	10139228	AT1G29050		Chr1	10371675	10374005	AT1G29660		Chr5	9482861	9484126	AT5G26955			Chr2	19154457	19155433	AT2G46660			Chr1	20415866	20416660	AT1G54700			Chr1	3705181	3709460	AT1G11100
	Chr1	16820929	16821823	AT1G44224		Chr1	17590266	17591261	AT1G47770		Chr1	10157494	10158805	AT1G29080		Chr1	10375599	10377871	AT1G29670		Chr2	7503591	7507788	AT2G17260			Chr3	270435	272637	AT3G01750			Chr3	10073314	10076586	AT3G27270			Chr3	11480448	11481861	AT3G29645
	Chr1	16807828	16810565	AT1G44180		Chr1	17594683	17595353	AT1G47780		Chr1	10162795	10164452	AT1G29090		Chr1	10393659	10399873	AT1G29720		Chr3	21794342	21798330	AT3G58980			Chr4	875086	877234	AT4G02000			Chr5	16073940	16074662	AT5G40210			Chr3	11480448	11481861	AT3G05885
	Chr1	16831016	16834011	AT1G44318		Chr1	17595491	17595902	AT1G07443		Chr1	10168717	10169916	AT1G29100		Chr1	10454433	10455874	AT1G29860		Chr3	21794342	21798330	AT3G58990			Chr4	13169939	13172845	AT4G25940			Chr1	4451261	4452095	AT1G13050			Chr2	12989086	12993247	AT2G30480
	Chr1	16834210	16838562	AT1G44350		Chr1	17597898	17599099	AT1G47786		Chr1	10171683	10173071	AT1G29110		Chr1	10456902	10458782	AT1G29870		Chr2	18406096	18407045	AT2G44590			Chr3	8426140	8427117	AT3G04455			Chr3	20843948	20845404	AT3G56170			Chr1	7026902	7027718	AT1G20290
	Chr1	16834210	16838562	AT1G44350		Chr1	17600004	17601173	AT1G47790		Chr1	10178902	10180225	AT1G29140		Chr1	10502335	10503023	AT1G09075		Chr3	21628960	21632397	AT3G58480			Chr1	1059826	1064027	AT1G04100			Chr3	20843948	20845404	AT3G56180			Chr5	1455704	1457686	AT5G04940
	Chr1	16847684	16848343	AT1G44414		Chr1	17601513	17602676	AT1G47800		Chr1	10183390	10184512	AT1G29160		Chr1	10537457	10540044	AT1G30040		Chr5	614794	615767	AT5G02720			Chr1	1059826	1064027	AT1G04110			Chr3	9499592	9501837	AT3G25970			Chr1	4670034	4673035	AT1G13630
	Chr1	16852341	16853238	AT1G44478		Chr1	17603504	17604559	AT1G47810		Chr1	10198764	10200255	AT1G29179		Chr1	10543022	10544594	AT1G30050		Chr5	614794	615767	AT5G02730			Chr1	2550724	2553246	AT1G08135			Chr5	15270973	15273042	AT5G38220			Chr1	3237258	3239366	AT1G09940
	Chr1	16864831	16866787	AT1G44542		Chr1	17604718	17605176	AT1G07447		Chr1	10199628	10200962	AT1G29180		Chr1	10550855	10553295	AT1G30080		Chr1	23509973	23510376	AT1G63410			Chr1	2550724	2553246	AT1G08140			Chr5	22468262	22472691	AT5G55470			Chr1	6260065	6261426	AT1G18190
	Chr1	16875092	16876549	AT1G44608		Chr1	17606558	17606818	AT1G47813		Chr1	10202414	10203491	AT1G29195		Chr1	10571310	10573365	AT1G30100		Chr1	1596196	1598876	AT1G05440			Chr5	23696720	23697367	AT5G58630			Chr4	13448698	13451950	AT4G26660			Chr2	9625989	9628756	AT2G22650
	Chr1	16887217	16889155	AT1G44740		Chr1	17616051	17619011	AT1G47840		Chr1	10207577	10210622	AT1G29200		Chr1	10596352	10597341	AT1G30135		Chr3	2752974	2754486	AT3G09020			Chr4	15012729	15017024	AT4G30830			Chr5	19888931	19892664	AT5G49070			Chr2	9625989	9628756	AT2G22660
	Chr1	16913994	16917053	AT1G44800		Chr1	17642397	17642805	AT1G47885		Chr1	10213788	10214349	AT1G09065		Chr1	10598542	10599696	AT1G30140		Chr2	12664034	12666080	AT2G29620			Chr5	19281465	19282926	AT5G47530			Chr4	1593930	1603061	AT4G03580			Chr5	5722422	5724669	AT5G17370
	Chr1	16933699	16934568	AT1G44830		Chr1	17643976	17647107	AT1G47890		Chr1	10214681	10216563	AT1G29230		Chr1	10606159	10607944	AT1G30160		Chr2	7566440	7570558	AT2G17430			Chr1	8195988	8198047	AT1G23100			Chr4	1593930	1603061	AT4G03590			Chr3	4364546	4365983	AT3G13420
	Chr1	16965181	16965586	AT1G44895		Chr1	17660752	17661058	AT1G47915		Chr1	10229808	10231384	AT1G29270		Chr1	10607888	10609618	AT1G30170		Chr5	16848872	16849567	AT5G42170			Chr1	8195988	8198047	AT1G23110			Chr5	2424022	2429264	AT5G07660			Chr5	24847384	24850134	AT5G61865
	Chr1	16992570	16992951	AT1G07273		Chr1	17661095	17662455	AT1G47920		Chr1	10236337	10237990	AT1G29280		Chr1	10618893	10620067	AT1G30190		Chr5	16716125	16717714	AT5G41765			Chr1	8195988	8198047	AT1G05787			Chr3	23156791	23158367	AT3G09835			Chr2	9047836	9048498	AT2G21100
	Chr1	16992748	16992951	AT1G07277		Chr1	17691811	17693887	AT1G47980		Chr1	10244453	10245874	AT1G29290		Chr1	10632720	10635581	AT1G30220		Chr2	14468645	14471126	AT2G34270			Chr4	18478912	18480481	AT4G39830			Chr5	22231315	22232034	AT5G54720			Chr1	19861133	19864319	AT1G53270
	Chr1	16993891	16994045	AT1G07283		Chr1	17698598	17701041	AT1G47990		Chr1	10288129	10289666	AT1G29395		Chr1	10646842	10647650	AT1G30250		Chr2	14468645	14471126	AT2G34280			Chr3	2167684	2168784	AT3G06868			Chr2	16943841	16944599	AT2G40580			Chr5	774448	776735	AT5G03250
	Chr1	16994155	16995044	AT1G44940		Chr1	17698598	17701041	AT1G47990		Chr1	10335910	10337854	AT1G29570		Chr1	10662608	10664668	AT1G30280		Chr4	14398071	14400619	AT4G29200			Chr3	2167684	2168784	AT3G06870			Chr5	24335756	24336225	AT5G60530			Chr1	4598991	4599187	AT1G13400
	Chr1	16995113	16995295	AT1G44941		Chr1	17704132	17706460	AT1G48000		Chr1	10338443	10339146	AT1G29580		Chr1	10663332	10664763	AT1G30282		Chr4	17821476	17824567	AT4G37900			Chr1	24525402	24529084	AT1G65920			Chr1	22661196	22663860	AT1G61420			Chr4	12829699	12833325	AT4G24970
	Chr1	17013385	17015520	AT1G45010		Chr1	17728095	17729102	AT1G48060		Chr1	10343785	10346364	AT1G29600		Chr1	10680079	10683137	AT1G30320		Chr4	8148090	8152127	AT4G14140			Chr3	21997092	22000455	AT3G59550			Chr1	22661196	22663860	AT1G08387			Chr4	11216450	11217310	AT4G20980
	Chr1	17050631	17052189	AT1G45100		Chr1	17730417	17731157	AT1G48070		Chr1	10371675	10374005	AT1G29660		Chr1	10709999	10711667	AT1G30350		Chr1	8894478	8896827	AT1G25360			Chr5	17473881	17474597	AT5G43510			Chr4	13579649	13581415	AT4G07765			Chr2	9723426	9726929	AT2G22830
	Chr1	17074942	17076417	AT1G45145		Chr1	17762752	17763126	AT1G09565		Chr1	10375599	10377871	AT1G29670		Chr1	10769722	10770775	AT1G30455		Chr5	24812170	24813864	AT5G61740			Chr2	12582507	12584714	AT2G29260			Chr3	5530284	5534652	AT3G16320			Chr5	640962	641920	AT5G02810
	Chr1	17093278	17093560	AT1G07297		Chr1	17762830	17763370	AT1G07467		Chr1	10393659	10399873	AT1G29720		Chr1	10786979	10788683	AT1G30473		Chr5	24812170	24813864	AT5G61750			Chr2	7282186	7283625	AT2G16780			Chr2	238165	239162	AT2G04005			Chr3	3216466	3216771	AT3G10370
	Chr1	17115762	17119246	AT1G45191		Chr1	17780429	17781727	AT1G48130		Chr1	10454433	10455874	AT1G29860		Chr1	10814612	10816615	AT1G30530		Chr3	19764960	19769092	AT3G53310			Chr1	5735486	5738743	AT1G16770			Chr1	18718925	18723819	AT1G50520			Chr4	6952909	6955873	AT4G11430
	Chr1	17115762	17119246	AT1G45191		Chr1	17794560	17795163	AT1G48190		Chr1	10456902	10458782	AT1G29870		Chr1	10868218	10871297	AT1G30650		Chr3	18932418	18935273	AT3G50940			Chr1	5735486	5738743	AT1G16760			Chr1	5225943	5227911	AT1G15190			Chr3	9142052	9144746	AT3G25100
	Chr1	17123785	17129223	AT1G45201		Chr1	17792343	17794460	AT1G48180		Chr1	10502335	10503023	AT1G09075		Chr1	10879173	10880188	AT1G30670		Chr4	1388014	1391171	AT4G03130			Chr3	3638311	3639190	AT3G11550			Chr1	5225943	5227911	AT1G15180			Chr5	24873518	24875182	AT5G61950
	Chr1	17224720	17226541	AT1G46264		Chr1	17857258	17857722	AT1G48325		Chr1	10537457	10540044	AT1G30040		Chr1	10876724	10879143	AT1G30660		Chr1	17302528	17306402	AT1G47220			Chr5	9482741	9484121	AT5G26950			Chr2	12734228	12736485	AT2G29850			Chr1	13032205	13033157	AT1G35435
	Chr1	17230411	17230653	AT1G46336		Chr1	17881968	17883967	AT1G48400		Chr1	10543022	10544594	AT1G30050		Chr1	10887607	10890407	AT1G30690		Chr4	14255721	14257700	AT4G28890			Chr5	9482741	9484121	AT5G26955			Chr2	7485530	7487500	AT2G17210			Chr5	16073895	16074593	AT5G40210
	Chr1	17232135	17232951	AT1G46408		Chr1	17884645	17885614	AT1G48405		Chr1	10550855	10553295	AT1G30080		Chr1	10892445	10894714	AT1G30700		Chr4	15383307	15387054	AT4G31805			Chr5	14363173	14364486	AT5G36490			Chr1	19725339	19730111	AT1G52950			Chr3	1273503	1275021	AT3G04690
	Chr1	17233552	17234237	AT1G09495		Chr1	17913711	17916101	AT1G48470		Chr1	10571310	10573365	AT1G30100		Chr1	10897925	10899975	AT1G30720		Chr4	15383307	15387054	AT4G31800			Chr3	916499	918270	AT3G03702			Chr3	22001669	22005924	AT3G59570			Chr2	1885616	1890603	AT2G00420
	Chr1	17236524	17238185	AT1G46480		Chr1	17931390	17934662	AT1G48500		Chr1	10596352	10597341	AT1G30135		Chr1	10895252	10897127	AT1G30710		Chr5	10210099	10211889	AT5G28237			Chr3	916499	918270	AT3G03700			Chr1	23710114	23711932	AT1G63870			Chr2	8366392	8368250	AT2G19290
	Chr1	17270185	17271706	AT1G46840		Chr1	17934746	17936946	AT1G48510		Chr1	10598542	10599696	AT1G30140		Chr1	10900681	10902626	AT1G30730		Chr5	16171478	16173696	AT5G40410			Chr5	14522517	14525696	AT5G36870			Chr4	8859829	8860318	AT4G06330			Chr5	24270662	24273756	AT5G60320
	Chr1	17272521	17273629	AT1G46912		Chr1	17943242	17944315	AT1G48530		Chr1	10606159	10607944	AT1G30160		Chr1	10902995	10904739	AT1G30740		Chr4	13411646	13413398	AT4G26580			Chr3	16839785	16840524	AT3G45820			Chr4	11998948	12004301	AT4G22860			Chr5	24270662	24273756	AT5G60335
	Chr1	17278482	17278759	AT1G07317		Chr1	17957942	17960916	AT1G48580		Chr1	10607888	10609618	AT1G30170		Chr1	10918267	10920709	AT1G30760		Chr1	29282404	29286096	AT1G77860			Chr4	1040	4672	AT4G00020			Chr1	21373624	21374905	AT1G57700			Chr3	1121797	1122443	AT3G04250
	Chr1	17339561	17340972	AT1G47300		Chr1	17962520	17964465	AT1G48590		Chr1	10618893	10620067	AT1G30190		Chr1	10921835	10922072	AT1G06353		Chr1	29282404	29286096	AT1G77870			Chr5	21143241	21145352	AT5G00650			Chr1	29620467	29622535	AT1G78770			Chr3	21911683	21914222	AT3G59290
	Chr1	17341893	17342151	AT1G07347		Chr1	17964762	17964989	AT1G07497		Chr1	10627185	10630630	AT1G30210		Chr1	10923919	10926561	AT1G30780		Chr4	8663130	8666126	AT4G15200			Chr5	21276024	21279282	AT5G52410			Chr1	29620467	29622535	AT1G78780			Chr4	12560728	12562801	AT4G24204
	Chr1	17347094	17347515	AT1G47317		Chr1	17986303	17989163	AT1G48640		Chr1	10632720	10635581	AT1G30220		Chr1	10928659	10928968	AT1G06363		Chr3	5325492	5327802	AT3G15720			Chr5	4828880	4829994	AT5G14930			Chr1	18547877	18548639	AT1G50050			Chr5	25894128	25896394	AT5G64760
	Chr1	17348023	17348579	AT1G07353		Chr1	17995785	17998037	AT1G48660		Chr1	10646842	10647650	AT1G30250		Chr1	10928005	10928930	AT1G06357		Chr1	653843	654370	AT1G02900			Chr5	1785883	1788294	AT5G05940			Chr5	19593208	19594293	AT5G48350			Chr4	8461581	8464062	AT4G14746
	Chr1	17358447	17360722	AT1G47350		Chr1	17998795	18001289	AT1G48670		Chr1	10662608	10664668	AT1G30280		Chr1	10932713	10934066	AT1G30790		Chr3	16141702	16144243	AT3G44550			Chr3	19127437	19130521	AT3G51570			Chr4	12561320	12562674	AT4G24204			Chr3	4165320	4169396	AT3G13020
	Chr1	17365898	17368703	AT1G47370		Chr1	17998795	18001289	AT1G48670		Chr1	10663332	10664763	AT1G30282		Chr1	10935684	10936396	AT1G30795		Chr5	17920240	17923627	AT5G44480			Chr1	3979822	3980934	AT1G11785			Chr1	12898533	12908452	AT1G35215			Chr4	17821804	17824596	AT4G37900
	Chr1	17378580	17379391	AT1G47389		Chr1	18008813	18010086	AT1G48690		Chr1	10680079	10683137	AT1G30320		Chr1	10936765	10942292	AT1G30810		Chr4	8705847	8707734	AT4G15242			Chr1	7106193	7109702	AT1G20515			Chr4	13921681	13923251	AT4G27980			Chr1	835920	838059	AT1G03380
	Chr1	17379544	17380656	AT1G47390		Chr1	18010497	18012888	AT1G48698		Chr1	10709999	10711667	AT1G30350		Chr1	10936923	10938099	AT1G30800		Chr4	8705847	8707734	AT4G15245			Chr1	7106193	7109702	AT1G20530			Chr2	7956127	7956341	AT2G18320			Chr1	4014894	4015161	AT1G11905
	Chr1	17385707	17386485	AT1G47400		Chr1	18011035	18013257	AT1G48700		Chr1	10719065	10720843	AT1G30370		Chr1	10942648	10944727	AT1G30814		Chr1	1661060	1664043	AT1G05575			Chr4	11183650	11185974	AT4G20890			Chr5	7340447	7341834	AT5G22140			Chr4	14142297	14142616	AT4G28640
	Chr1	17386795	17387008	AT1G07357		Chr1	18019274	18020642	AT1G48725		Chr1	10769722	10770775	AT1G30455		Chr1	10974383	10976298	AT1G30840		Chr1	1661060	1664043	AT1G05577			Chr4	11183650	11185974	AT4G20900			Chr5	7340447	7341834	AT5G22145			Chr5	4803912	4804932	AT5G14850
	Chr1	17388989	17389500	AT1G07367		Chr1	18020337	18022277	AT1G48730		Chr1	10786979	10788683	AT1G30473		Chr1	10985063	10986295	AT1G30850		Chr1	5079157	5082467	AT1G14750			Chr1	27684686	27685285	AT1G73630			Chr1	25130555	25132200	AT1G67180			Chr5	7360581	7362357	AT5G22220
	Chr1	17391515	17391924	AT1G09505		Chr1	18023378	18026097	AT1G48740		Chr1	10814612	10816615	AT1G30530		Chr1	10986496	10989593	AT1G30860		Chr3	907571	910499	AT3G03680			Chr3	21532942	21534083	AT3G58150			Chr3	12128837	12137680	AT3G30520			Chr5	14931875	14933787	AT5G37590
	Chr1	17392374	17393026	AT1G07373		Chr1	18026811	18027031	AT1G48742		Chr1	10822161	10823903	AT1G30550		Chr1	10991478	10993083	AT1G30870		Chr1	11323146	11326159	AT1G31640			Chr3	22860605	22864184	AT3G61760			Chr3	4903143	4907463	AT3G14580			Chr5	14931875	14933787	AT5G37600
	Chr1	17394072	17395673	AT1G47410		Chr1	18049810	18053152	AT1G48800		Chr1	10824637	10826405	AT1G30560		Chr1	10996870	11000809	AT1G30900		Chr1	7927740	7931538	AT1G22460			Chr4	18582921	18584585	AT4G40100			Chr3	4903143	4907463	AT3G14590			Chr4	8836456	8837809	AT4G15440
	Chr1	17382998	17383830	AT1G47395		Chr1	18055229	18059521	AT1G48820		Chr1	10868218	10871297	AT1G30650		Chr1	11000862	11003226	AT1G30910		Chr1	28012774	28017271	AT1G74545			Chr3	18359599	18361680	AT3G49520			Chr1	4293085	4296112	AT1G12620			Chr1	5022940	5026421	AT1G14640
	Chr1	17417492	17419442	AT1G47480		Chr1	18055229	18059521	AT1G48820		Chr1	10879173	10880188	AT1G30670		Chr1	11004084	11005444	AT1G30920		Chr1	28012774	28017271	AT1G74540			Chr3	20968551	20971413	AT3G56600			Chr1	25489675	25490568	AT1G67990			Chr5	26432332	26435635	AT5G66120
	Chr1	17422432	17423071	AT1G47485		Chr1	18072123	18076405	AT1G48870		Chr1	10876724	10879143	AT1G30660		Chr1	11013511	11013942	AT1G06383		Chr1	28012774	28017271	AT1G74550			Chr5	19600098	19600463	AT5G48370			Chr4	5635431	5636888	AT4G08850			Chr5	26432332	26435635	AT5G66130
	Chr1	17435525	17438490	AT1G47510		Chr1	18091681	18093878	AT1G48910		Chr1	10892445	10894714	AT1G30700		Chr1	11014783	11015913	AT1G30930		Chr1	11102289	11104040	AT1G06407			Chr5	24303287	24307320	AT5G60440			Chr4	9721378	9721623	AT4G17410			Chr3	10038561	10042961	AT3G27190
	Chr1	17455533	17456186	AT1G47540		Chr1	18101643	18104768	AT1G48930		Chr1	10897925	10899975	AT1G30720		Chr1	11016492	11016886	AT1G06387		Chr1	11102289	11104040	AT1G31095			Chr4	700072	704275	AT4G01630			Chr3	10790918	10793688	AT3G28750			Chr5	16130809	16131304	AT5G40340
	Chr1	17456987	17465195	AT1G47550		Chr1	18118017	18120667	AT1G48980		Chr1	10895252	10897127	AT1G30710		Chr1	11009888	11012280	AT1G30925		Chr5	21117220	21117810	AT5G51990			Chr4	700072	704275	AT4G01640			Chr3	10790918	10793688	AT3G28760			Chr5	18050298	18054269	AT5G44740
	Chr1	17491731	17494779	AT1G47600		Chr1	18121434	18122155	AT1G48990		Chr1	10900681	10902626	AT1G30730		Chr1	11032358	11032898	AT1G06393		Chr5	835027	839621	AT5G03400			Chr2	10662211	10662950	AT2G25060			Chr5	8622721	8629451	AT5G25040			Chr5	18050298	18054269	AT5G44750
	Chr1	17498909	17499156	AT1G07397		Chr1	18128524	18131522	AT1G49005		Chr1	10902995	10904739	AT1G30740		Chr1	11032549	11033244	AT1G09095		Chr5	835027	839621	AT5G03390			Chr2	16216968	16220873	AT2G38800			Chr3	10231845	10235935	AT3G27640			Chr1	22541466	22543490	AT1G61150
	Chr1	17499023	17499296	AT1G07407		Chr1	18128524	18131522	AT1G49005		Chr1	10918267	10920709	AT1G30760		Chr1	11035992	11037508	AT1G30950		Chr5	3092782	3093588	AT5G09900			Chr2	16216968	16220873	AT2G38810			Chr1	6064599	6066894	AT1G17630			Chr2	13078610	13081184	AT2G30695
	Chr1	17504714	17506043	AT1G47610		Chr1	18136666	18138080	AT1G49030		Chr1	10921835	10922072	AT1G06353		Chr1	11051999	11053295	AT1G30990		Chr5	3092782	3093588	AT5G09910			Chr3	21397987	21402435	AT3G57770			Chr2	8037612	8040795	AT2G18530			Chr2	9401600	9403487	AT2G22122
	Chr1	17507893	17509731	AT1G47620		Chr1	18171563	18172450	AT1G49110		Chr1	10923919	10926561	AT1G30780		Chr1	11053377	11054567	AT1G31000		Chr1	29833909	29837335	AT1G79320			Chr3	21397987	21402435	AT3G57780			Chr1	19861144	19864632	AT1G53270			Chr4	9163238	9164563	AT4G16165
	Chr1	17496657	17498152	AT1G47603		Chr1	18173427	18174416	AT1G49120		Chr1	10928659	10928968	AT1G06363		Chr1	11054731	11056959	AT1G31010		Chr1	29833909	29837335	AT1G79310			Chr4	18029071	18031173	AT4G38560			Chr2	18673655	18676978	AT2G45290			Chr3	4572190	4574849	AT3G13880
	Chr1	17525342	17526308	AT1G47655		Chr1	18166128	18170105	AT1G49100		Chr1	10928005	10928930	AT1G06357		Chr1	11069510	11072564	AT1G31040		Chr5	21584068	21584886	AT5G53200			Chr4	10312458	10317069	AT4G18780			Chr4	9433089	9434373	AT4G16770			Chr5	401153	401483	AT5G02040
	Chr1	17536625	17539719	AT1G47670		Chr1	18190470	18190733	AT1G07533		Chr1	10932713	10934066	AT1G30790		Chr1	11075398	11079289	AT1G31050		Chr1	18178497	18182448	AT1G49160			Chr4	14136907	14138047	AT4G28620			Chr5	19900346	19905649	AT5G49110			Chr4	1269424	1271120	AT4G02860
	Chr1	17563931	17565106	AT1G47730		Chr1	18191267	18193782	AT1G49190		Chr1	10935684	10936396	AT1G30795		Chr1	11094407	11095649	AT1G31090		Chr2	12582511	12584798	AT2G29260			Chr2	9690200	9693896	AT2G22780			Chr1	12315222	12318201	AT1G33910			Chr3	23157131	23158229	AT3G09835
	Chr1	17587902	17588487	AT1G09555		Chr1	18201889	18202764	AT1G49210		Chr1	10936765	10942292	AT1G30810		Chr1	11091832	11092899	AT1G31080		Chr1	4189360	4190820	AT1G12320			Chr1	23559601	23561890	AT1G63520			Chr2	19545855	19550839	AT2G47680			Chr3	23157131	23158229	AT3G09845
	Chr1	17588215	17588463	AT1G07417		Chr1	18205934	18206701	AT1G49220		Chr1	10936923	10938099	AT1G30800		Chr1	11117941	11119785	AT1G31140		Chr2	11936189	11938171	AT2G28040			Chr1	26122208	26122839	AT1G69490			Chr3	23389739	23391470	AT3G63320			Chr1	7241010	7243701	AT1G20830
	Chr1	17588366	17588726	AT1G07423		Chr1	18206312	18211390	AT1G49225		Chr1	10942648	10944727	AT1G30814		Chr1	11128732	11130239	AT1G31163		Chr4	9033166	9034606	AT4G15920			Chr3	22393981	22394868	AT3G60580			Chr3	16526167	16529115	AT3G45140			Chr4	10526163	10529531	AT4G19240
	Chr1	17594683	17595353	AT1G47780		Chr1	18206312	18211390	AT1G49225		Chr1	10974383	10976298	AT1G30840		Chr1	11166557	11167547	AT1G31250		Chr3	6844140	6846012	AT3G19700			Chr3	6696384	6700701	AT3G19320			Chr1	12925276	12931946	AT1G35240			Chr1	7009638	7012374	AT1G20230
	Chr1	17595491	17595902	AT1G07443		Chr1	18209194	18210177	AT1G49230		Chr1	10981462	10981784	AT1G06377		Chr1	11169450	11170396	AT1G31255		Chr2	18939239	18940299	AT2G46050			Chr3	6696384	6700701	AT3G19330			Chr3	222203	225597	AT3G01580			Chr2	10217208	10219276	AT2G24010
	Chr1	17597898	17599099	AT1G47786		Chr1	18220533	18224325	AT1G49250		Chr1	10985063	10986295	AT1G30850		Chr1	11169645	11170059	AT1G06427		Chr1	2550938	2553093	AT1G08135			Chr5	1468655	1470623	AT5G04980			Chr1	3063495	3064273	AT1G09490			Chr2	10217208	10219276	AT2G24020
	Chr1	17600004	17601173	AT1G47790		Chr1	18222202	18222354	AT1G07537		Chr1	10986496	10989593	AT1G30860		Chr1	11175559	11177362	AT1G31260		Chr1	2550938	2553093	AT1G08140			Chr1	9733681	9738037	AT1G27940			Chr5	26439044	26442927	AT5G66150			Chr2	1167183	1168706	AT2G03821
	Chr1	17601513	17602676	AT1G47800		Chr1	18225870	18226967	AT1G49260		Chr1	10991478	10993083	AT1G30870		Chr1	11178349	11179203	AT1G31270		Chr3	3242766	3244541	AT3G10430			Chr5	22594663	22597299	AT5G55830			Chr3	20200606	20203520	AT3G54580			Chr3	8788907	8790851	AT3G24255
	Chr1	17603504	17604559	AT1G47810		Chr1	18227122	18230330	AT1G49270		Chr1	10996870	11000809	AT1G30900		Chr1	11188120	11192585	AT1G31290		Chr1	21691085	21692633	AT1G58390			Chr2	14006191	14008468	AT2G33000			Chr1	7766046	7766588	AT1G08955			Chr1	18662357	18663323	AT1G50380
	Chr1	17604718	17605176	AT1G07447		Chr1	18232407	18233680	AT1G49290		Chr1	11000862	11003226	AT1G30910		Chr1	11188120	11192585	AT1G31290		Chr3	18527110	18529572	AT3G49970			Chr4	7964051	7966198	AT4G13710			Chr3	10640277	10645992	AT3G28410			Chr1	19580258	19580606	AT1G52565
	Chr1	17606558	17606818	AT1G47813		Chr1	18237701	18238497	AT1G49310		Chr1	11004084	11005444	AT1G30920		Chr1	11198353	11200141	AT1G31310		Chr1	28126205	28128979	AT1G74870			Chr4	10875299	10878176	AT4G20110			Chr3	7234353	7236355	AT3G03985			Chr5	6866055	6870015	AT5G20320
	Chr1	17616051	17619011	AT1G47840		Chr1	18246305	18248088	AT1G49320		Chr1	11013511	11013942	AT1G06383		Chr1	11238298	11239363	AT1G31370		Chr5	24461350	24462568	AT5G60800			Chr1	6235045	6240010	AT1G18130			Chr4	12841457	12842473	AT4G07295			Chr3	4432388	4434504	AT3G13580
	Chr1	17642397	17642805	AT1G47885		Chr1	18249866	18251038	AT1G49330		Chr1	11014783	11015913	AT1G30930		Chr1	11240451	11241099	AT1G31380		Chr1	5896506	5899832	AT1G17240			Chr1	6235045	6240010	AT1G18140			Chr4	12841457	12842473	AT4G07300			Chr1	10249080	10249565	AT1G29300
	Chr1	17643976	17647107	AT1G47890		Chr1	18267231	18269465	AT1G49360		Chr1	11016492	11016886	AT1G06387		Chr1	11241229	11241474	AT1G06437		Chr5	1536191	1539258	AT5G05180			Chr5	14806683	14811892	AT5G37360			Chr5	14345481	14346970	AT5G36410			Chr2	18457392	18460876	AT2G44770
	Chr1	17660752	17661058	AT1G47915		Chr1	18290942	18295905	AT1G49430		Chr1	11009888	11012280	AT1G30925		Chr1	11243182	11244392	AT1G31390		Chr4	17221692	17225681	AT4G36490			Chr1	18953955	18954839	AT1G51170			Chr2	5774744	5775393	AT2G13820			Chr4	16398114	16398742	AT4G34260
	Chr1	17661095	17662455	AT1G47920		Chr1	18305445	18307557	AT1G49450		Chr1	11032358	11032898	AT1G06393		Chr1	11245225	11246561	AT1G31400		Chr2	11549343	11550438	AT2G00810			Chr5	1156167	1158613	AT5G04220			Chr4	12872447	12876617	AT4G25070			Chr5	20537662	20539628	AT5G50440
	Chr1	17691811	17693887	AT1G47980		Chr1	18310428	18311714	AT1G49470		Chr1	11032549	11033244	AT1G09095		Chr1	11259851	11261234	AT1G31450		Chr1	27963951	27965239	AT1G74400			Chr2	7390127	7394301	AT2G17010			Chr5	20742021	20744237	AT5G51000			Chr5	20023528	20027176	AT5G49390
	Chr1	17695289	17696075	AT1G07457		Chr1	18346958	18349049	AT1G49570		Chr1	11035992	11037508	AT1G30950		Chr1	11277417	11278462	AT1G31510		Chr3	9345066	9349422	AT3G25670			Chr2	7390127	7394301	AT2G17000			Chr3	18450841	18451163	AT3G49750			Chr3	22501819	22503935	AT3G60910
	Chr1	17698598	17701041	AT1G47990		Chr1	18424578	18426782	AT1G49770		Chr1	11051999	11053295	AT1G30990		Chr1	11278983	11279639	AT1G31520		Chr5	10029204	10030533	AT5G28030			Chr1	10985900	10989627	AT1G30860			Chr1	19430050	19430870	AT1G52185			Chr3	22501819	22503935	AT3G60920
	Chr1	17704132	17706460	AT1G48000		Chr1	18438012	18439115	AT1G49800		Chr1	11053377	11054567	AT1G31000		Chr1	11281188	11282468	AT1G31530		Chr4	18478636	18480513	AT4G39830			Chr3	2833435	2837879	AT3G09240			Chr1	19430050	19430870	AT1G07793			Chr5	19762582	19764185	AT5G48730
	Chr1	17723382	17727243	AT1G48050		Chr1	18439945	18442237	AT1G49810		Chr1	11054731	11056959	AT1G31010		Chr1	11288378	11293799	AT1G31540		Chr4	1402372	1402861	AT4G03175			Chr3	2833435	2837879	AT3G09230			Chr1	1619398	1622421	AT1G05490			Chr5	5111393	5114725	AT5G15685
	Chr1	17728095	17729102	AT1G48060		Chr1	18458526	18459969	AT1G49860		Chr1	11069510	11072564	AT1G31040		Chr1	11288378	11293799	AT1G31540		Chr2	16447063	16449188	AT2G39375			Chr5	4518039	4519448	AT5G14000			Chr2	7370997	7371176	AT2G16970			Chr1	6064543	6066242	AT1G17630
	Chr1	17730417	17731157	AT1G48070		Chr1	18473908	18477643	AT1G49900		Chr1	11075398	11079289	AT1G31050		Chr1	11295446	11297379	AT1G31550		Chr2	16447063	16449188	AT2G39380			Chr2	9171346	9173239	AT2G21420			Chr5	2752210	2752660	AT5G08505			Chr3	22860514	22864175	AT3G61760
	Chr1	17762752	17763126	AT1G09565		Chr1	18484932	18485639	AT1G49930		Chr1	11094407	11095649	AT1G31090		Chr1	11316941	11317894	AT1G31620		Chr3	21616800	21619125	AT3G58440			Chr2	9171346	9173239	AT2G21430			Chr2	726010	728094	AT2G02635			Chr2	424655	424944	AT2G01918
	Chr1	17762830	17763370	AT1G07467		Chr1	18486742	18488523	AT1G49938		Chr1	11091832	11092899	AT1G31080		Chr1	11318528	11319547	AT1G31630		Chr5	174947	176206	AT5G01420			Chr5	21055762	21056646	AT5G51810			Chr4	18028919	18031143	AT4G38560			Chr1	28095889	28096936	AT1G74780
	Chr1	17760142	17761998	AT1G48095		Chr1	18488127	18491769	AT1G49940		Chr1	11117941	11119785	AT1G31140		Chr1	11337536	11341889	AT1G31670		Chr1	5612213	5613868	AT1G16420			Chr4	10257115	10258497	AT4G18630			Chr1	679321	681162	AT1G02980			Chr5	22732079	22734122	AT5G56160
	Chr1	17780429	17781727	AT1G48130		Chr1	18498639	18501886	AT1G49960		Chr1	11128732	11130239	AT1G31163		Chr1	11343854	11347945	AT1G31690		Chr3	3300085	3303025	AT3G10560			Chr4	6688809	6689679	AT4G10890			Chr3	22847561	22850564	AT3G61730			Chr5	15741916	15745220	AT5G39320
	Chr1	17794560	17795163	AT1G48190		Chr1	18546086	18549046	AT1G50050		Chr1	11166557	11167547	AT1G31250		Chr1	11337536	11341889	AT1G31670		Chr3	3300085	3303025	AT3G10570			Chr1	423186	426045	AT1G08785			Chr3	132418	133245	AT3G00995			Chr1	27898875	27901504	AT1G74180
	Chr1	17857258	17857722	AT1G48325		Chr1	18551121	18552660	AT1G50060		Chr1	11169450	11170396	AT1G31255		Chr1	11349697	11355587	AT1G31710		Chr1	23796511	23800497	AT1G64110			Chr1	20192821	20193756	AT1G54095			Chr2	8867309	8869256	AT2G20590			Chr5	8537621	8539145	AT5G24850
	Chr1	17884645	17885614	AT1G48405		Chr1	18554564	18556826	AT1G50090		Chr1	11169645	11170059	AT1G06427		Chr1	11356076	11358095	AT1G31720		Chr4	14333474	14335446	AT4G29090			Chr3	836044	840492	AT3G03510			Chr5	21276940	21279286	AT5G52410			Chr5	2744803	2749274	AT5G08490
	Chr1	17931390	17934662	AT1G48500		Chr1	18602958	18604826	AT1G50220		Chr1	11175559	11177362	AT1G31260		Chr1	11349697	11355587	AT1G31710		Chr3	2600211	2604446	AT3G08560			Chr3	836044	840492	AT3G03520			Chr3	11069130	11072430	AT3G29080			Chr5	2744803	2749274	AT5G08500
	Chr1	17934746	17936946	AT1G48510		Chr1	18606511	18614500	AT1G50240		Chr1	11178349	11179203	AT1G31270		Chr1	11370585	11372197	AT1G31750		Chr3	2600211	2604446	AT3G08570			Chr3	9574281	9575089	AT3G26170			Chr1	24371487	24373608	AT1G65560			Chr5	16391737	16394273	AT5G40900
	Chr1	17943242	17944315	AT1G48530		Chr1	18634833	18635371	AT1G07617		Chr1	11188120	11192585	AT1G31290		Chr1	11372394	11374301	AT1G31760		Chr4	17403965	17404551	AT4G36925			Chr1	19862668	19864415	AT1G53270			Chr2	16381782	16385728	AT2G39240			Chr5	22567469	22569786	AT5G55760
	Chr1	17957942	17960916	AT1G48580		Chr1	18635955	18638449	AT1G50310		Chr1	11188120	11192585	AT1G31290		Chr1	11377879	11379734	AT1G31772		Chr1	20179907	20180209	AT1G54050			Chr1	29864750	29869538	AT1G79400			Chr2	16381782	16385728	AT2G39230			Chr1	9534692	9536951	AT1G27460
	Chr1	17962520	17964465	AT1G48590		Chr1	18700000	18700444	AT1G50470		Chr1	11198353	11200141	AT1G31310		Chr1	11445490	11450232	AT1G31880		Chr5	4742542	4743804	AT5G14700			Chr1	29864750	29869538	AT1G79410			Chr5	15786622	15788283	AT5G39450			Chr1	25203990	25205840	AT1G67320
	Chr1	17964762	17964989	AT1G07497		Chr1	18742027	18744805	AT1G50610		Chr1	11238298	11239363	AT1G31370		Chr1	11450315	11452068	AT1G31885		Chr5	21649869	21651442	AT5G53370			Chr1	1425595	1426495	AT1G05000			Chr4	2354196	2358861	AT4G04650			Chr1	9441418	9443702	AT1G27180
	Chr1	17986303	17989163	AT1G48640		Chr1	18763640	18764367	AT1G50650		Chr1	11240451	11241099	AT1G31380		Chr1	11475623	11478548	AT1G31950		Chr1	16640191	16642275	AT1G07203			Chr1	780568	782233	AT1G03200			Chr1	3034803	3038155	AT1G09410			Chr2	7926950	7928480	AT2G18220
	Chr1	17995785	17998037	AT1G48660		Chr1	18777601	18778614	AT1G50680		Chr1	11241229	11241474	AT1G06437		Chr1	11488002	11489318	AT1G31990		Chr3	17943840	17946189	AT3G48450			Chr4	151838	153376	AT4G00350			Chr3	6653350	6658795	AT3G19210			Chr1	23462504	23463877	AT1G63250
	Chr1	17998795	18001289	AT1G48670		Chr1	18779606	18780693	AT1G50690		Chr1	11243182	11244392	AT1G31390		Chr1	11495823	11496107	AT1G06493		Chr2	13296161	13298377	AT2G31210			Chr3	22200271	22201196	AT3G60110			Chr1	7098722	7099559	AT1G20490			Chr3	19325007	19328525	AT3G52110
	Chr1	18008813	18010086	AT1G48690		Chr1	18789127	18789687	AT1G50720		Chr1	11245225	11246561	AT1G31400		Chr1	11497402	11497896	AT1G06497		Chr2	15986375	15988636	AT2G38160			Chr1	19481067	19482643	AT1G52315			Chr4	6573305	6577405	AT4G10640			Chr3	19325007	19328525	AT3G52115
	Chr1	18010497	18012888	AT1G48698		Chr1	18813670	18814351	AT1G07683		Chr1	11259851	11261234	AT1G31450		Chr1	11498282	11498595	AT1G06507		Chr3	3470940	3473954	AT3G11080			Chr2	8538025	8539097	AT2G19802			Chr4	6573305	6577405	AT4G10650			Chr3	10475532	10479113	AT3G00470
	Chr1	18011035	18013257	AT1G48700		Chr1	18814947	18815309	AT1G50760		Chr1	11277417	11278462	AT1G31510		Chr1	11498429	11498711	AT1G06513		Chr2	9466456	9467069	AT2G22290			Chr1	25812409	25816584	AT1G68740			Chr3	18085797	18088861	AT3G48770			Chr4	16279698	16280497	AT4G03355
	Chr1	18019274	18020642	AT1G48725		Chr1	18818459	18820503	AT1G50770		Chr1	11278983	11279639	AT1G31520		Chr1	11499282	11499519	AT1G06517		Chr2	14105965	14109730	AT2G33290			Chr1	5227198	5227917	AT1G15190			Chr5	26544824	26546929	AT5G66480			Chr4	16279698	16280497	AT4G33970
	Chr1	18020337	18022277	AT1G48730		Chr1	18855147	18856337	AT1G50870		Chr1	11281188	11282468	AT1G31530		Chr1	11499384	11499883	AT1G06523		Chr2	14105965	14109730	AT2G33280			Chr4	9721152	9721593	AT4G17410			Chr5	12465572	12466459	AT5G33210			Chr3	8699125	8701012	AT3G24090
	Chr1	18023378	18026097	AT1G48740		Chr1	18860837	18861982	AT1G50880		Chr1	11288378	11293799	AT1G31540		Chr1	11512552	11513067	AT1G32020		Chr5	19221490	19224623	AT5G47380			Chr4	12174751	12177439	AT4G23280			Chr4	1396040	1397002	AT4G03156			Chr1	12957913	12960342	AT1G35320
	Chr1	18026811	18027031	AT1G48742		Chr1	18889473	18891838	AT1G50960		Chr1	11288378	11293799	AT1G31540		Chr1	11514594	11515595	AT1G32030		Chr4	13926271	13930175	AT4G28000			Chr4	6441834	6443393	AT4G10390			Chr2	16041703	16042276	AT2G38290			Chr2	18013486	18015391	AT2G43370
	Chr1	18031954	18032156	AT1G07503		Chr1	18896142	18900369	AT1G50970		Chr1	11295446	11297379	AT1G31550		Chr1	11537242	11539896	AT1G32080		Chr2	17092465	17096572	AT2G40955			Chr5	22217804	22221908	AT5G54680			Chr2	13302545	13304641	AT2G31220			Chr5	15429366	15429903	AT5G38540
	Chr1	18049810	18053152	AT1G48800		Chr1	18900541	18902057	AT1G50980		Chr1	11316941	11317894	AT1G31620		Chr1	11546160	11548016	AT1G32100		Chr2	17092465	17096572	AT2G40960			Chr5	22217804	22221908	AT5G54690			Chr5	19765334	19769462	AT5G48740			Chr2	9643325	9646350	AT2G22680
	Chr1	18055229	18059521	AT1G48820		Chr1	18902678	18905490	AT1G50990		Chr1	11318528	11319547	AT1G31630		Chr1	11562742	11564833	AT1G32140		Chr4	9800607	9803358	AT4G17590			Chr4	12537427	12539487	AT4G24150			Chr4	2424571	2426308	AT4G04760			Chr2	16182756	16183854	AT2G38700
	Chr1	18072123	18076405	AT1G48870		Chr1	18909913	18910169	AT1G51000		Chr1	11343854	11347945	AT1G31690		Chr1	11578506	11580547	AT1G32172		Chr5	3548665	3552686	AT5G11160			Chr2	14846745	14847105	AT2G35250			Chr1	1784811	1786422	AT1G05894			Chr1	21746976	21749908	AT1G58602
	Chr1	18091681	18093878	AT1G48910		Chr1	18911389	18912001	AT1G51010		Chr1	11337536	11341889	AT1G31670		Chr1	11581937	11583798	AT1G09115		Chr1	8815218	8818689	AT1G25112			Chr4	17569405	17573228	AT4G37370			Chr1	20252344	20254525	AT1G54240			Chr1	20623941	20625694	AT1G55280
	Chr1	18118017	18120667	AT1G48980		Chr1	18913110	18913828	AT1G51020		Chr1	11349697	11355587	AT1G31710		Chr1	11592927	11596056	AT1G32190		Chr1	8815218	8818689	AT1G25141			Chr4	17569405	17573228	AT4G37380			Chr3	22613589	22614776	AT3G61111			Chr5	26776966	26778667	AT5G67100
	Chr1	18121434	18122155	AT1G48990		Chr1	18915134	18915596	AT1G51030		Chr1	11356076	11358095	AT1G31720		Chr1	11625616	11630745	AT1G32240		Chr5	2392087	2396254	AT5G07570			Chr1	205052	205967	AT1G01570			Chr3	22613589	22614776	AT3G61113			Chr2	13771340	13773264	AT2G32430
	Chr1	18123071	18124289	AT1G49000		Chr1	18917415	18917891	AT1G51035		Chr1	11349697	11355587	AT1G31710		Chr1	11642593	11645237	AT1G32270		Chr1	1211149	1215315	AT1G04470			Chr5	16833218	16835119	AT5G42120			Chr1	876277	877402	AT1G03510			Chr5	198989	200278	AT5G01500
	Chr1	18127990	18128287	AT1G07523		Chr1	18920658	18923319	AT1G51040		Chr1	11370585	11372197	AT1G31750		Chr1	11646189	11647001	AT1G32280		Chr3	17515297	17519075	AT3G47530			Chr2	7566728	7570620	AT2G17430			Chr4	2534849	2536135	AT4G04960			Chr3	9651996	9654322	AT3G26340
	Chr1	18128524	18131522	AT1G49005		Chr1	18948370	18949290	AT1G51150		Chr1	11370585	11372197	AT1G31750		Chr1	11666886	11668690	AT1G32350		Chr1	24969905	24972402	AT1G66930			Chr1	22357068	22360080	AT1G60720			Chr1	7656419	7658550	AT1G21810			Chr3	9651996	9654322	AT3G26350
	Chr1	18136666	18138080	AT1G49030		Chr1	18977176	18980618	AT1G51190		Chr1	11377879	11379734	AT1G31772		Chr1	11678679	11678929	AT1G06543		Chr4	11773354	11778055	AT4G22270			Chr1	22357068	22360080	AT1G60730			Chr5	25613412	25615728	AT5G63990			Chr4	15879680	15880986	AT4G32900
	Chr1	18171563	18172450	AT1G49110		Chr1	18989751	18992149	AT1G51220		Chr1	11445490	11450232	AT1G31880		Chr1	11678886	11680839	AT1G32375		Chr4	11773354	11778055	AT4G22280			Chr4	17423171	17423878	AT4G36950			Chr1	14734946	14745629	AT1G39070			Chr1	7421407	7422767	AT1G21200
	Chr1	18173427	18174416	AT1G49120		Chr1	18997026	18997434	AT1G51230		Chr1	11445490	11450232	AT1G31880		Chr1	11701995	11702903	AT1G32420		Chr1	1249686	1252016	AT1G08855			Chr1	4257386	4259317	AT1G12480			Chr1	5512238	5514124	AT1G16070			Chr5	6142051	6143391	AT5G18510
	Chr1	18166128	18170105	AT1G49100		Chr1	18987702	18989267	AT1G51210		Chr1	11450315	11452068	AT1G31885		Chr1	11704932	11706357	AT1G32430		Chr5	16801751	16806518	AT5G42010			Chr1	4257386	4259317	AT1G04953			Chr2	14873027	14878591	AT2G35340			Chr4	14647135	14647944	AT4G29930
	Chr1	18190470	18190733	AT1G07533		Chr1	19000369	19000945	AT1G51240		Chr1	11475623	11478548	AT1G31950		Chr1	11715147	11719988	AT1G32450		Chr4	16712742	16714858	AT4G35110			Chr1	22911435	22913152	AT1G61990			Chr5	16509525	16509876	AT5G41280			Chr3	20030215	20031567	AT3G08370
	Chr1	18191267	18193782	AT1G49190		Chr1	19001424	19002215	AT1G51250		Chr1	11488002	11489318	AT1G31990		Chr1	11756691	11758118	AT1G32510		Chr3	2700809	2702664	AT3G08870			Chr1	24851720	24854115	AT1G66620			Chr5	25323173	25323766	AT5G63130			Chr3	4146826	4148364	AT3G12980
	Chr1	18205934	18206701	AT1G49220		Chr1	19007364	19011285	AT1G51270		Chr1	11495823	11496107	AT1G06493		Chr1	11774484	11775442	AT1G32560		Chr4	17026061	17030150	AT4G35970			Chr5	19604790	19606630	AT5G48380			Chr5	16655005	16656290	AT5G41650			Chr1	6105946	6109284	AT1G17750
	Chr1	18206312	18211390	AT1G49225		Chr1	19012173	19013306	AT1G51290		Chr1	11497402	11497896	AT1G06497		Chr1	11776765	11777557	AT1G32570		Chr3	22148195	22150514	AT3G59960			Chr3	22193381	22197161	AT3G60100			Chr1	21746982	21754420	AT1G58602			Chr1	6105946	6109284	AT1G05327
	Chr1	18220533	18224325	AT1G49250		Chr1	19014255	19016205	AT1G51300		Chr1	11498282	11498595	AT1G06507		Chr1	11811040	11812380	AT1G32660		Chr5	24867470	24870699	AT5G61930			Chr5	24632359	24634758	AT5G61250			Chr2	3377981	3378296	AT2G07638			Chr1	13106838	13111496	AT1G35540
	Chr1	18222202	18222354	AT1G07537		Chr1	19003219	19005664	AT1G51260		Chr1	11498429	11498711	AT1G06513		Chr1	11813292	11813591	AT1G06603		Chr5	24867470	24870699	AT5G61940			Chr1	23174279	23176415	AT1G62580			Chr4	14709026	14711549	AT4G30090			Chr1	13106838	13111496	AT1G35545
	Chr1	18225870	18226967	AT1G49260		Chr1	19025642	19026769	AT1G51320		Chr1	11499282	11499519	AT1G06517		Chr1	11833113	11833706	AT1G32710		Chr5	26773956	26776303	AT5G67090			Chr1	20433841	20434347	AT1G54760			Chr2	14153786	14155529	AT2G33400			Chr5	23069449	23069722	AT5G57010
	Chr1	18227122	18230330	AT1G49270		Chr1	19028841	19029844	AT1G51330		Chr1	11499384	11499883	AT1G06523		Chr1	11834022	11834226	AT1G32713		Chr3	7992829	7993209	AT3G22550			Chr2	14025669	14028838	AT2G33060			Chr1	20115050	20115659	AT1G53875			Chr3	11024146	11026973	AT3G29033
	Chr1	18230479	18230552	AT1G49280		Chr1	19041397	19042414	AT1G51355		Chr1	11512552	11513067	AT1G32020		Chr1	11865229	11867154	AT1G32770		Chr1	23743555	23745365	AT1G63990			Chr5	16849186	16849601	AT5G42170			Chr4	10670063	10672336	AT4G06900			Chr1	3349591	3350504	AT1G10210
	Chr1	18232407	18233680	AT1G49290		Chr1	19070798	19072753	AT1G51440		Chr1	11514594	11515595	AT1G32030		Chr1	11869752	11872926	AT1G32780		Chr1	5425750	5429533	AT1G15760			Chr4	11773445	11773772	AT4G22270			Chr4	10670063	10672336	AT4G19590			Chr4	11768179	11769363	AT4G22250
	Chr1	18237701	18238497	AT1G49310		Chr1	19076838	19081451	AT1G51460		Chr1	11537242	11539896	AT1G32080		Chr1	11902629	11907049	AT1G32850		Chr1	5425750	5429533	AT1G15770			Chr5	17200898	17205617	AT5G42910			Chr2	1260321	1260493	AT2G03980			Chr5	5185897	5188383	AT5G15880
	Chr1	18234679	18237543	AT1G49300		Chr1	19076838	19081451	AT1G51460		Chr1	11546160	11548016	AT1G32100		Chr1	11911631	11913947	AT1G32870		Chr1	5425750	5429533	AT1G15772			Chr5	19158567	19159951	AT5G47170			Chr3	18355264	18360719	AT3G49520			Chr5	5185897	5188383	AT5G15890
	Chr1	18246305	18248088	AT1G49320		Chr1	19087384	19090523	AT1G51470		Chr1	11562742	11564833	AT1G32140		Chr1	11925320	11927302	AT1G32910		Chr3	16509072	16512966	AT3G45130			Chr4	13327293	13332246	AT4G26350			Chr1	21050289	21051119	AT1G56233			Chr5	18725569	18727623	AT5G46190
	Chr1	18249866	18251038	AT1G49330		Chr1	19090716	19093478	AT1G51480		Chr1	11578506	11580547	AT1G32172		Chr1	11941048	11944824	AT1G32950		Chr3	6793200	6796370	AT3G19560			Chr3	16259520	16262589	AT3G44713			Chr2	14276009	14277111	AT2G33760			Chr1	21715778	21717260	AT1G58440
	Chr1	18290942	18295905	AT1G49430		Chr1	19094888	19097503	AT1G51490		Chr1	11581937	11583798	AT1G09115		Chr1	11945250	11948650	AT1G32960		Chr2	12241756	12244052	AT2G28570			Chr5	18258493	18263627	AT5G45150			Chr5	7993507	7996083	AT5G23700			Chr5	13766154	13769178	AT5G35590
	Chr1	18299430	18299862	AT1G49435		Chr1	19097712	19101265	AT1G51500		Chr1	11586391	11590035	AT1G32180		Chr1	11948650	11951982	AT1G32970		Chr1	1636466	1638652	AT1G05530			Chr1	1128591	1129888	AT1G04240			Chr5	3217675	3221244	AT5G10250			Chr5	1970063	1971371	AT5G06460
	Chr1	18305445	18307557	AT1G49450		Chr1	19204512	19206586	AT1G51780		Chr1	11592927	11596056	AT1G32190		Chr1	11953089	11953899	AT1G32975		Chr2	16430927	16431762	AT2G39350			Chr1	9167808	9170887	AT1G26540			Chr5	3217675	3221244	AT5G10260			Chr5	4956221	4957327	AT5G15265
	Chr1	18310428	18311714	AT1G49470		Chr1	19220236	19225797	AT1G51805		Chr1	11625616	11630745	AT1G32240		Chr1	11954278	11955362	AT1G32980		Chr3	22123518	22126339	AT3G59890			Chr4	17204724	17206511	AT4G36430			Chr5	2344870	2345218	AT5G07400			Chr2	3614980	3627557	AT2G07981
	Chr1	18312883	18314099	AT1G49475		Chr1	19227074	19232359	AT1G51810		Chr1	11642593	11645237	AT1G32270		Chr1	11962746	11964832	AT1G33020		Chr1	5686671	5687454	AT1G16640			Chr5	4139496	4143917	AT5G13060			Chr2	3364656	3365756	AT2G07667			Chr2	3614980	3627557	AT2G08986
	Chr1	18346958	18349049	AT1G49570		Chr1	19227074	19232359	AT1G51810		Chr1	11646189	11647001	AT1G32280		Chr1	11964776	11966320	AT1G33030		Chr5	23954390	23954786	AT5G59390			Chr3	474026	476487	AT3G02330			Chr2	18112417	18114729	AT2G43690			Chr1	28020620	28021798	AT1G74580
	Chr1	18424578	18426782	AT1G49770		Chr1	19232479	19232748	AT1G07767		Chr1	11666886	11668690	AT1G32350		Chr1	11985650	11990520	AT1G33080		Chr1	8169784	8173023	AT1G23060			Chr1	2138031	2139773	AT1G06970			Chr5	15543740	15545241	AT5G38820			Chr2	15483119	15483706	AT2G36885
	Chr1	18434871	18435182	AT1G07597		Chr1	19237219	19241965	AT1G51820		Chr1	11678886	11680839	AT1G32375		Chr1	11985650	11990520	AT1G33080		Chr3	5436404	5439092	AT3G16020			Chr2	18752600	18754784	AT2G45510			Chr3	2677244	2679762	AT3G08820			Chr2	19547114	19550915	AT2G47680
	Chr1	18438012	18439115	AT1G49800		Chr1	19242654	19246154	AT1G51830		Chr1	11695596	11697964	AT1G32415		Chr1	11993298	11996712	AT1G33090		Chr5	1330615	1334834	AT5G04630			Chr5	16684758	16687543	AT5G41730			Chr1	6828342	6831566	AT1G19750			Chr5	15692253	15694852	AT5G39190
	Chr1	18439945	18442237	AT1G49810		Chr1	19249401	19250863	AT1G51840		Chr1	11701995	11702903	AT1G32420		Chr1	11997500	12001421	AT1G33100		Chr5	1330615	1334834	AT5G04640			Chr1	17292321	17293512	AT1G47130			Chr5	21391690	21394360	AT5G52790			Chr5	15692253	15694852	AT5G39200
	Chr1	18458526	18459969	AT1G49860		Chr1	19252811	19256927	AT1G51850		Chr1	11704932	11706357	AT1G32430		Chr1	12026936	12030539	AT1G33170		Chr2	14590155	14591774	AT2G34650			Chr4	9356923	9360057	AT4G16620			Chr3	20921706	20923546	AT3G56420			Chr5	6201437	6202098	AT5G18620
	Chr1	18473908	18477643	AT1G49900		Chr1	19257403	19261794	AT1G51860		Chr1	11715147	11719988	AT1G32450		Chr1	12044872	12045879	AT1G33220		Chr5	16670046	16674235	AT5G41690			Chr1	20769558	20771326	AT1G55590			Chr3	22254978	22255748	AT3G60220			Chr3	1333610	1337432	AT3G04850
	Chr1	18484932	18485639	AT1G49930		Chr1	19262698	19267167	AT1G51870		Chr1	11741083	11741990	AT1G32480		Chr1	12072611	12073965	AT1G33280		Chr2	13722514	13726612	AT2G32300			Chr4	8420314	8424362	AT4G14700			Chr4	8639928	8640223	AT4G15140			Chr2	14407869	14412400	AT2G34100
	Chr1	18486742	18488523	AT1G49938		Chr1	19269817	19274168	AT1G51880		Chr1	11756691	11758118	AT1G32510		Chr1	12081009	12083619	AT1G33320		Chr2	13722514	13726612	AT2G32310			Chr4	8420314	8424362	AT4G06210			Chr3	16719231	16719882	AT3G45560			Chr2	14654337	14655510	AT2G34730
	Chr1	18488127	18491769	AT1G49940		Chr1	19274604	19278798	AT1G51890		Chr1	11774484	11775442	AT1G32560		Chr1	12127389	12130444	AT1G33440		Chr1	8408974	8411703	AT1G23790			Chr2	18429244	18430718	AT2G44690			Chr3	3460079	3463193	AT3G11040			Chr1	17573344	17577311	AT1G47765
	Chr1	18498639	18501886	AT1G49960		Chr1	19279806	19282895	AT1G51900		Chr1	11776765	11777557	AT1G32570		Chr1	12159884	12161314	AT1G33530		Chr5	8706084	8707452	AT5G25190			Chr3	23093698	23095625	AT3G62430			Chr1	26926050	26930285	AT1G71450			Chr2	5688151	5691590	AT2G13650
	Chr1	18546086	18549046	AT1G50050		Chr1	19284270	19288385	AT1G51910		Chr1	11811040	11812380	AT1G32660		Chr1	12162112	12164714	AT1G33540		Chr5	24957578	24958911	AT5G62150			Chr3	1104429	1106990	AT3G04210			Chr1	26926050	26930285	AT1G71460			Chr1	1469681	1470187	AT1G05100
	Chr1	18551121	18552660	AT1G50060		Chr1	19292909	19293339	AT1G51913		Chr1	11813292	11813591	AT1G06603		Chr1	12168768	12172119	AT1G33560		Chr3	5161213	5165098	AT3G15340			Chr5	3043470	3044386	AT5G09800			Chr5	2880707	2886780	AT5G09300			Chr5	1221710	1226119	AT5G04360
	Chr1	18551121	18552660	AT1G50060		Chr1	19293478	19294117	AT1G51915		Chr1	11833113	11833706	AT1G32710		Chr1	12168768	12172119	AT1G33560		Chr4	13885397	13888334	AT4G27890			Chr4	1002771	1005204	AT4G02290			Chr5	2880707	2886780	AT5G09290			Chr2	2260728	2267214	AT2G05914
	Chr1	18554001	18554276	AT1G50080		Chr1	19294184	19294612	AT1G51920		Chr1	11834022	11834226	AT1G32713		Chr1	12177673	12179628	AT1G33590		Chr5	24270614	24274213	AT5G60320			Chr4	13495506	13496935	AT4G26830			Chr4	7964758	7966510	AT4G13710			Chr3	22222177	22226448	AT3G60150
	Chr1	18554564	18556826	AT1G50090		Chr1	19294838	19295236	AT1G51930		Chr1	11865229	11867154	AT1G32770		Chr1	12188678	12190461	AT1G33610		Chr5	24270614	24274213	AT5G60335			Chr3	22297391	22303231	AT3G60330			Chr1	18380274	18381126	AT1G49670			Chr3	22222177	22226448	AT3G60160
	Chr1	18602958	18604826	AT1G50220		Chr1	19314542	19314916	AT1G51970		Chr1	11869752	11872926	AT1G32780		Chr1	12201963	12203408	AT1G33670		Chr1	20549109	20552620	AT1G55070			Chr5	6284037	6286500	AT5G18840			Chr2	2166096	2170679	AT2G05752			Chr5	21747354	21748320	AT5G53530
	Chr1	18634833	18635371	AT1G07617		Chr1	19330949	19332667	AT1G51990		Chr1	11902629	11907049	AT1G32850		Chr1	12219657	12220289	AT1G33710		Chr4	11269839	11271390	AT4G21120			Chr3	21225940	21228537	AT3G57360			Chr3	19577878	19578400	AT3G52830			Chr4	2292792	2297015	AT4G04580
	Chr1	18635955	18638449	AT1G50310		Chr1	19333088	19336135	AT1G52000		Chr1	11925320	11927302	AT1G32910		Chr1	12226852	12228556	AT1G33730		Chr5	6283747	6286630	AT5G18840			Chr3	21225940	21228537	AT3G57370			Chr1	4729156	4733587	AT1G13790			Chr2	17018459	17021570	AT2G40770
	Chr1	18700000	18700444	AT1G50470		Chr1	19345871	19349088	AT1G52030		Chr1	11945250	11948650	AT1G32960		Chr1	12232827	12233098	AT1G06703		Chr2	15686764	15687999	AT2G37380			Chr2	1949412	1952805	AT2G05350			Chr1	4729156	4733587	AT1G13800			Chr4	10856996	10860346	AT4G20060
	Chr1	18763640	18764367	AT1G50650		Chr1	19350314	19352791	AT1G52040		Chr1	11948650	11951982	AT1G32970		Chr1	12233006	12233266	AT1G06707		Chr3	17481856	17482921	AT3G47440			Chr1	23422337	23424972	AT1G63160			Chr3	8518075	8521454	AT3G23670			Chr1	9287179	9289933	AT1G26810
	Chr1	18777601	18778614	AT1G50680		Chr1	19354522	19354861	AT1G07777		Chr1	11953089	11953899	AT1G32975		Chr1	12233632	12236576	AT1G33750		Chr4	9172990	9176623	AT4G16200			Chr5	25797982	25801273	AT5G64540			Chr1	21766301	21767009	AT1G58643			Chr1	21848270	21849305	AT1G59453
	Chr1	18779606	18780693	AT1G50690		Chr1	19354919	19356901	AT1G52050		Chr1	11954278	11955362	AT1G32980		Chr1	12220858	12224108	AT1G33720		Chr4	12768433	12769157	AT4G24770			Chr3	22009028	22011630	AT3G59580			Chr5	3536496	3541071	AT5G11110			Chr5	3745067	3746104	AT5G11650
	Chr1	18789127	18789687	AT1G50720		Chr1	19358800	19360822	AT1G52060		Chr1	11962746	11964832	AT1G33020		Chr1	12237547	12238710	AT1G33760		Chr1	1218038	1220762	AT1G04490			Chr1	18178513	18182119	AT1G49140			Chr3	7962431	7967095	AT3G22460			Chr5	8436473	8436771	AT5G24640
	Chr1	18794134	18794585	AT1G07673		Chr1	19364809	19366925	AT1G52070		Chr1	11964776	11966320	AT1G33030		Chr1	12241614	12245292	AT1G33770		Chr3	8525365	8528454	AT3G23680			Chr1	18178513	18182119	AT1G49160			Chr3	7962431	7967095	AT3G22470			Chr1	9197954	9198933	AT1G26620
	Chr1	18814947	18815309	AT1G50760		Chr1	19373687	19374402	AT1G07783		Chr1	11985650	11990520	AT1G33080		Chr1	12261165	12262750	AT1G33800		Chr3	8525365	8528454	AT3G23685			Chr3	9892822	9895192	AT3G26840			Chr3	7962431	7967095	AT3G22450			Chr2	13967067	13968560	AT2G32930
	Chr1	18855147	18856337	AT1G50870		Chr1	19383078	19385602	AT1G52100		Chr1	11985650	11990520	AT1G33080		Chr1	12267808	12269913	AT1G33811		Chr4	2723528	2725666	AT4G05115			Chr3	21793764	21798296	AT3G58980			Chr1	18489252	18494005	AT1G49940			Chr4	6049618	6049832	AT4G09570
	Chr1	18860837	18861982	AT1G50880		Chr1	19386709	19389740	AT1G52110		Chr1	11993298	11996712	AT1G33090		Chr1	12278438	12279451	AT1G33820		Chr3	23378150	23381346	AT3G63280			Chr3	21793764	21798296	AT3G58990			Chr1	18489252	18494005	AT1G49952			Chr2	18943025	18945024	AT2G46060
	Chr1	18889473	18891838	AT1G50960		Chr1	19396081	19398244	AT1G52120		Chr1	11997500	12001421	AT1G33100		Chr1	12279947	12281406	AT1G33830		Chr1	19896077	19898757	AT1G53330			Chr3	1178248	1180577	AT3G04440			Chr5	16130810	16131196	AT5G40340			Chr4	14172005	14177942	AT4G28710
	Chr1	18900541	18902057	AT1G50980		Chr1	19400510	19402789	AT1G52130		Chr1	12002238	12003005	AT1G33102		Chr1	12283725	12285371	AT1G33840		Chr2	7512124	7515142	AT2G17280			Chr3	1178248	1180577	AT3G04443			Chr1	26343519	26344490	AT1G69940			Chr4	1388133	1391213	AT4G03130
	Chr1	18902678	18905490	AT1G50990		Chr1	19407259	19408319	AT1G52140		Chr1	12003122	12003821	AT1G09135		Chr1	12287913	12288210	AT1G33850		Chr1	4821791	4824924	AT1G14080			Chr1	2929399	2930453	AT1G09080			Chr2	13546374	13550042	AT2G31865			Chr4	13327283	13332161	AT4G26350
	Chr1	18909913	18910169	AT1G51000		Chr1	19409688	19414764	AT1G52150		Chr1	12026936	12030539	AT1G33170		Chr1	12294394	12295305	AT1G33860		Chr1	19542249	19546336	AT1G52450			Chr3	7407286	7409166	AT3G21130			Chr3	7420082	7421599	AT3G21170			Chr1	8720443	8723507	AT1G24610
	Chr1	18911389	18912001	AT1G51010		Chr1	19434480	19439031	AT1G52190		Chr1	12044872	12045879	AT1G33220		Chr1	12297238	12297525	AT1G06713		Chr4	11940914	11943661	AT4G22730			Chr2	12306324	12307648	AT2G28690			Chr4	5504231	5509903	AT4G08630			Chr3	10115239	10118469	AT3G27331
	Chr1	18913110	18913828	AT1G51020		Chr1	19434480	19439031	AT1G52190		Chr1	12072611	12073965	AT1G33280		Chr1	12301325	12303330	AT1G33870		Chr4	11940914	11943661	AT4G07095			Chr4	413395	416033	AT4G00960			Chr4	5504231	5509903	AT4G08620			Chr3	10115239	10118469	AT3G27330
	Chr1	18915134	18915596	AT1G51030		Chr1	19439367	19441724	AT1G52191		Chr1	12081009	12083619	AT1G33320		Chr1	12303862	12305203	AT1G33880		Chr5	14598706	14601864	AT5G36960			Chr5	3598944	3602109	AT5G11290			Chr5	6922636	6926354	AT5G20480			Chr2	18055111	18058648	AT2G43490
	Chr1	18917415	18917891	AT1G51035		Chr1	19514989	19518411	AT1G52400		Chr1	12127389	12130444	AT1G33440		Chr1	12308136	12309914	AT1G33890		Chr4	16909940	16912022	AT4G35655			Chr5	22751023	22752438	AT5G56210			Chr5	25270175	25271468	AT5G62960			Chr4	18201303	18202506	AT4G03515
	Chr1	18920658	18923319	AT1G51040		Chr1	19514989	19518411	AT1G52400		Chr1	12159884	12161314	AT1G33530		Chr1	12311518	12313518	AT1G33900		Chr3	2708214	2709771	AT3G08890			Chr2	18883343	18888773	AT2G45890			Chr2	11063526	11065506	AT2G25940			Chr4	7445437	7446763	AT4G12570
	Chr1	18948370	18949290	AT1G51150		Chr1	19520603	19525685	AT1G52410		Chr1	12162112	12164714	AT1G33540		Chr1	12314904	12316258	AT1G33910		Chr3	2708214	2709771	AT3G08900			Chr2	18883343	18888773	AT2G45900			Chr3	16620598	16620966	AT3G45290			Chr5	26017417	26018771	AT5G65130
	Chr1	18956707	18956925	AT1G07723		Chr1	19526153	19526888	AT1G52415		Chr1	12168768	12172119	AT1G33560		Chr1	12319905	12320870	AT1G33920		Chr3	2708214	2709771	AT3G02085			Chr4	17081012	17083373	AT4G09245			Chr3	21130093	21132640	AT3G57090			Chr3	15753481	15757712	AT3G43920
	Chr1	18977176	18980618	AT1G51190		Chr1	19538821	19540907	AT1G52440		Chr1	12177673	12179628	AT1G33590		Chr1	12323474	12327311	AT1G33930		Chr1	6587638	6593477	AT1G19090			Chr4	17081012	17083373	AT4G36100			Chr3	21130093	21132640	AT3G08845			Chr3	15764009	15768800	AT3G43940
	Chr1	18989751	18992149	AT1G51220		Chr1	19549331	19551282	AT1G52460		Chr1	12188678	12190461	AT1G33610		Chr1	12323474	12327311	AT1G33930		Chr3	4555019	4556986	AT3G13840			Chr1	1709846	1713201	AT1G05700			Chr1	21755105	21759126	AT1G58602			Chr5	21330796	21332119	AT5G52560
	Chr1	18997026	18997434	AT1G51230		Chr1	19553213	19555543	AT1G52470		Chr1	12201963	12203408	AT1G33670		Chr1	12330576	12332785	AT1G33940		Chr3	21225775	21228571	AT3G57360			Chr1	20830859	20834391	AT1G55730			Chr5	25568708	25570215	AT5G63900			Chr5	516787	519628	AT5G02410
	Chr1	19000369	19000945	AT1G51240		Chr1	19556218	19556945	AT1G52490		Chr1	12219657	12220289	AT1G33710		Chr1	12331977	12332469	AT1G33945		Chr3	21225775	21228571	AT3G57370			Chr4	9708910	9713400	AT4G17380			Chr1	5171873	5173518	AT1G15015			Chr5	25582267	25584253	AT5G63930
	Chr1	19001424	19002215	AT1G51250		Chr1	19558499	19559143	AT1G52495		Chr1	12220858	12224108	AT1G33720		Chr1	12332834	12340409	AT1G33950		Chr1	69643	72115	AT1G01150			Chr2	13722481	13726228	AT2G32300			Chr1	5171873	5173518	AT1G15020			Chr4	154149	155336	AT4G00355
	Chr1	19007364	19011285	AT1G51270		Chr1	19618099	19619026	AT1G52680		Chr1	12226852	12228556	AT1G33730		Chr1	12346138	12348733	AT1G33960		Chr1	20567338	20569457	AT1G55120			Chr2	13722481	13726228	AT2G32310			Chr3	4519773	4521124	AT3G13770			Chr1	493642	495023	AT1G02420
	Chr1	19012173	19013306	AT1G51290		Chr1	19619724	19621534	AT1G52690		Chr1	12232827	12233098	AT1G06703		Chr1	12349304	12351318	AT1G33970		Chr5	14546662	14549425	AT5G36900			Chr5	19832052	19833470	AT5G48910			Chr3	4519773	4521124	AT3G02755			Chr1	493642	495023	AT1G04117
	Chr1	19014255	19016205	AT1G51300		Chr1	19621238	19623461	AT1G52695		Chr1	12233006	12233266	AT1G06707		Chr1	12374259	12376367	AT1G34040		Chr3	14311811	14315740	AT3G42155			Chr5	26864539	26867357	AT5G67340			Chr4	9017894	9022871	AT4G15890			Chr1	23734813	23736313	AT1G63950
	Chr1	18987702	18989267	AT1G51210		Chr1	19630884	19634051	AT1G52700		Chr1	12233632	12236576	AT1G33750		Chr1	12380916	12385836	AT1G09185		Chr3	14311811	14315740	AT3G42160			Chr5	24701229	24702648	AT5G61430			Chr5	1081585	1086343	AT5G04020			Chr1	4601327	4604141	AT1G13410
	Chr1	19003219	19005664	AT1G51260		Chr1	19655831	19657795	AT1G52770		Chr1	12220858	12224108	AT1G33720		Chr1	12383777	12384244	AT1G06737		Chr5	19725978	19729568	AT5G48650			Chr4	12576125	12580063	AT4G24250			Chr3	10729060	10732089	AT3G28630			Chr1	20248617	20250208	AT1G54220
	Chr1	19025642	19026769	AT1G51320		Chr1	19664023	19665631	AT1G52800		Chr1	12237547	12238710	AT1G33760		Chr1	12384322	12385041	AT1G06743		Chr1	2344471	2346846	AT1G07620			Chr4	12576125	12580063	AT4G24260			Chr3	10729060	10732089	AT3G28635			Chr1	19821910	19824012	AT1G53170
	Chr1	19028841	19029844	AT1G51330		Chr1	19672476	19673652	AT1G52830		Chr1	12241614	12245292	AT1G33770		Chr1	12388595	12389447	AT1G34046		Chr4	1003378	1005224	AT4G02290			Chr1	21254060	21255718	AT1G56690			Chr4	16608431	16611814	AT4G34850			Chr5	4717872	4718636	AT5G14620
	Chr1	19041397	19042414	AT1G51355		Chr1	19696923	19698482	AT1G52890		Chr1	12256474	12260638	AT1G33790		Chr1	12390238	12390915	AT1G34047		Chr5	1468840	1470879	AT5G04980			Chr2	9810941	9813382	AT2G23050			Chr4	16608431	16611814	AT4G34860			Chr2	16210038	16210313	AT2G38770
	Chr1	19070798	19072753	AT1G51440		Chr1	19702062	19702916	AT1G52900		Chr1	12256474	12260638	AT1G33790		Chr1	12390448	12391149	AT1G34049		Chr4	14632321	14636083	AT4G29920			Chr2	9810941	9813382	AT2G23060			Chr3	2600446	2604383	AT3G08560			Chr5	363893	364707	AT5G01940
	Chr1	19076838	19081451	AT1G51460		Chr1	19740400	19743449	AT1G52990		Chr1	12261165	12262750	AT1G33800		Chr1	12393426	12396194	AT1G34050		Chr1	3323039	3323399	AT1G10140			Chr5	24211971	24213224	AT5G60130			Chr3	2600446	2604383	AT3G08570			Chr1	2039606	2040225	AT1G06660
	Chr1	19087384	19090523	AT1G51470		Chr1	19754214	19755843	AT1G53023		Chr1	12267808	12269913	AT1G33811		Chr1	12433356	12434735	AT1G34140		Chr3	5086283	5087396	AT3G15115			Chr3	2044734	2046850	AT3G06560			Chr1	2911518	2915865	AT1G09040			Chr1	5998873	6001916	AT1G17460
	Chr1	19090716	19093478	AT1G51480		Chr1	19781288	19782352	AT1G53080		Chr1	12278438	12279451	AT1G33820		Chr1	12448543	12451287	AT1G34180		Chr3	862591	863338	AT3G03580			Chr2	15718056	15719276	AT2G37440			Chr3	1255186	1256604	AT3G04620			Chr3	3245375	3249699	AT3G10440
	Chr1	19094888	19097503	AT1G51490		Chr1	19794723	19795544	AT1G53130		Chr1	12279947	12281406	AT1G33830		Chr1	12536310	12541938	AT1G34355		Chr3	5557526	5561141	AT3G16370			Chr5	7050647	7053630	AT5G20830			Chr5	19659868	19660744	AT5G48515			Chr4	17234107	17235459	AT4G36520
	Chr1	19097712	19101265	AT1G51500		Chr1	19796560	19796764	AT1G07857		Chr1	12283725	12285371	AT1G33840		Chr1	12591348	12593579	AT1G34440		Chr3	5557526	5561141	AT3G16380			Chr3	23295524	23297638	AT3G63030			Chr2	426526	426795	AT2G01920			Chr3	10231858	10236001	AT3G27640
	Chr1	19097712	19101265	AT1G51500		Chr1	19796662	19796897	AT1G07863		Chr1	12287913	12288210	AT1G33850		Chr1	12601014	12601360	AT1G06757		Chr5	10282423	10284293	AT5G28290			Chr3	23295524	23297638	AT3G63040			Chr5	2346203	2348615	AT5G07410			Chr1	29282332	29285903	AT1G77860
	Chr1	19204512	19206586	AT1G51780		Chr1	19806263	19807705	AT1G53160		Chr1	12294394	12295305	AT1G33860		Chr1	12595110	12602379	AT1G34460		Chr5	10282423	10284293	AT5G28295			Chr5	15811416	15814280	AT5G00570			Chr1	28747007	28747754	AT1G76600			Chr1	29282332	29285903	AT1G77870
	Chr1	19206615	19211971	AT1G51790		Chr1	19806917	19807113	AT1G07867		Chr1	12297238	12297525	AT1G06713		Chr1	12602761	12603484	AT1G06763		Chr1	18279055	18282598	AT1G49390			Chr1	7927806	7930511	AT1G22460			Chr2	12707504	12707680	AT2G29740			Chr1	19798654	19801256	AT1G53140
	Chr1	19214072	19218053	AT1G51800		Chr1	19812087	19813290	AT1G53163		Chr1	12301325	12303330	AT1G33870		Chr1	12602898	12603141	AT1G06773		Chr3	9892789	9895239	AT3G26840			Chr4	6160447	6161917	AT4G09780			Chr1	16716252	16718609	AT1G44020			Chr3	7096480	7099671	AT3G20350
	Chr1	19220236	19225797	AT1G51805		Chr1	19859267	19860976	AT1G53260		Chr1	12303862	12305203	AT1G33880		Chr1	12607222	12609084	AT1G34480		Chr5	3598834	3602263	AT5G11290			Chr5	23851971	23853836	AT5G59090			Chr5	598188	599179	AT5G02650			Chr1	25961909	25964156	AT1G69050
	Chr1	19227074	19232359	AT1G51810		Chr1	19895227	19895733	AT1G53325		Chr1	12308136	12309914	AT1G33890		Chr1	12609440	12610495	AT1G34490		Chr5	3598834	3602263	AT5G11300			Chr4	16820108	16825926	AT4G35380			Chr4	8103759	8105510	AT4G14050			Chr3	6639745	6640913	AT3G19190
	Chr1	19232479	19232748	AT1G07767		Chr1	19898849	19901091	AT1G53340		Chr1	12311518	12313518	AT1G33900		Chr1	12611638	12612663	AT1G34500		Chr2	15030811	15032982	AT2G35760			Chr4	15117799	15120440	AT4G31070			Chr1	13080405	13089371	AT1G35520			Chr4	9508404	9513349	AT4G16900
	Chr1	19237219	19241965	AT1G51820		Chr1	19907179	19908548	AT1G53360		Chr1	12314904	12316258	AT1G33910		Chr1	12615690	12617032	AT1G34510		Chr4	18249357	18253560	AT4G39190			Chr4	15117799	15120440	AT4G31073			Chr1	20127583	20128203	AT1G53900			Chr4	8299346	8299595	AT4G14410
	Chr1	19242294	19242437	AT1G51823		Chr1	19909840	19909977	AT1G53366		Chr1	12319905	12320870	AT1G33920		Chr1	12623434	12624508	AT1G34520		Chr1	8195903	8198201	AT1G23100			Chr2	18505205	18510181	AT2G44880			Chr2	6975383	6979338	AT2G16040			Chr1	4515747	4516956	AT1G13220
	Chr1	19242654	19246154	AT1G51830		Chr1	19910516	19911646	AT1G53370		Chr1	12323474	12327311	AT1G33930		Chr1	12637054	12638692	AT1G34540		Chr1	8195903	8198201	AT1G23110			Chr2	18505205	18510181	AT2G44890			Chr5	23212845	23217700	AT5G57320			Chr5	5737263	5740914	AT5G17420
	Chr1	19249401	19250863	AT1G51840		Chr1	19926626	19931494	AT1G53420		Chr1	12323474	12327311	AT1G33930		Chr1	12646674	12652646	AT1G34550		Chr1	8195903	8198201	AT1G05787			Chr3	17899814	17900352	AT3G48343			Chr2	2088883	2093164	AT2G05635			Chr5	20521017	20523141	AT5G50390
	Chr1	19252811	19256927	AT1G51850		Chr1	19980299	19981199	AT1G53540		Chr1	12330576	12332785	AT1G33940		Chr1	12657027	12658756	AT1G34575		Chr2	10565797	10566518	AT2G24780			Chr3	7233017	7235963	AT3G20700			Chr5	26181694	26183967	AT5G65500			Chr2	17613227	17613440	AT2G42280
	Chr1	19257403	19261794	AT1G51860		Chr1	20001236	20004055	AT1G53600		Chr1	12331977	12332469	AT1G33945		Chr1	12660497	12663870	AT1G34580		Chr5	6545351	6547107	AT5G19410			Chr3	22937026	22941235	AT3G61950			Chr2	13631361	13631696	AT2G32020			Chr2	17613227	17613440	AT2G09350
	Chr1	19262698	19267167	AT1G51870		Chr1	20006460	20007015	AT1G09605		Chr1	12332834	12340409	AT1G33950		Chr1	12660497	12663870	AT1G34580		Chr1	4478451	4480631	AT1G13140			Chr3	22937026	22941235	AT3G61940			Chr3	11370723	11372841	AT3G00570			Chr2	5774653	5775453	AT2G13820
	Chr1	19269817	19274168	AT1G51880		Chr1	20007811	20008234	AT1G09615		Chr1	12346138	12348733	AT1G33960		Chr1	12692995	12697834	AT1G34650		Chr1	4478451	4480631	AT1G13143			Chr1	11102329	11104019	AT1G06407			Chr4	12929558	12933545	AT4G25240			Chr1	26925151	26930247	AT1G71450
	Chr1	19274604	19278798	AT1G51890		Chr1	20007960	20008159	AT1G07913		Chr1	12349304	12351318	AT1G33970		Chr1	12709090	12710665	AT1G34670		Chr1	21116662	21117932	AT1G56410			Chr1	11102329	11104019	AT1G31095			Chr1	19798115	19801249	AT1G53140			Chr1	26925151	26930247	AT1G71460
	Chr1	19274604	19278798	AT1G51890		Chr1	20008996	20009320	AT1G53610		Chr1	12374259	12376367	AT1G34040		Chr1	12743722	12745748	AT1G34760		Chr4	17092934	17097190	AT4G36120			Chr4	8244153	8248004	AT4G14330			Chr1	3279788	3283123	AT1G10050			Chr3	3978182	3979098	AT3G12545
	Chr1	19279806	19282895	AT1G51900		Chr1	20010405	20011084	AT1G07917		Chr1	12380916	12385836	AT1G09185		Chr1	12763902	12765686	AT1G34790		Chr1	11654546	11656575	AT1G32320			Chr5	4966743	4971075	AT5G15290			Chr1	6319766	6324330	AT1G18370			Chr3	3978182	3979098	AT3G12550
	Chr1	19284270	19288385	AT1G51910		Chr1	20011429	20011972	AT1G53620		Chr1	12383777	12384244	AT1G06737		Chr1	12851983	12853235	AT1G35140		Chr4	6365747	6367662	AT4G10230			Chr5	4966743	4971075	AT5G15300			Chr1	27499489	27503775	AT1G73130			Chr4	2415509	2416791	AT4G04965
	Chr1	19292909	19293339	AT1G51913		Chr1	20014379	20015038	AT1G53625		Chr1	12384322	12385041	AT1G06743		Chr1	12870563	12872257	AT1G35170		Chr1	21253729	21255709	AT1G56690			Chr5	3549332	3552651	AT5G11160			Chr1	27499489	27503775	AT1G73140			Chr3	6654593	6658892	AT3G19210
	Chr1	19293478	19294117	AT1G51915		Chr1	20017389	20017932	AT1G53633		Chr1	12388595	12389447	AT1G34046		Chr1	12882654	12884762	AT1G35183		Chr5	22510276	22514273	AT5G55565			Chr3	9861568	9863882	AT3G26800			Chr1	25962115	25963630	AT1G69050			Chr5	8236799	8238205	AT5G24260
	Chr1	19294184	19294612	AT1G51920		Chr1	20018634	20019086	AT1G07923		Chr1	12390238	12390915	AT1G34047		Chr1	12896582	12897675	AT1G35210		Chr4	14720253	14723799	AT4G30110			Chr4	13482100	13486015	AT4G26780			Chr1	22460461	22460888	AT1G60987			Chr3	300822	301937	AT3G01850
	Chr1	19294838	19295236	AT1G51930		Chr1	20018743	20018942	AT1G07927		Chr1	12390448	12391149	AT1G34049		Chr1	12907870	12908342	AT1G06827		Chr5	18743479	18747169	AT5G46240			Chr4	13482100	13486015	AT4G26770			Chr1	26821016	26822414	AT1G71120			Chr5	23627190	23629976	AT5G58450
	Chr1	19314542	19314916	AT1G51970		Chr1	20019287	20019835	AT1G53635		Chr1	12393426	12396194	AT1G34050		Chr1	12917070	12917829	AT1G35230		Chr1	28689925	28693510	AT1G76470			Chr3	22052130	22053819	AT3G59700			Chr1	22997988	22999676	AT1G62260			Chr2	10779796	10781225	AT2G25312
	Chr1	19330949	19332667	AT1G51990		Chr1	20020885	20025541	AT1G53640		Chr1	12411670	12412514	AT1G34095		Chr1	12932024	12934656	AT1G35250		Chr1	28689925	28693510	AT1G76480			Chr2	11936025	11938480	AT2G28040			Chr5	19726022	19729541	AT5G48650			Chr1	30200012	30200966	AT1G80340
	Chr1	19333088	19336135	AT1G52000		Chr1	20020885	20025541	AT1G53640		Chr1	12433356	12434735	AT1G34140		Chr1	12935647	12936586	AT1G35255		Chr1	3474502	3477872	AT1G10540			Chr2	11936025	11938480	AT2G28050			Chr4	2183334	2187228	AT4G04845			Chr3	239421	240751	AT3G01640
	Chr1	19345871	19349088	AT1G52030		Chr1	20033885	20036189	AT1G53660		Chr1	12448543	12451287	AT1G34180		Chr1	12936849	12937787	AT1G35260		Chr3	10253699	10255279	AT3G27680			Chr4	12544700	12548884	AT4G24170			Chr5	20722754	20725501	AT5G50930			Chr1	2814564	2817825	AT1G08800
	Chr1	19345871	19349088	AT1G52030		Chr1	20038320	20039164	AT1G53680		Chr1	12514106	12516521	AT1G34315		Chr1	12939071	12939354	AT1G06853		Chr1	3892123	3894779	AT1G11590			Chr4	12544700	12548884	AT4G24175			Chr5	20722754	20725501	AT5G50940			Chr3	17991148	17992489	AT3G48540
	Chr1	19350314	19352791	AT1G52040		Chr1	20039463	20039616	AT1G53683		Chr1	12516112	12516555	AT1G34317		Chr1	12947517	12948849	AT1G35290		Chr1	7105453	7109915	AT1G20515			Chr3	3189980	3191116	AT3G10310			Chr3	7162278	7167446	AT3G20520			Chr5	26304119	26305111	AT5G65750
	Chr1	19354522	19354861	AT1G07777		Chr1	20041518	20041734	AT1G53687		Chr1	12536310	12541938	AT1G34355		Chr1	12956119	12957090	AT1G35310		Chr1	7105453	7109915	AT1G20530			Chr5	1595499	1598668	AT5G05390			Chr3	7162278	7167446	AT3G20530			Chr1	2917083	2919508	AT1G09050
	Chr1	19354919	19356901	AT1G52050		Chr1	20042452	20043626	AT1G53690		Chr1	12591348	12593579	AT1G34440		Chr1	12964986	12966113	AT1G35330		Chr4	13666092	13668921	AT4G27290			Chr5	1595499	1598668	AT5G05400			Chr1	1362614	1364866	AT1G04840			Chr1	23636358	23637474	AT1G63720
	Chr1	19358800	19360822	AT1G52060		Chr1	20048434	20050294	AT1G53700		Chr1	12601014	12601360	AT1G06757		Chr1	12958841	12962853	AT1G35320		Chr4	6573256	6576920	AT4G10640			Chr3	549218	550451	AT3G02590			Chr5	16477319	16479823	AT5G41160			Chr3	1880768	1882892	AT3G06210
	Chr1	19364809	19366925	AT1G52070		Chr1	20050475	20051451	AT1G53705		Chr1	12595110	12602379	AT1G34460		Chr1	12972058	12972304	AT1G06857		Chr4	6573256	6576920	AT4G10650			Chr5	26636814	26638600	AT5G66710			Chr5	16477319	16479823	AT5G41170			Chr4	10033362	10035184	AT4G18080
	Chr1	19373687	19374402	AT1G07783		Chr1	20079081	20081464	AT1G53790		Chr1	12602761	12603484	AT1G06763		Chr1	12972132	12972468	AT1G06863		Chr4	15223272	15225159	AT4G31370			Chr1	11475329	11480166	AT1G31950			Chr5	3267758	3270935	AT5G10380			Chr4	10033362	10035184	AT4G18090
	Chr1	19383078	19385602	AT1G52100		Chr1	20090249	20090962	AT1G53815		Chr1	12602898	12603141	AT1G06773		Chr1	12980689	12984740	AT1G35350		Chr5	26218878	26219912	AT5G65609			Chr4	10661496	10664960	AT4G19560			Chr5	3267758	3270935	AT5G10390			Chr2	15436423	15439537	AT2G36810
	Chr1	19386709	19389740	AT1G52110		Chr1	20091491	20092423	AT1G53820		Chr1	12607222	12609084	AT1G34480		Chr1	12988649	12989373	AT1G35353		Chr5	26218878	26219912	AT5G65610			Chr3	19399195	19402764	AT3G52310			Chr5	3267758	3270935	AT5G10400			Chr1	6646168	6650279	AT1G19230
	Chr1	19396081	19398244	AT1G52120		Chr1	20093470	20093717	AT1G07937		Chr1	12609440	12610495	AT1G34490		Chr1	12991392	12992145	AT1G35365		Chr5	22594653	22597478	AT5G55830			Chr1	29350827	29352869	AT1G78060			Chr2	17450187	17456854	AT2G41830			Chr1	6646168	6650279	AT1G19240
	Chr1	19400510	19402789	AT1G52130		Chr1	20098522	20100978	AT1G53830		Chr1	12611638	12612663	AT1G34500		Chr1	13035294	13036037	AT1G35440		Chr1	24828475	24830042	AT1G66550			Chr5	17130521	17131301	AT5G42720			Chr2	11565618	11566009	AT2G27080			Chr3	22026596	22027778	AT3G59630
	Chr1	19407259	19408319	AT1G52140		Chr1	20140279	20140887	AT1G53930		Chr1	12615690	12617032	AT1G34510		Chr1	13061549	13063455	AT1G35490		Chr5	19484011	19488682	AT5G48090			Chr5	17987411	17989281	AT5G44590			Chr4	15118009	15120458	AT4G31070			Chr5	13417424	13420174	AT5G35170
	Chr1	19430505	19431010	AT1G07793		Chr1	20143144	20144974	AT1G53940		Chr1	12623434	12624508	AT1G34520		Chr1	13110517	13112832	AT1G35545		Chr2	390570	391666	AT2G01880			Chr3	5867211	5868336	AT3G17190			Chr4	15118009	15120458	AT4G31073			Chr4	12080088	12082971	AT4G23050
	Chr1	19434480	19439031	AT1G52190		Chr1	20146393	20146813	AT1G53945		Chr1	12637054	12638692	AT1G34540		Chr1	13112506	13113136	AT1G35550		Chr2	12857902	12859649	AT2G30115			Chr5	23024541	23029828	AT5G56930			Chr3	22758597	22758826	AT3G61490			Chr2	2984047	2988726	AT2G07190
	Chr1	19439367	19441724	AT1G52191		Chr1	20147503	20148068	AT1G53950		Chr1	12643648	12643882	AT1G06777		Chr1	13162966	13164512	AT1G35630		Chr1	18105360	18106721	AT1G48940			Chr2	16344652	16346662	AT2G39180			Chr1	23866824	23870496	AT1G64310			Chr3	2683146	2686181	AT3G08840
	Chr1	19441636	19443631	AT1G52200		Chr1	20148419	20149749	AT1G53970		Chr1	12643681	12643997	AT1G06783		Chr1	13220471	13224681	AT1G35710		Chr1	3780794	3786017	AT1G11270			Chr1	20131426	20132852	AT1G53903			Chr1	23866824	23870496	AT1G64320			Chr5	7377263	7378361	AT5G22290
	Chr1	19441636	19443631	AT1G52200		Chr1	20148899	20149728	AT1G53980		Chr1	12646674	12652646	AT1G34550		Chr1	13225168	13227239	AT1G35720		Chr1	21554978	21558124	AT1G58215			Chr5	9206408	9207489	AT5G26270			Chr5	24895071	24898967	AT5G61980			Chr4	18514927	18515326	AT4G39917
	Chr1	19469820	19472582	AT1G52290		Chr1	20154154	20156520	AT1G54000		Chr1	12653961	12654779	AT1G34560		Chr1	13227137	13229931	AT1G35730		Chr5	26401324	26405040	AT5G66020			Chr2	14596639	14597479	AT2G34655			Chr2	4095686	4099748	AT2G10550			Chr4	14736550	14738093	AT4G30130
	Chr1	19514989	19518411	AT1G52400		Chr1	20151016	20152752	AT1G53990		Chr1	12657027	12658756	AT1G34575		Chr1	13253398	13255570	AT1G35750		Chr1	214737	217262	AT1G01590			Chr2	19357805	19361047	AT2G47160			Chr3	23299843	23301445	AT3G63060			Chr1	21884119	21886583	AT1G59580
	Chr1	19520603	19525685	AT1G52410		Chr1	20158589	20160864	AT1G54010		Chr1	12660497	12663870	AT1G34580		Chr1	13281163	13282042	AT1G09235		Chr3	5267254	5269252	AT3G15550			Chr2	16688554	16689866	AT2G39980			Chr1	6302832	6303015	AT1G18310			Chr3	6495845	6498792	AT3G18840
	Chr1	19526153	19526888	AT1G52415		Chr1	20161555	20163750	AT1G54020		Chr1	12660497	12663870	AT1G34580		Chr1	13314707	13314965	AT1G06933		Chr1	5097703	5102090	AT1G14800			Chr2	19058072	19061225	AT2G46430			Chr5	20967212	20967493	AT5G51620			Chr3	9899450	9901862	AT3G26860
	Chr1	19538821	19540907	AT1G52440		Chr1	20170715	20173949	AT1G54040		Chr1	12692995	12697834	AT1G34650		Chr1	13320657	13320875	AT1G06937		Chr3	5655474	5658156	AT3G16610			Chr2	19075329	19078527	AT2G46480			Chr2	18885855	18888510	AT2G45900			Chr2	13042158	13043826	AT2G30615
	Chr1	19549331	19551282	AT1G52460		Chr1	20235465	20237358	AT1G54200		Chr1	12709090	12710665	AT1G34670		Chr1	13320675	13322511	AT1G35830		Chr1	18953363	18956109	AT1G51170			Chr1	26259131	26260259	AT1G69780			Chr4	11325493	11331919	AT4G21250			Chr1	22637468	22641132	AT1G61360
	Chr1	19553213	19555543	AT1G52470		Chr1	20250518	20252365	AT1G54230		Chr1	12743722	12745748	AT1G34760		Chr1	13339804	13341228	AT1G35880		Chr3	22937002	22941305	AT3G61950			Chr1	28936679	28937844	AT1G09925			Chr4	11325493	11331919	AT4G21260			Chr4	2226091	2229204	AT4G04460
	Chr1	19556218	19556945	AT1G52490		Chr1	20270810	20272106	AT1G54300		Chr1	12763902	12765686	AT1G34790		Chr1	13339804	13341228	AT1G35880		Chr3	22937002	22941305	AT3G61940			Chr1	28936679	28937844	AT1G76994			Chr4	11325493	11331919	AT4G21270			Chr4	2226091	2229204	AT4G04470
	Chr1	19558499	19559143	AT1G52495		Chr1	20279507	20280952	AT1G54330		Chr1	12851983	12853235	AT1G35140		Chr1	13341300	13341953	AT1G35890		Chr1	29508941	29510954	AT1G78430			Chr4	17210319	17214014	AT4G36450			Chr3	2901294	2901907	AT3G09430			Chr3	10887378	10891943	AT3G28870
	Chr1	19618099	19619026	AT1G52680		Chr1	20307572	20308846	AT1G54400		Chr1	12870563	12872257	AT1G35170		Chr1	13346878	13354225	AT1G35895		Chr1	18541199	18543697	AT1G50040			Chr1	22551415	22552929	AT1G61180			Chr1	1445352	1448455	AT1G05035			Chr2	10659184	10661480	AT2G25050
	Chr1	19619724	19621534	AT1G52690		Chr1	20336203	20339769	AT1G54450		Chr1	12882654	12884762	AT1G35183		Chr1	13362962	13365172	AT1G35910		Chr5	948538	949901	AT5G03668			Chr3	2956245	2958381	AT3G09640			Chr1	1445352	1448455	AT1G04317			Chr1	21551813	21552925	AT1G58200
	Chr1	19621238	19623461	AT1G52695		Chr1	20344698	20348097	AT1G54470		Chr1	12896582	12897675	AT1G35210		Chr1	13454496	13456336	AT1G36060		Chr5	948538	949901	AT5G03670			Chr4	10203765	10208364	AT4G18490			Chr1	1445352	1448455	AT1G05040			Chr4	2577897	2578111	AT4G05030
	Chr1	19630884	19634051	AT1G52700		Chr1	20348397	20349032	AT1G54475		Chr1	12917070	12917829	AT1G35230		Chr1	13470980	13471202	AT1G06947		Chr1	5735526	5738695	AT1G16770			Chr3	9899721	9902223	AT3G26860			Chr5	19691055	19695599	AT5G48575			Chr2	10026429	10030417	AT2G23560
	Chr1	19664023	19665631	AT1G52800		Chr1	20366313	20367117	AT1G54530		Chr1	12930980	12931555	AT1G35242		Chr1	13471047	13471267	AT1G06953		Chr1	5735526	5738695	AT1G16760			Chr3	21972761	21973800	AT3G59450			Chr5	19691055	19695599	AT5G48570			Chr2	10026429	10030417	AT2G23550
	Chr1	19671300	19672021	AT1G52827		Chr1	20367553	20368511	AT1G54540		Chr1	12932024	12934656	AT1G35250		Chr1	13528257	13529470	AT1G36150		Chr1	18730880	18735152	AT1G50580			Chr3	1960411	1961776	AT3G00210			Chr4	105635	111629	AT4G00240			Chr5	4726081	4728675	AT5G14650
	Chr1	19672476	19673652	AT1G52830		Chr1	20369651	20370986	AT1G54550		Chr1	12935647	12936586	AT1G35255		Chr1	14158452	14161938	AT1G37130		Chr1	18730880	18735152	AT1G50590			Chr1	7131338	7134297	AT1G20590			Chr2	15576256	15581123	AT2G37060			Chr5	4726081	4728675	AT5G14660
	Chr1	19681209	19681787	AT1G52857		Chr1	20371469	20380156	AT1G54560		Chr1	12936849	12937787	AT1G35260		Chr1	14170351	14172106	AT1G37140		Chr3	19127947	19130489	AT3G51570			Chr1	7131338	7134297	AT1G20600			Chr2	15576256	15581123	AT2G37070			Chr4	13201687	13204667	AT4G26020
	Chr1	19682773	19683565	AT1G52855		Chr1	20386809	20387710	AT1G54575		Chr1	12939071	12939354	AT1G06853		Chr1	14174798	14178034	AT1G37150		Chr2	18112374	18114704	AT2G43690			Chr2	15031514	15032951	AT2G35760			Chr4	9069050	9079008	AT4G16015			Chr4	14199152	14199507	AT4G28730
	Chr1	19688708	19690589	AT1G52880		Chr1	20391560	20393503	AT1G54590		Chr1	12947517	12948849	AT1G35290		Chr1	14174798	14178034	AT1G37150		Chr2	6054273	6056787	AT2G14288			Chr1	28592174	28593030	AT1G76190			Chr1	4751546	4751936	AT1G13890			Chr4	13184156	13186919	AT4G25970
	Chr1	19696923	19698482	AT1G52890		Chr1	20400211	20401025	AT1G54620		Chr1	12956119	12957090	AT1G35310		Chr1	15081952	15085893	AT1G40104		Chr1	20250565	20251019	AT1G54230			Chr3	22048765	22051463	AT3G59690			Chr1	27211804	27214483	AT1G72280			Chr4	17028317	17030237	AT4G35970
	Chr1	19702062	19702916	AT1G52900		Chr1	20422831	20423754	AT1G54720		Chr1	12964986	12966113	AT1G35330		Chr1	15603568	15607966	AT1G41830		Chr5	26946515	26949232	AT5G67550			Chr3	22048765	22051463	AT3G59695			Chr4	2263085	2268183	AT4G04555			Chr3	10457392	10458001	AT3G28100
	Chr1	19740400	19743449	AT1G52990		Chr1	20457257	20458631	AT1G54860		Chr1	12958841	12962853	AT1G35320		Chr1	15980135	15983571	AT1G42560		Chr1	26925147	26929954	AT1G71450			Chr4	15545056	15547327	AT4G32190			Chr2	10769228	10771884	AT2G25295			Chr1	20277690	20278485	AT1G54320
	Chr1	19754214	19755843	AT1G53023		Chr1	20458952	20460647	AT1G54870		Chr1	12972058	12972304	AT1G06857		Chr1	16131687	16132318	AT1G07143		Chr1	26925147	26929954	AT1G71460			Chr4	11099232	11103452	AT4G20700			Chr2	10769228	10771884	AT2G25297			Chr2	6389158	6389597	AT2G14860
	Chr1	19756445	19759700	AT1G53025		Chr1	20462940	20464697	AT1G54890		Chr1	12972132	12972468	AT1G06863		Chr1	16133286	16135587	AT1G42980		Chr3	499030	499802	AT3G02430			Chr4	11099232	11103452	AT4G20703			Chr3	11757813	11758154	AT3G02865			Chr4	11404008	11405951	AT4G03065
	Chr1	19781288	19782352	AT1G53080		Chr1	20478030	20479769	AT1G54930		Chr1	12980689	12984740	AT1G35350		Chr1	16140526	16141792	AT1G43000		Chr1	27239293	27241457	AT1G72350			Chr4	11099232	11103452	AT4G20707			Chr1	16670825	16673156	AT1G43950			Chr4	11404008	11405951	AT4G21410
	Chr1	19794723	19795544	AT1G53130		Chr1	20481648	20484799	AT1G54940		Chr1	12980689	12984740	AT1G35350		Chr1	16151095	16152240	AT1G43005		Chr5	16977305	16979590	AT5G42450			Chr5	18412681	18413502	AT5G45440			Chr4	14120404	14122693	AT4G28570			Chr2	7646492	7647920	AT2G17580
	Chr1	19796560	19796764	AT1G07857		Chr1	20484709	20485135	AT1G08007		Chr1	12988649	12989373	AT1G35353		Chr1	16153609	16154468	AT1G43010		Chr5	26603840	26604318	AT5G66650			Chr3	22148196	22150311	AT3G59960			Chr5	20507223	20508810	AT5G50365			Chr5	17190831	17191982	AT5G42880
	Chr1	19796662	19796897	AT1G07863		Chr1	20488088	20491291	AT1G54950		Chr1	12991392	12992145	AT1G35365		Chr1	16155278	16157950	AT1G43020		Chr3	7572413	7574997	AT3G21490			Chr4	12147736	12151534	AT4G23210			Chr5	20507223	20508810	AT5G07615			Chr3	16969316	16970236	AT3G46200
	Chr1	19806263	19807705	AT1G53160		Chr1	20488088	20491291	AT1G54950		Chr1	13035294	13036037	AT1G35440		Chr1	16232415	16232773	AT1G07147		Chr3	7572413	7574997	AT3G21500			Chr4	12872435	12876641	AT4G25070			Chr2	1949318	1952885	AT2G05350			Chr5	5869303	5872684	AT5G17790
	Chr1	19806917	19807113	AT1G07867		Chr1	20493114	20493595	AT1G08013		Chr1	13061549	13063455	AT1G35490		Chr1	16232785	16236109	AT1G43140		Chr5	16898453	16902233	AT5G42260			Chr5	6341273	6341988	AT5G18990			Chr4	11275264	11275981	AT4G21130			Chr1	26108280	26111347	AT1G69450
	Chr1	19812087	19813290	AT1G53163		Chr1	20495106	20495432	AT1G54953		Chr1	13110517	13112832	AT1G35545		Chr1	16269075	16270513	AT1G43171		Chr3	23211331	23214473	AT3G62740			Chr1	24848379	24850861	AT1G66600			Chr3	5319751	5320223	AT3G15690			Chr2	9383570	9385660	AT2G22070
	Chr1	19831352	19833028	AT1G53180		Chr1	20495302	20495680	AT1G08017		Chr1	13112506	13113136	AT1G35550		Chr1	16401079	16401324	AT1G07157		Chr2	8035391	8040862	AT2G18530			Chr1	24848379	24850861	AT1G66610			Chr1	30316334	30319042	AT1G80660			Chr4	16806253	16806594	AT4G35320
	Chr1	19895227	19895733	AT1G53325		Chr1	20495410	20495793	AT1G08023		Chr1	13162966	13164512	AT1G35630		Chr1	16408889	16409127	AT1G07163		Chr5	26663432	26667314	AT5G66780			Chr5	6673909	6675623	AT5G19740			Chr1	13308417	13312594	AT1G35820			Chr2	17452918	17456603	AT2G41830
	Chr1	19898849	19901091	AT1G53340		Chr1	20496761	20497288	AT1G08027		Chr1	13220471	13224681	AT1G35710		Chr1	16415357	16416022	AT1G43600		Chr5	26663432	26667314	AT5G66790			Chr1	22897050	22901049	AT1G61940			Chr2	13748670	13749339	AT2G32390			Chr3	17750187	17751713	AT3G48070
	Chr1	19907179	19908548	AT1G53360		Chr1	20499776	20504076	AT1G54960		Chr1	13225168	13227239	AT1G35720		Chr1	16417285	16417517	AT1G07173		Chr4	14115455	14117264	AT4G28556			Chr1	22897050	22901049	AT1G61950			Chr1	8324975	8329640	AT1G23450			Chr5	1879982	1882750	AT5G06220
	Chr1	19909840	19909977	AT1G53366		Chr1	20504901	20506504	AT1G54970		Chr1	13227137	13229931	AT1G35730		Chr1	16416062	16416771	AT1G07167		Chr4	14115455	14117264	AT4G28560			Chr2	15686757	15687812	AT2G37380			Chr1	8324975	8329640	AT1G23460			Chr2	14596654	14600403	AT2G34655
	Chr1	19910516	19911646	AT1G53370		Chr1	20507375	20508355	AT1G54980		Chr1	13253398	13255570	AT1G35750		Chr1	16416733	16417928	AT1G43605		Chr4	17789168	17790439	AT4G03425			Chr1	10861150	10864708	AT1G30640			Chr4	14420829	14422068	AT4G29250			Chr2	409381	411798	AT2G01905
	Chr1	19926626	19931494	AT1G53420		Chr1	20516916	20517531	AT1G55010		Chr1	13281163	13282042	AT1G09235		Chr1	16424578	16425345	AT1G43610		Chr4	17789168	17790439	AT4G37840			Chr5	9531841	9533637	AT5G27090			Chr1	7346353	7346593	AT1G21010			Chr1	29541804	29544749	AT1G78540
	Chr1	19980299	19981199	AT1G53540		Chr1	20524694	20525192	AT1G09655		Chr1	13314707	13314965	AT1G06933		Chr1	16436250	16437755	AT1G43630		Chr5	26276421	26278749	AT5G65685			Chr1	22733419	22735165	AT1G61610			Chr5	12674395	12678300	AT5G33406			Chr5	2196131	2198395	AT5G07070
	Chr1	20001236	20004055	AT1G53600		Chr1	20530417	20532151	AT1G55030		Chr1	13320657	13320875	AT1G06937		Chr1	16439367	16441941	AT1G43640		Chr5	26276421	26278749	AT5G09435			Chr4	1193354	1197425	AT4G02710			Chr5	5516551	5516894	AT5G16770			Chr1	10298804	10299954	AT1G29410
	Chr1	20006460	20007015	AT1G09605		Chr1	20525654	20530468	AT1G55020		Chr1	13320675	13322511	AT1G35830		Chr1	16443582	16446918	AT1G43650		Chr2	17845307	17846950	AT2G42885			Chr5	26603631	26604289	AT5G66650			Chr5	5516551	5516894	AT5G16780			Chr4	1154058	1155889	AT4G02640
	Chr1	20007811	20008234	AT1G09615		Chr1	20541837	20545861	AT1G55050		Chr1	13339804	13341228	AT1G35880		Chr1	16472205	16473343	AT1G43680		Chr5	6341190	6341992	AT5G18990			Chr2	7503744	7507947	AT2G17260			Chr1	16236683	16242909	AT1G43145			Chr3	19242705	19244268	AT3G51870
	Chr1	20007960	20008159	AT1G07913		Chr1	20560258	20563269	AT1G55110		Chr1	13339804	13341228	AT1G35880		Chr1	16563811	16567399	AT1G43780		Chr5	26423746	26425553	AT5G66080			Chr1	14153839	14156216	AT1G07013			Chr4	13765342	13766317	AT4G27580			Chr2	14380707	14382377	AT2G34040
	Chr1	20008996	20009320	AT1G53610		Chr1	20600883	20601436	AT1G55220		Chr1	13341300	13341953	AT1G35890		Chr1	16575759	16576541	AT1G43790		Chr5	15741916	15745404	AT5G39320			Chr5	13199562	13200204	AT5G34883			Chr4	16882939	16887774	AT4G35560			Chr1	23650956	23652080	AT1G63750
	Chr1	20010405	20011084	AT1G07917		Chr1	20602819	20604033	AT1G55230		Chr1	13346878	13354225	AT1G35895		Chr1	16577521	16579722	AT1G43800		Chr4	13357223	13361293	AT4G26440			Chr4	13257370	13259677	AT4G26170			Chr5	25390448	25392538	AT5G63390			Chr5	6446142	6450957	AT5G19170
	Chr1	20011429	20011972	AT1G53620		Chr1	20604892	20606411	AT1G55240		Chr1	13362962	13365172	AT1G35910		Chr1	16580447	16580800	AT1G43810		Chr2	14370404	14373718	AT2G34020			Chr4	10146161	10148356	AT4G18360			Chr3	2776620	2781815	AT3G09080			Chr5	1010788	1013606	AT5G03800
	Chr1	20014379	20015038	AT1G53625		Chr1	20614573	20616466	AT1G55260		Chr1	13454496	13456336	AT1G36060		Chr1	16655884	16657686	AT1G43910		Chr1	3288148	3289488	AT1G10070			Chr2	17141918	17142362	AT2G41120			Chr4	16810511	16811643	AT4G35350			Chr4	7340869	7342764	AT4G12400
	Chr1	20017389	20017932	AT1G53633		Chr1	20626029	20627513	AT1G55290		Chr1	13470980	13471202	AT1G06947		Chr1	16739192	16741652	AT1G44050		Chr5	9392536	9397365	AT5G26580			Chr2	17141918	17142362	AT2G09230			Chr3	873815	875222	AT3G03620			Chr5	16094097	16097777	AT5G40270
	Chr1	20018634	20019086	AT1G07923		Chr1	20676504	20678607	AT1G55380		Chr1	13471047	13471267	AT1G06953		Chr1	16753944	16755670	AT1G44080		Chr2	17790956	17791563	AT2G42730			Chr1	22668793	22672446	AT1G61440			Chr3	18666078	18666593	AT3G50340			Chr5	1499376	1504002	AT5G05080
	Chr1	20018743	20018942	AT1G07927		Chr1	20680876	20683143	AT1G55390		Chr1	13528257	13529470	AT1G36150		Chr1	16755832	16756032	AT1G07237		Chr5	19612080	19616653	AT5G48390			Chr2	762453	763526	AT2G02720			Chr1	4601307	4604153	AT1G13410			Chr2	11177085	11178807	AT2G26260
	Chr1	20019287	20019835	AT1G53635		Chr1	20691591	20694039	AT1G55420		Chr1	13545965	13558600	AT1G36180		Chr1	16760616	16762486	AT1G44090		Chr5	21174123	21176106	AT5G52115			Chr3	8001962	8003729	AT3G22580			Chr5	7536639	7540909	AT5G22670			Chr3	8552404	8555297	AT3G23740
	Chr1	20020885	20025541	AT1G53640		Chr1	20697392	20699687	AT1G55430		Chr1	14158452	14161938	AT1G37130		Chr1	16787508	16789436	AT1G44130		Chr1	7251894	7254318	AT1G20850			Chr2	16544785	16545624	AT2G39700			Chr5	7536639	7540909	AT5G22680			Chr1	20988344	20992367	AT1G56120
	Chr1	20033885	20036189	AT1G53660		Chr1	20701363	20703460	AT1G55440		Chr1	14158452	14161938	AT1G37130		Chr1	16794820	16796450	AT1G44160		Chr2	11795664	11798416	AT2G27650			Chr3	20717806	20718834	AT3G55840			Chr5	7536639	7540909	AT5G22660			Chr1	4303146	4306894	AT1G12640
	Chr1	20038320	20039164	AT1G53680		Chr1	20748639	20753079	AT1G55550		Chr1	14170351	14172106	AT1G37140		Chr1	16811345	16811569	AT1G07247		Chr1	22897405	22901723	AT1G61940			Chr1	7009634	7013403	AT1G20230			Chr3	15345270	15345751	AT3G43420			Chr1	4303146	4306894	AT1G12650
	Chr1	20039463	20039616	AT1G53683		Chr1	20754217	20756656	AT1G55560		Chr1	14174798	14178034	AT1G37150		Chr1	16811377	16811940	AT1G07253		Chr1	22897405	22901723	AT1G61950			Chr1	7009634	7013403	AT1G20240			Chr2	18670939	18672041	AT2G45280			Chr1	8962180	8963827	AT1G25520
	Chr1	20041518	20041734	AT1G53687		Chr1	20757767	20760268	AT1G55570		Chr1	15081952	15085893	AT1G40104		Chr1	16812746	16812944	AT1G07257		Chr1	23911163	23911827	AT1G64390			Chr4	17026048	17030223	AT4G35970			Chr3	10331180	10335247	AT3G27870			Chr1	6132866	6135234	AT1G05333
	Chr1	20042452	20043626	AT1G53690		Chr1	20763844	20765823	AT1G55580		Chr1	15081952	15085893	AT1G40104		Chr1	16813599	16814733	AT1G44191		Chr4	13369725	13371699	AT4G26470			Chr1	5639115	5639898	AT1G16500			Chr2	15986410	15988571	AT2G38160			Chr1	6132866	6135234	AT1G17820
	Chr1	20048434	20050294	AT1G53700		Chr1	20769300	20771880	AT1G55590		Chr1	15603568	15607966	AT1G41830		Chr1	16817048	16817318	AT1G07263		Chr2	11242533	11242880	AT2G26420			Chr2	13047472	13052348	AT2G30630			Chr1	13350734	13350961	AT1G35895			Chr1	7344253	7346853	AT1G21010
	Chr1	20050475	20051451	AT1G53705		Chr1	20772218	20772302	AT1G55591		Chr1	15980135	15983571	AT1G42560		Chr1	16817810	16818214	AT1G07267		Chr5	3041768	3044403	AT5G09800			Chr5	17451727	17452776	AT5G43420			Chr5	18470926	18474215	AT5G45570			Chr5	20325571	20327775	AT5G49960
	Chr1	20079081	20081464	AT1G53790		Chr1	20774046	20776294	AT1G55600		Chr1	16115430	16116111	AT1G09475		Chr1	16807828	16810565	AT1G44180		Chr3	22476527	22480958	AT3G60840			Chr2	17903713	17903960	AT2G43050			Chr3	23083663	23084565	AT3G62380			Chr5	10775973	10780212	AT5G28730
	Chr1	20090249	20090962	AT1G53815		Chr1	20793720	20794577	AT1G55640		Chr1	16131687	16132318	AT1G07143		Chr1	16820929	16821823	AT1G44224		Chr5	1974727	1975483	AT5G06470			Chr1	17572973	17576120	AT1G47765			Chr5	21636401	21638307	AT5G53320			Chr5	26864520	26867398	AT5G67340
	Chr1	20091491	20092423	AT1G53820		Chr1	20796340	20798594	AT1G55650		Chr1	16140526	16141792	AT1G43000		Chr1	16831016	16834011	AT1G44318		Chr2	1032838	1034550	AT2G03420			Chr3	19812960	19815617	AT3G53450			Chr5	21230889	21236604	AT5G52290			Chr3	10730224	10735041	AT3G28635
	Chr1	20093470	20093717	AT1G07937		Chr1	20800694	20802377	AT1G55660		Chr1	16151095	16152240	AT1G43005		Chr1	16834210	16838562	AT1G44350		Chr2	1032838	1034550	AT2G03410			Chr4	17032709	17033861	AT4G35985			Chr2	10177920	10181905	AT2G23910			Chr3	10730224	10735041	AT3G28640
	Chr1	20098522	20100978	AT1G53830		Chr1	20821591	20823640	AT1G55700		Chr1	16153609	16154468	AT1G43010		Chr1	16852341	16853238	AT1G44478		Chr1	19716153	19718947	AT1G52940			Chr1	2911355	2915233	AT1G09040			Chr2	752539	755737	AT2G02695			Chr5	889579	891865	AT5G03540
	Chr1	20140279	20140887	AT1G53930		Chr1	20828118	20830640	AT1G55720		Chr1	16155278	16157950	AT1G43020		Chr1	16864831	16866787	AT1G44542		Chr2	7072056	7073635	AT2G16340			Chr3	6165498	6166624	AT3G18020			Chr2	12236058	12239032	AT2G28560			Chr3	5317037	5318521	AT3G15690
	Chr1	20143144	20144974	AT1G53940		Chr1	20835256	20838778	AT1G55740		Chr1	16232415	16232773	AT1G07147		Chr1	16913994	16917053	AT1G44800		Chr1	18667078	18671940	AT1G50400			Chr5	3372562	3373897	AT5G10680			Chr3	19868861	19871757	AT3G53590			Chr4	12643002	12643488	AT4G24460
	Chr1	20146393	20146813	AT1G53945		Chr1	20852491	20853395	AT1G55775		Chr1	16232785	16236109	AT1G43140		Chr1	16913994	16917053	AT1G44800		Chr2	16374818	16376904	AT2G39220			Chr3	19037260	19038714	AT3G51280			Chr2	1402083	1404686	AT2G04160			Chr2	11713653	11715788	AT2G27380
	Chr1	20147503	20148068	AT1G53950		Chr1	20853872	20856122	AT1G55790		Chr1	16269075	16270513	AT1G43171		Chr1	16933699	16934568	AT1G44830		Chr4	1250054	1253106	AT4G02800			Chr4	6677315	6679618	AT4G10860			Chr2	1402083	1404686	AT2G04725			Chr1	119410	119630	AT1G01305
	Chr1	20148419	20149749	AT1G53970		Chr1	20856526	20857630	AT1G55800		Chr1	16401079	16401324	AT1G07157		Chr1	16963125	16965019	AT1G44890		Chr1	4599019	4599189	AT1G13400			Chr4	12141112	12143679	AT4G23190			Chr5	23273199	23274872	AT5G57450			Chr1	28171110	28172681	AT1G75020
	Chr1	20148899	20149728	AT1G53980		Chr1	20917190	20918462	AT1G55928		Chr1	16408889	16409127	AT1G07163		Chr1	16965181	16965586	AT1G44895		Chr5	23696560	23697368	AT5G58630			Chr5	16406840	16410405	AT5G40940			Chr5	1615715	1619052	AT5G05460			Chr3	18356993	18360594	AT3G49520
	Chr1	20154154	20156520	AT1G54000		Chr1	20957098	20958550	AT1G56030		Chr1	16415357	16416022	AT1G43600		Chr1	16992570	16992951	AT1G07273		Chr3	20090233	20091444	AT3G08380			Chr1	4850312	4851142	AT1G14185			Chr2	10884560	10885280	AT2G25565			Chr5	15656795	15659264	AT5G39110
	Chr1	20158589	20160864	AT1G54010		Chr1	20960356	20961870	AT1G56040		Chr1	16417285	16417517	AT1G07173		Chr1	16992748	16992951	AT1G07277		Chr2	15894532	15898020	AT2G37980			Chr2	18115608	18118597	AT2G43700			Chr2	10884560	10885280	AT2G25570			Chr3	5476134	5477981	AT3G16170
	Chr1	20161555	20163750	AT1G54020		Chr1	20980369	20984115	AT1G56100		Chr1	16416062	16416771	AT1G07167		Chr1	16993891	16994045	AT1G07283		Chr4	7320424	7321815	AT4G12334			Chr5	17920322	17923623	AT5G44480			Chr3	9099211	9103448	AT3G24900			Chr3	4176589	4177694	AT3G13050
	Chr1	20151016	20152752	AT1G53990		Chr1	20983737	20984402	AT1G56105		Chr1	16416733	16417928	AT1G43605		Chr1	16994155	16995044	AT1G44940		Chr4	7320424	7321815	AT4G12340			Chr1	4811874	4816189	AT1G14040			Chr3	9681941	9682817	AT3G26440			Chr3	20451518	20452453	AT3G55160
	Chr1	20170715	20173949	AT1G54040		Chr1	20994746	21001013	AT1G56130		Chr1	16424578	16425345	AT1G43610		Chr1	16995113	16995295	AT1G44941		Chr1	28113439	28115138	AT1G74830			Chr1	27065126	27065751	AT1G71910			Chr3	9681941	9682817	AT3G26450			Chr4	1297	3668	AT4G00020
	Chr1	20206930	20207555	AT1G54120		Chr1	21017311	21018122	AT1G56150		Chr1	16436250	16437755	AT1G43630		Chr1	17002089	17003867	AT1G44970		Chr1	28174346	28175961	AT1G75030			Chr2	17850027	17853910	AT2G42890			Chr1	11741611	11741826	AT1G32480			Chr3	5042750	5046118	AT3G14980
	Chr1	20235465	20237358	AT1G54200		Chr1	21022384	21023587	AT1G56160		Chr1	16439367	16441941	AT1G43640		Chr1	17013385	17015520	AT1G45010		Chr1	2156892	2158204	AT1G07025			Chr1	21887793	21888908	AT1G59590			Chr2	14213762	14215934	AT2G33560			Chr5	22930211	22932877	AT5G56650
	Chr1	20270810	20272106	AT1G54300		Chr1	21022759	21024402	AT1G56165		Chr1	16443582	16446918	AT1G43650		Chr1	17033335	17035105	AT1G45063		Chr1	10372070	10373267	AT1G29660			Chr1	1618866	1623419	AT1G05490			Chr1	10442136	10446183	AT1G29830			Chr2	11068333	11069246	AT2G25950
	Chr1	20279507	20280952	AT1G54330		Chr1	21056099	21057577	AT1G56240		Chr1	16472205	16473343	AT1G43680		Chr1	17050631	17052189	AT1G45100		Chr5	21794075	21798562	AT5G53660			Chr1	27524578	27526379	AT1G73200			Chr2	18429427	18430703	AT2G44690			Chr3	2232840	2236140	AT3G07060
	Chr1	20307572	20308846	AT1G54400		Chr1	21056401	21057815	AT1G56242		Chr1	16563811	16567399	AT1G43780		Chr1	17074942	17076417	AT1G45145		Chr5	7991119	7995805	AT5G23700			Chr1	10372123	10373260	AT1G29660			Chr4	13042281	13048013	AT4G25540			Chr1	17371877	17377778	AT1G47380
	Chr1	20336203	20339769	AT1G54450		Chr1	21061522	21063047	AT1G56250		Chr1	16575759	16576541	AT1G43790		Chr1	17115762	17119246	AT1G45191		Chr2	11978221	11979869	AT2G28110			Chr4	15273778	15275171	AT4G31500			Chr5	21524585	21525900	AT5G53090			Chr1	28837205	28842351	AT1G76820
	Chr1	20344698	20348097	AT1G54470		Chr1	21071017	21071650	AT1G56270		Chr1	16577521	16579722	AT1G43800		Chr1	17123785	17129223	AT1G45201		Chr2	11324647	11329028	AT2G26620			Chr5	25869352	25872044	AT5G64710			Chr1	9107558	9113154	AT1G26330			Chr5	22164639	22169366	AT5G54570
	Chr1	20348397	20349032	AT1G54475		Chr1	21098603	21100842	AT1G56360		Chr1	16580447	16580800	AT1G43810		Chr1	17123785	17129223	AT1G45201		Chr5	4818944	4823537	AT5G14890			Chr3	11280382	11283644	AT3G29375			Chr5	2332851	2338680	AT5G07380			Chr5	22164639	22169366	AT5G54569
	Chr1	20366313	20367117	AT1G54530		Chr1	21101327	21102701	AT1G56380		Chr1	16655884	16657686	AT1G43910		Chr1	17183347	17186602	AT1G45616		Chr5	4818944	4823537	AT5G14895			Chr3	11280382	11283644	AT3G29380			Chr5	2332851	2338680	AT5G07390			Chr4	15812114	15815024	AT4G32790
	Chr1	20367553	20368511	AT1G54540		Chr1	21106245	21106797	AT1G56385		Chr1	16714622	16715564	AT1G44010		Chr1	17224720	17226541	AT1G46264		Chr5	19216980	19217804	AT5G47370			Chr5	26433407	26436259	AT5G66130			Chr3	22024366	22025027	AT3G59620			Chr1	9511795	9512689	AT1G27385
	Chr1	20369651	20370986	AT1G54550		Chr1	21111727	21113621	AT1G56400		Chr1	16739192	16741652	AT1G44050		Chr1	17230411	17230653	AT1G46336		Chr1	340081	341824	AT1G01980			Chr5	17425343	17428141	AT5G43400			Chr5	5756750	5758712	AT5G17460			Chr5	23271096	23274893	AT5G57440
	Chr1	20371469	20380156	AT1G54560		Chr1	21119816	21120415	AT1G56415		Chr1	16753944	16755670	AT1G44080		Chr1	17232135	17232951	AT1G46408		Chr2	19043780	19044898	AT2G46400			Chr1	22486301	22488237	AT1G61050			Chr4	7429200	7431932	AT4G12540			Chr5	23271096	23274893	AT5G57450
	Chr1	20386809	20387710	AT1G54575		Chr1	21117147	21119241	AT1G56410		Chr1	16755832	16756032	AT1G07237		Chr1	17233552	17234237	AT1G09495		Chr1	27082529	27083396	AT1G71960			Chr4	9656021	9660012	AT4G17220			Chr4	13772826	13776469	AT4G27595			Chr2	12128475	12130731	AT2G28360
	Chr1	20400211	20401025	AT1G54620		Chr1	21136835	21138277	AT1G56430		Chr1	16760616	16762486	AT1G44090		Chr1	17236524	17238185	AT1G46480		Chr4	15012631	15017071	AT4G30830			Chr1	10543269	10548112	AT1G30050			Chr1	27964025	27965218	AT1G74400			Chr2	444099	445195	AT2G01950
	Chr1	20422831	20423754	AT1G54720		Chr1	21167565	21173632	AT1G56510		Chr1	16787508	16789436	AT1G44130		Chr1	17270185	17271706	AT1G46840		Chr1	17726584	17727952	AT1G48050			Chr1	10543269	10548112	AT1G30070			Chr5	19051574	19052259	AT5G46915			Chr2	9270849	9272394	AT2G21710
	Chr1	20430769	20431986	AT1G54740		Chr1	21174609	21179077	AT1G56520		Chr1	16794820	16796450	AT1G44160		Chr1	17272521	17273629	AT1G46912		Chr1	19531720	19536320	AT1G52430			Chr1	29508939	29511020	AT1G78430			Chr2	7818606	7819778	AT2G17970			Chr3	2374819	2377453	AT3G07420
	Chr1	20457257	20458631	AT1G54860		Chr1	21181585	21185495	AT1G56540		Chr1	16811345	16811569	AT1G07247		Chr1	17274722	17275834	AT1G46984		Chr1	28435738	28439205	AT1G75730			Chr2	14880062	14880556	AT2G35345			Chr5	12082163	12083249	AT5G32460			Chr4	128738	129704	AT4G00300
	Chr1	20458952	20460647	AT1G54870		Chr1	21185592	21188369	AT1G56550		Chr1	16811377	16811940	AT1G07253		Chr1	17339561	17340972	AT1G47300		Chr1	21884620	21888933	AT1G59580			Chr5	2845675	2848268	AT5G08730			Chr4	14115457	14116498	AT4G28556			Chr3	21128720	21132669	AT3G57090
[truncated: 9,904 more rows]

## Sheet: list of hyper and hypo H3k27me3
hyper H3K27me3 in ref6 compare to WT	hypo H3K27me3 in ref6 compare to WT	hyper H3K27me3 in elf6 compare to WT	hypo H3K27me3 in elf compare to WT	hyper H3K27me3 in ref6 elf6 compare to WT	hypo H3K27me3 in ref6 elf6 compare to WT	hyper H3K27me3 in EPIC A5.B1 compare to WT	hypo H3K27me3 in EPIC A5.B1 compare to WT
[truncated: 5,414 more rows]
