# Supplementary figures and images for: A new role for histone demethylases in the maintenance of plant genome integrity
Source: eLife journal article supplement (doi:10.7554/elife.58533), 2020-10-27

A

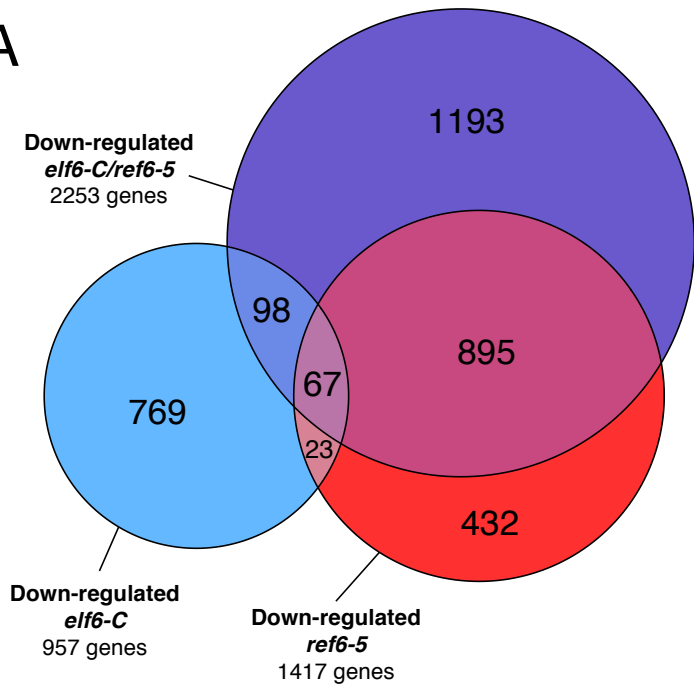

B

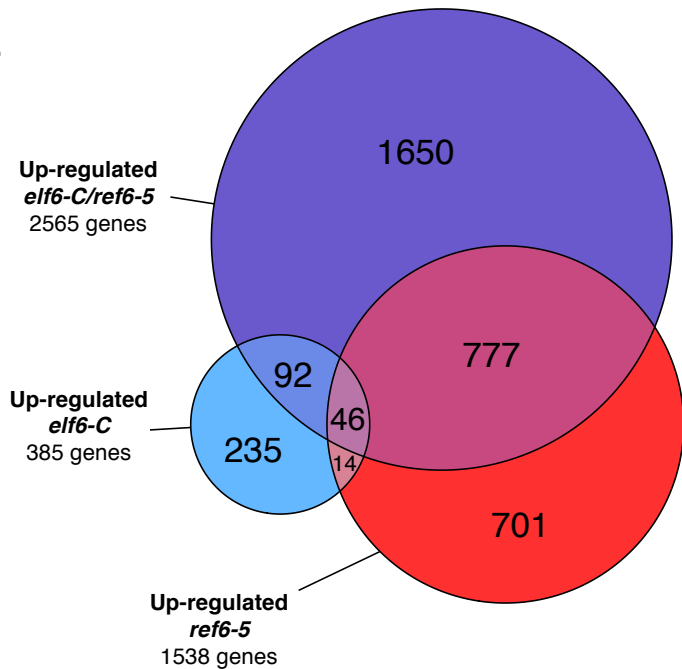

Supplement: supp [file elife-58533-supp-v1.zip]

A

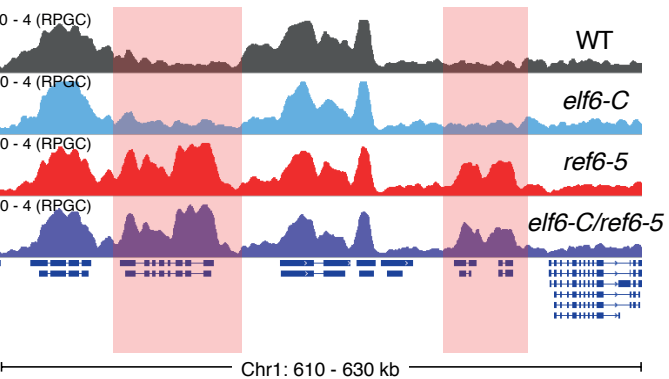

B

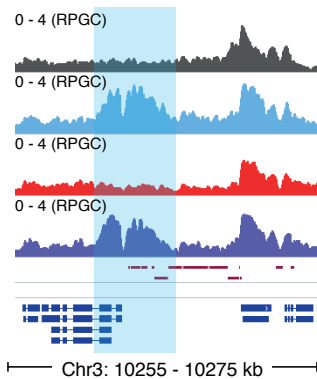

C

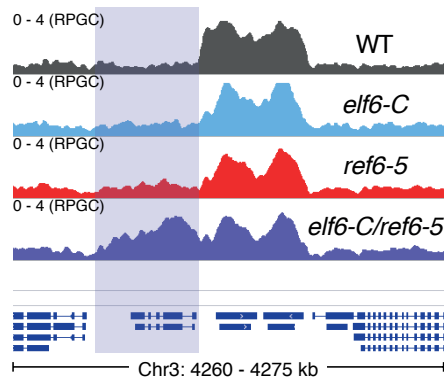

Supplement: supp [file elife-58533-supp-v1.zip]

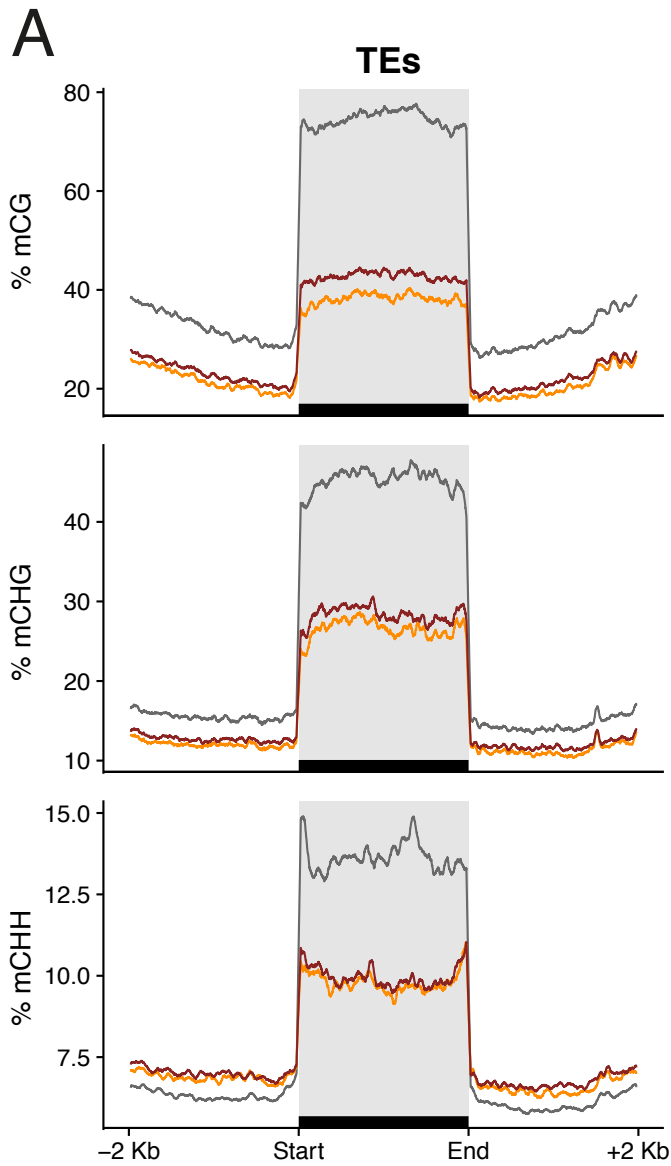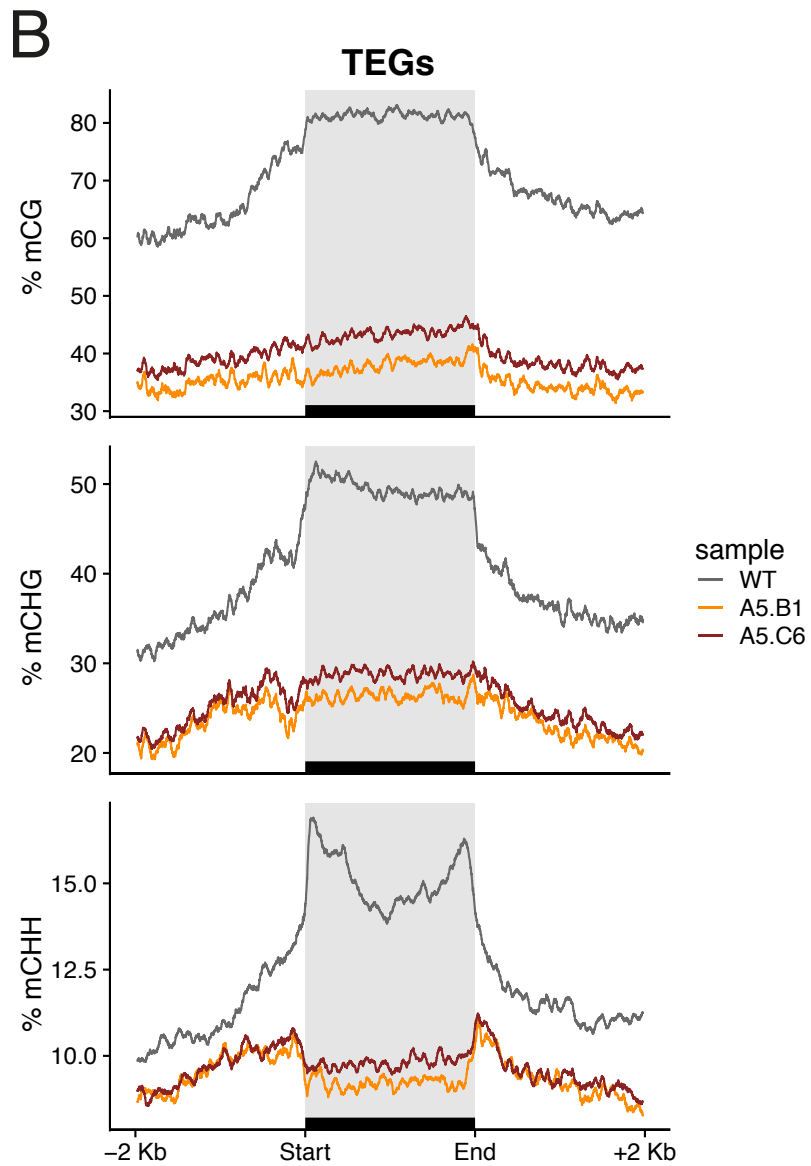

Supplement: supp [file elife-58533-supp-v1.zip]

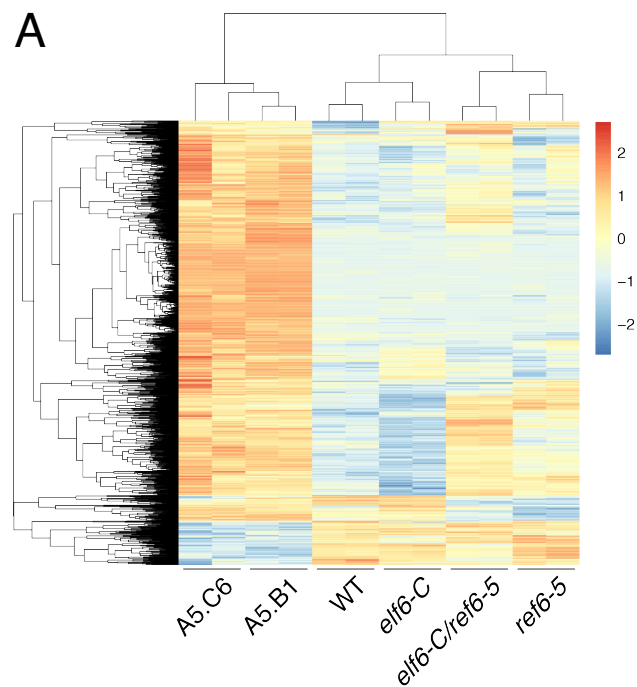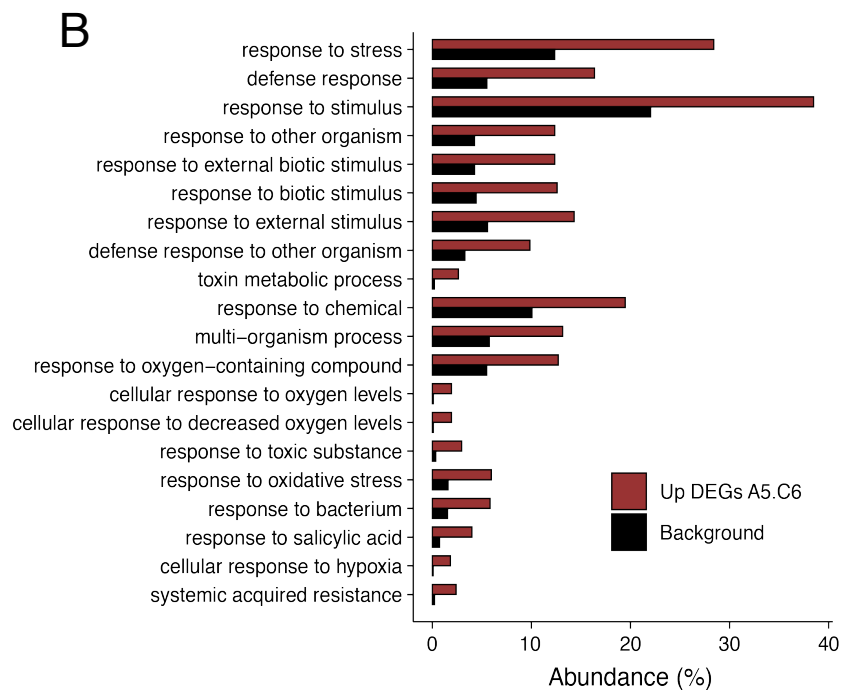

Supplement: supp [file elife-58533-supp-v1.zip]

A

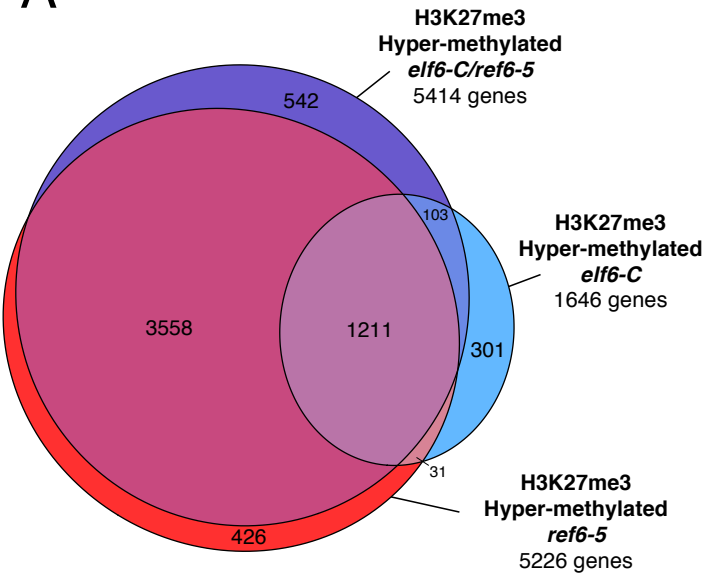

B

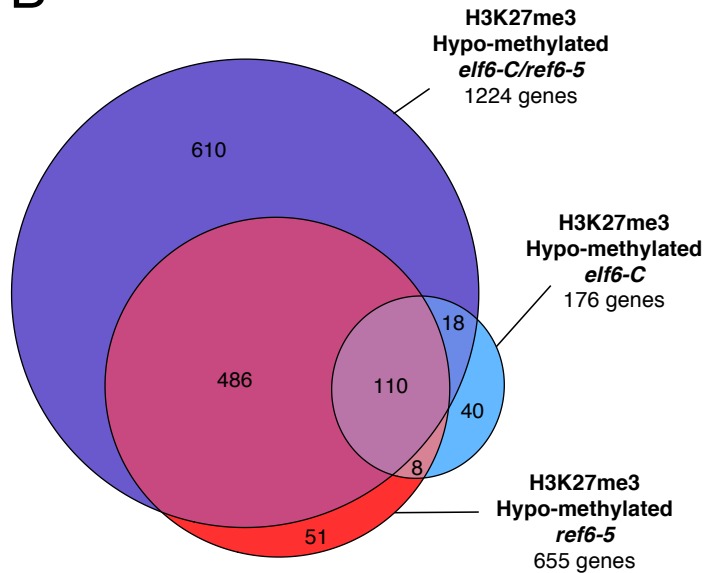

Supplement: supp [file elife-58533-supp-v1.zip]

A

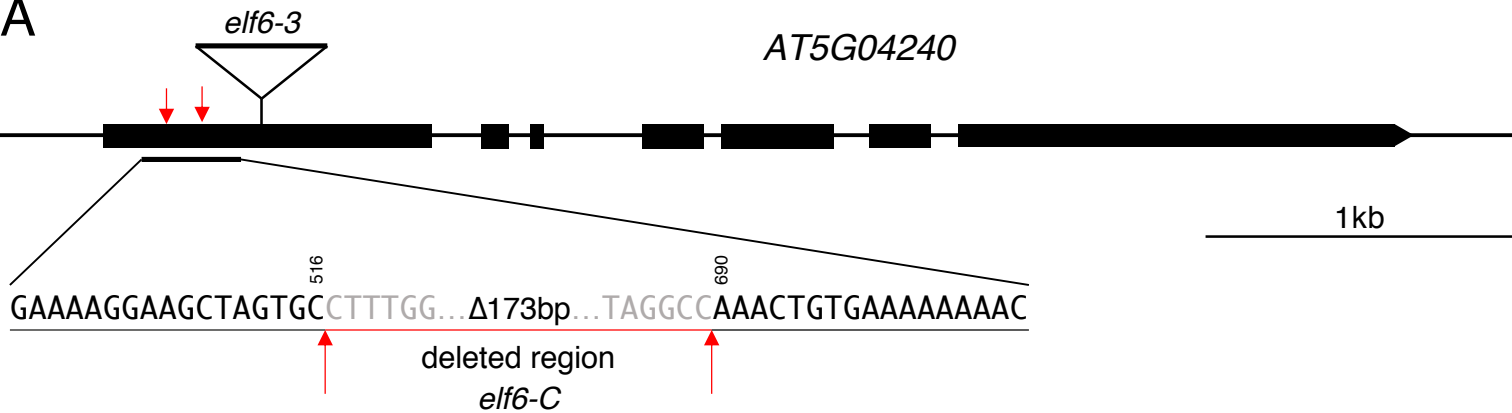

B

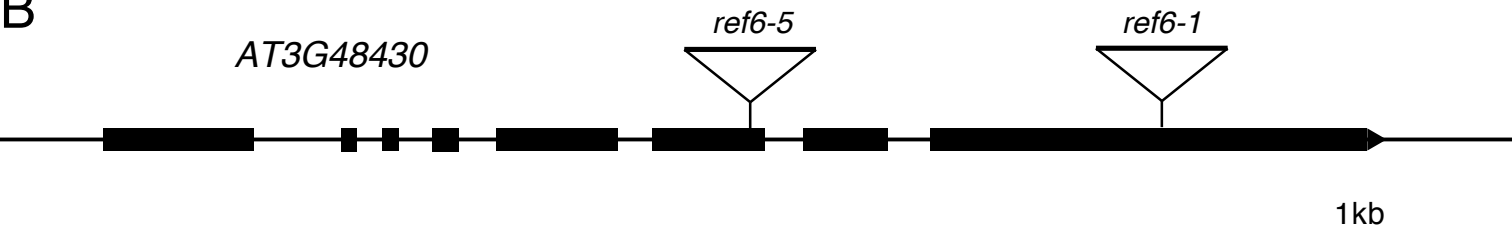

Supplement: supp [file elife-58533-supp-v1.zip]

**A**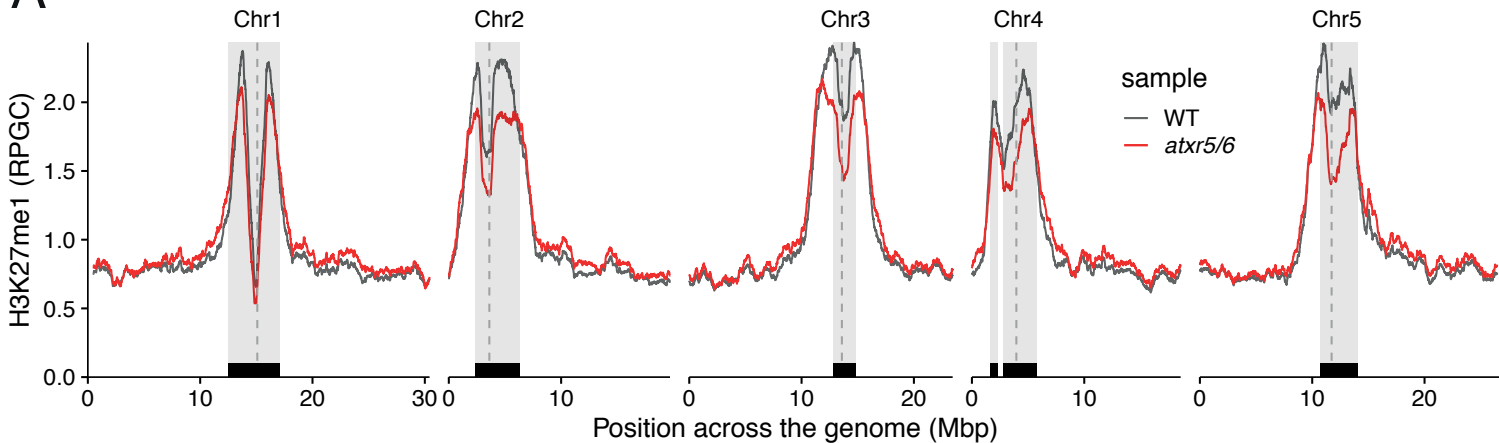**B**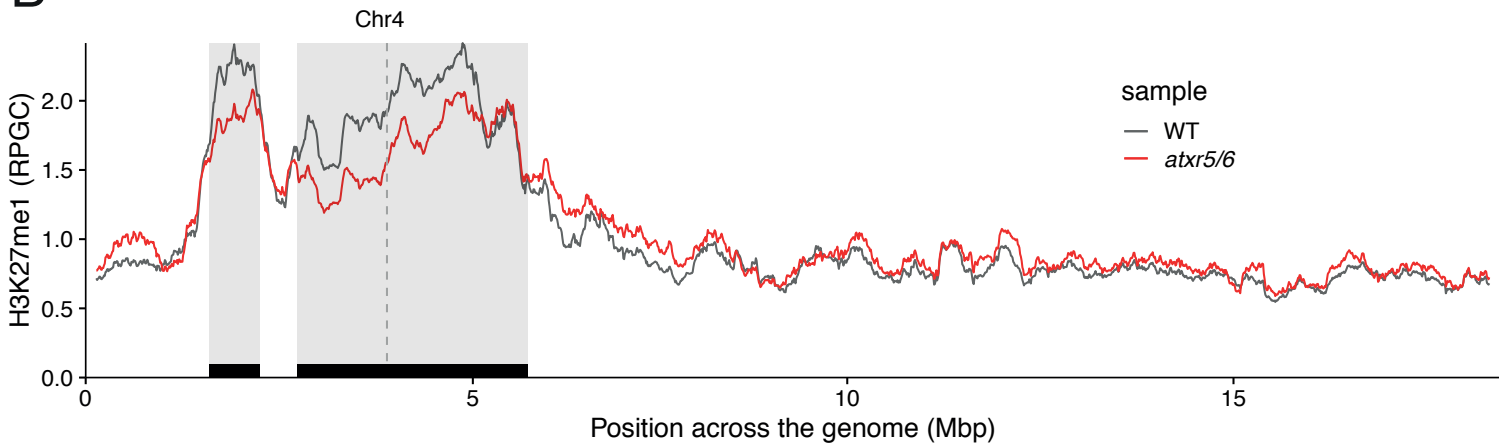

Supplement: supp [file elife-58533-supp-v1.zip]

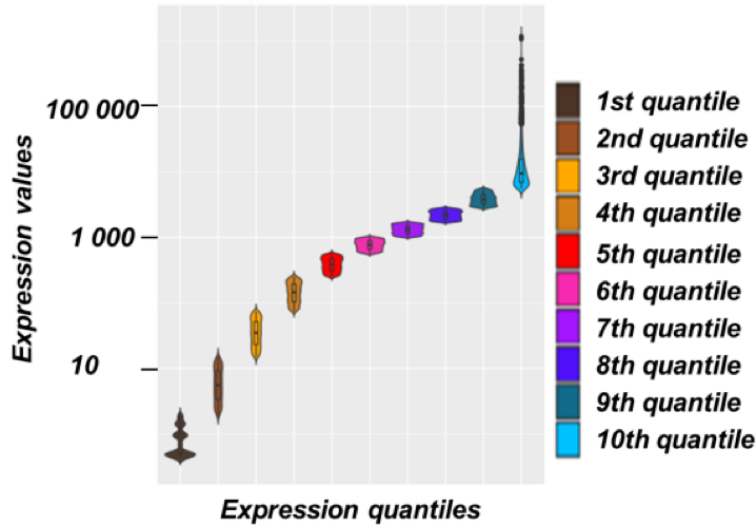

Supplement: supp [file elife-58533-supp-v1.zip]

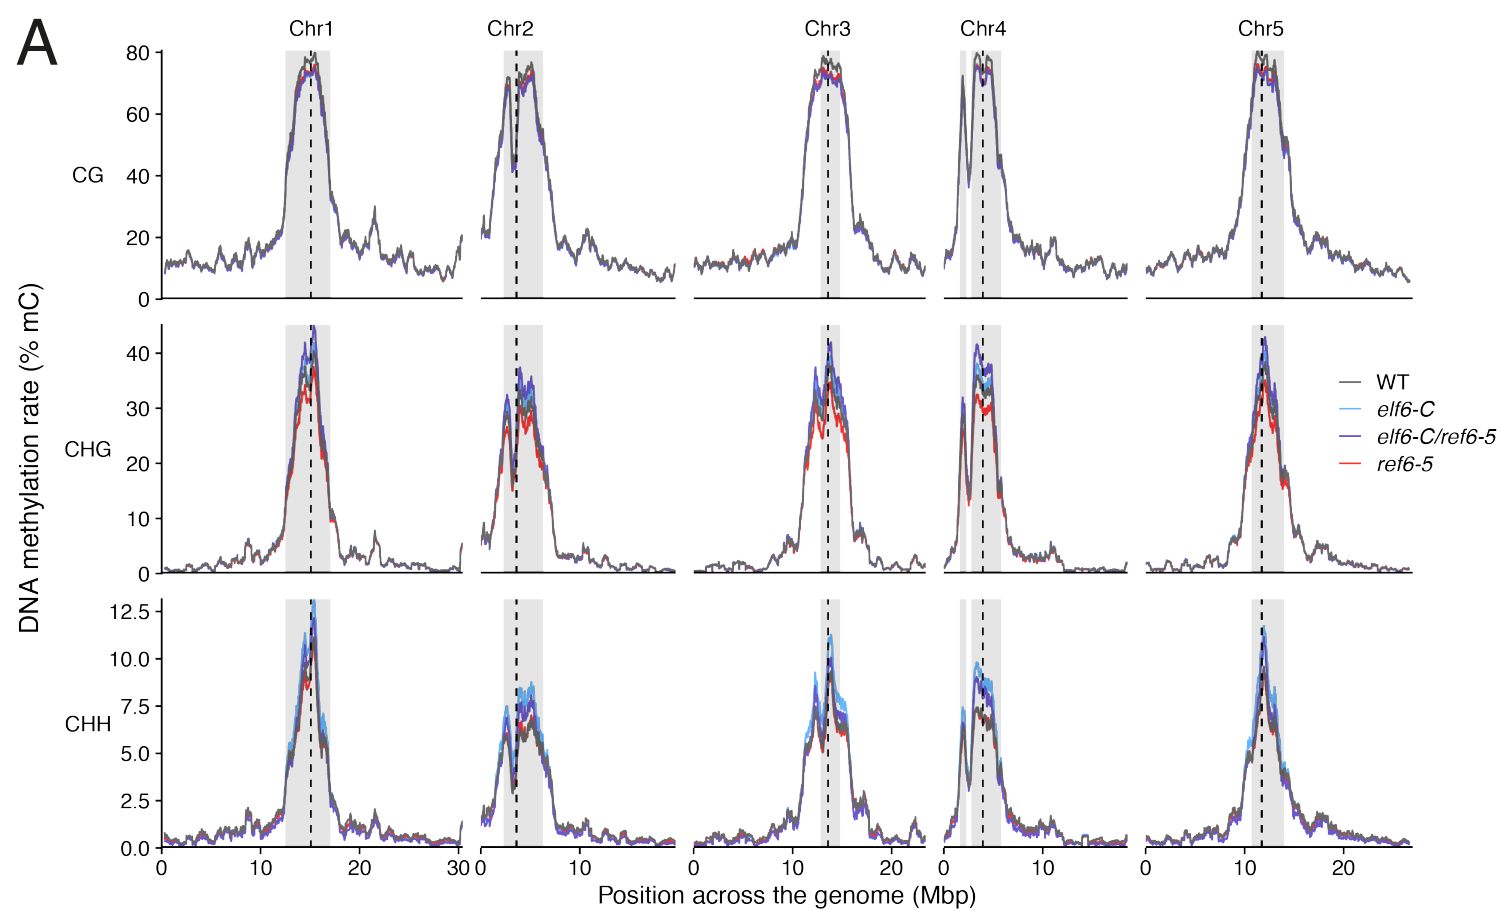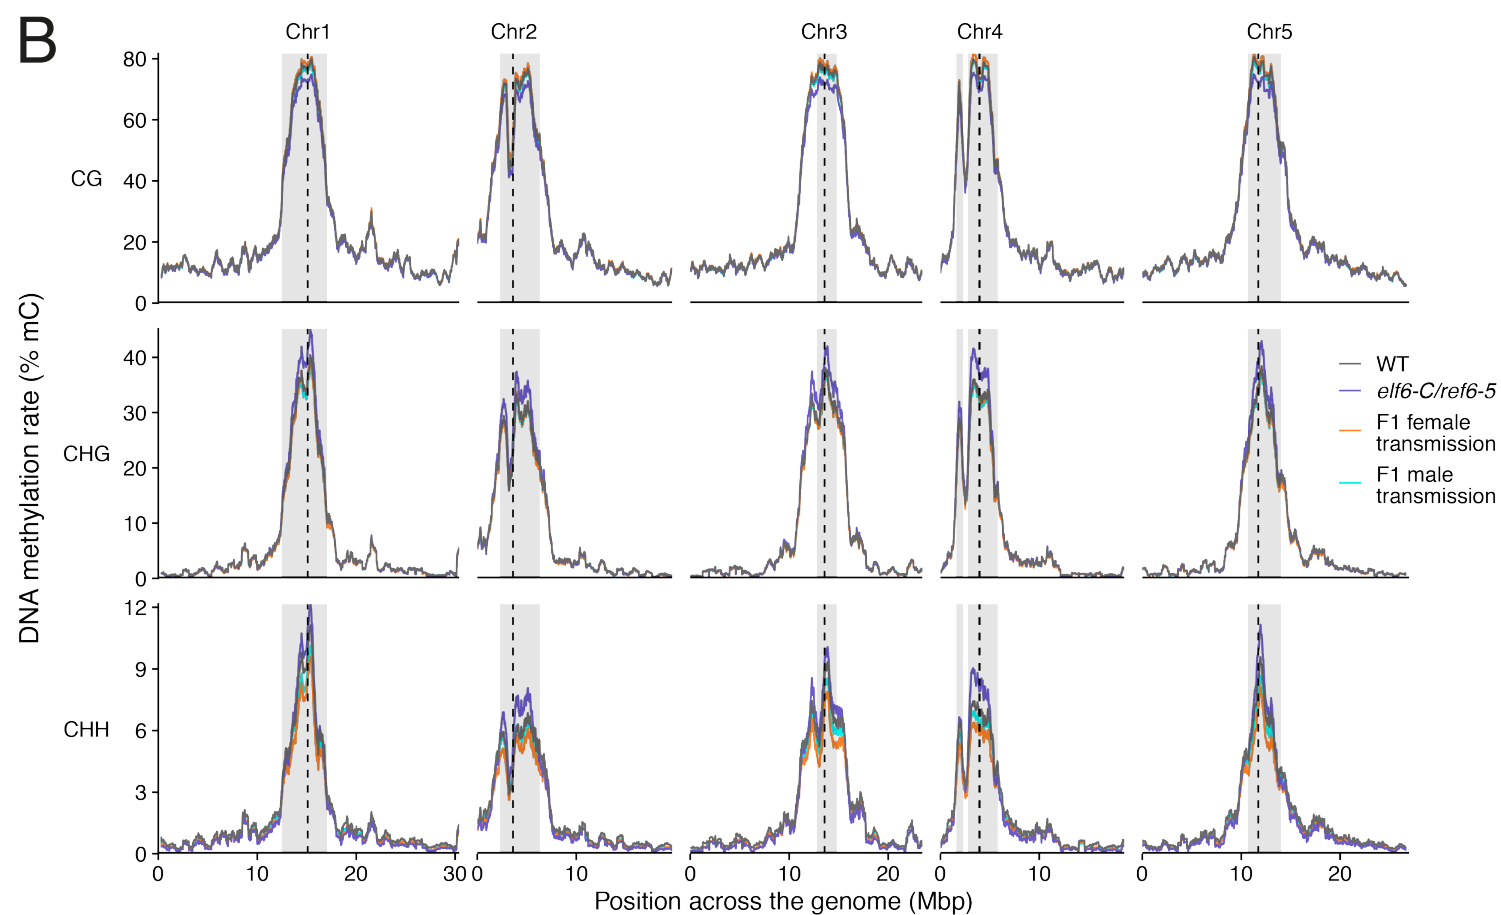

Supplement: supp [file elife-58533-supp-v1.zip]

**A**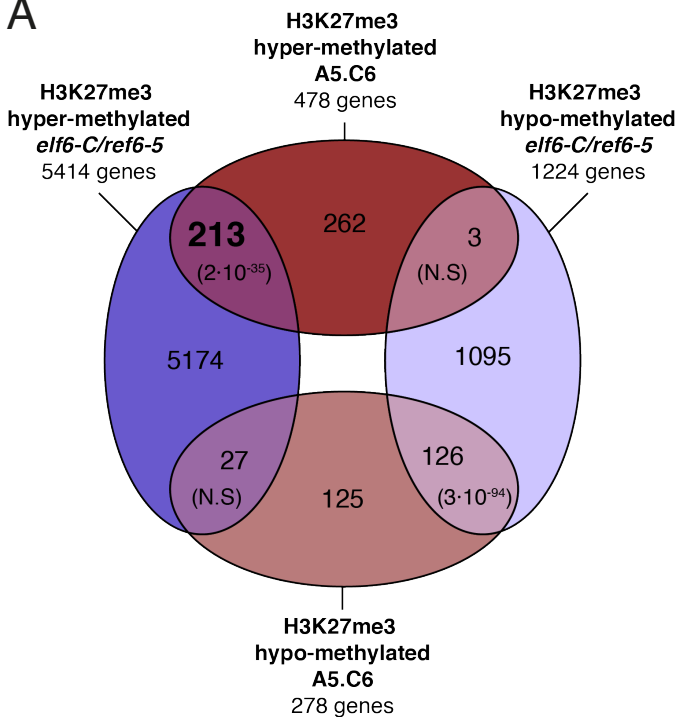**C**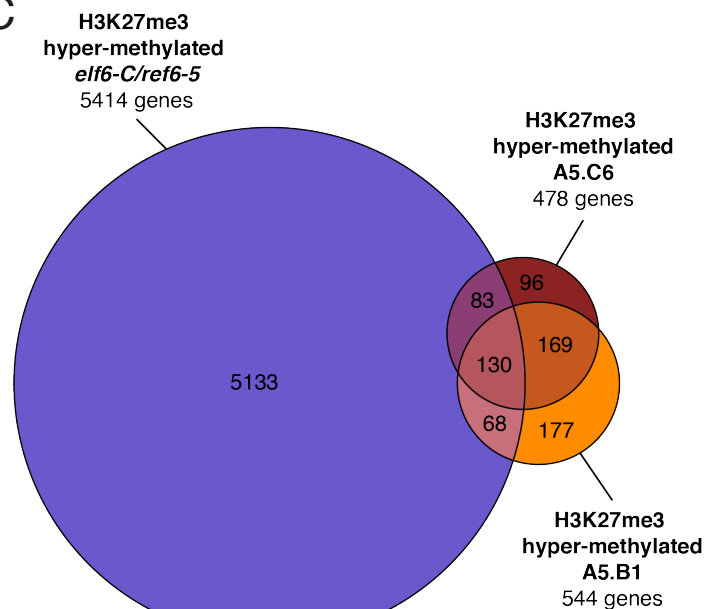**B**

A5.B1 H3K27me3 hyper-methylated genes also hyper-methylated in *elf6-C/ref6-5* (n=198)

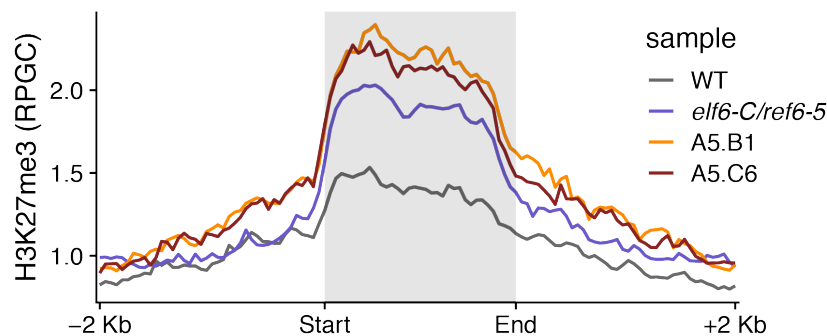

Supplement: supp [file elife-58533-supp-v1.zip]

A

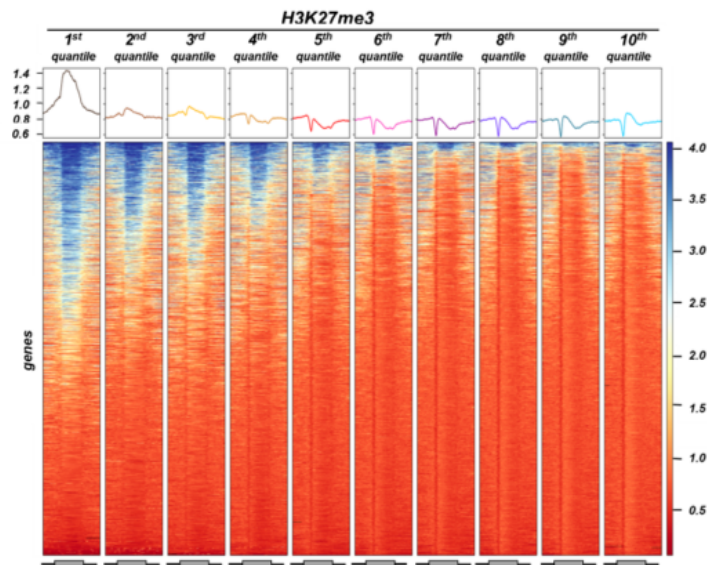

B

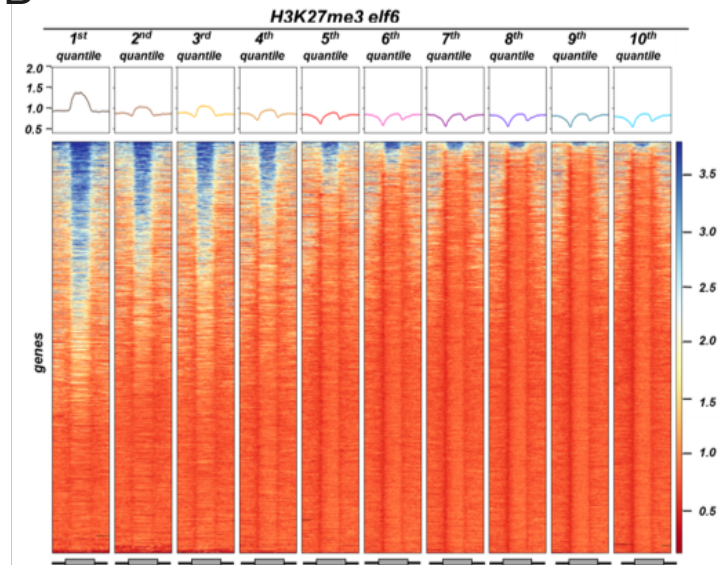

C

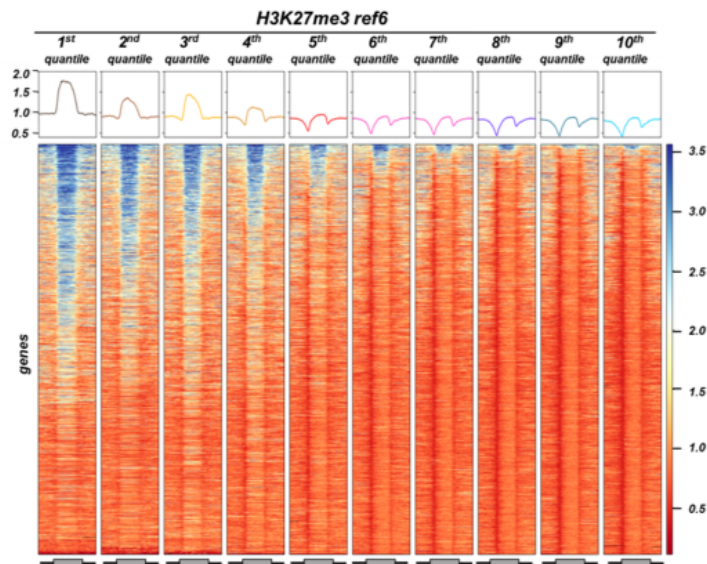

D

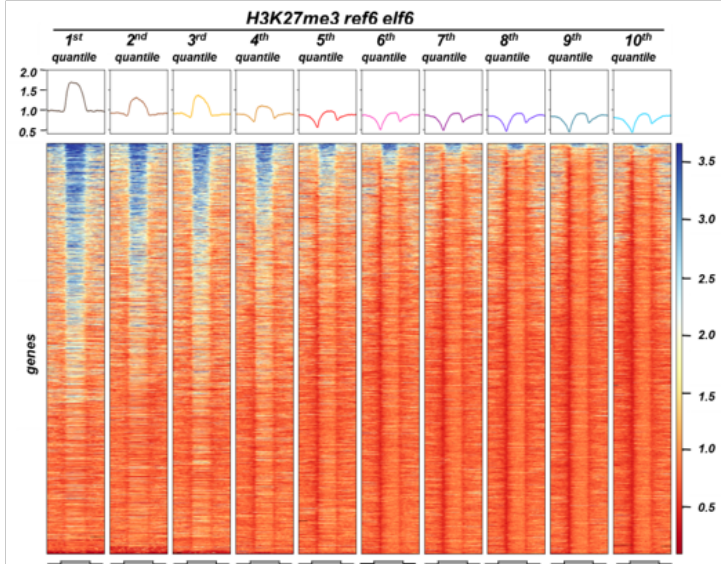

Supplement: supp [file elife-58533-supp-v1.zip]

**A**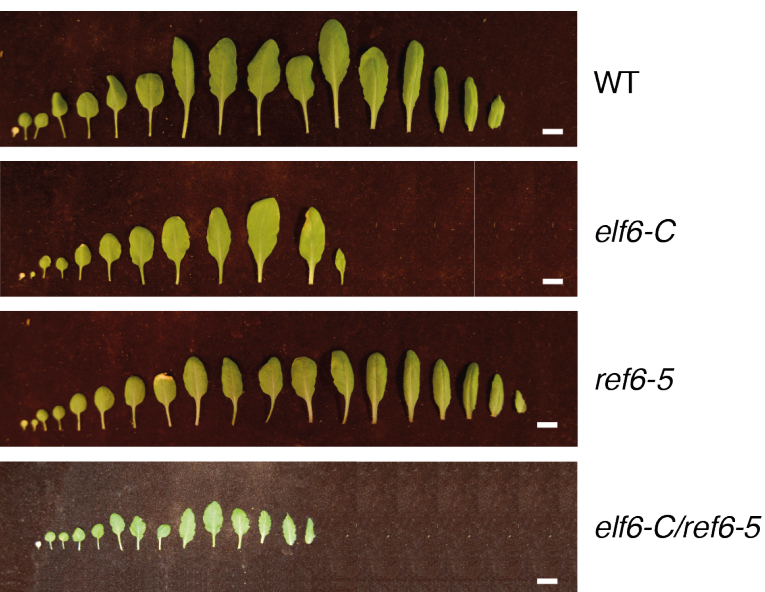**B**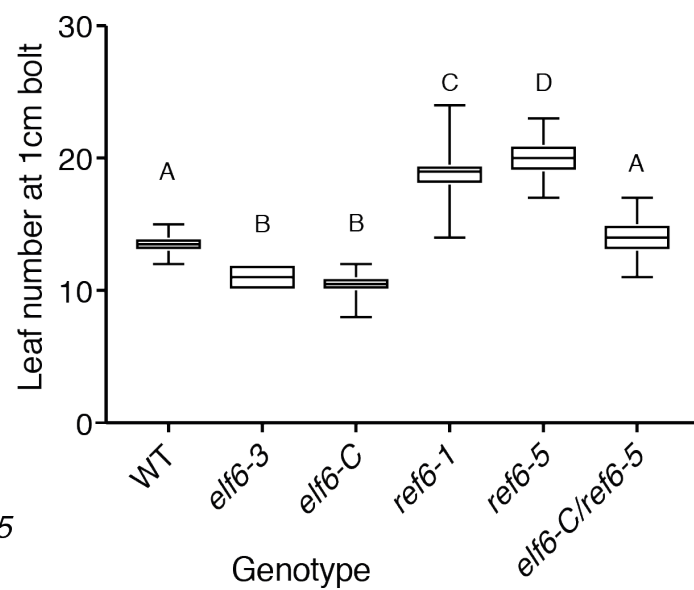**C**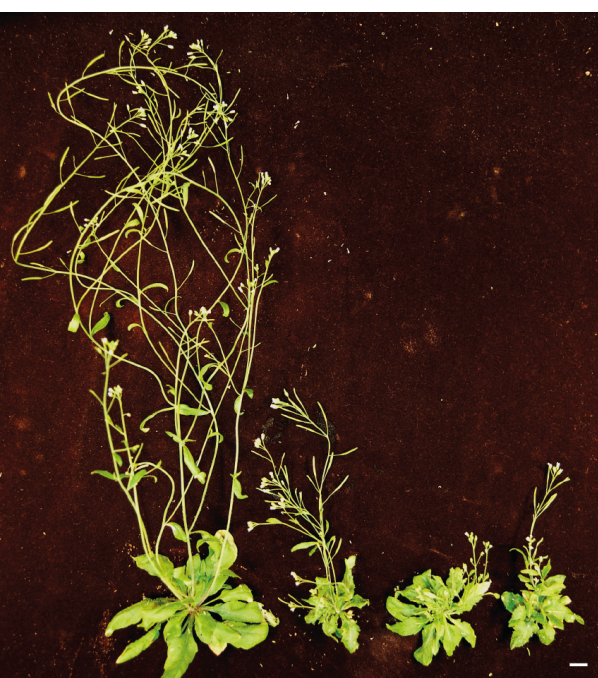**D**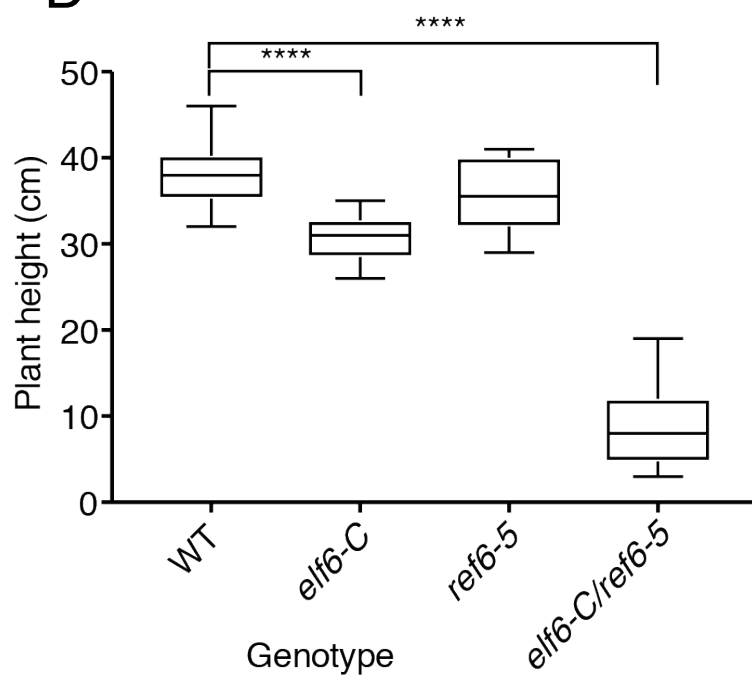**E**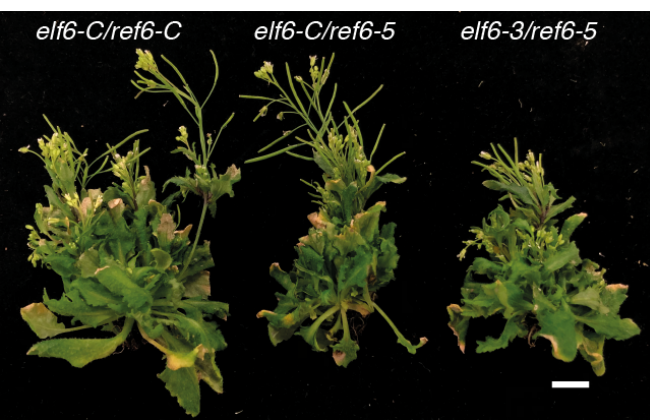**F**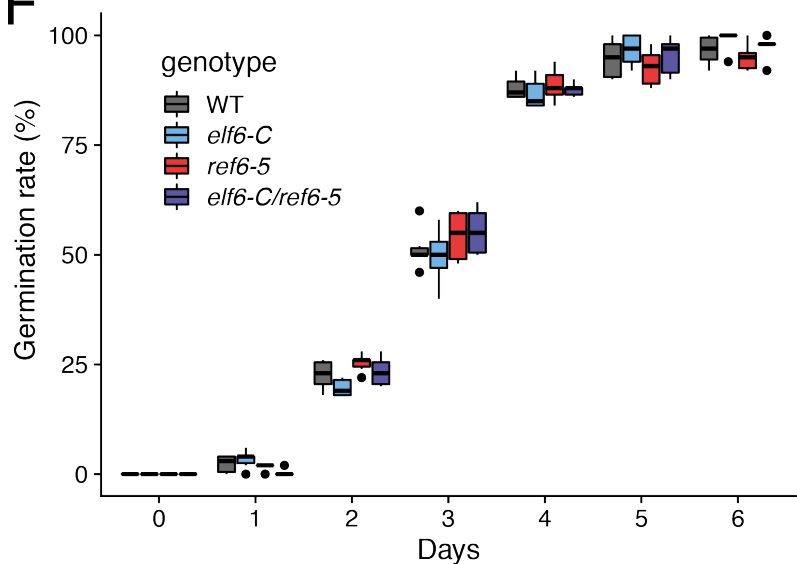

Supplement: supp [file elife-58533-supp-v1.zip › elife_poa_e58533_Figure_1_figure_supplement_2.pdf]

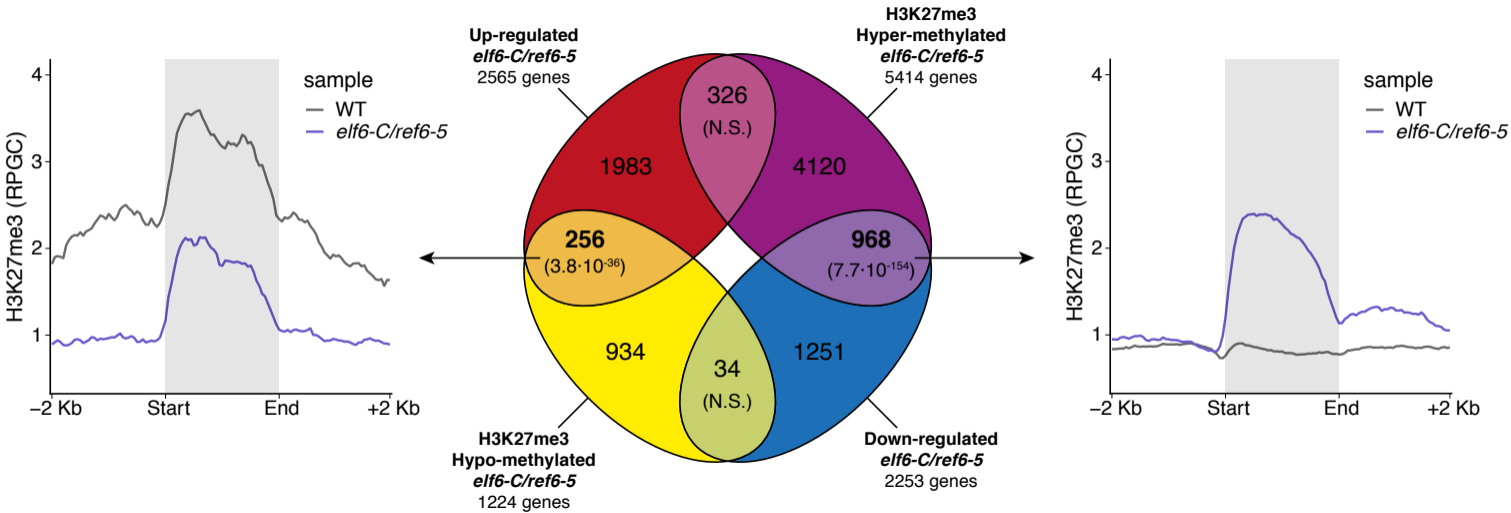

Supplement: supp [file elife-58533-supp-v1.zip › elife_poa_e58533_Figure_1_figure_supplement_6.pdf]

A

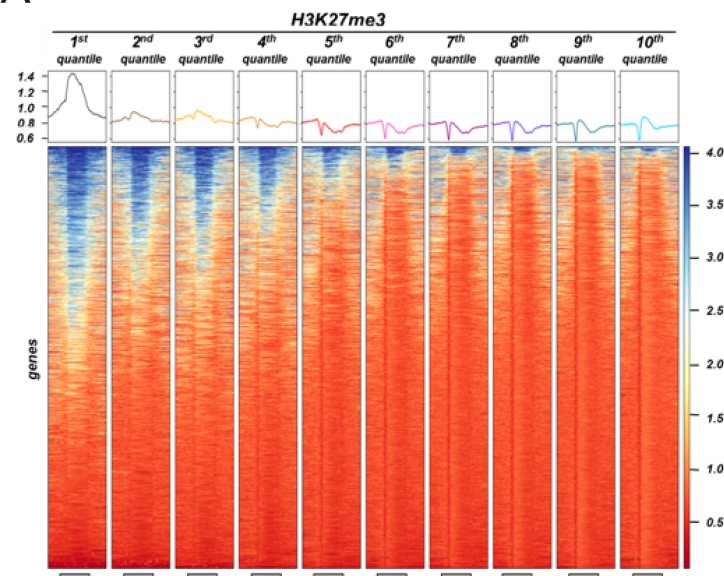

B

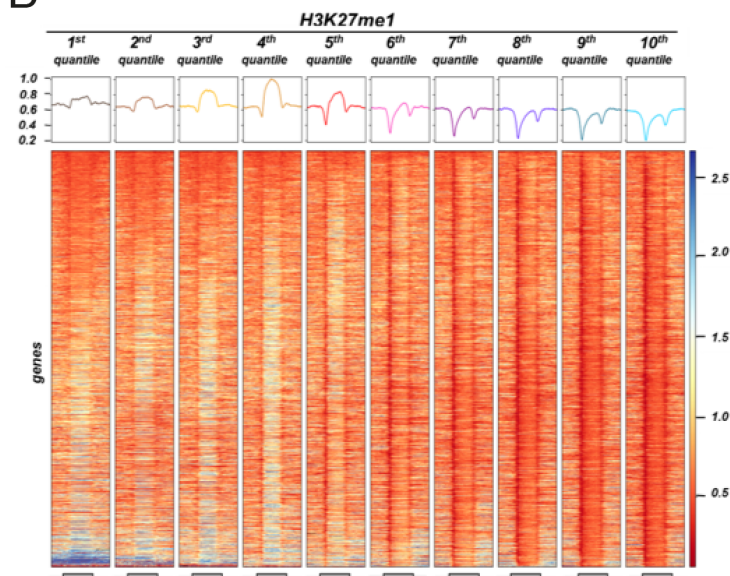

C

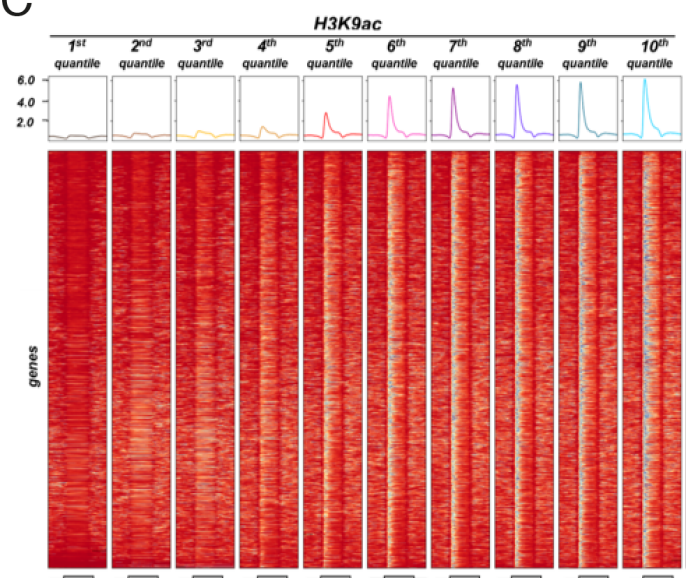

D

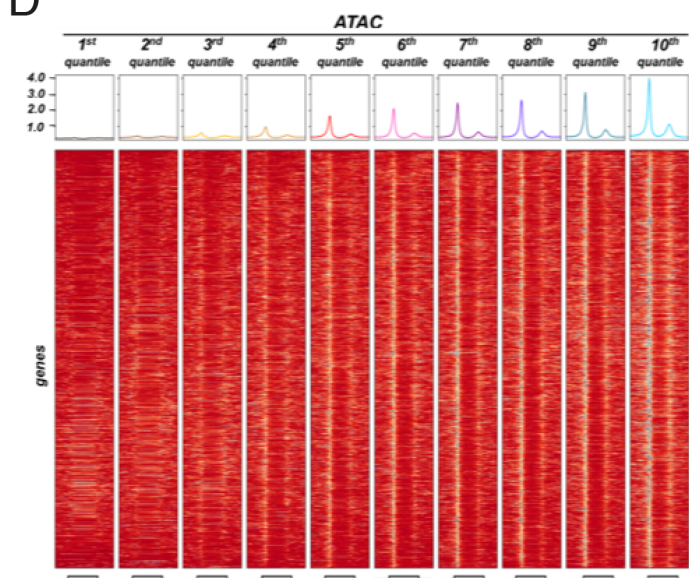

E

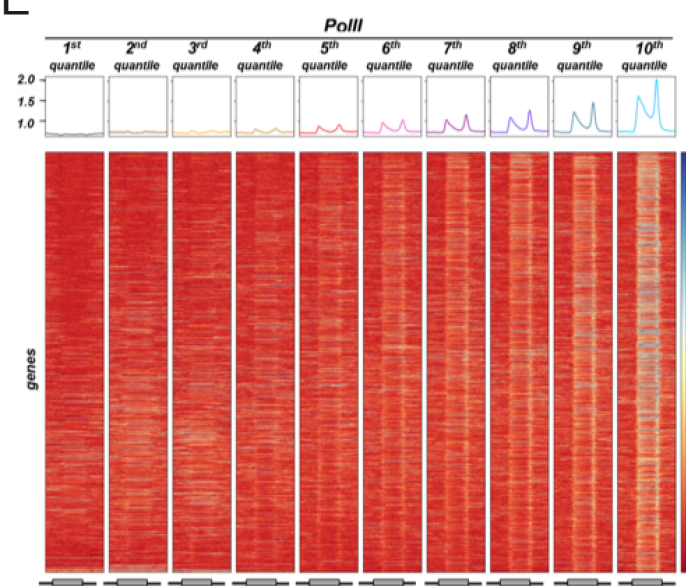

F

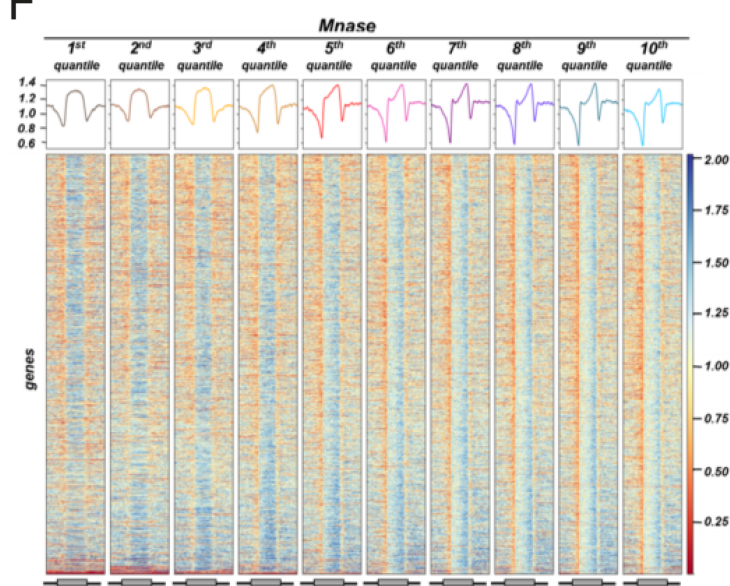

Supplement: supp [file elife-58533-supp-v1.zip › elife_poa_e58533_Figure_2_figure_supplement_5.pdf]

F3

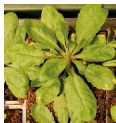

A5.A2

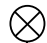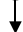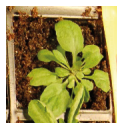

A5.A6

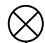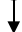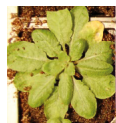

A5.C1

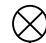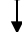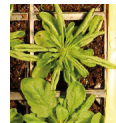

A5.C6

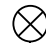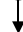

F4

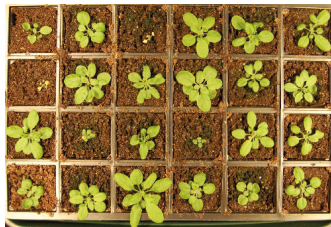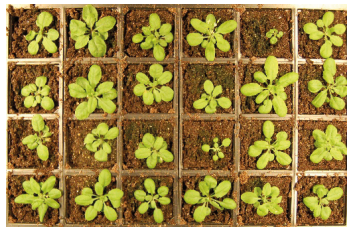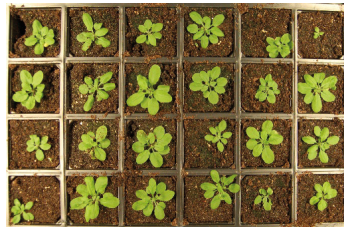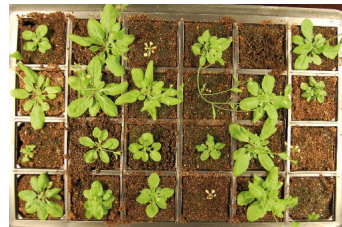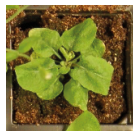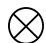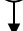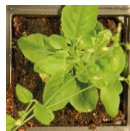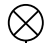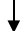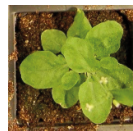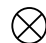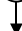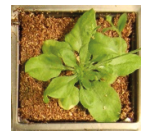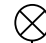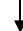

F5

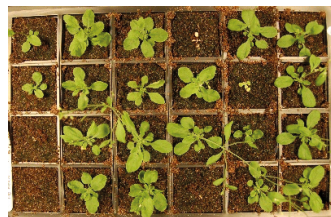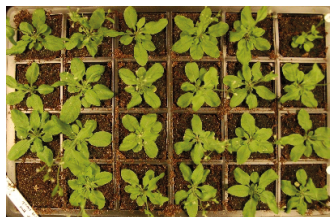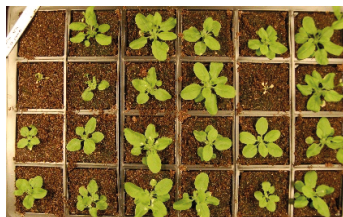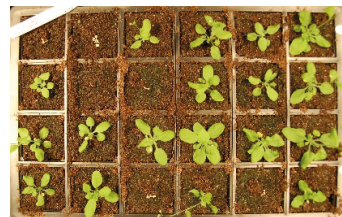

Supplement: supp [file elife-58533-supp-v1.zip › elife_poa_e58533_Figure_3_figure_supplement_1.pdf]

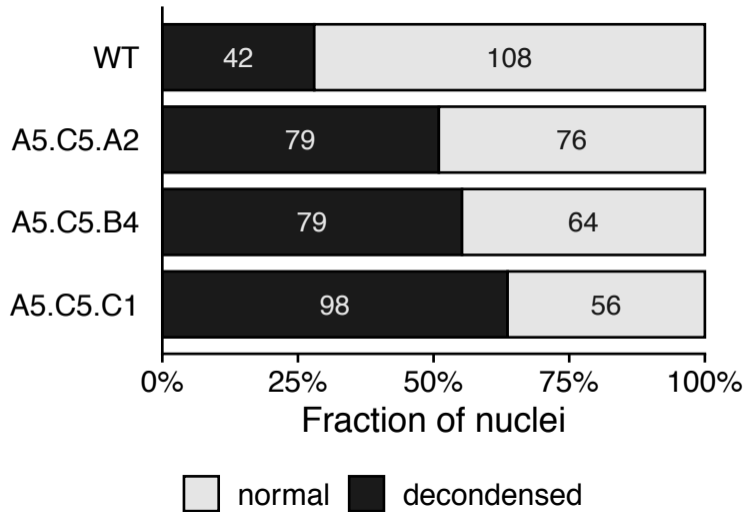

Supplement: supp [file elife-58533-supp-v1.zip › elife_poa_e58533_Figure_4_figure_supplement_3.pdf]

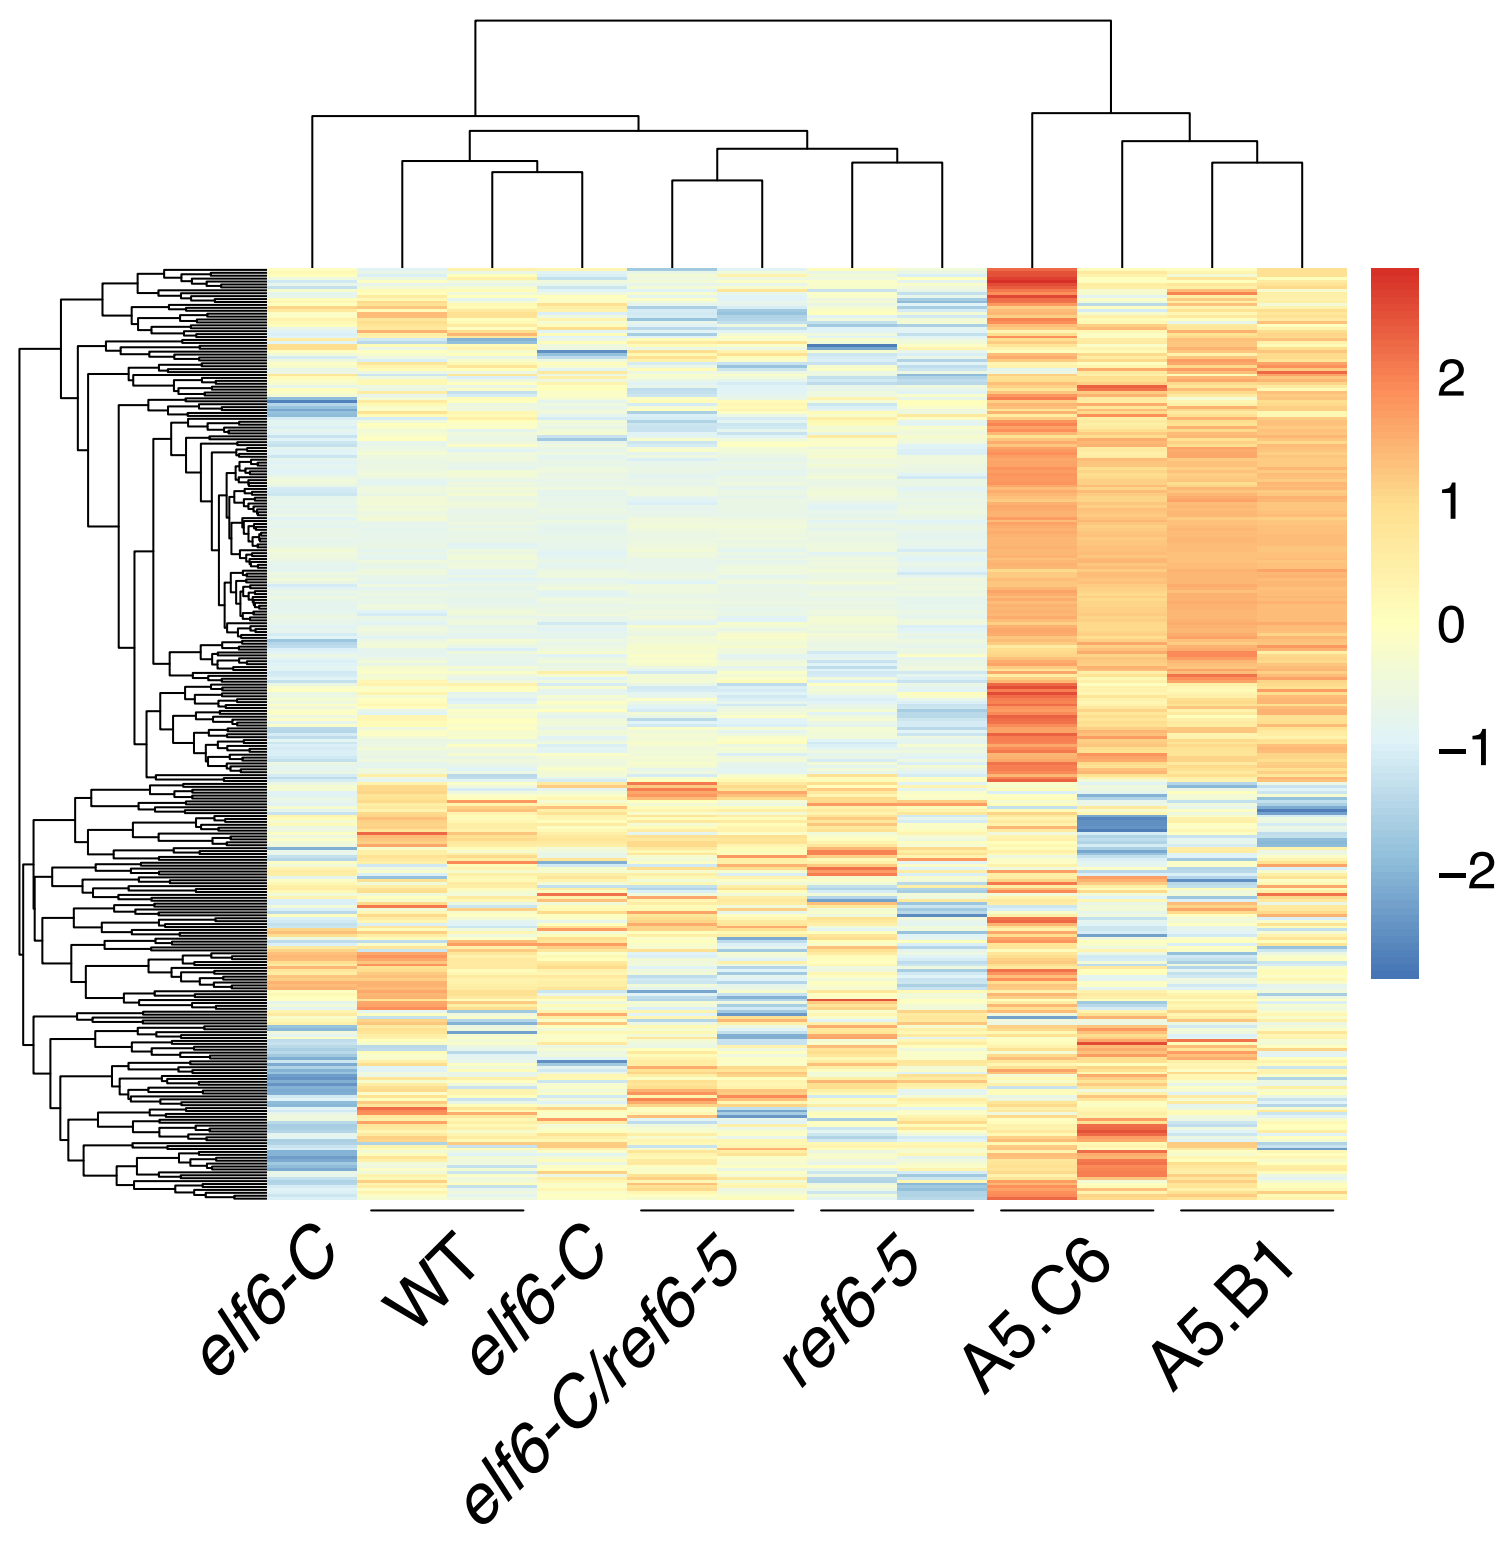

Supplement: supp [file elife-58533-supp-v1.zip › elife_poa_e58533_Figure_6_figure_supplement_1.pdf]

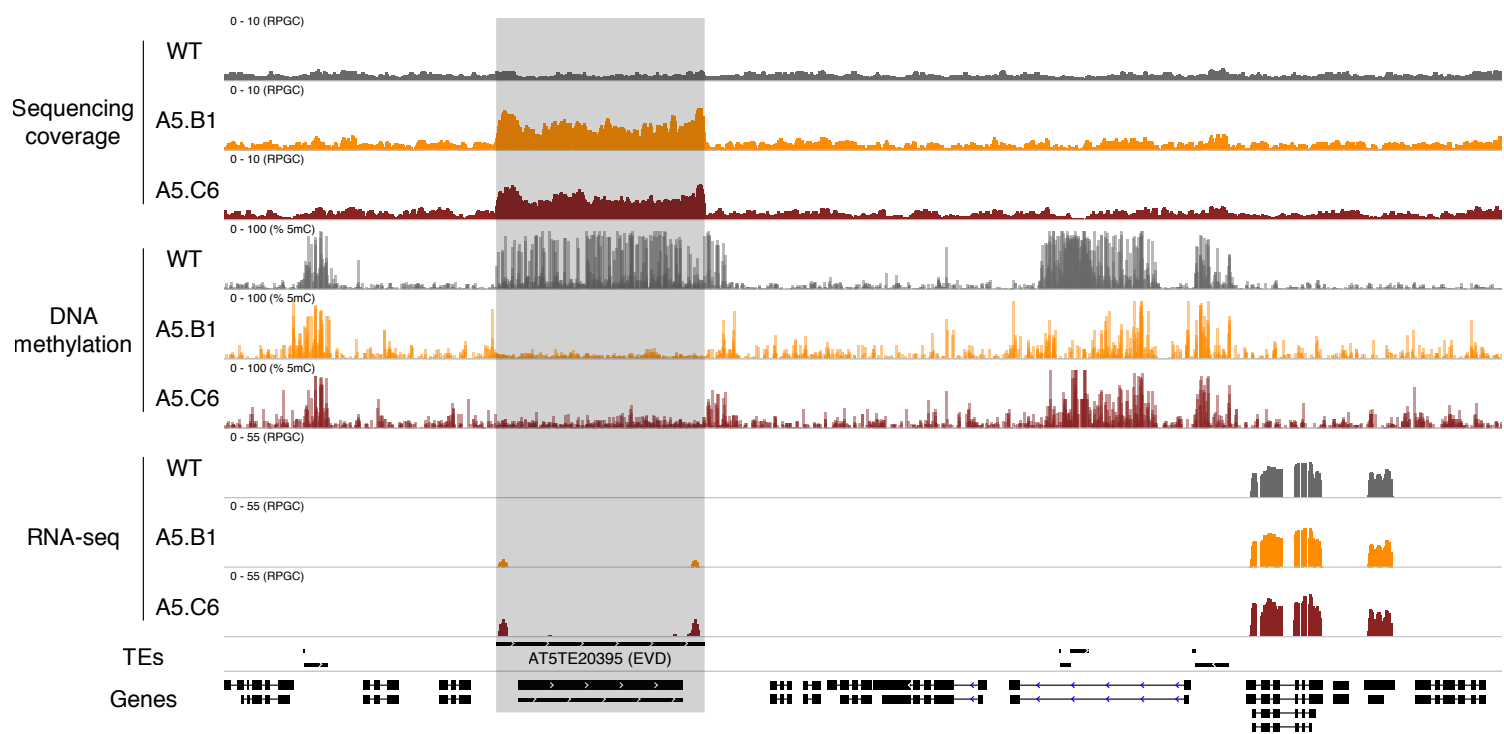

Supplement: supp [file elife-58533-supp-v1.zip › elife_poa_e58533_Figure_6_figure_supplement_2.pdf]
